# Supplementary material for: Proteolysis targeting chimeras (PROTACs) are emerging therapeutics for hematologic malignancies
Source: J Hematol Oncol. 2020 Jul 27;13:103. doi: 10.1186/s13045-020-00924-z (PMC7384229; doi:10.1186/s13045-020-00924-z)
Supplement: Supplementary file 2 — Additional file 2. List of 574 E3 ligases expressed in different cell types from all tissues. [file 13045_2020_924_MOESM2_ESM.xlsx]

## Sheet: Sheet1
			sex	PeripheralBlood	PeripheralBlood	PeripheralBlood	PeripheralBlood	PeripheralBlood	PeripheralBlood	PeripheralBlood	PeripheralBlood	PeripheralBlood	PeripheralBlood	PeripheralBlood	PeripheralBlood	PeripheralBlood	PeripheralBlood	PeripheralBlood	PeripheralBlood	PeripheralBlood	PeripheralBlood	PeripheralBlood	PeripheralBlood	PeripheralBlood	PeripheralBlood	PeripheralBlood	PeripheralBlood	BoneMarrow	BoneMarrow	BoneMarrow	BoneMarrow	BoneMarrow	BoneMarrow	BoneMarrow	BoneMarrow	BoneMarrow	BoneMarrow	BoneMarrow	Spleen	Spleen	Spleen	Spleen	Spleen	Spleen	Spleen	Spleen	Spleen	Spleen	Spleen
			cell	Proliferating B cell	B cell	Monocyte	Macrophage	Conventional dendritic cell	Plasmacytoid dendritic cell	Neutrophil_CAMP high	NK cell	Dendritic cell	Macrophage_FCGR3A high	T cell_TRAC high	B cell(Plasmocyte)_IGHM high	Monocyte_ISG15 high	Monocyte_S100A12 high	Dendritic cell_FCER1A high	Dendritic cell_LGALS2 high	B cell(Plasmocyte)_IGHG4 high	Dendritic cell_WDFY4 high	Monocyte_CXCR2 high	B cell(Centrocyte)	Monocyte_IGHG4 high	T cell	activative T cell	Eosinophil	B cell (Plasmocyte)	Neutrophil_S100A9 high	B cell (Centrocyte)	M2 Macrophage	Neutrophil_LTF high	B cell	Neutrophil_DEFA3 high	Neutrophil_S100A12 high	Monocyte/DC progenitor	Dendritic cell	HSPC	B cell (Plasmocyte)_IGHG_IGL high	B cell (Plasmocyte)_IGHG_IGK high	Erythroid cell	Neutrophil_OLFM4 high	T cell	B cell (Plasmocyte)_IGHA/HM_IGK high	B cell (Plasmocyte)_IGHA/HM_IGL high	Endothelial cell	B cell (centrocyte)	Neutrophil_S100A12 high	Lymphoid progenitor cell
			sex	Male	Male	Male	Male	Male	Male	Male	Male	Male	Male	Male	Male	Male	Male	Male	Male	Male	Male	Male	Male	Male	Male	Male	Male	Female	Female	Female	Female	Female	Female	Female	Female	Female	Female	Female	Female	Female	Female	Female	Female	Female	Female	Female	Female	Female	Female
			age	34Y	34Y	34Y	34Y	34Y	34Y	34Y	34Y	27Y	27Y	27Y	27Y	25Y	25Y	25Y	25Y	25Y	25Y	25Y	25Y	25Y	25Y	25Y	25Y	60Y	60Y	60Y	60Y	60Y	49Y	49Y	49Y	49Y	49Y	49Y	51Years	51Years	51Years	51Years	51Years	51Years	51Years	51Years	51Years	51Years	51Years
			nCell	13	96	555	103	43	32	15	260	164	158	150	23	338	1764	545	629	32	36	133	99	85	494	77	70	47	263	88	9	183	88	581	442	77	233	363	785	1916	30	196	180	474	327	40	287	114	25
	overallMean	overallMeanRank	MaxCell	Proliferating B cell PeripheralBlood	B cell PeripheralBlood	Monocyte PeripheralBlood	Macrophage PeripheralBlood	Conventional dendritic cell PeripheralBlood	Plasmacytoid dendritic cell PeripheralBlood	Neutrophil_CAMP high PeripheralBlood	NK cell PeripheralBlood	Dendritic cell PeripheralBlood	Macrophage_FCGR3A high PeripheralBlood	T cell_TRAC high PeripheralBlood	B cell(Plasmocyte)_IGHM high PeripheralBlood	Monocyte_ISG15 high PeripheralBlood	Monocyte_S100A12 high PeripheralBlood	Dendritic cell_FCER1A high PeripheralBlood	Dendritic cell_LGALS2 high PeripheralBlood	B cell(Plasmocyte)_IGHG4 high PeripheralBlood	Dendritic cell_WDFY4 high PeripheralBlood	Monocyte_CXCR2 high PeripheralBlood	B cell(Centrocyte) PeripheralBlood	Monocyte_IGHG4 high PeripheralBlood	T cell PeripheralBlood	activative T cell PeripheralBlood	Eosinophil PeripheralBlood	B cell (Plasmocyte) BoneMarrow	Neutrophil_S100A9 high BoneMarrow	B cell (Centrocyte) BoneMarrow	M2 Macrophage BoneMarrow	Neutrophil_LTF high BoneMarrow	B cell BoneMarrow	Neutrophil_DEFA3 high BoneMarrow	Neutrophil_S100A12 high BoneMarrow	Monocyte/DC progenitor BoneMarrow	Dendritic cell BoneMarrow	HSPC BoneMarrow	B cell (Plasmocyte)_IGHG_IGL high Spleen	B cell (Plasmocyte)_IGHG_IGK high Spleen	Erythroid cell Spleen	Neutrophil_OLFM4 high Spleen	T cell Spleen	B cell (Plasmocyte)_IGHA/HM_IGK high Spleen	B cell (Plasmocyte)_IGHA/HM_IGL high Spleen	Endothelial cell Spleen	B cell (centrocyte) Spleen	Neutrophil_S100A12 high Spleen	Lymphoid progenitor cell Spleen
ABTB1	0.0681634	66	0.844163	0.234441	0.211473	0.226202	0.137367	0.0885692	0.0781332	0.844163	0.221795	0.0323235	0.118439	0.15935	0.253685	0.196057	0.137501	0.0623467	0.102181	0.0656338	0	0.153845	0.0367349	0.177079	0.0734879	0.116272	0.0796533	0	0.173528	0.082354	0.273133	0.338339	0.0641094	0.0427926	0.176269	0	0.0506265	0.006544	0.00533078	0.00692735	0	0.115707	0.0580408	0.0216947	0.013916	0.0592985	0.0340886	0.232251	0.109778
AMFR	0.0148193	288	0.0710392	0	0.0234151	0.0500536	0.0156943	0	0	0	0.0159372	0.0196932	0.0524513	0	0	0.0303582	0.0357333	0.0201474	0.0298921	0	0	0.0232137	0.0578314	0.0710392	0.00594513	0.0362227	0.0434389	0	0.0105672	0	0	0	0	0.00786992	0.0169989	0	0.0122118	0	0	0.00466026	0	0.0370414	0.0285537	0.00395405	0.013801	0	0.00972329	0.0244411	0
ANAPC11	0.708924	2	1.88413	0.962005	0.360865	0.594611	0.732687	0.741942	0.695901	0.127014	0.51484	0.46209	0.437789	0.269052	0.253208	0.548192	0.540662	0.462978	0.562112	0.284359	0.481348	0.23013	0.502065	0.621225	0.371189	0.457884	0.425291	0.513011	0.77224	0.779144	0.56168	0.409627	0.790795	0.660683	0.514466	0.7887	0.642469	0.764249	0.812962	0.966439	0.648754	0.613497	0.615926	0.917822	0.863651	0.714531	0.667723	0.402411	0.279047
ANKFY1	0.019431	250	0.149745	0	0	0	0	0	0	0	0	0.0186934	0	0.0146198	0	0.0466219	0.0198638	0.0257261	0.0391543	0	0	0.0578322	0	0.036803	0.0262077	0	0	0.0490622	0.0087926	0	0	0.0447588	0	0.0995191	0.0644983	0	0	0.0126933	0.0066623	0.0061788	0	0.0274246	0.013153	0.00983261	0.0142286	0	0.0133789	0.0255862	0
ANKIB1	0.0160768	277	0.114325	0	0	0	0	0	0	0	0	0.0544638	0	0	0	0.01616	0.0168199	0.0250954	0.0275415	0	0	0	0.0317688	0	0.0188947	0.0420047	0	0	0.0155743	0	0	0	0.0284237	0.0240818	0.0334019	0.0352424	0.00978332	0.0156106	0.0109594	0.0119151	0.0467598	0.0361312	0	0.0106831	0.0193398	0.114325	0.0105294	0.0136283	0
AREL1	0.0202671	238	0.0767175	0	0.0280374	0.0428795	0	0.0518922	0	0	0.0114014	0	0	0.0403835	0	0.00724119	0.03299	0.0158853	0.0194029	0.0749342	0	0.0168558	0	0	0.0257314	0	0.0348549	0	0.0194264	0.0725341	0	0.0296555	0	0.0569427	0.0767175	0	0.0275006	0.0347459	0.0107693	0.00908735	0	0.0509346	0.0307011	0.0111374	0.0127487	0	0.00893839	0.0235768	0
ARIH1	0.0265264	194	0.148906	0	0.032586	0.0211261	0.0156943	0	0	0.148906	0.0241982	0.016869	0.0182453	0.0426881	0	0.0178091	0.020649	0	0.0051646	0	0	0	0	0.0362992	0.019294	0.0763398	0.0784906	0	0	0.0321614	0	0	0	0.0447448	0.0559818	0.0259538	0.0120766	0.0258013	0.0102694	0.0189765	0.0499026	0.0188812	0	0.0104796	0.00548194	0	0.0175324	0.0254853	0.108917
ARIH2	0.0940324	41	0.625502	0.316524	0.0332152	0.103138	0.0614662	0.110875	0	0.127014	0.112457	0.0477848	0.0687278	0.0626406	0.128209	0.0519971	0.0764491	0.0833027	0.070538	0.24742	0	0.024231	0.0597362	0.0703521	0.0697778	0.0419744	0.12112	0.151118	0.0519095	0.0315173	0.625502	0.0297439	0.0575437	0.0706333	0.0751154	0.0385891	0.0767938	0.0870851	0.0819325	0.12942	0.378472	0.106139	0.082375	0.0607374	0.0817918	0.166207	0.0460539	0.0192552	0.167917
ARMC5	0.00641135	380	0.0639975	0	0	0	0	0	0	0	0	0	0.0167507	0.0212726	0	0	0.00678206	0.00528072	0.00992044	0.0541207	0	0	0	0.0379144	0.00614764	0.0403057	0	0	0	0	0	0.0415576	0.0181059	0.00432278	0.00750602	0	0.0132251	0	0	0.00685536	0	0	0.0186348	0.00355307	0	0	0	0	0
ASB13	0.00961129	347	0.0635744	0	0.0321399	0.0459677	0.0195265	0.0419917	0	0	0	0.0325091	0.0199734	0.0210531	0	0.0254844	0.0233035	0.00988588	0.0238206	0	0	0.0168558	0.0635744	0.0379144	0.00660021	0	0	0	0.03462	0.0328312	0	0	0	0.0160931	0.00822628	0.0386578	0.0128134	0.0136016	0	0	0	0	0	0	0	0	0	0	0
ASB6	0.0169342	271	0.112618	0.112618	0.0320778	0.0477532	0.0202639	0	0.0499282	0	0.0480829	0.0130627	0.0560681	0.019229	0	0.00606258	0.032755	0.0163385	0.0286572	0	0.0852131	0	0	0	0.0129232	0	0	0.0389795	0.00810045	0.103549	0	0.0247846	0	0.0201393	0.0241768	0	0.0157384	0.0199258	0.00736326	0.00822071	0.03815	0.0224877	0.00679092	0.0109808	0	0.0292403	0.0106305	0.0178471	0
ASB7	0.0162887	276	0.204845	0.121071	0	0.0200969	0.0325814	0	0	0	0.0254911	0.018086	0	0	0	0.0179011	0.0120853	0.00469485	0.0193138	0	0	0	0	0	0.0190322	0	0	0	0.0544397	0	0	0	0	0.0125881	0.0343405	0	0.0117554	0.00569928	0.00681245	0.0152603	0	0.0315823	0.0115442	0.0133279	0	0.204845	0.0262276	0	0
ASB8	0.109788	36	0.233371	0.129085	0.161038	0.164713	0.188178	0.157103	0.0673012	0	0.196274	0.0474619	0.0514439	0.0799776	0.137396	0.136748	0.103325	0.120725	0.0924055	0.0660301	0	0.136206	0.0625529	0.0731737	0.0941253	0.152639	0.129565	0.167226	0.15709	0.156353	0	0.1455	0.129707	0.103133	0.224724	0.0773437	0.0963934	0.120038	0.114326	0.115373	0.172188	0.155837	0.233371	0.145473	0.122946	0.13514	0.0879905	0.14149	0.14495
ATRX	0.0876629	45	0.297652	0	0.13616	0.0587629	0.0577354	0	0	0.292345	0.0959625	0.0607231	0.13052	0.0610384	0.261547	0.0856416	0.0605507	0.0342917	0.0702373	0.0660301	0.204852	0.0214977	0.109688	0	0.0853752	0.0436312	0.229569	0.10966	0.0252575	0.0221341	0.273133	0.0753206	0.0798464	0.137701	0.138957	0.275027	0.146254	0.186057	0.0643774	0.0543905	0.186027	0.10552	0.052762	0.0825595	0.0425914	0.0938218	0.145893	0.0651871	0.121934
BACH1	0.077406	53	0.437854	0	0.0331457	0.154367	0.137719	0.0372365	0	0.437854	0.0340487	0.0372516	0.131232	0.0201463	0	0.161386	0.152406	0.0539746	0.133707	0.0559795	0	0.0621819	0.0545764	0.118983	0.0307081	0.0678864	0.130654	0	0.0442763	0.0545406	0	0.0711527	0.0134838	0.0651768	0.0506268	0.0335338	0.0645048	0.0192581	0.0157942	0.0311017	0	0.0200162	0.0256178	0.035826	0.02708	0.0292403	0.0244625	0.17312	0
BARD1	0.0165986	273	0.132479	0	0	0	0	0	0	0	0	0	0	0.019229	0	0	0.00533048	0.00453394	0	0	0	0	0	0	0	0	0.0465442	0.0529799	0.00686234	0	0	0.0138399	0.0418542	0.0704485	0.0673348	0.040253	0.0368536	0.0631442	0.0202763	0.0196959	0.125523	0.0732854	0.0169565	0.033944	0.0196747	0	0	0	0
BCL6	0.0365788	150	0.272862	0	0	0.0419443	0.0203972	0.105996	0	0	0.0115382	0.0168097	0.0370507	0	0	0.0408335	0.0356898	0.0156027	0.0319216	0	0	0.0246431	0	0	0.00634097	0	0.0448393	0	0.0477999	0.0357883	0	0.0717784	0	0.0860323	0.272862	0.0332727	0.0485093	0.00701865	0.00583661	0.00689882	0	0.0290271	0	0	0.0074966	0	0.0238258	0.181137	0.0986815
BFAR	0.0766145	55	0.320968	0.173087	0.189131	0.136919	0.230559	0.0877875	0.320968	0	0.1782	0.0850844	0.155114	0.074753	0	0.0910052	0.071861	0.0779698	0.074514	0.196819	0	0.152404	0.0963544	0.112814	0.0852384	0	0.173591	0.0841002	0.0501832	0	0	0.0714381	0.0981759	0.068861	0.0714791	0.112693	0.0718635	0.0572798	0.0428865	0.0603801	0.0392545	0.0865844	0.0490761	0.0414472	0.110427	0.119237	0.0737143	0.0429141	0.119279
BIRC2	0.118895	33	0.500226	0.129085	0.0726276	0.177203	0.220705	0.277711	0.142132	0.178929	0.127473	0.0992935	0.205105	0.159008	0	0.133758	0.142379	0.143973	0.171137	0	0.153406	0.15469	0.202068	0.109268	0.107661	0	0.164243	0	0.0646078	0.0497561	0	0.119669	0.059234	0.137371	0.161589	0.206091	0.170682	0.0536241	0.0654165	0.0988164	0.17436	0.180556	0.110868	0.149675	0.0768202	0.0742148	0.0731518	0.159768	0.160946
BIRC3	0.376554	5	1.41184	0	1.00234	0.157202	0.380023	0.0806108	0.0774053	0.139518	0.0544038	0.150538	0.107817	0.45217	0.850418	0.0733937	0.0773867	0.062153	0.0596466	0.153642	0.0654989	0.0610884	0.979901	0	0.123123	0	0.0434389	0.282896	0	0	0	0.0248544	0.998764	0.0340857	0.0606751	0.109255	0.277378	0.0219473	0.319451	0.379277	0.0552049	0.0174556	0.431556	0.656907	0.536278	0.410771	1.23137	0.165052	0.947626
BMI1	0.0327887	164	0.267755	0	0	0.00839547	0.0538875	0	0	0	0.0489687	0.0182482	0.0206361	0.0174133	0	0.0164994	0.0197627	0.0241372	0.00428734	0	0	0	0	0.0306471	0.0317592	0.0321814	0.0740091	0.207054	0.0364016	0	0.267755	0.0277263	0.148781	0.0565978	0.0374715	0.0373765	0.030519	0.0322524	0.0208717	0.0269055	0.0540027	0.0482638	0.013153	0.0305089	0	0.0342486	0.0269537	0.0127491	0
BRAP	0.0270085	190	0.307588	0	0.0601373	0.074339	0	0.0386191	0	0.307588	0.0903975	0.0671188	0.0169548	0.0210819	0	0.00694565	0.027319	0.0261814	0.0225128	0.0554014	0	0.0423418	0	0	0.0305399	0.0315016	0	0	0.00810045	0	0	0	0.026066	0.0446889	0.0398805	0.0456046	0.0101611	0.0371053	0.0180385	0.0137222	0.0459515	0.0281091	0.01585	0.0345449	0.0402531	0.125082	0.00353927	0	0.130228
BTBD1	0.0196113	248	0.712484	0	0	0.0123115	0.0392248	0.0372365	0	0	0.046291	0.0347086	0.0182857	0.0424971	0.118678	0.0366149	0.0376058	0.0393372	0.0236393	0	0.0756367	0.0219559	0	0.0365122	0.0444525	0.0426935	0	0	0	0	0	0	0	0.00939149	0.00983577	0.0289403	0	0	0.00598149	0.0105685	0	0.0308473	0.036155	0	0.0294211	0	0.0414273	0	0
BTBD10	0.0474888	103	0.173087	0.173087	0.0989749	0.0587661	0.102963	0.0496361	0	0	0.0776009	0.0546266	0.105847	0.0408658	0.143255	0.0366318	0.0449496	0.0535244	0.0425713	0.0721109	0	0.0641015	0.0317688	0.0368276	0.0695509	0	0	0	0.0344268	0.0276067	0	0.0160301	0.0386881	0.087537	0.0962967	0.112196	0.0325509	0.0318359	0.0339744	0.0412937	0	0.10637	0.00936237	0.0526348	0.0298064	0	0.041519	0.1349	0.130228
BTBD2	0.0116342	328	0.335155	0.112618	0.0255961	0.0181653	0.0299363	0	0	0.127014	0.0122813	0	0.0317891	0.0211692	0	0.00704906	0.0171769	0.014001	0.0049536	0	0	0.0184024	0.0317688	0	0.010934	0	0	0.0524902	0.0113315	0	0.335155	0.0278012	0.0627584	0.0278009	0.03489	0.034199	0.00892878	0.0235789	0	0.00227899	0	0.0139746	0	0	0	0	0	0.0226798	0
BTBD3	0.00834571	361	0.0850155	0	0	0	0	0	0	0	0	0.0137575	0	0	0	0	0.0127065	0.0154924	0	0	0	0.0234427	0	0	0	0	0	0	0.00917679	0	0	0	0	0.0250214	0.025268	0	0	0.00592548	0	0.0012226	0	0.0227789	0	0	0	0	0	0	0
BTBD6	0.0110851	335	0.216111	0.216111	0	0.0346994	0	0	0	0	0.0189069	0	0.0169548	0.0210531	0	0.00876515	0.0112742	0.0193433	0.0121661	0	0	0.0398977	0	0	0.0177622	0	0.0778931	0	0.0111349	0.0254838	0	0.0123838	0	0.016971	0.0363518	0.0317111	0.0321843	0.00664365	0	0.00981064	0.0422046	0.0310557	0	0	0.00856479	0.0451199	0.0063453	0	0
BTBD7	0.0176343	264	0.130228	0	0	0.0376099	0.0210144	0.0537971	0.103358	0	0.0319751	0	0.0197465	0.0215468	0	0.0257021	0.0277692	0.0213872	0.00397661	0	0.0541916	0	0	0.0372544	0.00588122	0	0	0	0.0471572	0	0	0.0254277	0.0620705	0.0413717	0.0644756	0.0322989	0.0204981	0.0281772	0.00422887	0.00405046	0.0392545	0.0279461	0.0146966	0.00570024	0	0	0.011016	0.0136283	0.130228
BTBD9	0.00203653	440	0.0459737	0	0	0	0	0	0	0	0	0	0	0	0	0	0	0	0	0	0	0	0	0	0	0	0	0	0	0	0	0	0	0	0	0	0	0.00717953	0	0.00198675	0.0459737	0	0	0.0051902	0	0	0	0	0
BTRC	0.0167688	272	0.712484	0	0	0	0	0	0	0	0	0.0187532	0	0	0	0	0.0134082	0	0.0046009	0	0	0	0.0322312	0	0.0188862	0.0765107	0	0	0.00874619	0	0	0	0.0263152	0.0139156	0.00945623	0	0.00992822	0.00669774	0.00834089	0.0179458	0.0660693	0.0170678	0	0	0.0234688	0.0292403	0.0369569	0	0
CBL	0.0330566	162	0.712484	0	0.0430108	0.0220707	0.0848315	0.047464	0	0	0.00979494	0.0191259	0.036241	0	0	0.0491039	0.0565468	0.051829	0.0279578	0	0.0848895	0.0462647	0.0592651	0.0351871	0.0246213	0.0705519	0	0.0517093	0.0383752	0.0357883	0	0.0462809	0.022187	0.0753305	0.144526	0.0602028	0.0645168	0.00819527	0.00487763	0.00565209	0	0.0787624	0.00882926	0.00958371	0.00603516	0	0.0181885	0.0674862	0.116213
CBLB	0.0142687	295	0.712484	0.121823	0	0.00787265	0	0.0449533	0.124158	0	0.112991	0	0.0400284	0.0188481	0	0	0.00927501	0.00911215	0	0	0	0	0.0616038	0	0.0724716	0	0	0	0.0168077	0.0621319	0	0	0.0134838	0.0223782	0.0277653	0.0249669	0.0236546	0.0134954	0.00290083	0	0.0726084	0.0115624	0.0929743	0	0	0	0	0	0.110829
CBLL1	0.0449655	111	0.323653	0.0791708	0.0309152	0.085996	0	0.0372365	0	0	0.0705446	0.0685298	0.0368567	0.123107	0.135025	0.0340786	0.0538057	0.0364762	0.0378865	0	0	0.0727294	0	0.10953	0.0635286	0.0364672	0	0	0.0206397	0.0316138	0	0.0255203	0	0.092976	0.126407	0.142932	0.113808	0.141001	0.0235366	0.0353561	0.323653	0.0314572	0.0507824	0.0149715	0.0398856	0	0.0349541	0	0
CCNB1IP1	0.0234887	219	0.285705	0.285705	0.0338886	0.0618715	0	0.172187	0.0628334	0	0.0485786	0.0626566	0	0.0804628	0	0.0251977	0.0222874	0.0431932	0.0189583	0	0.0665326	0.0652861	0	0	0.0186197	0.0419744	0.111676	0.118751	0.00588283	0.09981	0	0.0312522	0	0.0645906	0.0201466	0.0272356	0.059447	0.0778743	0.00670037	0.00846082	0.0540027	0	0	0.00445503	0.015909	0.0686112	0.0395289	0.0206991	0
CGRRF1	0.0449044	112	0.151104	0	0.0661202	0.0631479	0.0940084	0	0.0781332	0	0.0572174	0.0708396	0.0199192	0.0206902	0	0.0405954	0.0438552	0.0461822	0.0565783	0.0541207	0.0738576	0.0435194	0.0267581	0	0.0756058	0.0749799	0.0858378	0	0.0109369	0	0	0	0.0318095	0.0159124	0.03318	0.0367365	0.021807	0.0204769	0.0504423	0.0647112	0	0.0273211	0.106327	0.0390239	0.0257386	0.151104	0.0501277	0.0453912	0
CHFR	0.0358562	153	0.230609	0.186759	0.056224	0.0604699	0.080843	0.0499753	0	0	0.069704	0.0282551	0.0571835	0.0581847	0	0.0277791	0.0361369	0.0731551	0.0888487	0.0656338	0	0.0234582	0.0499533	0.0719675	0.0491641	0.0400964	0.0877066	0.0591314	0.083949	0	0	0.0256709	0.0134838	0.0195595	0.0523975	0.0406267	0.00801195	0.00592548	0.0340703	0.0157501	0	0.050529	0.0113548	0.027407	0.0129745	0	0.0461266	0.0371902	0.111681
CISH	0.0197449	246	0.198916	0	0	0.0589047	0.108122	0.171188	0	0.198916	0.171151	0.0166931	0.0158179	0.0191761	0	0.00784829	0.0396189	0.02438	0.0184966	0	0	0.0239081	0.0590101	0	0.0901298	0.131898	0.0457771	0	0.0302841	0.0210214	0	0.0268094	0.048014	0.00932777	0.0231062	0	0.0319794	0.0211765	0.00302608	0.00750267	0	0.00900601	0.0637666	0	0	0.0604302	0	0.0444826	0
CNOT4	0.025975	200	0.158958	0	0.0249876	0.0103526	0.0408496	0	0	0.158958	0.0199997	0	0	0	0	0.0194163	0.0187698	0.0162996	0.0132823	0	0	0.0232438	0	0	0.0492597	0.0412672	0.0388989	0.0504856	0.0440103	0	0	0	0.0276174	0.0493495	0.0299075	0	0.00990015	0.0139975	0.0251229	0.02795	0.0391203	0.0322259	0.0276917	0.0369845	0.0466282	0.094753	0.0593361	0	0.130228
CPSF1	0.025711	204	0.121837	0	0.0312681	0.0177111	0	0.0547559	0	0	0.0241063	0	0.0152054	0.0203095	0	0.0259236	0.0244478	0.0135043	0.00864488	0	0	0.0236634	0	0.0687193	0.0186126	0	0	0	0.055697	0.0475651	0	0.031865	0.0403277	0.0584573	0.0652627	0.034199	0.0553991	0.0187219	0.029781	0.023422	0.0379085	0.0128304	0.00939031	0.0216818	0.0168003	0.121837	0.0039873	0	0
CRBN	0.135767	26	0.431391	0.0791708	0.0819971	0.191563	0.335256	0.123437	0	0.158958	0.342207	0.216779	0.138924	0.195183	0	0.178885	0.170465	0.208531	0.135691	0.1101	0.131773	0.151983	0.17852	0.0706106	0.240915	0.158891	0.431391	0	0.0322681	0.138597	0	0.100125	0.159252	0.136692	0.11683	0.094402	0.162622	0.277695	0.0822316	0.0763773	0.405718	0.211547	0.205853	0.132633	0.0842598	0.147921	0.185485	0.198972	0.119279
CUL9	0.00835834	360	0.0739184	0	0	0.0175187	0	0	0	0	0.0256751	0	0.016321	0	0	0.00885413	0.00954178	0.0211439	0	0	0	0.0211901	0	0	0.017522	0	0.039886	0.0529799	0.00967909	0.0310333	0	0.0143701	0	0.00901304	0.00750602	0	0	0.0125603	0.00548322	0.00301179	0	0	0.0359704	0	0	0	0.00958636	0.025471	0
DDB1	0.112607	35	0.438785	0.36826	0.0268149	0.105391	0.202309	0.16371	0.184978	0	0.0996313	0.117523	0.0191263	0.0984051	0	0.145555	0.0675412	0.0772201	0.0951433	0.0541207	0.0702641	0.0452809	0	0.150222	0.0498516	0.105294	0.161529	0	0.0444412	0.0504119	0	0.0592265	0.035381	0.116816	0.11722	0.119806	0.123481	0.147893	0.0861446	0.131598	0.316696	0.0743078	0.115232	0.120784	0.115844	0.332098	0.116149	0	0.16521
DTX1	0.0025029	433	0.0684159	0	0	0	0	0	0	0	0	0	0	0	0	0	0	0	0	0	0	0	0	0	0	0	0	0	0	0	0	0	0	0	0	0	0	0	0	0.000857815	0	0	0.0134705	0	0	0	0.0426855	0	0
DTX2	0.0133911	305	0.273133	0	0	0.0401858	0.0829687	0.0499753	0.175258	0	0.0244508	0	0.0715635	0	0	0.024349	0.0207333	0.017561	0.0286177	0.0787828	0	0	0	0	0.0193606	0.0745399	0	0	0.0167602	0.0291262	0.273133	0.0348491	0	0.00448566	0.0217057	0.0265514	0	0.0070609	0.00175611	0.00641808	0	0	0	0	0	0	0	0	0
DTX3	0.0102415	343	0.173087	0.173087	0	0.00745749	0.0217798	0	0	0	0.161768	0	0	0.0394126	0.124924	0	0.00153465	0	0.00444111	0	0	0	0.0252759	0	0.0320116	0	0	0.0561561	0	0	0	0	0.0269739	0	0	0	0	0	0.0134486	0.00799892	0	0	0.0243812	0.0137708	0	0	0	0	0
DTX3L	0.028433	185	0.712484	0.278306	0	0.0860899	0.128878	0.0776357	0	0	0.0631126	0	0.0366782	0	0	0.0172842	0.0226242	0.0211579	0.0427769	0	0	0.0239081	0	0.0808737	0.0320159	0.0410124	0.0397228	0	0.00625445	0	0	0.0292875	0	0.0470826	0.0550087	0.0710759	0.053255	0.0459396	0.00509524	0.00328681	0.143547	0.0641804	0.0148686	0.0101304	0	0	0.0447085	0	0.109778
DZIP3	0.012884	312	0.128449	0	0	0.00381639	0	0.0498358	0	0	0.0334881	0	0.0198123	0	0	0	0.00168845	0.00468881	0.00443426	0	0	0	0	0	0	0.0386349	0	0	0	0	0	0	0.0227409	0.0076249	0	0	0	0.0201146	0.0126688	0.0111789	0.0422046	0	0.0598977	0.0140254	0.0161032	0	0.0615177	0	0.128449
FANCL	0.0329992	163	0.223885	0	0.0172194	0.0259494	0.0145295	0.04841	0	0.139518	0.00983269	0	0.0199327	0	0.137964	0.0153825	0.0102315	0.0144382	0.00936485	0	0	0	0	0	0.00542792	0	0.0364278	0	0.0935485	0.156714	0	0.0341762	0.0601584	0.0815029	0.05355	0.0371727	0.0106437	0.165435	0.0323545	0.0371554	0.216102	0.0220773	0.138058	0.0305647	0.028561	0.223885	0.0546005	0	0
FBXL12	0.0617848	77	0.420835	0.2959	0	0.0514829	0.0669826	0	0.229065	0	0.0588781	0.0517315	0.0323873	0.0201093	0.125476	0.0512622	0.0461837	0.0940231	0.0444459	0.0650702	0	0.0437259	0.0252759	0.0751636	0.0686701	0	0.0800574	0	0.024754	0	0	0	0.0260479	0.012138	0	0	0.0130995	0.0388084	0.0844431	0.0780839	0.420835	0.131169	0.202428	0.0741067	0.0731855	0.156839	0.175485	0.0582656	0.239951
FBXL14	0	536.5	0	0	0	0	0	0	0	0	0	0	0	0	0	0	0	0	0	0	0	0	0	0	0	0	0	0	0	0	0	0	0	0	0	0	0	0	0	0	0	0	0	0	0	0	0	0	0
FBXL15	0.0536771	89	0.23374	0.208256	0.074841	0.169829	0.172916	0.168607	0.200358	0.178929	0.23374	0.0622924	0.0859722	0.0363928	0	0.0757252	0.0662932	0.0701387	0.0637017	0.0554014	0.0753067	0.0440788	0.145044	0.105394	0.0747955	0.158244	0.0898627	0.0935708	0.05834	0	0	0.0314459	0	0.01656	0.0335226	0.0289403	0.0343838	0.0495672	0.0241136	0.032331	0.0379085	0.0537	0.0388612	0.0602347	0.050723	0	0.054313	0	0
FBXL20	0.0124174	320	0.094224	0	0	0.00883489	0	0.041553	0	0	0.019063	0	0.0194778	0.0164338	0	0.0349155	0.0167003	0.0054978	0.0184022	0.0656338	0.0665326	0.0222623	0	0	0.0181677	0	0	0	0.0152129	0	0	0	0.012504	0.0200363	0.0375436	0	0.0338462	0.0479676	0.00263009	0.00346281	0	0.0237012	0.0476156	0	0.0176975	0	0.0210766	0.0234436	0
FBXL3	0.0408989	129	0.158742	0	0.0661801	0.0713494	0.0214716	0	0.0613242	0	0.0406012	0.0186697	0.082927	0.0212726	0	0.0556513	0.0429579	0.020762	0.0359043	0	0	0.0868508	0	0	0.0250446	0	0.158742	0	0.0244117	0	0	0.0717138	0.0546215	0.158477	0.117628	0.0305221	0.0545713	0.0528504	0.00291088	0.0097803	0.0552049	0.109057	0.0271842	0.018543	0.00978583	0	0.0327819	0.0642643	0
FBXL4	0.0188908	255	0.0903506	0	0	0	0	0	0	0	0	0.0175198	0	0	0	0.0228949	0.0149223	0.00444209	0.0188747	0	0	0	0.0322538	0	0.013027	0	0.040093	0	0.0184607	0.0600206	0	0.0170715	0	0.0469987	0.0133295	0	0.0348215	0.0272017	0.0158417	0.0186853	0	0.0392298	0.0468924	0.0245556	0.0132541	0.0390179	0.0290925	0.0903506	0
FBXL5	0.214664	10	0.751345	0.2959	0.0862003	0.567012	0.436818	0.287239	0.0673012	0.404084	0.224667	0.206853	0.277485	0.0970521	0	0.465832	0.526598	0.21031	0.435215	0.0559795	0.114127	0.267636	0.0879945	0.424733	0.155553	0.188361	0.205796	0.204809	0.0533985	0.124197	0	0.064385	0.145599	0.145672	0.381449	0.0706241	0.155227	0.107416	0.0832738	0.0907232	0.277549	0.633744	0.0995284	0.0737739	0.033855	0.161214	0.0744916	0.599484	0.130228
FBXL6	0.0040568	405	0.049164	0	0	0	0	0	0	0	0	0	0	0	0	0	0.00668719	0	0.00898212	0	0	0	0	0	0.00624984	0	0	0	0	0	0	0	0	0.00769148	0.00858121	0	0.00904664	0	0.00589973	0.00539565	0	0.0103657	0	0.00259426	0	0.0342486	0	0.0226898	0
FBXL7	0.000588393	472	0.0173797	0	0	0	0	0	0	0	0	0	0	0	0	0	0	0	0	0	0	0	0	0	0	0	0	0	0	0	0	0	0	0	0	0	0	0	0	0	0	0	0	0	0	0	0	0	0
FBXO11	0.0417183	123	0.178929	0	0.12812	0.0352295	0.0825451	0.0488437	0	0.178929	0.0735735	0.0186697	0.0389638	0.0392814	0	0.0761934	0.043661	0.0407399	0.0187056	0.0559795	0	0.0167995	0.0272789	0	0.0578188	0	0.0457771	0	0.0415099	0	0	0.0165134	0.04429	0.093692	0.0949587	0.106475	0.10804	0.0235424	0.0144219	0.0171898	0.104003	0.0563749	0	0.00448905	0.0046632	0	0.00531705	0.0632621	0.154598
FBXO17	0	536.5	0	0	0	0	0	0	0	0	0	0	0	0	0	0	0	0	0	0	0	0	0	0	0	0	0	0	0	0	0	0	0	0	0	0	0	0	0	0	0	0	0	0	0	0	0	0	0
FBXO18	0.0480034	101	0.163466	0	0.0624044	0.0536764	0.0180527	0.0560204	0.0781332	0	0.0547988	0.0154563	0.0358548	0.0217528	0.125476	0.00900746	0.0172813	0.0146947	0.0185296	0.127574	0	0.0626156	0.0267581	0.0330522	0.00543306	0	0.0464416	0	0.00824298	0	0	0.0159935	0.11803	0.0382606	0.0400244	0.0221454	0.0317887	0.0148517	0.0664452	0.0744743	0.0552049	0.0319308	0.0422784	0.0711775	0.114257	0.0281151	0.0422322	0.0610569	0
FBXO21	0.0189919	254	0.222385	0	0.0287743	0.0208338	0.0577456	0.0518922	0	0.222385	0.0469856	0.0152205	0.0165837	0.0432938	0	0.00910501	0.0190238	0.0149828	0.010194	0	0	0.0178474	0	0.0383305	0.0227982	0.0369129	0	0.0524902	0	0	0	0.0130933	0.0262779	0.0061755	0.00883092	0	0.0433416	0.0131787	0.0196601	0.0239159	0.0467598	0.00909306	0.021035	0.0311517	0.0134369	0	0.0103655	0	0
FBXO22	0.061331	78	0.340563	0.220296	0.0863751	0.0517282	0.0851693	0	0	0.127014	0.0868947	0.0183366	0.0596506	0.0621849	0	0.0730489	0.043023	0.0510138	0.0432703	0	0	0.0178275	0.0799967	0	0.0472412	0.0348563	0.0414117	0.105805	0.0249703	0.0356917	0	0.0446973	0.0495528	0.0619038	0.0902197	0.0910267	0.0503913	0.090868	0.0619607	0.093318	0.340563	0.104226	0.127214	0.0461957	0.0924063	0.114357	0.124147	0.0621598	0.110829
FBXO24	0.000159534	493	0.013166	0	0	0	0	0	0	0	0	0	0	0	0	0	0	0	0	0	0	0	0	0	0	0	0	0	0	0	0	0	0	0	0	0	0.013166	0	0	0	0	0	0	0	0	0	0	0	0
FBXO25	0.0473701	104	0.142117	0	0.0160652	0.0603954	0.114108	0.105602	0	0	0.103374	0.0742611	0	0.0559992	0.134672	0.0222554	0.0355531	0.0190934	0.0318191	0.0656338	0.142117	0.0859343	0.0472995	0.0330522	0.0501435	0.0802844	0	0.0632579	0.00933935	0.0862362	0	0.0135958	0.0476829	0.0136941	0	0.0686603	0.0229613	0.0535812	0.0813998	0.0652501	0.0921527	0.0367468	0.070889	0.0961599	0.0281608	0.0885453	0.0387561	0	0.0543811
FBXO28	0.026312	196	0.12833	0	0.0620589	0.0324818	0.0259229	0.0526313	0.0898878	0	0.0313127	0.0144631	0.0353326	0.0211692	0	0.0348605	0.0179164	0.00441321	0.00435241	0	0	0.0168558	0.0562231	0	0.0130836	0	0.0371648	0	0.0240537	0	0	0	0.033212	0.0488647	0.063939	0.0945241	0.0323087	0.0279411	0.01459	0.0223691	0	0.0233529	0.0492605	0.0220735	0.0128344	0.0743601	0.011657	0	0
FBXO3	0.0415762	125	0.177112	0	0.0859276	0.0640192	0	0	0	0.172822	0.0415182	0.0465034	0.0499368	0.0576646	0	0.0271848	0.0408559	0.0314192	0.0340989	0.0660301	0.0746598	0.0601281	0.0623372	0	0.0228862	0.0403057	0.0753246	0	0.0110469	0	0	0.0780221	0	0.0527701	0.0896416	0.0470551	0.0825111	0.0586844	0.0361674	0.0333367	0.0684865	0.0439097	0.0873647	0.033516	0.0262021	0.0592985	0.0209143	0	0
FBXO30	0.0210953	230	0.07577	0	0	0	0	0	0	0	0	0	0.0172253	0	0	0.0338272	0.0100452	0.025039	0.0129617	0	0	0	0	0.0372801	0.0373084	0	0	0.0389795	0.0232913	0	0	0.0121771	0	0.05606	0.0308877	0.07577	0.0516031	0.00753806	0.0109366	0.0123108	0	0.0383204	0.0263051	0.00357433	0.00709692	0.0417152	0.0107855	0.0377298	0
FBXO31	0.00275007	426	0.0259484	0	0	0	0	0	0	0	0	0	0	0	0	0	0.00473709	0	0	0	0	0	0	0	0.013412	0	0	0	0	0	0	0	0.0259484	0	0.00421515	0.0153122	0	0	0.00216988	0.00225265	0	0	0	0	0	0	0	0	0
FBXO32	0.0141977	297	0.0696553	0	0.0626908	0.0055993	0	0	0	0	0.0441598	0	0	0	0	0.0178974	0.00877339	0	0	0	0	0	0	0	0.0307277	0	0	0	0	0	0	0	0	0.00291794	0	0	0	0.00783001	0	0.00666144	0.0696553	0	0	0.0144869	0.0145448	0.0296051	0	0	0
FBXO33	0.0207939	232	0.0849516	0	0	0.0331142	0.0724872	0.0499753	0	0	0.0429195	0.0130627	0	0	0	0.00911672	0.0165749	0.0165667	0.0135684	0	0	0.0427846	0.0311659	0	0.0118896	0	0	0	0.0390139	0	0	0.0460357	0.0849516	0.0621601	0.0828695	0.0670149	0.0360472	0.057964	0.00164192	0.0103213	0.0709704	0.0216538	0.0190509	0	0.00405778	0.0417152	0	0	0
FBXO34	0.0262182	197	0.18128	0	0	0.0433446	0.0191034	0.0488437	0	0	0.0737946	0.0130384	0	0.0591289	0	0.0181685	0.0360725	0.0284303	0.0285167	0	0	0	0	0.0322716	0.0413413	0	0.18128	0	0.0244421	0	0	0.0292796	0	0.0398331	0.0285732	0	0.0352996	0.0435751	0.00752391	0.0101385	0	0.0293391	0.0184172	0.0167358	0	0	0.0219313	0.0359789	0
FBXO36	0.00255325	432	0.0626229	0	0	0	0	0	0	0	0	0	0	0	0	0.0063897	0.00158196	0.00463546	0	0	0	0.0228911	0	0	0	0	0	0	0	0	0	0	0	0.00462026	0.00311687	0	0	0	0.00257429	0.0022103	0	0	0	0	0	0.0342486	0	0	0
FBXO38	0.0275524	186	0.258471	0	0.0594383	0.0564659	0.0774233	0	0.086193	0	0	0	0.0648578	0.0197857	0.258471	0.0164389	0.0239815	0.0229477	0.0293281	0	0	0.0213137	0	0	0.0303569	0.0797956	0.0812719	0	0.0205619	0	0	0	0.0401081	0.0345798	0.0718784	0	0.0365425	0	0.0272746	0.0279988	0	0.0322299	0.0179817	0.0159596	0.0361555	0.0303329	0.0228982	0.0448542	0
FBXO4	0.0376361	141	0.328116	0.294158	0.0265054	0.0187565	0.0195265	0.104689	0.076245	0	0.034084	0.013866	0	0.0182601	0	0.00857159	0.0159498	0.0204087	0.00853388	0	0	0.0178474	0	0.0322397	0.012971	0	0	0.0572952	0.0156764	0.0269339	0	0.024678	0.0219773	0.0254887	0	0.0252427	0.0478638	0.0580702	0.0657787	0.0621718	0.0950884	0.0211131	0.0888157	0.0837365	0.0689087	0.167441	0.050885	0	0.328116
FBXO41	0.00569628	388	0.154918	0	0	0	0	0	0	0	0	0.0188257	0	0.0218502	0	0.0181308	0.011103	0.00516844	0.00523034	0	0.154918	0.0168898	0	0	0.00643234	0	0	0	0	0	0	0	0.0276713	0.0022393	0.00565206	0.0748618	0	0.00686806	0.00489191	0.00389354	0	0	0	0	0	0	0	0	0
FBXO42	0.0208355	231	0.14032	0	0	0.0284646	0.0274923	0	0.0848021	0.139518	0.0115662	0	0.0345731	0.0220667	0.14032	0.0361339	0.0252651	0.0149204	0.023275	0	0.0738576	0.0433097	0.0290706	0.067792	0.0128864	0	0.0798666	0	0.0493857	0	0	0.0152806	0.0243365	0.0268679	0.0312605	0.0740521	0.00856048	0.0212113	0.0124604	0.0145499	0.101394	0	0.0115442	0.0133101	0.0427573	0	0.0131052	0.0226798	0
FBXO44	0.0188728	256	0.400387	0.107588	0.0313823	0.0493352	0	0.0456856	0	0	0.166643	0.0334319	0.0200419	0.0189183	0.400387	0.0153218	0.00904802	0.0294188	0.00472674	0	0.0798564	0	0.0296827	0	0.0491788	0.0742846	0	0.0974336	0	0	0.328987	0	0.0213085	0	0	0	0	0	0.0207519	0.0226963	0	0.00801172	0.0299874	0.00327768	0.0482106	0	0.0181979	0.0205483	0
FBXO45	0.00945453	349	0.0776902	0	0	0	0	0	0	0	0	0.0145717	0.0145688	0	0	0	0.0142036	0.00555855	0.0144538	0	0	0	0	0	0.00655681	0.0369129	0	0	0.0163293	0	0	0.0451492	0.0134838	0.0252999	0.035202	0	0.0501323	0.0111317	0	0.00240752	0	0.0237757	0	0.00433683	0.0108532	0.0776902	0.00588688	0	0
FBXO46	0.00729833	371	0.0888455	0	0	0	0	0	0	0	0	0	0	0	0	0	0.00668205	0	0.00451392	0.0703641	0	0	0.0888455	0	0	0	0.034814	0	0.0111413	0	0	0.0151329	0.0253227	0.0130656	0.0407574	0	0	0	0.00620378	0.0114448	0	0.0104309	0	0.00856193	0.00442857	0	0	0	0
FBXO6	0.0469153	106	0.150954	0	0.033054	0.137233	0.106323	0.0975655	0.117677	0	0.150954	0.133447	0.130974	0.0188182	0	0.0884663	0.0640717	0.087964	0.0544441	0	0	0.042635	0.0278464	0.0352932	0.0798267	0.0737263	0.121471	0	0.00783887	0	0	0	0.0354611	0.0151279	0.0467952	0	0.0303264	0.011983	0.0288692	0.03475	0.03815	0.0838935	0.0501451	0.0384843	0.0115358	0	0.0433406	0.0672695	0
FBXO7	0.161883	18	1.45235	0.103581	0.292985	0.193982	0.183753	0.408907	0.234784	0.139518	0.206079	0.0944404	0.0693962	0.0915959	0.118678	0.142154	0.130002	0.177702	0.142852	0.0541207	0.452771	0.120465	0.176527	0.0718548	0.146993	0.142589	0.494242	0	0.0597201	0.201669	0	0.176479	0.0901346	0.169381	0.213942	0.24542	0.216667	0.29682	0.0929386	0.137931	1.05549	0.123225	0.192867	0.110961	0.0976157	0.397585	0.12192	0.135223	0.100216
FBXO8	0.0309187	176	0.273133	0	0.0160652	0.0333362	0.0173113	0.0495294	0.157288	0	0.0270786	0.0187773	0.0199327	0	0	0.0315432	0.0273205	0.0195298	0.0243267	0.0671962	0	0.0227005	0.0939171	0.0355742	0.0361305	0.129389	0	0.0632579	0.0103081	0	0.273133	0.0483447	0.0492008	0.016388	0.00562674	0.13419	0.0188879	0	0.0397485	0.029522	0.0379085	0.0141078	0.0465939	0.0433658	0.052592	0.0583092	0.0688005	0.0227699	0.128449
FBXO9	0.0670415	67	0.496723	0.225404	0.142758	0.114216	0.0447346	0.100704	0	0.178929	0.0349337	0.0175198	0.0379224	0.0195232	0.122086	0.0479731	0.0503337	0.031889	0.036575	0	0	0.0347629	0	0.0734896	0.0236137	0.11727	0.0462052	0	0.320639	0.148522	0	0.178839	0	0.496723	0.430841	0.0990766	0.0741478	0.0199575	0.0353373	0.0210967	0	0.0856267	0.0129251	0.0183034	0.0119631	0	0.0364275	0.0422933	0
FBXW11	0.04865	98	0.304486	0	0.106583	0.0257836	0.105943	0.0595045	0.141862	0	0.0788695	0.0478579	0	0	0.136102	0.0266099	0.0342773	0.0333363	0.0362172	0.0872956	0.0642576	0.0653171	0.0362909	0.0693811	0.038961	0	0.0731872	0.0572952	0.0244097	0	0.304486	0.0342454	0.0667182	0.0702198	0.0593316	0.0601625	0.0558208	0.0145589	0.0345972	0.0517704	0.107652	0.070264	0.0347748	0.0444337	0.0595536	0.0296051	0.0630368	0.0676257	0
FBXW2	0.0872896	46	0.39746	0.39746	0.121836	0.136195	0.179419	0.195766	0.0672591	0.324608	0.137787	0.0936335	0.0508101	0.145247	0.118678	0.132089	0.135672	0.0934205	0.10072	0	0.0674569	0.0632646	0.0628596	0.179667	0.144995	0.0794421	0.219979	0	0.0955158	0.147567	0	0.111893	0.0271768	0.114188	0.175153	0.149909	0.032108	0.0278303	0.0411377	0.0431169	0.25152	0.146341	0.0984136	0.0647344	0.0464688	0.0342486	0.0877155	0.135218	0
FBXW4	0.0092194	352	0.0765457	0	0	0.0195962	0.0326175	0	0	0	0.0127016	0	0	0.0438195	0	0	0.00830314	0.00462578	0.00430177	0	0	0.0225422	0	0	0.0123088	0.0343085	0.0349371	0	0.0115834	0	0	0	0.0260388	0.0216935	0.00294043	0	0.0330353	0	0.0054808	0.0128705	0	0	0.0200337	0.00871822	0.00603516	0.0765457	0.00989288	0	0
FBXW5	0.0705283	62	0.277447	0.22838	0.234504	0.203208	0.0888914	0.0494764	0.277447	0	0.197593	0.0517399	0.0726109	0.079287	0.118678	0.0927815	0.0858922	0.0838551	0.0572175	0	0.0756367	0.0915434	0.0866475	0.0640893	0.147455	0.234538	0	0.0576539	0.169284	0.0883428	0	0.155071	0.0651386	0.071793	0.0974965	0.0769808	0.0563678	0.0154547	0.05053	0.0391389	0.0920316	0.00909306	0.0364252	0.0466231	0.0303538	0.124512	0.0546527	0	0.201125
FBXW7	0.0618025	76	0.432525	0.121071	0.148833	0.0978381	0.112083	0.0547559	0	0.172291	0.0695045	0.0915871	0.0609817	0.105159	0.258326	0.0518533	0.0502435	0.048941	0.0248301	0.432525	0.137789	0.109434	0.0311659	0.101779	0.0948746	0	0.0439079	0.243883	0.029918	0.240863	0	0.0398671	0.202496	0.0777205	0.0442575	0.0356776	0.0114918	0	0.0813313	0.0593011	0	0.0263771	0.0398756	0.04902	0.0543391	0	0.00997315	0.0368165	0
FBXW8	0.00770316	366	0.0641981	0	0	0	0	0	0	0	0	0	0	0	0	0	0.00375091	0	0.00484633	0	0	0.0246801	0	0	0	0	0.0442206	0	0	0	0	0	0.0283076	0	0	0	0	0	0.00512691	0.0170272	0	0	0	0.0180384	0.0207166	0	0	0	0
G2E3	0.030713	179	0.160197	0	0	0.0148491	0.0373068	0.0786009	0	0	0.0215414	0	0	0.0636495	0	0.00940111	0.010029	0.0150605	0.0237253	0.0559795	0	0	0	0.0347322	0.00664964	0.0392944	0	0	0.0396938	0	0	0.028534	0.0271359	0.059439	0.0791498	0.0278045	0.0661715	0.0704622	0.0362347	0.0369497	0.131692	0.160197	0.0341123	0.0288707	0.0466657	0	0.0515044	0	0
GAN	0.00533272	391	0.115443	0	0	0	0	0	0	0	0	0	0	0	0	0	0.00824481	0.00498404	0.0100259	0	0	0	0	0	0.0131142	0	0.0465786	0	0	0	0	0	0	0.0079866	0.00369431	0.0272356	0.0245972	0	0.00269985	0.00465138	0	0	0.0298352	0	0	0.0399661	0	0	0
GMCL1	0.0402237	132	0.459005	0.459005	0.152388	0.0582769	0.0651542	0	0	0.18509	0.0598591	0	0.0193297	0	0	0.0364291	0.0278269	0.0375314	0.018779	0	0.0549979	0.0677954	0.0267581	0.110103	0.0517059	0	0.0909113	0	0.0738169	0.109599	0	0.0812253	0.0817873	0.0965428	0.158885	0.0385891	0.0850608	0.046675	0.0102674	0.0328763	0.0422046	0.0944315	0.018353	0.0182538	0.0164362	0.0437915	0.0370127	0.0354688	0.145688
GTF2H2	0.0174315	267	0.084448	0	0	0	0	0	0	0	0	0	0.016539	0	0	0	0.00291902	0.00418694	0	0.0787828	0.0654989	0	0	0	0.0123688	0	0	0.0606369	0	0.0307775	0	0	0.012504	0.0329952	0.0196822	0.0354319	0	0.0226399	0.0255035	0.0372177	0	0.0517522	0.0134757	0.0264664	0.0210016	0.0342486	0.0304916	0.024986	0
GZF1	0.0145644	289	0.0710217	0	0	0	0	0	0	0	0	0.018924	0	0	0	0	0.0134263	0	0	0	0	0.0196567	0	0	0.0191191	0	0	0.0544637	0.0112647	0	0	0.0135081	0	0	0	0	0	0	0.0126222	0.0209484	0	0.0331437	0.011268	0.0171936	0.0293436	0	0.0230098	0	0
HACE1	0.00553479	389	0.0746705	0	0	0	0	0	0	0	0	0	0	0	0	0	0.00433319	0	0	0	0	0	0	0	0.012528	0	0.0746705	0	0	0	0	0.0112494	0	0.0247076	0.0196648	0	0	0	0	0.00241599	0	0.0463054	0	0.00493842	0.00668908	0	0	0	0
HECTD1	0.038833	135	0.177002	0	0.0317535	0.0305008	0.0432379	0	0	0	0.0252942	0.0539845	0	0	0	0.02473	0.0300685	0.020898	0.0375964	0	0	0.0224075	0.0605544	0.0352082	0.0312	0.0432204	0	0.105344	0.0264409	0	0	0	0.0675894	0.114931	0.125504	0.0612392	0.0272542	0.0744436	0.0118194	0.0280798	0.0379085	0.0234063	0	0.0349235	0.0182232	0.0388405	0.04205	0.0234326	0
HECTD2	0.00259446	431	0.0397137	0	0	0	0	0	0	0	0	0	0	0	0	0	0.00174126	0	0	0	0	0	0	0	0.00697108	0.0397137	0	0	0	0	0	0	0	0	0	0	0	0	0.00164192	0.00201479	0	0	0.00626973	0	0	0	0.00353927	0	0
HECTD3	0.0205709	234	0.145783	0	0.0632668	0.0488268	0.0123175	0.0401164	0.0565328	0.139518	0.0765314	0.0163577	0.0389402	0.0421217	0	0.0158079	0.0256049	0.0214772	0.00914338	0	0.088698	0.0402802	0.0294295	0.0353146	0.0257713	0.0398145	0	0	0.0272329	0	0	0.0526291	0.0363553	0.0357855	0.0453091	0	0	0.0210141	0.0107235	0.00662957	0.0391203	0.0115388	0	0.0174394	0.00544274	0	0	0	0.145783
HECTD4	0.0142162	296	0.088913	0	0	0	0	0	0	0	0	0	0.0352693	0.0209816	0	0	0.0108028	0.0105664	0.0129075	0	0	0	0.088913	0.0356622	0.00657597	0.0335779	0	0.0713105	0.0439859	0.0254838	0	0.0130983	0	0.0181624	0.0610149	0.0353972	0.0125614	0.00874759	0.0113247	0.0114651	0.0788599	0.00779432	0.0205578	0	0.0154626	0.0387015	0.0112859	0	0.0543811
HERC1	0.0291446	183	0.363355	0	0.0504128	0.0264147	0.038613	0	0	0	0.033435	0.0505168	0.0199598	0.0162465	0.125476	0.0182889	0.0384677	0.0258296	0.0181893	0	0.0541916	0.0822414	0	0.0340847	0.0440488	0.0359651	0.0809269	0	0.0467127	0.0375274	0.363355	0.0128614	0.0456947	0.0419391	0.0646708	0.0348563	0.0106523	0.0187656	0.0169342	0.0148863	0.0570497	0.0100175	0.00939031	0.0141316	0.00489944	0	0	0.0484848	0.0913068
HERC2	0.0541647	87	0.327646	0	0.112729	0.0267309	0	0.0749192	0	0.172291	0.0237855	0.0187172	0	0.0402936	0	0	0.0127345	0	0.00955935	0	0.0848895	0.0409205	0	0	0.013129	0	0.0335131	0	0.0184865	0	0	0.0156837	0.0612424	0.0264015	0.0154609	0	0.0240764	0.0310689	0.0810987	0.103565	0.327646	0.0574371	0.0481685	0.0900499	0.0592615	0.0281151	0.0683741	0.0244411	0
HERC3	0.0202936	237	0.200015	0.103581	0	0.0031519	0	0.0372365	0	0	0.0213008	0	0.058632	0	0.128284	0.0352143	0.0175344	0.00882554	0.018137	0.0752486	0	0.0194228	0.03083	0	0.00586477	0	0	0.0466439	0.0291386	0	0	0	0	0.039425	0.0236305	0	0.0211275	0.0280779	0.0299151	0.0191048	0.200015	0.0585408	0.0121636	0.0229426	0.0154771	0.0595646	0	0	0
HERC4	0.0434174	117	0.328987	0.121823	0.0605906	0.0669778	0	0.198954	0.0673012	0.128164	0.0779386	0.051372	0.0192691	0.102442	0.137396	0.0415903	0.0652748	0.0599101	0.0416186	0.0671962	0	0.088541	0.0631033	0.0341037	0.0485787	0.151631	0.0861397	0.0529368	0.0160055	0.0276067	0.328987	0.0483515	0.0426381	0.0696111	0.0935592	0.0768639	0.0589647	0.0598672	0.021739	0.0145789	0.0422046	0.0705004	0.0824323	0.0314347	0.0274298	0.0983164	0.0229351	0.0654065	0.219037
HERC5	0.0164836	275	0.197465	0	0.0334028	0.0810693	0.0926622	0	0.197465	0.186327	0.0546717	0	0.0194404	0.0216569	0	0.163958	0.00925859	0	0.00469355	0	0	0.0222102	0	0.0364407	0.00580359	0	0.0796533	0	0	0	0	0.0121771	0	0.00773938	0.0228961	0.0717477	0.0408931	0.019474	0	0.00904372	0	0	0	0.0129756	0	0	0	0	0
HIC1	0.00300072	420	0.0663464	0	0	0	0	0	0	0	0	0.036801	0.0534393	0	0	0	0	0	0.0048222	0	0	0	0.0230893	0	0	0	0	0	0.0213836	0.0246431	0	0	0	0	0	0	0	0	0	0	0	0	0	0	0	0	0	0	0
HLTF	0.0253225	208	0.140665	0	0	0	0	0	0	0	0	0.0137856	0	0	0	0	0.00141796	0.00518754	0.00484633	0	0	0	0	0	0.0385834	0	0	0	0	0.0327767	0	0	0.0394318	0.0356162	0.0204413	0	0.00909054	0.0447929	0.0390115	0.0383612	0.0973397	0.00841144	0.0415538	0.0331776	0.0509529	0.116392	0.0440708	0.0210822	0
HUWE1	0.0377023	140	0.220296	0.220296	0.0250446	0.0310066	0.11162	0.047464	0	0	0.0204202	0.0542855	0.0762542	0.0398415	0	0.0554142	0.0158005	0.0273235	0.0233456	0	0	0.0474414	0.0299431	0	0.0187038	0.108539	0	0.0572952	0.0539798	0.060901	0	0.0270793	0.0279675	0.0990812	0.056695	0.0317111	0.040931	0.0522619	0.0167715	0.0184718	0.165963	0.0403489	0.030537	0.0285774	0.0193487	0.069303	0.0545714	0.0244161	0.0543811
IBTK	0.0364911	151	0.363355	0	0.0817057	0.0309169	0.0246205	0	0	0	0.0207768	0.0174625	0.0916987	0	0	0.0530653	0.0223688	0.0373604	0.0337295	0	0	0	0	0.0375662	0.022502	0	0	0.0529799	0.0238895	0	0.363355	0.0557526	0.0927082	0.0738931	0.0334108	0.108691	0.0480591	0.0580563	0.0398863	0.0378917	0.0654476	0.0420692	0.0289854	0.0363355	0.0297959	0	0.0146735	0	0
IRF2BPL	0.0131131	308	0.206282	0	0.0341922	0.0298453	0.0415755	0.0456856	0.206282	0	0.033581	0.018472	0.0580533	0	0	0.0167984	0.00853064	0.00530708	0.018419	0	0	0.0239749	0.0273843	0	0.0242342	0	0	0	0	0	0	0	0	0.0160822	0	0.0424385	0	0	0.00289485	0.0043249	0	0	0	0.00429478	0	0	0.0111259	0.0178521	0
ITCH	0.0205478	235	0.114265	0	0	0.0169963	0	0	0	0	0.0155081	0.0406093	0.0190794	0	0	0.00858599	0.0186904	0.014832	0.0242775	0	0	0.0406742	0	0.0379144	0.0253408	0.0420047	0.0335131	0.059995	0	0	0	0	0.0295105	0.016953	0.0227338	0.0928639	0.0116523	0	0.0273685	0.0271221	0	0.0337708	0.0212871	0.0183758	0.0361208	0.0604302	0.00593121	0	0.0913068
IVNS1ABP	0.169023	17	0.917239	0.345284	0.152395	0.177496	0.0706927	0.126291	0.086193	0.27592	0.323358	0.20214	0.0193176	0.133125	0	0.0918072	0.148566	0.188245	0.132563	0.271215	0.0754528	0.133232	0.182699	0.0347322	0.19146	0.201534	0.0707372	0.196302	0.222039	0.25812	0.288547	0.409555	0.0594721	0.26676	0.514102	0.215372	0.247103	0.142234	0.0688959	0.0764038	0.382282	0.407639	0.0731475	0.0816651	0.0624454	0.389878	0.104655	0.422882	0.190083
KBTBD2	0.0475423	102	0.344884	0	0.0631771	0.0471872	0	0.120249	0.0792806	0	0.0945344	0	0.0194156	0.0191341	0	0.0631849	0.0335301	0.0428276	0.0281356	0.0671962	0.15362	0.0856657	0	0.0675545	0.0251271	0	0.0810052	0	0.0370726	0	0	0.0614353	0.0134838	0.060291	0.0788975	0.0359107	0.00892878	0.0305296	0.0134181	0.0289918	0.0499026	0.072281	0.0112205	0.0327244	0.0105222	0.0618494	0.0223504	0.0431599	0
KBTBD3	0.0431395	118	0.288547	0.15077	0.0332152	0.0689958	0.0358875	0.082096	0	0	0.055141	0.0198226	0.0202239	0.0542473	0	0.00975556	0.0479312	0.0357268	0.0475104	0	0	0.0184901	0.0548487	0	0.0635497	0.122482	0.0464076	0	0.0178717	0	0.288547	0.0107004	0.0535388	0.0358212	0.0282893	0	0.0425386	0.0620935	0.0528472	0.053035	0.0646872	0.0319006	0.128253	0.035054	0.0800972	0.0683943	0.062636	0.0465323	0.225143
KBTBD4	0.0222987	226	0.214922	0	0.0265054	0.0239376	0	0.109037	0	0	0.0199066	0	0.0201955	0	0	0	0.0147465	0.0165103	0.0228287	0	0.0549979	0.0168898	0.0304873	0	0.0514403	0	0.0377914	0	0.0392513	0.0672005	0	0	0.0523114	0.020491	0.0178086	0.0643277	0.0419481	0.00617995	0.0147384	0.0196412	0.128214	0.0254998	0.103207	0.00660041	0.0341616	0.0862417	0.0123156	0	0
KBTBD6	0.0134737	303	0.273133	0	0	0	0	0	0	0	0	0	0.0195533	0.0213778	0	0.00957607	0.0105834	0.00577084	0.00447587	0	0	0	0	0	0.0196771	0	0	0	0.0116272	0	0.273133	0	0.0429026	0.0640267	0.158698	0.0485849	0	0.00656605	0.00260366	0.00795892	0.107652	0.00815475	0	0.0096274	0.00533758	0.0281151	0.0115867	0.0226898	0.130228
KBTBD7	0.0367724	147	0.491252	0	0.0394803	0.0283266	0	0	0	0.128164	0.0340977	0	0	0.0207584	0	0.046119	0.0332099	0.014121	0.0389731	0	0	0.0227075	0	0	0.0227871	0.0348563	0	0	0.0370157	0.0351984	0.288547	0.113948	0.0299377	0.150441	0.385206	0.0752959	0.0290245	0.0187052	0.00286062	0.0117703	0	0.10936	0	0.0134325	0.011256	0	0.0309667	0.231272	0
KBTBD8	0.0121554	323	0.0907409	0	0	0	0	0	0	0	0	0	0	0	0	0	0	0.0201944	0	0	0	0	0	0	0	0	0	0	0	0	0	0	0.0358614	0.00482046	0	0	0	0.0379415	0.00821174	0.0107846	0	0	0.0449387	0.00801054	0.018191	0	0.0169126	0	0
KCNB1	0	536.5	0	0	0	0	0	0	0	0	0	0	0	0	0	0	0	0	0	0	0	0	0	0	0	0	0	0	0	0	0	0	0	0	0	0	0	0	0	0	0	0	0	0	0	0	0	0	0
KCNC4	0.00119274	452	0.0389942	0	0	0	0	0	0	0	0	0	0	0	0	0	0	0	0	0	0	0	0	0	0	0	0.0389942	0	0.0125663	0	0	0.0152334	0	0.00437212	0.0121554	0	0	0	0	0.00115578	0	0	0	0	0	0	0	0	0
KCND3	0.000950117	459	0.0209852	0	0	0	0	0	0	0	0	0	0	0	0	0	0	0	0	0	0	0	0	0	0	0	0	0	0	0	0	0	0	0	0	0	0	0	0	0	0	0	0	0	0	0	0	0	0
KCTD10	0.0268168	191	0.137048	0	0.0265054	0.0521184	0.0765662	0.137048	0	0	0.13093	0.049742	0.0725745	0.0420745	0	0.0161708	0.0159793	0.0354046	0.0403781	0	0	0.0216748	0	0.0702626	0.0377114	0	0.0355433	0.0389795	0.0172224	0.126299	0	0.0118577	0.0218972	0.0157466	0.0262465	0	0.02467	0.0320771	0.00955842	0.0202808	0.0540027	0.0303388	0.0131385	0.0327774	0.00753241	0	0.0154602	0	0
KCTD12	0.169983	16	1.16942	0	0.114897	0.80013	0.270113	1.16942	0.516449	0.319609	0.0361329	0.508185	0.182051	0.0825357	0.125476	0.452623	0.562116	0.425925	0.503725	0	0.491172	0.436095	0.123642	0.375373	0.0303702	0.253259	0.155172	0	0.0398078	0.0276067	0	0.0991969	0.0491407	0.0643313	0.175841	0.236838	0.337875	0.0148098	0.00549188	0.00225141	0	0.046862	0.0134705	0.00337267	0.00628824	0	0.0183233	0.0580696	0
KCTD13	0.0119669	325	0.107588	0.107588	0.0564235	0.0230077	0.0282866	0	0.0613242	0	0.0328182	0.0154563	0.0158179	0.0796576	0	0.0217568	0.0151365	0	0.0234561	0	0	0.0222102	0.0299079	0	0.0334094	0	0	0	0	0	0	0.0136626	0	0.0130689	0.0117955	0	0	0	0.00302608	0.00266342	0	0.0103657	0.0305507	0.00378978	0	0	0.0195313	0	0
KCTD2	0.00904311	353	0.102823	0	0	0	0	0	0	0	0	0	0.0193176	0	0	0.0175466	0.00836846	0	0.00929583	0	0	0	0	0	0	0	0	0	0	0	0	0.0140121	0.0253227	0.0197402	0.0305727	0	0.0117963	0.00752323	0.00661551	0.00122977	0	0.0119777	0.0152849	0.00856766	0.00442857	0	0	0.0234546	0
KCTD20	0.0629538	74	0.211605	0	0.0172194	0.102613	0.0580857	0.0447314	0.0611442	0	0.057193	0	0.0178185	0.0609837	0	0.0380564	0.0788426	0.0353207	0.045863	0.0559795	0.079465	0.0855848	0.0890838	0.105871	0.0312162	0.115114	0.034814	0	0.0189633	0	0	0.0251296	0	0.0894594	0.0589065	0.0987203	0.023433	0.0552513	0.0367118	0.0449915	0.178558	0.0753446	0.0136081	0.0774827	0.05657	0.211605	0.0441028	0.0695765	0.176827
KCTD21	0.00450675	398	0.0634746	0	0	0	0	0	0	0	0	0	0	0	0	0.00894618	0.0155027	0.00480559	0.0141514	0	0	0	0.0530143	0	0	0	0	0.0389795	0.00906945	0	0	0	0.0259484	0	0.0148531	0	0	0	0.00175611	0.0030547	0.0634746	0.0122481	0	0	0.00672587	0	0.00566765	0	0
KCTD3	0.00701396	375	0.0696244	0	0	0	0	0	0	0	0	0	0	0	0	0	0.00610801	0	0.00488954	0	0	0	0	0	0	0	0	0	0.0183631	0	0	0	0	0.0263443	0.00294043	0.067715	0.0178117	0.0331411	0.00332293	0.00369487	0.0392545	0	0	0.00802124	0	0	0	0	0
KCTD5	0.0451298	110	0.497342	0.188123	0.0886011	0.0738784	0.129402	0.238975	0.497342	0	0.124269	0.062257	0.0180668	0.0219825	0	0.0421681	0.038665	0.0526272	0.0474349	0	0	0.0835487	0.109888	0.102446	0.0384375	0.0410124	0	0	0.013004	0.0692026	0	0.0269421	0	0.00896932	0.027812	0.137764	0.0125614	0.0242063	0.0340258	0.0314822	0.0634746	0.0658712	0.0120477	0.0404929	0.0184773	0.0989994	0.0869764	0.0368544	0.0766104
KCTD6	0.022894	224	0.117474	0	0.033498	0.0544221	0.0632216	0.117474	0.0582649	0	0.0242406	0.0150792	0.0756115	0	0	0.0494452	0.0458218	0.0456089	0.0220029	0	0.0848895	0.0169354	0.0544999	0.030552	0.0265631	0.0421271	0	0	0.0215936	0	0	0	0	0.0271706	0.00690972	0	0.0211527	0.0217503	0.0150813	0.0132724	0	0.0349373	0.0110598	0.00834604	0.0148369	0	0.0417171	0	0
KCTD7	0.0112808	331	0.156441	0.112618	0.0274805	0.018988	0.0640599	0	0	0	0.0827093	0.0330421	0.016907	0.0220837	0.14032	0.0349556	0.0193904	0.0215629	0.0238062	0	0.156441	0	0	0.0675648	0.0374444	0.0385891	0.0716639	0	0.00686234	0.0332591	0	0	0	0.0204982	0.0178779	0.032837	0	0.00547071	0	0	0	0	0.0176045	0	0	0	0	0	0
KCTD9	0.0175193	265	0.491252	0	0	0	0	0	0	0	0	0.019443	0	0.0182601	0	0.00911086	0.00304301	0	0.0103749	0	0	0.0189474	0	0	0.0187479	0	0.042856	0	0	0.121183	0	0.0141783	0	0.0278455	0.0482248	0	0.0350364	0.0144878	0.0135931	0.0150033	0	0.0824686	0.0293513	0.00740821	0.0255391	0.0686112	0.0122136	0.0413296	0
KDM2A	0.0486694	97	0.133776	0	0.0678202	0.0398262	0.0864032	0.0848246	0	0.128164	0.0725721	0.105103	0.0538758	0	0	0.061022	0.0419176	0.0504235	0.0654918	0	0.133776	0.0203936	0.117318	0.133398	0.0702948	0.0436312	0.117972	0	0.0206206	0	0	0.0634164	0.0284588	0.0728646	0.062129	0.106328	0.068533	0.0211278	0.0166454	0.0275182	0.0379085	0.0691232	0.0615629	0	0.0202761	0.116558	0.0271866	0.113934	0.0914018
KDM2B	0.0195023	249	0.158143	0	0.054463	0.0388054	0.0248631	0.158143	0	0	0.0202889	0.0656021	0.0203678	0.0192931	0.136102	0.0333165	0.0262283	0.0261538	0.0286106	0	0.143683	0	0	0.0355742	0.0068671	0	0.0289258	0	0.0195299	0	0	0.0132394	0.0420733	0.032614	0.0410735	0.0969354	0.0672303	0.0436066	0.00526734	0.00923641	0.0588393	0	0.0383638	0.00453645	0.00513724	0.0342486	0.0381602	0	0
KEAP1	0.0558086	84	0.761294	0.761294	0.0582192	0.0806304	0.0708026	0.138375	0	0	0.0864916	0.0538522	0.056902	0.0210531	0	0.0646577	0.058097	0.0862371	0.0642184	0	0.0654989	0.0469642	0	0.132261	0.0588766	0.0791372	0.0827004	0.108665	0.0117317	0.0342667	0	0.0298584	0.0736175	0.0397594	0.0532787	0.0841422	0.0212744	0.0771921	0.0505041	0.0574749	0.250354	0.0179471	0.107427	0.0384374	0.0360114	0.0342486	0.068529	0	0
KLHL12	0.0317386	169	0.328987	0	0.033498	0.045203	0.0470297	0	0	0.127014	0.0394541	0.0130627	0.0289959	0.0576973	0.136102	0.0331082	0.0368369	0.0428853	0.0356728	0	0.154571	0	0.0629333	0	0.00457192	0.0766156	0.128916	0	0	0.0315977	0.328987	0.0135136	0.0160361	0.0420059	0.0416867	0.0836719	0.0187497	0.070962	0.0166749	0.0200397	0	0.0655462	0.0345543	0.0319636	0.0116374	0.0448253	0.032293	0	0
KLHL15	0.0107958	337	0.0606192	0	0	0	0	0	0	0	0	0.0169722	0.0153759	0	0	0	0.00317215	0	0	0	0	0.016822	0	0	0.0125132	0	0	0	0	0	0	0	0	0.00967731	0.0191615	0	0	0.00617581	0.00292308	0.00283701	0	0	0	0	0.00555985	0	0	0.0479982	0
KLHL17	0.000295848	488	0.00769945	0	0	0	0	0	0	0	0	0	0	0	0	0	0	0	0	0	0	0	0	0	0	0	0	0	0	0	0	0	0	0.00498101	0	0	0	0.00769945	0	0	0	0	0	0	0	0	0	0	0
KLHL18	0.0393182	134	0.273133	0.121071	0.0313823	0.0345084	0.0336774	0	0	0.156167	0.012721	0.0199849	0.0201814	0.020855	0	0.0320383	0.0565123	0.0342326	0.0600844	0.130018	0	0.023744	0.0916471	0.0326962	0.0249023	0.0284434	0.0835397	0.0524902	0.0294958	0	0.273133	0.0769752	0	0.0410465	0.0876709	0.0727117	0.053372	0.0262847	0.0111323	0.0256088	0.0984442	0.0881859	0.0209143	0.0221312	0.00663177	0.0669043	0.0664267	0.0490171	0
KLHL20	0.0263201	195	0.197136	0	0.0306279	0.0152739	0	0	0	0	0.067904	0	0.0656122	0.0194565	0	0.0155213	0.0131465	0.0147665	0.00947916	0	0.0802095	0	0	0	0.061921	0	0	0	0.0280356	0	0	0	0.0276713	0.0316156	0.0203501	0	0.0218306	0.0287499	0.0228388	0.027597	0.0711013	0.0143027	0.0347234	0.0387305	0.0201665	0.0448253	0	0	0
KLHL21	0.0152661	281	0.140523	0	0.0334028	0.0285235	0.0222235	0.0892366	0.0792806	0	0.0120884	0.0355429	0.0203387	0	0.140523	0.00809561	0.0198118	0.00461616	0.00875937	0	0	0.046967	0	0.0334926	0.00565769	0.0385891	0	0	0.0210745	0.0315173	0	0.0130538	0	0.041382	0.0313084	0.0204013	0	0.00798126	0.00203729	0.00314888	0	0.0228185	0.0141003	0.004168	0.00938587	0	0.0143564	0.021658	0.111681
KLHL22	0.0261674	198	0.435922	0	0.0313823	0.087862	0.0790715	0.115491	0.293305	0	0.0637183	0.0352903	0.0566027	0.090938	0	0.0452966	0.0441962	0.121147	0.0486729	0	0.435922	0.110489	0.0245775	0	0.018965	0.117148	0	0	0.0479456	0	0	0.0397972	0.0401214	0.039414	0.0452484	0.0709436	0.0273057	0.0149361	0.00548839	0.00759873	0	0.0096613	0	0.00850846	0.00820386	0	0	0	0
KLHL24	0.0337611	157	0.165331	0	0.0279974	0.0253396	0	0	0	0.165331	0	0	0.0359025	0	0	0.0318356	0.0337336	0.0161062	0.0320402	0	0	0.0454002	0	0	0.0190126	0.0405726	0.0364278	0	0.0191876	0	0	0	0	0.0163016	0.0376042	0	0.0251221	0.0241868	0.00262551	0.0271925	0	0.00979068	0.0335496	0.0181395	0.0135179	0	0.0178637	0	0.127636
KLHL26	0.00408162	403	0.0526313	0	0	0.0194999	0.019254	0.0526313	0	0	0	0.0160715	0.0378264	0	0	0.0178012	0.00313966	0	0.0191426	0	0	0	0	0	0.0124811	0	0	0	0	0	0	0	0	0	0	0	0	0	0	0.00389629	0	0	0	0.00337666	0.00513724	0	0.00983071	0	0
KLHL28	0.0254278	206	0.18509	0	0.0273187	0.0123306	0	0	0	0.18509	0.0615573	0.0191387	0	0.0192503	0	0.00881189	0.0243072	0.0165681	0.0139252	0	0	0.0863551	0.0338009	0.0377523	0.0130715	0	0.0889838	0	0	0.0401798	0	0.0352708	0	0.00848702	0.0518821	0.0396043	0.00851373	0.0218711	0.0315923	0.0200789	0.0569384	0.0421515	0.0335234	0.0214351	0.0282412	0	0.0111415	0.0663419	0.108917
KLHL29	0	536.5	0	0	0	0	0	0	0	0	0	0	0	0	0	0	0	0	0	0	0	0	0	0	0	0	0	0	0	0	0	0	0	0	0	0	0	0	0	0	0	0	0	0	0	0	0	0	0
KLHL36	0.0257827	203	0.125476	0	0.0967244	0.0539425	0.0312103	0.0527573	0	0	0.0752671	0	0	0.0819865	0.125476	0.0172897	0.0431278	0.040782	0.0427395	0	0	0.0239916	0.0220236	0.0380238	0.0191766	0.0813913	0	0.0529368	0.0565322	0	0	0.0432014	0	0.0913298	0.0719311	0	0.0471294	0.010721	0.00258447	0.00571512	0.080113	0.0203077	0.0260848	0	0.0137051	0.0496331	0.0184581	0.0183467	0
KLHL42	0.0181003	262	0.14492	0	0.0313823	0.0325424	0.02308	0.0401164	0	0	0.0313924	0.0197792	0	0.0416828	0	0.00893518	0.0224741	0	0.0093304	0	0	0	0	0	0.0296086	0	0.0457771	0	0.0169022	0	0	0.0524386	0.0271359	0.1193	0.0405712	0.068931	0.030802	0.0201144	0.00516456	0.00339339	0.0459737	0.00792964	0	0.00298262	0.0154742	0	0.0164826	0	0.116213
KLHL5	0.0200762	240	0.107983	0	0	0	0	0	0	0	0	0.0371893	0.0177259	0	0	0.0182863	0.0251695	0.0274497	0.0372561	0	0	0	0	0	0.012897	0	0	0	0	0	0	0.0161797	0	0.0299561	0.0126102	0.0242921	0.0556126	0.0203952	0.0111417	0.0223852	0	0.0247885	0.00949796	0.00886916	0.0147302	0	0.00609924	0.0230678	0
KLHL6	0.033847	156	0.144256	0	0	0.00468953	0.0264361	0	0	0	0.0213964	0.0332187	0	0	0	0	0.0216998	0.0197539	0.0385575	0.0780051	0	0	0	0	0.00565769	0	0	0.101046	0.0105032	0.0331457	0	0.0345824	0.0209855	0.0294074	0.0543733	0.0608344	0	0.0213737	0.047309	0.0513761	0	0.087579	0.0402756	0.0332157	0.0593675	0.144256	0.0478891	0.0252455	0.107664
KLHL7	0.0376226	142	0.680399	0	0.0690389	0.0182388	0.0401477	0.0405723	0.0831285	0.198916	0.0544208	0	0.0176984	0	0	0.0180245	0.0212483	0.026459	0.0334283	0.0780691	0	0	0.0533991	0	0.0475611	0	0.0367268	0	0	0	0	0.0565284	0	0.0386299	0.0372013	0.0630459	0.0239197	0.0471547	0.0331149	0.0324103	0.0591897	0.0507646	0.0269438	0.0254482	0.0494346	0.0751582	0.0414146	0.0226998	0
KLHL8	0.036778	146	0.113229	0.107588	0	0.108147	0.0487972	0	0	0	0.0429328	0.0548581	0.0501094	0	0	0.0605314	0.0609451	0.0540809	0.0306416	0	0	0.0214281	0	0.0385592	0.020021	0.104696	0.0753686	0	0.0241197	0	0	0.0456788	0	0.0487993	0.113229	0.100167	0.0874104	0.067918	0.0181479	0.0219302	0	0.0178825	0.011417	0.018067	0.0260339	0	0.0416553	0.0959629	0.0447331
KLHL9	0.0331383	161	0.453755	0	0.032873	0.0444226	0.048637	0.0526313	0.0611442	0.453755	0.0642045	0.0789757	0	0	0.134149	0.0671354	0.0392073	0.0480547	0.0377103	0	0	0.043744	0.0322312	0	0.0441733	0	0.0413194	0.0482673	0.0182094	0	0	0.0291469	0	0.0624367	0.102962	0.0773412	0.0291338	0.0320182	0.00751962	0.0207753	0	0.0321567	0.0255852	0.00493128	0.0138589	0	0.0146036	0.0770298	0
LGALS3BP	0.0333704	158	0.323276	0	0.164718	0.26269	0.0975567	0.202169	0.0792806	0	0.110864	0.0543795	0.0152054	0.119773	0	0.0814033	0.0326118	0.00920932	0.0209506	0	0	0	0.0267581	0.100507	0.0236646	0	0	0	0.0180851	0	0.321016	0.0296182	0	0.0229182	0.00742636	0.0153122	0.0196698	0.0303386	0.00837313	0.00924688	0.0303365	0	0	0.0101087	0.0078586	0	0.0114741	0	0.112554
LNX2	0.00594772	383	0.0499026	0	0	0	0	0	0	0	0	0	0	0	0	0.00936228	0.00164794	0	0	0	0	0	0	0	0.00677387	0.0432204	0	0	0.0116052	0	0	0.0140914	0.0259664	0.0140558	0.00599057	0	0	0	0.00782016	0.00500308	0.0499026	0	0.0179948	0.00471222	0.00442857	0	0.00548829	0	0
LONRF1	0.0134467	304	0.168975	0	0	0	0	0	0	0	0	0	0.036291	0	0	0.00840916	0.00234523	0.0053826	0.00906178	0	0	0	0	0	0.00609859	0	0.0540034	0	0	0	0	0	0.0512892	0.0245372	0.0838254	0	0.0508572	0.00696542	0.00284061	0.00280082	0	0.0145719	0.0216548	0	0	0.168975	0.0131789	0.0230993	0
LONRF3	0.000692884	468	0.00930198	0	0	0	0	0	0	0	0	0	0	0	0	0	0.00149078	0	0	0	0	0	0	0	0	0	0	0	0	0	0	0	0	0	0	0	0	0	0	0	0	0	0	0	0	0	0	0	0
LRSAM1	0.0139403	299	0.712484	0	0.0976268	0.0199342	0	0.0707586	0	0	0.023959	0	0	0.0146198	0	0	0.0159603	0.0156251	0.00530747	0	0	0.0223543	0.0544377	0	0.0310046	0	0	0	0.0366317	0	0	0.0488496	0	0.0341677	0.0237872	0.0305221	0.0225851	0.0197245	0.00542363	0.0122506	0	0.00934712	0.0275663	0	0.00683056	0	0.0286906	0.0440988	0
LTN1	0.0260938	199	0.138221	0.112618	0.0279576	0.0172696	0.0298403	0.0529024	0	0	0	0.0167761	0.0517462	0.0408412	0	0.0090131	0.0144261	0.00527492	0.00939803	0.0559795	0	0.045219	0.0315775	0.0306471	0.0183437	0	0	0	0.0314092	0.0350843	0	0.0121771	0	0.0246706	0.04368	0.0308848	0	0.0122399	0.0132685	0.032168	0.0570497	0.0757263	0.0236495	0.0133215	0.0142394	0.138221	0.00593121	0	0
LZTR1	0.0122353	321	0.0813931	0	0	0.0358725	0.0355644	0	0	0	0.0124489	0.0185642	0.0204707	0.0211692	0	0.0270745	0.0183785	0.0162236	0.00963882	0	0.0813931	0.0211016	0	0	0.0187049	0	0.0444236	0.0561561	0.0168277	0	0	0.0152334	0	0.0185633	0.0153903	0	0.0130098	0	0.0105101	0.00888255	0	0.0223744	0	0.0253095	0.0128727	0	0	0	0
MAP3K1	0.0437543	116	0.211878	0.107588	0.101641	0.0786085	0.0738027	0	0	0	0.0182432	0.0914966	0.168109	0.0404435	0	0.100437	0.0925808	0.0204368	0.0784523	0	0	0.0911511	0.0235848	0.0363461	0.0382884	0.0771621	0.0805911	0	0.00816833	0.0254838	0	0.0297131	0.0989119	0.0724055	0.0480117	0	0.126745	0.043685	0.0081756	0.00813907	0.117861	0.0908761	0	0.00872865	0.0118262	0	0.0387428	0.0909803	0
MDM2	0.0727881	59	0.211555	0	0.0332384	0.0305294	0	0.0499753	0	0	0.110587	0.0196932	0	0	0	0.0349508	0.0336256	0.0112621	0.0234308	0	0	0	0.0631359	0	0.035397	0	0	0	0.0200824	0	0	0.0582965	0	0.0327704	0.0236505	0	0.0395109	0.00679625	0.0762056	0.0812897	0.0891571	0.0829952	0.0748783	0.0780601	0.0713045	0.211555	0.0870269	0.0716291	0
MDM4	0.0383836	137	0.162093	0	0.11389	0.0547597	0.0420817	0	0.0802703	0	0.0553786	0.0197504	0.0288149	0.0633074	0.14032	0.0308194	0.051734	0.0262926	0.0182048	0	0	0.0704775	0.0895838	0	0.0320329	0	0.0348549	0.0484501	0.03869	0.024329	0	0.0921252	0.0512631	0.0846023	0.0912359	0.10249	0.0236429	0.0345132	0.0211882	0.0247868	0.162093	0.0161665	0.045526	0.0242104	0.0480969	0.117067	0.0334755	0.0685517	0
MEX3B	0.00154026	446	0.0427785	0	0	0	0	0	0	0	0	0	0	0	0	0	0	0.00594323	0.0049767	0	0	0	0	0	0	0	0.0427785	0	0	0	0	0	0	0.0075901	0.00602253	0	0	0.0171786	0	0	0	0	0	0	0	0	0	0	0
MEX3C	0.0274042	187	0.202217	0	0.0287743	0.0241917	0	0	0	0.198916	0.069183	0.018924	0.0192691	0.0379034	0	0	0.0143207	0.0196789	0.0143578	0	0	0	0	0.0340847	0.0437108	0.0795743	0.0461384	0	0.0357394	0	0	0.0302292	0	0.0371437	0.0432476	0	0.0155061	0.0311091	0.0171715	0.023181	0.0570497	0.0400068	0	0.0106206	0.026665	0	0.00886592	0.0233997	0
MEX3D	0.000954445	458	0.0541423	0	0	0	0	0	0	0	0	0	0	0	0	0	0	0	0	0	0	0	0	0	0	0	0	0	0	0	0	0	0	0	0	0	0	0.0080217	0.00238813	0	0	0.011488	0	0	0	0	0	0	0
MGRN1	0.0259511	201	0.401795	0	0.0328282	0.0518521	0.0892394	0.0456733	0.0582649	0.401795	0.0360985	0	0.0403564	0	0	0.0321928	0.0300643	0.00468881	0.0377503	0	0	0.133224	0.0887412	0	0.0293979	0.0794821	0.040093	0	0.05529	0	0	0.0312791	0	0.0278766	0.0704274	0	0.0106222	0.0278703	0.015438	0.0153053	0.0499026	0.0097529	0.0261252	0.0104703	0.0281339	0	0.0164636	0.0220593	0
MIB1	0.0153752	280	0.0846683	0	0	0	0	0	0	0	0	0.0165628	0.0199734	0	0	0.0331707	0.0230714	0.00516303	0.0388999	0	0	0	0	0.0377523	0	0	0.0455204	0	0.0117697	0	0	0	0	0.0431521	0.0341509	0	0.020796	0.0416271	0.00800248	0.00806208	0.0846683	0.0459524	0	0	0.00719768	0	0.0099408	0.0220593	0
MIB2	0.0198981	242	0.291615	0.220296	0.188427	0.0539178	0.0801476	0	0.205602	0	0.291615	0	0	0.0203478	0.136467	0.0146587	0.00900722	0.0152652	0.0182862	0.0650702	0	0	0	0	0.0501887	0.117674	0	0	0.0292832	0	0	0	0	0.00433193	0	0.0345148	0	0.00685407	0.0137066	0.0134312	0	0.0276321	0.0306727	0.00950995	0	0	0.0247988	0	0
MKRN1	0.0887854	44	0.362254	0.220296	0.146076	0.257243	0.182753	0.362254	0.0672591	0.128164	0.131957	0.0464778	0.12097	0.0605185	0	0.100178	0.114618	0.0890641	0.0966321	0.111331	0	0.0452384	0.0825292	0.0358854	0.0659293	0.032431	0.119696	0	0.0465528	0.0550053	0	0.052578	0	0.111245	0.205536	0.038913	0.0848543	0.0704654	0.0198135	0.0482841	0.139533	0.194937	0.0427358	0.0336416	0.029635	0.116531	0.12429	0.220031	0
MKRN2	0.0427947	122	0.195732	0.195732	0	0.0404189	0.0879311	0	0	0.128164	0.0625624	0.0626722	0.0738019	0.0206363	0.137396	0.0505836	0.036011	0.0241902	0.043686	0.0671962	0	0.0429118	0	0.0367295	0.0195384	0.1141	0.0418115	0.11292	0.0199706	0.0199232	0	0.0847014	0.0214966	0.0310767	0.0650301	0.0276848	0.03753	0.01956	0.0387354	0.0576711	0.0654476	0.0115075	0.106942	0.0679009	0.0636924	0.0896705	0.0630844	0	0
MNAT1	0.048913	96	0.191843	0	0.0332851	0.0161945	0	0.0449533	0.116814	0.139518	0.0434273	0.014186	0.0197073	0	0	0.0164423	0.0141939	0.0149646	0.00819169	0.0559795	0	0.0449879	0.0321637	0	0.0436059	0.164713	0.040496	0	0	0	0	0.0261521	0	0.0225328	0.0278006	0	0.0285156	0.0115275	0.0514717	0.0876494	0.12298	0.0521385	0.113867	0.105749	0.100063	0.0604302	0.048204	0.0127491	0.0447331
MSL2	0.0234284	220	0.222385	0	0	0.0301001	0.0176219	0	0.0672591	0.222385	0.0436007	0.0312854	0	0.0203095	0	0.0252637	0.0308565	0.0156676	0.0140559	0	0	0.0236474	0	0.0706208	0.0264252	0	0.0874276	0.0453699	0.0330318	0.0343826	0	0.0115358	0	0.0905161	0.050424	0.123271	0.0424336	0.0335676	0.014486	0.00694295	0.0859074	0.0137392	0.0300119	0.00495461	0.0175969	0	0.00953478	0	0
MUL1	0.0381701	138	0.650003	0	0.0655903	0.0481473	0.127237	0	0	0.165331	0.0246345	0	0.0195406	0.0787275	0.268604	0.0318315	0.0295197	0.0153257	0.0275952	0.0660301	0	0	0.0571366	0	0.0478935	0	0	0.0453699	0.00896563	0	0.650003	0.039629	0.071409	0.0174698	0.015049	0.0335338	0.0129301	0.0507462	0.0708697	0.0554737	0.0966624	0.0627425	0.0124797	0.0405633	0.0362927	0	0.0545882	0.0192552	0
MYCBP2	0.0524182	91	0.314573	0	0.10603	0.0552953	0	0.0807336	0.314573	0	0.0763072	0.0713467	0.0372945	0.0206632	0	0.0569518	0.089994	0.0466182	0.0481634	0.0807615	0	0.0408975	0.0564654	0.0286928	0.0298249	0.0332727	0.1571	0	0.0276406	0.0310333	0	0.02069	0.0792559	0.0720034	0.116191	0.100958	0.0854374	0.109752	0.0174974	0.0290713	0.0993989	0.0539516	0.0800457	0.0344353	0.0353156	0.099553	0.0297549	0.0179905	0.119279
MYLIP	0.0249018	212	0.205051	0.195732	0.178049	0.0539749	0.0192435	0	0	0	0.0933989	0.0316345	0	0.0170214	0	0.0281916	0.0317534	0.0134876	0.0124034	0	0	0.0893892	0.0317046	0.0687504	0.0177248	0	0.0951091	0	0.0506385	0.033607	0	0.0488588	0.0823199	0.0464401	0.0605715	0.0384305	0.01557	0.0137846	0	0.00399726	0.03815	0	0.0442382	0.00442699	0	0.0388405	0	0	0
MYNN	0.0482048	100	1.39288	0.120792	0.0847417	0.0330099	0.121174	0.0456856	0	0.128164	0.0895607	0.0515594	0.0197073	0.0164799	0	0.025046	0.0417444	0.0468847	0.0192815	0	0	0.0397869	0.0553888	0.136545	0.062476	0.0421271	0.0798158	0	0.0212985	0.0303701	0	0.0298964	0.0224504	0.0264611	0.0409569	0.0235164	0.040429	0.0329438	0.0516573	0.0408572	0.11446	0.0456972	0.0123148	0.0423763	0.064551	0	0.0840098	0.025471	0.115374
NACC1	0.012833	313	0.134342	0	0	0	0	0	0	0	0	0	0	0.0363827	0	0	0.0131653	0	0	0	0	0.0168558	0	0	0	0	0	0	0.0105032	0.0303701	0	0.0151405	0	0.0196993	0.011568	0	0.0196072	0.00718915	0.00293644	0.0219247	0.134342	0.0192666	0.0401157	0.0154692	0.0118336	0	0.0118349	0.0230783	0
NACC2	0.00924722	351	0.0808782	0	0.0324778	0.0394252	0.0156943	0.0329275	0	0	0.0228651	0.0162429	0	0	0	0.00923672	0.0231565	0.011119	0.00420185	0	0	0	0	0	0.00600073	0.0808782	0	0	0	0	0	0	0	0.0150667	0.014995	0	0	0	0	0	0.03815	0.0212321	0	0	0	0	0	0	0
NEDD4L	0.00532121	392	0.0586426	0	0	0	0	0	0	0	0	0	0	0	0	0	0	0	0	0	0	0	0	0	0	0	0	0.0504856	0	0	0	0.0141783	0.0586426	0.00185803	0.0149577	0	0.0128288	0.0357926	0.0068739	0.0010823	0	0	0.0128333	0.013382	0	0	0.00443728	0	0
NEURL2	0.00147428	448	0.0285935	0	0	0	0	0	0	0	0	0	0	0	0	0	0.00325164	0	0.0051798	0	0	0	0	0	0	0	0	0	0.0207252	0.017195	0	0	0	0	0	0	0	0	0.00272143	0.000878995	0	0	0	0	0	0	0	0	0
NFX1	0.0472474	105	0.450083	0.450083	0.0582128	0.0272903	0.0421885	0.0560204	0.386645	0	0.0319805	0.0647831	0.0436541	0.0977098	0	0.0227844	0.028287	0.0648541	0.0309671	0.147006	0.0935843	0.0573276	0.0609974	0.033896	0.026158	0	0.0799547	0.102866	0.0717839	0.033607	0	0.0708495	0.0554578	0.0975376	0.0704664	0.0204013	0.0551613	0.0719685	0.0413695	0.0507047	0.0615875	0.0455726	0.0204786	0.0653573	0.0226737	0.118315	0.0691758	0	0
NFXL1	0.0142753	294	0.0457448	0	0	0	0	0	0	0	0	0.0195946	0.0188845	0.0394969	0	0.0180781	0.00999185	0.00596936	0	0	0	0	0	0	0.0190827	0.0405726	0.0457448	0	0	0	0	0	0	0.00854599	0.0037315	0	0.0122183	0.00554521	0.0217883	0.0219058	0	0	0	0.0139064	0.0201588	0	0.00740943	0.0194572	0
NOSIP	0.193828	12	0.915331	0.749454	0.200735	0.260281	0.341261	0.198083	0.439047	0.706644	0.463221	0.248845	0.238401	0.915331	0.533785	0.163729	0.201567	0.2413	0.212489	0.200686	0.284819	0.275517	0.359126	0.360674	0.396593	0.298689	0.389532	0.113352	0.0956315	0.296816	0.56168	0.131784	0.183404	0.132192	0.140684	0.178543	0.206866	0.178112	0.150571	0.159808	0.624486	0.129693	0.404076	0.233453	0.143952	0.421118	0.165292	0.109599	0.121934
NSMCE1	0.126775	28	0.680399	0.241703	0.12529	0.227145	0.139245	0.288458	0.220352	0	0.216266	0.188625	0.0698619	0.27019	0	0.104196	0.131711	0.218751	0.0957236	0.0728079	0.161814	0.116445	0.248765	0.107963	0.160469	0.181131	0.250305	0.198457	0.18418	0.208271	0.335155	0.127965	0.198423	0.13103	0.0876717	0.222008	0.208166	0.273541	0.101858	0.0990004	0.23745	0.123889	0.154067	0.107602	0.0481238	0.157476	0.10499	0.190387	0.210362
OSTM1	0.0642109	72	0.24579	0.112618	0.0518589	0.124255	0.0833941	0.102267	0	0.172291	0.24579	0	0.163511	0.121539	0	0.0539785	0.082132	0.0607768	0.10832	0	0.0698254	0.0184901	0.152734	0.0976234	0.0750628	0.111651	0.0439079	0.105775	0.0189207	0	0	0.0446368	0.128148	0.0613711	0.0781298	0.0265514	0.0942312	0.00813764	0.0216675	0.0402303	0.0467598	0.0311566	0.113415	0.0382543	0.0494349	0.0595646	0.0390994	0.0481243	0
OTUD7B	0.00426266	402	0.121934	0	0	0	0	0	0	0	0	0	0	0	0	0	0	0	0	0	0	0	0	0	0	0	0	0	0	0	0	0	0	0.00185803	0.00297695	0	0	0	0.00603417	0.00358194	0	0	0.022943	0.0127292	0.00519226	0	0.0115598	0	0.121934
PARK2	0.000916188	462	0.0552049	0	0	0	0	0	0	0	0	0	0	0	0	0	0	0	0	0	0	0	0	0	0	0	0	0	0	0	0	0	0	0	0	0	0	0	0	0	0.0552049	0	0	0	0	0	0	0	0
PATZ1	0.0102527	342	0.198916	0	0.0309884	0.0121307	0.0555592	0	0	0.198916	0.0114487	0	0.0182453	0.0220837	0.125476	0	0.00596697	0	0.013238	0	0.0583237	0	0	0	0.006163	0	0.0798576	0.0602811	0.0105565	0.0710167	0	0	0	0.0342008	0.0242962	0.0843018	0.0229491	0.0491978	0.00541641	0.00932234	0.0588393	0.00852759	0	0.00433683	0	0	0.0303446	0	0
PCGF1	0.0557156	85	0.292033	0	0.0461771	0.0844582	0.0515104	0.226966	0.145434	0	0.0788538	0.0692848	0.109902	0.0384144	0.141971	0.0515403	0.0662334	0.0877015	0.0618537	0	0.292033	0.171762	0.140611	0.0685369	0.130681	0	0	0.0535723	0.00594447	0.0832809	0	0.0266025	0	0.010791	0.0410127	0	0.0452874	0.0739873	0.0438919	0.0601092	0.108347	0.0580415	0.0752874	0.064145	0.057481	0.0954257	0.0624212	0.0501137	0
PCGF3	0.031613	170	0.751345	0	0.032586	0.0490358	0.0326175	0.167713	0	0	0.0556607	0.0177554	0.014891	0	0	0.0453424	0.020758	0.0331731	0.0630242	0.0762749	0	0	0	0	0.013045	0	0.0377914	0.0524902	0.0877901	0.0327405	0	0.0574136	0.0453446	0.0723762	0.0735824	0	0.010829	0.0200151	0.023091	0.0229851	0.0540027	0.0365512	0.0371434	0.0149022	0.0136116	0	0.00962002	0.0223014	0
PCGF5	0.136314	25	0.544539	0.112618	0.115959	0.180915	0.544539	0.225287	0.194947	0	0.156473	0.0380563	0.166158	0.079893	0	0.0972044	0.123011	0.0970328	0.17488	0.151209	0	0.0806099	0.0324136	0.145758	0.0854806	0.116565	0.0872796	0	0.0275487	0	0	0.0436266	0.0913824	0.0685191	0.0599529	0.0385209	0.0788447	0.0780184	0.156433	0.14878	0.329285	0.0739175	0.188731	0.238101	0.187558	0.308778	0.130988	0	0
PCGF6	0.0155734	279	0.111681	0.0791708	0	0.0209643	0.0444899	0.047806	0.0672591	0	0	0.0194703	0.0343638	0.0189082	0	0.00921229	0.0103516	0.0201262	0.0096579	0	0	0	0.032694	0	0.00589116	0	0.0384513	0	0	0	0	0	0	0.007788	0.00450522	0.0725782	0.0106222	0.0212232	0.0219357	0.0265086	0.0379085	0	0.0303511	0.0080981	0.0124927	0.0281151	0.0214207	0	0.111681
PEX10	0.0113707	330	0.126036	0	0.0267684	0.0323408	0.0422806	0	0.0974981	0	0	0.0340969	0	0	0	0.00836453	0.00761824	0.0284892	0.00887844	0	0	0	0	0	0	0	0	0	0.0200981	0	0	0	0	0.0087318	0.00345311	0	0.00980366	0	0.00290887	0.0122973	0.0802391	0	0.011417	0	0.00719768	0	0.0177945	0	0
PEX12	0.00785627	365	0.0741214	0	0	0	0	0	0	0	0	0	0.0741214	0	0	0	0.00703201	0.00933247	0.00995709	0	0	0.0248872	0	0	0	0	0	0	0	0	0	0	0	0.0172966	0	0	0.0238436	0.0197658	0.0139822	0.00410245	0.0654476	0.0115467	0.00826218	0.0165669	0.00687881	0	0.010835	0	0
PEX2	0.0936601	42	0.332914	0.332914	0	0.113596	0.112914	0.0447082	0.0802703	0	0.19886	0.0439821	0.0672845	0.0567445	0.14032	0.118605	0.0789971	0.10536	0.0620937	0.317869	0.158945	0.0848942	0.124316	0.0650834	0.0814979	0.0385891	0.091219	0	0.0106934	0.0560605	0	0.0308263	0.0918376	0.0534685	0.0735248	0.0623193	0.0965365	0.11068	0.120092	0.121298	0.291654	0.0978864	0.141496	0.133993	0.148738	0.210595	0.127849	0.150944	0.20506
PHF7	0.00878121	357	0.120342	0	0	0	0	0	0	0	0	0	0.012631	0.0220667	0	0	0.0103076	0.00409697	0.012963	0	0.0794219	0	0.0310261	0	0.00651905	0.0321814	0	0	0.00961387	0	0	0	0.0134838	0.0353602	0.0160016	0	0.0320888	0.0333219	0.00633151	0.010077	0	0	0	0.00931612	0.00729165	0.0496331	0.0112859	0.0228103	0
PHRF1	0.011094	334	0.112618	0.112618	0	0.0178962	0.0200741	0	0.0682555	0	0.054136	0	0	0	0	0.0165256	0.0118776	0	0.0124622	0	0	0	0	0	0.02067	0	0.0462052	0	0.0204362	0	0	0	0	0.0177008	0.0163865	0.0397388	0.0296565	0.00535875	0.00791264	0.00535012	0.0993989	0.0198974	0	0.00923455	0	0	0.00941885	0	0
PJA1	0.0172947	269	0.154598	0.146181	0.114082	0.0216191	0.0364147	0	0	0	0.0811829	0	0.0191028	0.0600017	0	0	0.0100232	0.0257305	0.00455302	0	0.0619	0	0	0	0.0374288	0	0.040496	0	0	0	0	0	0	0.0102038	0	0	0.0186505	0.0297821	0.0213011	0.0235308	0	0	0.0575115	0.0329196	0.00706922	0	0.0331468	0	0.154598
PJA2	0.119022	32	0.712484	0	0.0165678	0.0982282	0.107353	0.125806	0.143986	0	0.114928	0.0480226	0.0590529	0.0211108	0	0.0478011	0.100397	0.0854384	0.0867852	0.132645	0.0599358	0.137922	0	0.0340847	0.0882272	0.149714	0.134879	0.102617	0.0784948	0	0.363355	0.131947	0.10471	0.162433	0.312028	0.0615127	0.167426	0.113333	0.0807001	0.112986	0.0545291	0.218978	0.158108	0.126528	0.117645	0.049606	0.0652489	0.231754	0.18035
PML	0.036627	149	0.388291	0.0791708	0.12834	0.120619	0.12831	0.0562792	0.105598	0.388291	0.0399783	0.0538026	0.0561779	0.0636581	0.14032	0.0990117	0.0227737	0.0409583	0.0377074	0.0832059	0	0.0167995	0	0	0.0414647	0.0821587	0.110155	0	0.110246	0	0	0.0904161	0.0515981	0.0648591	0.128118	0	0.0820221	0.0263637	0.0054385	0.0135945	0	0	0.0291305	0.00891639	0.00646166	0.0420771	0.0206192	0.0471423	0
PPIL2	0.0257007	205	0.139518	0	0.0974108	0.0465456	0	0	0.0611442	0.139518	0.0441956	0.0473992	0.0287589	0	0	0.0343916	0.0278897	0.00514421	0.0263242	0.0796857	0	0.0208114	0	0	0.0262219	0.0401484	0.0401558	0	0.0394628	0.0356917	0	0.0380239	0.012504	0.0267252	0.0370917	0.0259538	0.0111604	0.0342577	0.0279697	0.0283717	0.0392545	0.0301745	0.0368092	0.0230135	0.0192855	0.0566366	0.0305995	0	0
PRPF19	0.125723	29	0.773634	0.112618	0.181612	0.147994	0.137338	0.48326	0	0	0.165496	0.156666	0.051788	0.059322	0.118678	0.0604083	0.0569545	0.112246	0.0560449	0.0832059	0.154108	0.0437032	0.0519186	0.105791	0.0610564	0.037315	0.105893	0.0466439	0.117486	0.111504	0	0.0437679	0.0412404	0.0624929	0.0262361	0.128079	0.0818857	0.119802	0.169315	0.214298	0.773634	0.0284174	0.123431	0.191523	0.112089	0.486774	0.311791	0.0178521	0.324244
RAB40B	0.0139233	301	0.0599684	0	0	0	0	0	0	0	0	0.0131484	0	0.0179525	0	0	0	0	0	0.0541207	0	0	0	0	0.0189881	0	0	0	0	0	0	0	0.0599684	0	0	0.0365053	0.0118915	0	0.0229074	0.0381086	0	0	0.0131971	0.00928014	0.0268997	0	0.0259429	0	0
RABGEF1	0.014501	291	0.125514	0	0	0	0	0	0	0	0	0.0195252	0.0195533	0	0	0.0187981	0.0031299	0.0153945	0.0147313	0	0	0	0	0	0	0.037315	0	0	0.0236247	0.0492783	0	0.0157615	0.0197282	0.0137387	0.0625407	0	0	0	0.0243837	0.0159657	0.0467598	0.0692541	0.0538051	0.0156034	0.0211717	0	0.0080148	0.0244161	0.115374
RAD18	0.0197939	243	0.491252	0	0	0	0	0	0	0	0	0	0	0	0	0	0.00442713	0.010788	0.00522639	0	0	0	0	0	0.0120166	0.0421271	0	0	0.0161903	0	0	0.0273617	0.0160361	0.0250622	0.0237843	0	0.0138314	0.0316387	0.0181184	0.0412155	0.11149	0.0442194	0.0377453	0.0250586	0.0224177	0.0448253	0.0316141	0	0
RBBP6	0.0913558	43	0.491252	0.195732	0.158468	0.155821	0.0798621	0.102859	0	0	0.16777	0.032635	0.0364989	0.142392	0	0.114683	0.0988784	0.0921244	0.0911597	0.194095	0.20069	0.0867765	0.182416	0.0728816	0.0924192	0.0862203	0.0439079	0.135212	0.107509	0.114199	0	0.15552	0.0481967	0.163667	0.124656	0.18606	0.192885	0.195377	0.014842	0.04599	0.15027	0.0140232	0.0159363	0.0399598	0.0452056	0.0342486	0.0480275	0.0407031	0
RBCK1	0.0855771	48	0.83721	0.83721	0.181911	0.300406	0.307382	0.400662	0.295904	0.422347	0.329378	0.117645	0.0931745	0.101519	0.134149	0.195553	0.113434	0.129515	0.102877	0.141464	0.0583237	0.0738402	0.233415	0.0664203	0.115507	0.155482	0.212186	0.0484501	0.136012	0.0658617	0	0.12872	0	0.0691253	0.0549432	0.0726575	0.0671301	0.0498421	0.0476684	0.0300453	0.03815	0.044072	0.0767097	0.0361095	0.0408817	0.116331	0.0805488	0.0978903	0.0986815
RBX1	0.793495	1	1.63856	1.10618	0.586604	0.750742	1.11185	0.941349	1.30702	0.470646	0.738206	0.581962	0.817114	0.367084	0.885518	0.581739	0.591248	0.773207	0.628624	0.776567	0.738816	0.414825	0.551523	0.659224	0.635605	0.852321	0.469139	0.501605	0.640995	0.70905	0.334745	0.709152	0.741542	0.961948	0.981192	1.17949	1.45543	1.30598	0.797946	1.01723	1.63856	1.2241	1.1357	1.08245	0.946445	1.41035	0.900833	0.934822	0.938159
RC3H1	0.0197751	244	0.121071	0.121071	0	0.0131113	0	0	0	0	0.0256751	0.0164357	0.0359852	0	0	0.00784466	0.0310568	0.0107985	0.0185036	0.0559795	0	0.0434211	0.0581644	0	0.0249854	0.0359651	0.0745776	0	0.0213733	0	0	0.014286	0	0.0476739	0.0858786	0.0316614	0.0340397	0.0326518	0.0157355	0.00570274	0.0919112	0.0197101	0	0	0	0.0576888	0.0175355	0.0555731	0
RC3H2	0.0297467	181	0.285972	0	0	0.0479268	0.0906012	0	0	0.285972	0.0475702	0	0.058061	0.0628095	0.127398	0.0154897	0.0278498	0.0355485	0.0499625	0.0780691	0.0738576	0	0	0.106397	0.0185231	0.0390784	0	0	0.0158575	0	0	0.0435511	0	0.0385497	0.0471196	0.0708881	0.0175803	0.0351083	0.0284157	0.0171482	0.0600751	0.0120615	0.00626973	0.0140705	0.0059113	0	0.0420559	0	0.111281
RCBTB1	0.019022	252	0.491252	0.112618	0	0.0508367	0.0373794	0.157486	0.0565328	0	0.010236	0.016835	0.074545	0.0182601	0	0.0178183	0.0204453	0.0188865	0.056053	0	0	0	0.0252759	0	0.0125595	0	0	0	0.0247889	0	0	0.0463218	0.0134838	0.0388148	0.0343932	0	0.0120514	0.0261221	0.00167315	0.0150227	0.10086	0.0135156	0	0.00298262	0.00619031	0.069303	0	0	0.0913068
RCBTB2	0.0872239	47	0.273611	0	0.13851	0.273611	0.184754	0	0	0	0.135937	0.107241	0.0961118	0.0361271	0	0.17747	0.145164	0.10388	0.219205	0.130123	0	0.154512	0.109043	0.107709	0.116457	0.11843	0	0.0482673	0.0266151	0.0353602	0	0.0108845	0.0949362	0.0169986	0.039355	0	0.152793	0.0194647	0.0989956	0.0932001	0	0.0198485	0.183614	0.0960364	0.0656953	0.0292403	0.0834987	0.0862693	0
RCHY1	0.0694001	64	0.341257	0	0	0.0620272	0.0841533	0	0.126012	0.341257	0.124795	0.0377956	0.0356694	0.0380745	0	0.0390678	0.0542232	0.0259464	0.04813	0.0559795	0.122455	0.024231	0.0561594	0.0380514	0.0555878	0	0.0401349	0	0.0650276	0.0361339	0	0.103492	0.012504	0.0794654	0.0801615	0	0.0339634	0.114796	0.0479342	0.0620217	0.270622	0.123609	0.0241467	0.0493605	0.072296	0.0839604	0.0463205	0.126753	0.0447331
RFFL	0.0185226	261	0.168924	0	0	0.0372194	0.0173113	0	0	0.127014	0.0230707	0	0	0	0	0.0276208	0.0322801	0.00987823	0.00495687	0	0	0	0.0281588	0.0372801	0.0490716	0.0713415	0.0457448	0	0	0.0347275	0	0.0140914	0.0562657	0.0613326	0.0324783	0	0	0.0363406	0.0144303	0.00490234	0.168924	0.0129767	0	0	0.00636209	0	0.00942338	0.0231839	0
RFWD2	0.033318	159	0.187221	0.112618	0.0562881	0.081556	0.187221	0	0.0781332	0	0.0432635	0.0371799	0.0350109	0	0	0.0248663	0.0412685	0.021008	0.0551237	0.0559795	0	0.0643872	0.0281732	0.0310368	0.0132058	0	0	0	0.0226896	0	0	0.0615342	0.0499778	0.123046	0.0782123	0.0332727	0.0766263	0.0407682	0.0158231	0.0096928	0.0937836	0.0531002	0.0131971	0.00598999	0	0.102158	0.019601	0.090342	0
RFWD3	0.0217456	228	0.120678	0	0.0279974	0.0158596	0	0.0835724	0.0556693	0	0	0.0186225	0.0178843	0.0203095	0	0	0.0116014	0.00577475	0.00463462	0	0	0.0216748	0	0	0.00543306	0	0	0	0.0782866	0.0199232	0	0.0303228	0.0215566	0.120678	0.0511341	0.0342771	0.02056	0.0415368	0.00591485	0.0259375	0.0999765	0.0780751	0.0375698	0.00760435	0.00575307	0	0.0576525	0	0
RHOBTB1	0.00319749	418	0.334745	0	0	0	0	0	0	0	0	0	0	0	0	0	0	0	0	0	0	0	0	0	0	0	0	0	0	0	0.334745	0	0	0	0	0	0.0132251	0.0141027	0	0	0	0	0	0	0	0	0	0	0
RHOBTB2	0.00275417	425	0.0353972	0	0	0	0	0	0	0	0	0	0	0	0	0.00958303	0.00323037	0.0144302	0	0	0	0	0	0	0	0	0	0	0	0	0	0	0	0.00506951	0.00311687	0.0353972	0.0119829	0	0.00298301	0	0	0	0	0.00433683	0	0	0	0	0
RHOBTB3	0.00891131	355	0.140371	0	0	0	0	0	0	0	0	0	0	0	0	0	0.0015087	0.00431072	0	0	0	0	0	0	0	0	0.0385617	0	0.00967909	0	0	0.0135136	0	0.0141145	0.0297743	0.0220882	0.00846651	0.0363209	0	0.00457557	0.0979836	0	0.01769	0.014484	0.00524075	0.0448253	0.0105751	0	0
RING1	0.0235302	218	0.12615	0	0.12615	0.0729016	0.0481942	0.0896847	0.0673012	0	0.0214556	0.0300106	0	0.0196702	0	0	0.0349481	0.0308434	0.0287388	0	0	0.023274	0.0327655	0	0.0575509	0.0432204	0.0854358	0	0.00810045	0.0259664	0	0.025965	0.0178752	0.0220148	0.0195717	0.108755	0.0453514	0.0452198	0.0147892	0.0164459	0	0	0	0.0202855	0.0224926	0	0.00853805	0	0
RNF10	0.102235	39	0.530563	0	0.122336	0.127299	0.164196	0.148545	0.226427	0.215468	0.15135	0.0697763	0.057332	0.094318	0.530563	0.0416379	0.0824	0.0668069	0.0679354	0	0	0	0.0252345	0.0462568	0.0387453	0.0377527	0.08657	0.0454677	0.142832	0.103549	0	0.153397	0.0402231	0.14951	0.143106	0.103923	0.0854118	0.108379	0.0754056	0.0739674	0.402184	0.254723	0.0952131	0.0580789	0.070851	0.156013	0.033336	0.415585	0.0913068
RNF103	0.0311039	174	0.100773	0	0	0	0	0	0	0	0	0	0	0	0	0	0.0174644	0.0144235	0.00508365	0	0	0	0	0	0	0	0.0335131	0	0.0198005	0	0	0	0.0504506	0.0543982	0.0749515	0	0	0.0265849	0.0220032	0.023187	0	0.0331169	0.0168197	0.0462669	0.0334112	0.0634889	0.00683023	0	0.0914018
RNF11	0.06293	75	0.533215	0.129085	0.104488	0.115161	0.135239	0.166878	0.177768	0	0.0730322	0	0.0559901	0.0581868	0	0.0271164	0.0406335	0.0180508	0.0554249	0	0.0654989	0.023568	0	0.0358854	0.0581671	0.0364672	0.13613	0	0.0254989	0	0	0.061596	0.107143	0.142817	0.197125	0.223629	0.0900769	0.0590543	0.00853713	0.0120281	0.0588393	0.0210253	0.0489363	0	0.00668908	0	0.00784282	0.0205633	0
RNF111	0.0230504	222	0.188123	0.188123	0.0255961	0.0297575	0.0235406	0	0	0.172822	0.0227093	0.0182482	0	0	0	0.0081399	0.0261452	0.00837753	0.0224835	0	0.0798564	0.0453522	0	0.0728067	0.0191537	0.0434241	0	0	0.0063194	0.0322471	0	0.0621567	0.0203799	0.0522351	0.057108	0.0354145	0.0335622	0.020721	0.0266294	0.00786702	0.14234	0.0466449	0.0257857	0.0109627	0.0222952	0.0296051	0.014868	0.0232803	0
RNF113A	0.138158	23	0.42664	0.117352	0.184204	0.123191	0.120682	0.142531	0.191488	0	0.258484	0.114679	0.16193	0.0633244	0.128284	0.113089	0.0852134	0.12018	0.0986761	0.42664	0.156053	0.152371	0.186353	0.0674479	0.146838	0.0360198	0.0427785	0.0491663	0.0581715	0.146305	0.273133	0.0795455	0.0460522	0.0876767	0.0733958	0.129052	0.0820255	0.0848941	0.201663	0.172325	0.093123	0.0825855	0.193554	0.176939	0.184959	0.165133	0.23182	0.119963	0.265285
RNF114	0.192712	13	0.751345	0.44477	0.158393	0.251547	0.319848	0.380573	0.415704	0.455473	0.165928	0.138323	0.302013	0.160493	0.390265	0.187363	0.178651	0.144132	0.1634	0.284113	0.0843069	0.154768	0.0304873	0.0671573	0.119963	0.0476345	0.161011	0.104049	0.171287	0.104354	0.321016	0.130719	0.0858972	0.16689	0.2284	0.326748	0.146245	0.138934	0.188044	0.219735	0.30561	0.171048	0.152154	0.192379	0.178856	0.346865	0.222518	0.0348636	0.14495
RNF115	0.0577653	81	0.350453	0.208256	0.0903912	0.0507078	0.0550813	0.0537971	0.175631	0.128164	0.115548	0	0.0390827	0.0361979	0	0.0661891	0.0442593	0.0497474	0.0309981	0	0.0665326	0.0167995	0.0281588	0.0358854	0.0188846	0.0360198	0.0831888	0	0.091234	0	0	0.05075	0.0230808	0.153971	0.0473534	0.0803529	0.118356	0.072675	0.0485565	0.064537	0.0303365	0.0719593	0.078989	0.0622341	0.0551107	0	0.0631844	0.0222167	0.0543811
RNF121	0.0323822	166	0.0967553	0	0.0319753	0.0182149	0.0419019	0.0401164	0.0781332	0	0	0.013866	0	0	0	0.00779799	0.0284321	0.0261584	0.022969	0.0787828	0.079465	0.0203641	0.0616795	0	0.0234237	0	0.0906288	0	0.0119024	0	0	0.015482	0	0.00323472	0.0125966	0	0.007953	0.0150432	0.049245	0.0541077	0.0540027	0.0235217	0.0285572	0.0573452	0.0701752	0.0281151	0.00759457	0.0145246	0.0914018
RNF122	0.00519238	394	0.0746315	0	0	0	0	0	0	0	0	0	0.0406945	0	0	0	0.00505074	0.0108166	0.00948186	0	0	0.0200569	0	0	0.012903	0	0	0	0	0	0	0	0	0	0	0	0	0	0.00473169	0.00350591	0	0.0100041	0.0132515	0.00484604	0	0	0	0	0
RNF123	0.0121507	324	0.166667	0	0	0.0315911	0.0478654	0	0.0613242	0	0.0192585	0	0.0164072	0.0214694	0	0	0.0216036	0.00490379	0.00465045	0	0	0	0	0.0375662	0.0191323	0	0	0	0.00816833	0	0	0	0	0.0168231	0.0244119	0	0.0413057	0.00729094	0.00815483	0.00428738	0.03815	0.00841144	0.016033	0.0157474	0	0	0.0150626	0.0255284	0.166667
RNF125	0.0266451	193	0.599966	0.599966	0	0.0579212	0	0.26918	0	0.222385	0.170803	0.0362366	0.023516	0.167827	0	0.0354708	0.0484501	0.040403	0.05464	0	0.0754528	0.0882007	0.063331	0.111866	0.107853	0.0426935	0.209899	0	0	0.0347056	0	0	0	0.00733589	0.0130617	0.0821542	0.0575196	0.0337601	0	0	0	0	0	0	0	0.0342486	0	0.0221422	0.116213
RNF126	0.060829	79	0.442857	0.442857	0.130876	0.161514	0.224951	0.15847	0.395114	0.181484	0.226023	0.0307297	0.121	0.0611674	0	0.0711017	0.0525322	0.0536378	0.0590443	0.0767882	0	0	0.0267581	0.0690992	0.0997721	0.119289	0.0763888	0	0.0289304	0.11114	0	0.0595047	0	0.0363141	0.085092	0.0702088	0.0272135	0.0239008	0.0360529	0.0575772	0.22344	0.0855804	0.0313243	0.0424427	0.0385672	0.189439	0.0684035	0.0251902	0
RNF128	0	536.5	0	0	0	0	0	0	0	0	0	0	0	0	0	0	0	0	0	0	0	0	0	0	0	0	0	0	0	0	0	0	0	0	0	0	0	0	0	0	0	0	0	0	0	0	0	0	0
RNF13	0.15795	19	0.954245	0.120792	0.0619509	0.245801	0.251854	0.275373	0.230345	0	0.183361	0.200894	0.356045	0.0908954	0	0.290726	0.243957	0.186795	0.271439	0	0.0823919	0.211697	0.0898199	0.340738	0.105695	0.150424	0.22393	0.14677	0.0603289	0.094569	0.875634	0.0724134	0.0921872	0.0862548	0.154806	0.103285	0.155853	0.0824939	0.101482	0.0755156	0.0634746	0.219584	0.0855125	0.0825869	0.102334	0.079966	0.0599967	0.340554	0.21992
RNF130	0.294782	8	1.21277	0.107588	0.132063	1.21277	0.885931	0.865615	0.769134	0.313253	0.0959154	0.755987	0.56607	0.123745	0	0.849695	0.994598	0.785689	0.813668	0.0572098	0.139229	0.848455	0.400759	0.893592	0.148199	0.430628	0.605632	0	0.0719052	0	0	0.194641	0.103723	0.0699071	0.283466	0.344174	0.316005	0.186357	0	0.00940902	0.702258	0.16127	0.0314512	0.0036037	0.0214756	0.352194	0.0494024	0.217739	0.20223
RNF135	0.0371791	145	0.219009	0	0.0172194	0.188929	0.219009	0.141886	0.101074	0	0.0430185	0.100679	0.0900115	0	0	0.0949089	0.107728	0.062859	0.0740089	0.0703641	0.197628	0.114815	0.0311861	0.217479	0.0310074	0	0.0825013	0	0.0276375	0	0	0	0	0.00716333	0.0512844	0.0574362	0.0508957	0.0351762	0.0050314	0.00224982	0	0	0.0127568	0.00993124	0	0	0.00648842	0	0
RNF138	0.0742715	58	0.368751	0.208256	0.0910397	0.118325	0.166141	0.202339	0.125323	0.267681	0.0696641	0.0858971	0.0656467	0.0551272	0	0.0652782	0.080681	0.0663489	0.100244	0	0.0698254	0.0711568	0.0465534	0.069702	0.0484642	0.0332727	0.146588	0.0524902	0.0600194	0.0660028	0	0.113951	0.0315896	0.0982387	0.162163	0.0590591	0.11373	0.0895234	0.0288292	0.0275568	0.0552049	0.143028	0.0931184	0.0349178	0.0579584	0.117656	0.0377825	0.0433374	0.202135
RNF139	0.034243	155	0.139604	0	0	0.0615686	0.0255662	0.139604	0.0867608	0	0.0932291	0.0366549	0.0981735	0	0	0.035777	0.0240423	0.0347917	0.0373964	0	0	0.0231094	0.0288027	0	0.0258028	0	0	0	0	0	0	0.0673659	0.0234958	0.0637463	0.0351861	0.0289403	0.0331458	0.0456496	0.018102	0.00997911	0	0.0200156	0.022858	0.0190913	0.00663177	0.0388405	0.0280451	0.0434119	0
RNF14	0.0429438	121	0.206993	0.112618	0.0328282	0.041878	0.0622141	0.0560633	0	0	0.0119211	0.0343736	0.0510672	0.0203223	0	0.0503414	0.0347917	0.0368759	0.0368211	0.0559795	0.0753067	0.0209818	0.05366	0	0.0812906	0	0.0456803	0.0533727	0.0113315	0.0276067	0	0.0162755	0	0.0179477	0.0161472	0.112069	0.0469282	0.0147697	0.0487813	0.0628983	0.0467598	0.0491969	0.0202853	0.0816399	0.0431305	0.175677	0.0488916	0	0
RNF141	0.117544	34	0.937275	0.188123	0.213611	0.157073	0.462279	0.107775	0.244365	0	0.0558791	0.0650555	0.306419	0.0317634	0.118678	0.186396	0.158727	0.131534	0.188142	0.219278	0.0848895	0.0639664	0.114498	0.179999	0.0780307	0.0426935	0.109621	0.207696	0.0367703	0	0.937275	0.0661067	0.04224	0.0679076	0.137025	0	0.139444	0.0844508	0.060409	0.0675005	0.435272	0.184313	0.037809	0.0450234	0.0396816	0.266852	0.0923718	0.300404	0
RNF144A	0.0117101	327	0.125679	0	0	0	0	0	0	0	0	0	0	0.0214234	0	0.0065668	0	0	0	0	0	0.023274	0	0	0.0165918	0	0.0392845	0	0.0221598	0.0342982	0	0.0296391	0.0263998	0.064029	0.0570924	0	0.0287067	0.0192302	0.00245856	0	0.0392545	0	0	0	0	0.0686112	0	0	0
RNF144B	0.024994	210	0.265673	0	0.0553161	0.110777	0.106209	0	0	0	0	0	0.019528	0	0.134149	0.035587	0.0317915	0.0271203	0.0298969	0	0.0541916	0.045446	0	0	0	0.0315016	0.0810014	0.0482673	0	0.0448726	0	0.0244888	0.0209855	0.0140367	0.0473203	0.0361301	0	0.0135393	0	0	0.0541005	0.0117857	0	0	0	0	0.014177	0	0
RNF145	0.125496	30	0.692747	0.662933	0.362596	0.279975	0.509654	0.314153	0.692747	0.371729	0.41324	0.0662966	0.0710371	0.112128	0.128209	0.187707	0.106655	0.150822	0.0739183	0.0650702	0.167513	0.13205	0.181186	0.176677	0.137216	0.126129	0.290181	0	0.0587646	0.0180458	0	0.0452381	0.0770103	0.14471	0.29359	0.382525	0.156812	0.101323	0.0696686	0.0672433	0.181518	0.264099	0.080671	0.078401	0.116726	0.151006	0.17273	0.198089	0
RNF146	0.0506145	95	0.217079	0.129085	0.0707295	0.105648	0.217079	0.0488437	0	0	0.0775883	0	0.0789694	0.0591419	0	0.118711	0.100162	0.0718977	0.107681	0	0	0.0693491	0.0924161	0.0780623	0.0651246	0.109002	0.0769625	0.0448753	0.00625445	0.0668776	0	0.0572255	0	0.0203757	0.0446633	0	0.0217736	0.0136367	0.023942	0.0281316	0	0.091101	0.0249642	0.024844	0.0200915	0.0695713	0.0557545	0.141301	0
RNF149	0.181464	14	1.04028	0.277554	0.0935304	0.428331	0.926142	0.0496361	0.156189	0.148906	0.202971	0.0755665	0.516917	0.213367	0	0.254272	0.278383	0.155718	0.235579	0	0.230696	0.241893	0.116583	0.0766611	0.175763	0.185591	0.137115	0.0544637	0.0427523	0.042681	0	0.116301	0.109818	0.0966341	0.260422	0.230187	0.122771	0.0342973	0.0601643	0.0655146	0.0843393	0.414962	0.115671	0.0494985	0.0795423	0.0296051	0.0591613	0.456396	0
RNF150	0.00264675	429	0.0692093	0	0	0	0	0	0	0	0	0	0	0	0	0	0	0	0	0	0	0	0	0	0	0	0	0	0	0	0	0	0	0	0	0	0	0	0	0	0	0	0	0	0	0	0	0	0
RNF166	0.128224	27	1.18496	0.353737	0.229653	0.473917	0.526793	0.525367	0.460917	1.18496	0.59035	0.152386	0.247109	0.279977	0	0.406408	0.332773	0.235475	0.272694	0.1101	0.075822	0.315227	0.181666	0.354084	0.410919	0.363162	0.169675	0.0383818	0.125095	0.0508542	0	0.158506	0.0475532	0.0697453	0.160117	0	0.0567652	0.0202414	0.00899416	0.0115501	0	0.0782943	0.0645817	0.0152579	0.0143913	0.0292403	0.010723	0.0459198	0
RNF167	0.210417	11	0.768065	0.23341	0.414838	0.356132	0.271239	0.355743	0.319738	0.287121	0.768065	0.131074	0.301338	0.399848	0.264385	0.173147	0.235625	0.198123	0.206138	0.2357	0.137353	0.2745	0.178516	0.0306471	0.471358	0.611995	0.281543	0.208679	0.432751	0.340237	0.363355	0.610796	0.203949	0.185321	0.198925	0.191221	0.149169	0.18144	0.19193	0.165399	0.19108	0.228014	0.256399	0.144618	0.122273	0.205718	0.102785	0.093468	0.660286
RNF168	0.0235662	217	0.324817	0.324817	0.0669425	0.0395932	0.0567382	0.0527573	0	0	0.0683388	0	0	0.0188182	0	0.0262392	0.0265939	0.0213416	0.00369875	0	0	0.0444057	0	0	0.0628193	0	0	0.0455239	0.0534813	0.0227033	0	0.0430336	0.0279675	0.0243188	0.0358346	0	0.0238312	0.00591074	0.028087	0.01897	0	0.0395404	0.0114835	0.0180131	0.0130583	0	0.00616729	0	0
RNF169	0.0125409	317	0.0940915	0	0	0	0	0	0	0	0	0	0	0	0	0	0.0116982	0	0.0240504	0	0	0.039074	0	0	0.0364655	0	0	0	0.0100355	0.0940915	0	0	0.0134838	0.035732	0.0290686	0.0265514	0.00605052	0.020995	0	0.00820471	0.0588393	0.0467837	0.0179557	0.00441381	0.00685112	0	0.0159576	0.0895091	0
RNF170	0.0537491	88	0.17898	0	0.122797	0.0530733	0.0855852	0.0386191	0.0857215	0.158958	0.0689986	0.0196367	0.052809	0.0784754	0	0.0449461	0.0558206	0.0641806	0.0318632	0	0	0.0239749	0.06149	0.066394	0.0648676	0	0.0453311	0	0	0	0	0.0451922	0.17898	0.040576	0.0707138	0	0.0722236	0.0513103	0.0641486	0.0532465	0	0.0829266	0.0344063	0.0796606	0.0581374	0.124764	0.0665828	0.10429	0
RNF181	0.549561	4	0.856051	0.52384	0.328374	0.65819	0.72207	0.48133	0.234561	0.172822	0.444211	0.268353	0.420691	0.286603	0.134672	0.487764	0.476872	0.546936	0.462736	0.451214	0.264187	0.600278	0.426686	0.441889	0.380411	0.161728	0.488603	0.701332	0.473662	0.519807	0.724105	0.438144	0.602244	0.412167	0.467672	0.54023	0.709301	0.724518	0.655407	0.688208	0.651326	0.628571	0.744726	0.752696	0.675974	0.662262	0.52531	0.500697	0.392537
RNF185	0.0375421	143	0.396726	0.396726	0.0860178	0.046726	0.13663	0	0	0.287121	0.057126	0	0.0193297	0.0403765	0	0.0488931	0.0388281	0.0298774	0.043182	0	0.0756367	0.0440275	0.032119	0.0726433	0.0135545	0.0410124	0	0	0.0111349	0.0309272	0	0.0306208	0.086705	0.0340481	0.0166738	0	0.00632317	0.0247836	0.0526885	0.042965	0.0878111	0.0211654	0.0211313	0.0389456	0.0649149	0.102019	0.0203346	0.0646652	0
RNF187	0.0239674	216	0.215468	0.112618	0.0341922	0.0599763	0.113694	0.14373	0	0.215468	0.0987576	0.0165628	0.0197073	0	0	0.0409778	0.025424	0.00400446	0.00473798	0.0559795	0.0734494	0.0390359	0.0285577	0	0.00648664	0	0	0	0.0209397	0.0276067	0	0.0318462	0.0724613	0.0746455	0.0408607	0	0.0623639	0.0202621	0.0140207	0.00850294	0	0	0.029434	0.0170418	0	0	0.0108083	0	0.0986815
RNF19A	0.0396899	133	0.491252	0	0	0.0236778	0.0218607	0.0329275	0	0.18509	0.035146	0.0145607	0.0177906	0.0407141	0.122086	0.00747434	0.0211159	0.0253573	0.0216146	0	0.143537	0.0203641	0	0.101783	0.0335967	0.0321814	0.0469984	0	0.0109671	0	0.273133	0	0.047146	0.0238134	0.0685085	0	0.0407326	0.0364978	0.0348228	0.0386252	0.155535	0.0582341	0.0794486	0.0512308	0.0283649	0.0388405	0.0693131	0.0598025	0.154598
RNF19B	0.0125234	318	0.129668	0	0	0	0	0	0	0	0	0	0	0.0200847	0	0.0166014	0.0113682	0.0100058	0.0226014	0	0	0.0433097	0	0	0	0	0	0	0	0	0	0	0	0.028397	0.00741523	0	0.0209221	0.00718915	0.00330526	0.00268264	0	0.0114225	0.00826218	0	0	0	0.00609924	0.072977	0
RNF2	0.0253946	207	0.127014	0	0.0172194	0.0460346	0.033997	0.0959198	0.0582649	0.127014	0.0331491	0.037383	0.0762688	0.0164338	0	0.00865424	0.0323036	0.0137975	0.031709	0.0807615	0	0.0810526	0	0	0.0198246	0.0405996	0.0881501	0	0.00903558	0.0529468	0	0.0153122	0.0442445	0.0216382	0.0303652	0.0682105	0.0509889	0.00711947	0.0171325	0.0163774	0.0895263	0.0220772	0.0264525	0.0434084	0.00590821	0	0.0365514	0	0
RNF20	0.0249027	211	0.12499	0.103581	0.0887781	0.0451576	0.101405	0	0	0	0.0762121	0.0542795	0.0352951	0.0818374	0	0.0179596	0.0502979	0.0108085	0.0170793	0	0	0.0229055	0	0	0.019621	0.0813434	0	0	0.018553	0.0670534	0	0.0169592	0.023153	0.0643201	0.0643468	0	0.0492586	0.0268883	0.00771692	0.0137343	0.0634746	0.0315074	0.00917423	0.0149445	0.0171399	0	0.0292103	0	0
RNF213	0.123053	31	0.651902	0.107588	0.162473	0.233761	0.227907	0.220429	0.0898878	0.127014	0.303988	0.0488619	0.19759	0.137676	0	0.26737	0.12248	0.138903	0.143516	0	0	0.022515	0.0377301	0.175025	0.260072	0.105606	0.267073	0	0.0364885	0	0.651902	0.104566	0.0434955	0.102962	0.127715	0.0316614	0.21274	0.0309641	0.119332	0.0748663	0	0.0844837	0.0780727	0.132966	0.0781501	0.104558	0.0807617	0.0521467	0.556068
RNF214	0.0224908	225	0.165664	0.165664	0	0.0267048	0.0229181	0	0.0848021	0	0.0115451	0.0701849	0.0388972	0.065596	0	0.0165867	0.0265737	0.0314648	0.0193302	0	0	0.0228911	0.0230893	0	0.0492349	0.0427581	0.0686485	0	0.0223258	0.118703	0	0	0	0.0306428	0.00309201	0	0.028434	0.0194687	0.0285532	0.0163063	0	0	0.0105764	0.0239452	0.0500418	0	0.010341	0.0127491	0
RNF215	0.000785193	465	0.0263152	0	0	0	0	0	0	0	0	0	0	0	0	0	0	0	0	0	0	0	0	0	0	0	0	0	0	0	0	0	0.0263152	0.00237424	0	0	0	0	0.00315283	0.00113219	0	0	0	0	0	0	0	0	0
RNF216	0.031405	171	0.273133	0	0.0234151	0.0618404	0.0783327	0.0776589	0	0	0.0491313	0.0311756	0.0967327	0.0575598	0	0.0496494	0.0270455	0.0478909	0.02353	0	0.0712281	0.126863	0.0291995	0.0358854	0.0246098	0	0.0790805	0.0505608	0.0374517	0.05031	0.273133	0.0547208	0.0281021	0.0189873	0.0321671	0.0350226	0.0477249	0.0357011	0.0124924	0.0190282	0.0993296	0.031621	0.0424111	0.0142081	0.0297045	0	0.0182974	0.0221887	0
RNF217	0.00868909	358	0.162565	0	0	0	0	0	0	0	0	0	0	0	0	0.00890247	0.00169552	0	0	0	0	0	0	0	0	0	0	0	0.0203041	0.0246353	0	0.0257849	0	0.0568825	0.0764774	0.0664424	0.0277358	0.0229449	0	0	0.0660693	0	0	0	0	0.069303	0	0	0
RNF219	0.0150714	284	0.491252	0	0	0.00765959	0	0.047806	0	0	0.0326143	0	0.0333255	0	0	0.00910501	0.0133356	0.0184891	0	0	0.0654989	0.0247735	0	0	0.0327059	0	0	0	0.0452348	0.0648165	0	0.0140181	0	0.0467388	0.0206474	0	0.033209	0.0445969	0	0.00839694	0.0303365	0.0384555	0.0174375	0.00994805	0.0106192	0	0.0442749	0	0
RNF220	0.0587921	80	0.32055	0	0.0320778	0.0698368	0.0901473	0.101746	0.0613242	0.198916	0.0342234	0.106218	0	0.0213175	0.125476	0.0165708	0.0427825	0.0149187	0.0358499	0	0.0806581	0.0240932	0.0576839	0	0.0373982	0	0.0367268	0	0.0415004	0	0	0.033627	0.0690498	0.0442761	0.0784948	0.0764216	0.0408956	0.0537273	0.0754696	0.0619786	0.199364	0.0483794	0.0956565	0.0404577	0.0401162	0.32055	0.172005	0.0414239	0.130228
RNF24	0.0759324	56	0.481932	0	0.0934042	0.164788	0.0493483	0.192133	0	0.300455	0.0336869	0.0853816	0.0198923	0.083369	0	0.0988112	0.0982894	0.0245625	0.0582221	0	0	0.109985	0	0.132092	0.0124293	0	0.0371648	0.0529799	0.192455	0.173936	0	0.396206	0.0496049	0.375512	0.481932	0.112248	0.106917	0.162765	0.00326089	0.00611143	0.0422046	0.287372	0	0	0.00692329	0	0.0113355	0.189747	0
RNF25	0.0267084	192	0.121071	0.121071	0.0609359	0.0915341	0.0867526	0.052506	0	0	0.0351602	0.0314767	0.016907	0.0421555	0	0.0355147	0.0330351	0.0269911	0.0579795	0.0644444	0.0583237	0	0.0272789	0.0380514	0.0372384	0	0.0818532	0	0	0.0315173	0	0.0154085	0.0215566	0.0164601	0.00446372	0	0.0101611	0	0.010594	0.0374435	0	0.0103716	0.063245	0.0369761	0.0786365	0.0303329	0.0230624	0.0205483	0
RNF26	0.0312896	172	0.342968	0	0	0.0287147	0.0635358	0	0	0	0.0348127	0.0339908	0	0.0378568	0	0.0325122	0.0169902	0.0258246	0.0130096	0	0.0541916	0.0388181	0	0	0.025622	0.0371122	0	0	0.125085	0.0350843	0	0.0575115	0	0.041494	0.0516486	0.0753062	0.0239792	0.0322333	0.0152186	0.0348271	0.342968	0.126561	0.0207649	0.0599415	0.0392103	0.125631	0.0172336	0.0145246	0
RNF34	0.0848229	51	0.355512	0.355512	0.148626	0.0841901	0.218305	0.0889908	0.145962	0	0.0898496	0.0194703	0.0393327	0.188792	0	0.0692828	0.0567626	0.0415054	0.0547256	0.0660301	0.118259	0.0352244	0.110554	0.141587	0.107872	0.0834128	0.0444236	0.0524902	0.0231877	0.154446	0	0.0177776	0.149301	0.0705997	0.0625907	0	0.0907904	0.0844611	0.091566	0.115762	0.298801	0.0951008	0.157783	0.123764	0.130185	0.166207	0.109624	0.0673103	0.164105
RNF38	0.0229639	223	0.141437	0	0.0320985	0.0298551	0.025058	0.0550185	0	0	0.0115382	0.0185758	0	0.0206767	0	0	0.0239001	0.0194462	0.0100106	0	0	0.0189474	0.0295806	0.0372544	0.0059045	0.0420047	0.141437	0	0.0163068	0	0	0.0322516	0.0521906	0.0479756	0.0751326	0	0.0721315	0.0518999	0.00313896	0.00877909	0.0570497	0.0209091	0	0.0178611	0.0199229	0.0342486	0	0.066014	0
RNF4	0.106909	38	0.970743	0.970743	0.121339	0.136988	0.123105	0	0.119366	0	0.233926	0.0623261	0.160784	0.0950427	0.14032	0.0792909	0.0735461	0.0798436	0.0969301	0.121613	0.145355	0.0227635	0.0882737	0.140509	0.125477	0.147012	0.040093	0	0.0402406	0.063577	0	0.0268649	0.0931656	0.13817	0.102633	0.100005	0.0730236	0.0882788	0.0783181	0.12306	0.0772703	0.14258	0.119338	0.0857187	0.120632	0.208037	0.0817515	0.0979309	0.103739
RNF40	0.0431166	119	0.181062	0	0.032586	0.0964349	0.0755342	0.177287	0	0	0.0718061	0.0649745	0	0.0584664	0	0.042545	0.064401	0.0422936	0.0480054	0.0559795	0	0.0854776	0.0272659	0.110053	0.0383923	0.127205	0	0	0.121024	0.0823919	0	0.0578539	0.0710293	0.0494813	0.109316	0.0594416	0.0213889	0.0539781	0.0275742	0.0215072	0.181062	0.0400499	0.0373463	0.0178578	0.0326364	0.0965293	0.0187507	0	0
RNF41	0.0463399	108	0.158996	0.112618	0.158996	0.0620771	0.0788673	0.0791914	0.0639992	0.127014	0.10199	0.0669354	0.0767226	0.0357024	0	0.0633092	0.0521061	0.0517061	0.0420654	0	0	0.0663809	0.0909877	0.0348339	0.0525117	0.0397388	0.126306	0	0.0411067	0.0757302	0	0.0446825	0.0746668	0.0427861	0.0436424	0	0.018648	0.0553305	0.0442074	0.034883	0.154225	0.0936405	0.0351131	0.0530199	0.0829752	0.0420771	0.0415719	0.0221145	0.0447331
RNF44	0.0997393	40	0.537485	0.112618	0.163818	0.299343	0.537485	0.451962	0.277649	0.127014	0.316734	0.130345	0.183027	0.221462	0	0.247165	0.215582	0.163983	0.185817	0.0703641	0.0642576	0.299976	0.160142	0.0722896	0.321374	0.340768	0.234031	0	0.101346	0.0886777	0	0.0402873	0.0262779	0.170337	0.194982	0	0.0598916	0.0952941	0.00732388	0.00626738	0	0.107035	0.00982891	0.00395405	0.0150566	0.115935	0.0106081	0.0466453	0
RNF5	0.180278	15	0.751345	0.479644	0.138715	0.241612	0.263905	0.093375	0.329461	0	0.213854	0.193848	0.223489	0.20926	0.280843	0.143943	0.174391	0.224054	0.163951	0.295321	0.382793	0.149192	0.0886641	0.107634	0.208482	0.184493	0.0725073	0.148863	0.112148	0.0254838	0	0.101191	0.0712363	0.0744361	0.138608	0.199212	0.116618	0.130365	0.175122	0.204275	0.145711	0.0712129	0.10463	0.218435	0.217711	0.177497	0.161721	0.126904	0.228571
RNF6	0.0707962	61	0.361903	0.120792	0.154482	0.0916798	0.194692	0.203488	0.119669	0.361903	0.114248	0.0673505	0.124234	0.077823	0	0.0440859	0.0611361	0.024281	0.0793445	0.0703641	0.0654989	0.0674967	0.0895055	0	0.0495907	0.123872	0.11122	0	0.0414035	0.0221693	0	0.0592166	0.0326131	0.0814067	0.0695038	0.0984877	0.0876604	0.0266135	0.0439986	0.0513929	0.100842	0.0546011	0.0776348	0.0878151	0.0783545	0.0668166	0.0720002	0	0.0914018
RNF7	0.300493	7	0.591511	0.47691	0.271601	0.504277	0.543621	0.514158	0.382983	0.420509	0.389995	0.294513	0.340426	0.268922	0.274274	0.43633	0.385282	0.287224	0.366487	0.0840522	0.309139	0.294126	0.430975	0.519263	0.365293	0.199195	0.201376	0.220735	0.267987	0.289395	0	0.27578	0.200603	0.148214	0.200772	0.353269	0.373584	0.232658	0.287158	0.235602	0.21728	0.266293	0.268027	0.363006	0.264942	0.212355	0.297484	0.245687	0.156014
RNF8	0.0231426	221	0.124551	0.103581	0.0448647	0.0206046	0.0191034	0	0	0	0.0816668	0.0185064	0.0152054	0.0359345	0	0	0.0178671	0.0157874	0.00914383	0	0	0	0.0301749	0.0310795	0.0368717	0.0423129	0	0	0.0213512	0.0325084	0	0	0.012504	0.0338949	0.030662	0.0265514	0.00990015	0.0121161	0.017142	0.0323591	0.0709704	0.0340645	0	0.0221926	0.0363371	0.0368844	0.0211008	0	0
RNFT1	0.0529362	90	0.161739	0	0.0616214	0.161739	0.0752537	0.0718005	0	0	0.0593004	0.0561439	0.059464	0.103377	0	0.121779	0.0906148	0.0864518	0.0999832	0.0568147	0	0.0463322	0.0284974	0	0.0515359	0.0394899	0	0	0.077941	0.0693312	0	0.0628998	0.0243365	0.047475	0.0331453	0	0.0358825	0.0125554	0.0166544	0.0312666	0	0.118564	0.0592706	0.0340682	0.0150504	0.0584481	0.0780333	0.0690083	0
RSPRY1	0.036421	152	0.167724	0	0.0589548	0.0517674	0.0391775	0.127769	0.167724	0	0.0253954	0.0334827	0	0.0211692	0	0.053831	0.0393595	0.0425885	0.0454988	0.0767882	0.0599358	0.0817817	0.0318768	0.0310368	0.0376649	0	0	0	0.0674283	0.0551216	0	0.0299319	0	0.0334996	0.0379376	0.0634878	0.0601477	0.0566524	0.0311303	0.0341166	0	0.0336875	0.0429133	0.0136048	0.0173921	0.10373	0.0315338	0.0206991	0.160107
SF3B3	0.0651525	71	0.518356	0.224652	0.05911	0.0716774	0.0609849	0.0547559	0	0	0.111164	0.0883679	0.0561611	0.036799	0	0.0391509	0.0524079	0.0875107	0.0529865	0	0	0.0407604	0.0656591	0.0367295	0.0631084	0.0802385	0.0808346	0.0504856	0.0643122	0.110073	0	0.0496521	0.0797156	0.124285	0.0591951	0.191419	0.058654	0.135086	0.0536376	0.0586075	0.507367	0.0320118	0.0723143	0.087233	0.0788762	0.0633176	0.104593	0.0127491	0.319327
SH3RF1	0.00537232	390	0.0375852	0	0	0	0	0	0	0	0	0.0154563	0	0	0	0	0.00817755	0.00444209	0.00420571	0	0	0	0	0	0	0	0	0	0	0	0	0	0	0	0.0049266	0	0.0255267	0.0174864	0.00304887	0.00381806	0	0.0114648	0	0	0	0	0	0	0
SHKBP1	0.146225	21	0.521589	0.225352	0.12594	0.484186	0.284312	0.521589	0.204847	0	0.181506	0.231198	0.295967	0.132833	0.136467	0.218096	0.319007	0.215289	0.290044	0.1409	0.279139	0.130212	0.203973	0.0691466	0.137666	0.0388896	0.15285	0.0523646	0.157311	0.213231	0	0.179776	0	0.10213	0.121865	0.112434	0.0842714	0.0649996	0.050695	0.0637245	0	0.264403	0.041316	0.042324	0.0337827	0.106601	0.164273	0.313807	0.276891
SHPRH	0.0126911	314	0.115443	0	0	0	0	0	0	0	0	0	0	0.0192503	0	0	0.0176549	0.0144937	0.00963549	0	0	0	0.0645459	0	0.0232819	0	0	0	0.0111733	0.0349044	0	0	0.0235715	0.00525001	0.0310981	0	0.0132679	0.0336649	0.0112786	0.00572312	0	0	0.00626973	0	0	0	0.0188088	0.0216928	0
SIAH1	0.0201998	239	0.176564	0	0	0	0	0	0	0	0	0.0174341	0.0189639	0	0	0.0416244	0.0131631	0.0365147	0	0	0.0746598	0.0439671	0.0564772	0	0.0130372	0	0	0	0.0117317	0	0	0	0	0.00344061	0.0257078	0.0707669	0.0304757	0.0524005	0.0145156	0.013243	0.0951996	0.022439	0.015919	0.0270207	0.0130561	0.0683943	0.00907668	0	0
SIAH2	0.0520303	92	0.269577	0	0.032586	0.0376275	0.0217798	0.0456733	0	0	0.0129422	0.0325238	0.0404194	0.0214694	0	0.0503093	0.0481239	0.0251416	0.0434247	0	0	0.039467	0.0798083	0.0372544	0.0189707	0.0362227	0.0809804	0	0.0262233	0.0342982	0	0	0.0620567	0.061538	0.0768727	0.0397388	0.049193	0.0112305	0.0287655	0.0316178	0.185964	0.0142597	0.0328628	0.0599127	0.0371094	0.149273	0.0434915	0	0.0447331
SKP2	0.0293303	182	0.216033	0.173087	0	0.0404421	0	0	0.0888217	0.186327	0.0236941	0	0	0.0206632	0	0.0239224	0.0228723	0.0199583	0.0156271	0	0	0.0167995	0	0	0.0189707	0.0420047	0	0	0.0216824	0	0	0	0.0272385	0.0604177	0.0326229	0.0509207	0.0361692	0.0673937	0.0435539	0.0394628	0.127433	0.0440188	0.0362489	0.0191302	0.0390454	0	0.0433508	0	0
SMURF1	0.00449119	400	0.0809933	0	0	0	0	0	0	0	0	0	0	0	0	0	0	0	0.0088663	0	0	0.0208114	0	0	0	0	0.0809933	0	0.0172278	0	0	0.0118577	0	0.00395912	0.00904396	0	0	0	0	0.000917531	0	0	0.0346773	0	0	0.0388405	0	0	0
SMURF2	0.0144017	292	0.0656922	0	0	0.0265024	0	0	0	0	0.0533114	0	0.0202239	0.0187198	0	0.0164423	0.0135704	0.0270533	0.0140516	0	0	0.0656922	0.0303022	0	0.0254653	0	0.034814	0	0.0163821	0	0	0	0	0.0280835	0.0413517	0	0.0104796	0.0261977	0.00876044	0.00780518	0	0.0135531	0.00917423	0.00502655	0.00643058	0	0	0	0
SOCS1	0.00482757	395	0.115443	0	0.085955	0.00337781	0.0154903	0	0.0802703	0	0.0563503	0	0	0	0	0	0	0	0.00479847	0	0	0	0.0245775	0	0.00644128	0	0	0	0	0	0	0	0	0	0	0	0	0	0.00250656	0.000898539	0	0.009773	0.0166673	0.00429722	0	0	0	0.0234326	0
SOCS3	0.1073	37	0.339554	0	0	0.048868	0.0168964	0.101917	0	0	0.0130689	0.0321885	0	0.0427075	0	0.0164425	0.019069	0.0213765	0.0266228	0	0	0	0.0252759	0	0	0.0364672	0	0	0	0	0	0	0	0.00408707	0	0	0.0106351	0	0.136756	0.141666	0.0541005	0.0135531	0.138551	0.147993	0.104116	0.0420771	0.0210771	0.088584	0.100216
SOCS4	0.0217473	227	0.14992	0	0	0	0	0	0	0	0	0.0181936	0	0	0	0.00618242	0.0137881	0.00522081	0.00961132	0	0	0	0	0.0383305	0.00650973	0	0.0397228	0	0.0113181	0	0	0	0	0.0619904	0.0576925	0.0322989	0.0455837	0.0393143	0.022104	0.0157038	0.115005	0.0581941	0.0178656	0.0331695	0.0498799	0	0.00803174	0	0
SOCS5	0.0112447	332	0.0826218	0	0	0	0	0	0	0	0	0	0.0179127	0	0	0.00618242	0.00332014	0.0138415	0.0088236	0	0	0.0178474	0.031662	0	0.0134946	0.0394899	0	0	0	0.0320596	0	0	0.0209855	0.0286328	0.024675	0	0	0.0148167	0.00551486	0.0055221	0.0391203	0.0131167	0.0168719	0.00706217	0	0	0.0155131	0.0244411	0
SOCS6	0.00761245	368	0.0993989	0	0	0	0	0	0	0	0	0.0183366	0	0	0	0	0.00986226	0.0360009	0.0087665	0	0.0710139	0	0.0617949	0	0	0	0	0	0.0097122	0	0	0	0.0237744	0.0160865	0	0.0381415	0.0424327	0.0208138	0.00576907	0	0.0993989	0	0	0	0.00492281	0	0	0	0
SOCS7	0.00588663	385	0.024098	0	0	0	0	0	0	0	0	0.0179805	0.0201673	0.0202715	0	0.0181103	0.00749103	0.00460659	0.00365699	0	0	0.0219559	0	0	0	0	0	0	0	0	0	0	0	0.00881795	0.0122829	0	0.0208996	0.0224568	0.00935252	0.00420748	0	0	0	0.0137937	0.00978889	0	0	0.024098	0
SPOP	0.144964	22	0.463581	0.195732	0.123862	0.138218	0.232534	0.394901	0.13856	0.139518	0.174669	0.0937287	0.163212	0.136353	0	0.113294	0.151312	0.14552	0.148599	0.191394	0.0712281	0.116747	0.192891	0.104971	0.125423	0.237369	0.0440491	0.0389795	0.0966044	0.0791726	0.321016	0.0425729	0.169142	0.0767135	0.0860871	0.182119	0.198574	0.125083	0.143804	0.177158	0.463581	0.0656313	0.266412	0.182049	0.15061	0.264174	0.166643	0.0721181	0.0986815
SPOPL	0.032208	167	0.712484	0	0	0.0598912	0.0590248	0.183374	0.0628334	0	0.0201935	0.0144631	0.0333748	0	0	0.0259808	0.0458944	0.0155109	0.0478872	0.0721109	0	0.108916	0.0252759	0	0.0300888	0	0.117951	0	0.0201823	0.0906991	0.335155	0.0308096	0	0.0595685	0.157615	0.0359107	0.0547696	0.0207074	0.0044277	0.0116737	0.0540027	0.0940073	0.0263608	0.00940498	0.00823117	0	0.0221872	0.138768	0
SPSB1	0.0171758	270	0.0781542	0	0	0	0	0	0	0	0	0	0	0	0	0.00864438	0.00178779	0	0	0	0	0	0	0	0	0	0	0	0	0	0	0	0	0	0	0	0	0	0.054103	0.0442709	0	0	0.0339905	0.0131572	0.0230011	0.0781542	0.0157596	0	0.0543811
SPSB3	0.0853145	50	0.334745	0.311837	0.326616	0.249929	0.241267	0.256195	0.279318	0.172291	0.2991	0.100048	0.093194	0.121868	0.125476	0.0397849	0.10651	0.171912	0.0908271	0	0.212391	0.109678	0.0925755	0.110465	0.234117	0.177802	0.160453	0.0673982	0.122433	0.0718255	0.334745	0.119233	0.0432129	0.0347459	0.0769238	0.0286375	0.0608562	0.0544255	0.0353679	0.0487249	0	0.0851792	0.117353	0.0667661	0.0608767	0.0942301	0.0609129	0.0248132	0
STUB1	0.0661938	69	0.496786	0.496786	0.159389	0.169055	0.210886	0.262316	0.18456	0.156167	0.272082	0.107175	0.0507157	0.0392316	0.128209	0.0246818	0.0436986	0.0367934	0.0667979	0.0728079	0	0.0231539	0.0311458	0	0.074739	0.081273	0.0845898	0.0967174	0.0985142	0.0545027	0	0.0270016	0.125861	0.0491352	0.0380027	0	0.0967019	0.0409518	0.0536217	0.0632288	0.0849098	0.0794749	0.0536482	0.0456141	0.0581183	0.113882	0.0445389	0	0.0543811
SYVN1	0.558404	3	1.37872	0	0.219386	0.0687873	0.0215777	0	0.13495	0.229191	0.0617891	0.0277201	0.0363458	0	0.378728	0.0662399	0.0441838	0.0430579	0.0338348	0.0720855	0.0583237	0.0178474	0.106098	0.139442	0.037846	0.0397388	0	0.337442	0.116395	0.243847	0.267755	0.0519539	0.289192	0.0511893	0.032605	0	0	0.0124421	1.05698	1.14618	0.455279	0.190946	0.83876	1.37872	1.18599	0.707707	0.799501	0.31694	0.381491
TCEB3	0.0416888	124	0.108436	0	0	0.0215065	0.031413	0	0	0	0.0626909	0.0373869	0.0539467	0.0162465	0	0.0555337	0.0416909	0.0280579	0.0313749	0	0	0.0203936	0.0230893	0.0993707	0.0193185	0.108436	0	0	0.0255275	0.0631106	0	0.0153441	0	0.0441146	0.0633574	0.0220882	0.0406582	0.0526907	0.039962	0.0457052	0	0.0232713	0.0505741	0.0487265	0.0399837	0.0448253	0.025457	0.0233997	0.0543811
TNFAIP1	0.0409122	128	0.654478	0	0	0.0258169	0.0235406	0	0	0	0	0.018359	0	0	0.136102	0.042176	0.0154763	0.0201142	0.00942991	0	0	0	0.032119	0.0658707	0.00664964	0.0485361	0	0	0	0.0345106	0	0	0	0.0180477	0.0172683	0	0	0.0172098	0.0114732	0.0109123	0.0709704	0.0128571	0.0115442	0.0156349	0.0105889	0	0.0201418	0	0
TNFAIP3	0.0773375	54	0.490394	0	0	0.0611808	0.103228	0.047806	0.220859	0.165331	0.106553	0.0486733	0.0161943	0.0559883	0	0	0.0192161	0.0282475	0.017633	0	0	0.0602329	0	0	0.0325	0.0430865	0.0355433	0.108989	0.0118866	0	0.273133	0	0.0268642	0.00886968	0.0270064	0.0383632	0.0135166	0.00764834	0.0319279	0.034111	0	0.0127044	0.0945318	0.0335848	0.0636196	0	0.0141716	0.0507185	0
TOPORS	0.0327615	165	0.211879	0	0.101879	0.0413265	0.014385	0.0997267	0	0.127014	0.0510515	0.0311071	0.0189184	0.0184434	0	0.0166072	0.0296206	0.0190863	0.0331903	0	0	0	0	0	0.00647748	0	0.040093	0	0.0108833	0.0259664	0	0.0285313	0.0412847	0.0511219	0.0226672	0.0589467	0.00911549	0.0489275	0.0217637	0.0259221	0.196002	0.0115036	0.0336861	0.0222959	0.00981485	0	0.0261201	0	0.111681
TRAF3	0.0309337	175	0.145269	0	0.0250256	0.0388563	0.0311992	0	0	0	0.0223976	0.0365563	0.019391	0.0835802	0.134149	0.0179447	0.0239963	0.0141086	0.0285922	0.0559795	0	0.0446274	0.0235848	0	0.00657116	0	0	0	0.030099	0	0	0.0542462	0.0284588	0.0650464	0.0441459	0	0.0131576	0.0138239	0.0165213	0.0269209	0.145269	0.021559	0.048246	0.0272402	0.0360611	0.0399661	0.0541073	0	0
TRAF4	0.0197545	245	0.611293	0	0.0599958	0.0240272	0.0642958	0.0881485	0.611293	0	0.0328162	0.0157514	0.0160636	0	0.122086	0	0.00149897	0	0.00508724	0.0767882	0	0	0.0220236	0	0.017863	0.0859442	0	0	0.0106934	0	0	0	0	0	0.00266539	0.137114	0.0113432	0.011364	0.0152605	0.0184685	0	0	0	0.0198593	0.0222652	0.0388405	0.0435379	0	0
TRAF5	0.0125552	316	0.182795	0	0.173896	0.00876046	0	0	0.0628334	0	0.0296609	0.0364336	0	0.182795	0.136102	0.0329163	0.00325518	0.0189652	0.00475216	0	0.0619	0	0.112524	0	0.0301899	0.0397137	0	0	0	0.0331457	0	0	0	0.00414767	0	0	0.0131576	0.00592548	0.00245026	0	0.0499026	0.0117857	0.0752301	0.00445503	0	0	0.00986658	0	0
TRAF6	0.0152264	282	0.143693	0	0.0290238	0.0249324	0.0232278	0	0	0	0.0340626	0	0.0197073	0.0153296	0	0.0075701	0.0162268	0	0.0142139	0.0796857	0	0.0168558	0.0309669	0.0356401	0.0266536	0	0.0805873	0	0.0293001	0	0	0	0.0134838	0.00466842	0.0348803	0	0.0272582	0.0120087	0.00485734	0.0129694	0.0615875	0.0115075	0.0124881	0.00480578	0.00729165	0	0.016382	0.0233235	0
TRAF7	0.0564479	83	0.201266	0	0.140736	0.193708	0.189024	0.138792	0.144458	0	0.0857995	0	0.0359062	0.0753042	0	0.0803585	0.0790471	0.0781092	0.0777776	0.0767882	0	0.081998	0.0921572	0.0660607	0.0711097	0.155372	0.120627	0.0431296	0.104802	0.0834013	0	0.0577395	0.045706	0.0546712	0.0507774	0.0204013	0.012064	0.017972	0.0312994	0.0216482	0.0933837	0.064142	0.0208026	0.020252	0.026282	0.0448253	0.0373996	0.0696965	0.121934
TRIM11	0.015749	278	0.120792	0.120792	0	0.0706837	0.0943962	0	0	0	0.0513269	0	0.0194156	0.0639908	0	0.00828177	0.0240304	0.0404984	0.0048282	0	0	0.0254855	0.0230893	0.0380238	0.0247225	0.037315	0.0453311	0	0	0	0	0.0481998	0	0.026038	0.021378	0	0	0.0154007	0.00793603	0.00551695	0	0.0354185	0	0.00334115	0.00672369	0	0.00588688	0	0
TRIM13	0.0431009	120	0.276906	0.107588	0.0920717	0.0447392	0.0185067	0.10555	0	0	0.0810399	0	0.0376767	0.0754938	0	0.0325172	0.0304616	0.0425345	0.0344604	0.0559795	0	0.0432726	0.0299431	0	0.037488	0.08444	0	0	0.0214742	0.0269339	0	0.0122545	0.0880063	0.0560045	0.0594487	0	0.0548782	0.0986601	0.046336	0.0411683	0.140757	0.0442576	0.110321	0.0494845	0.0430038	0.0884736	0.0862176	0	0
TRIM2	0.0076493	367	0.166995	0	0	0	0	0	0	0	0	0	0	0	0	0	0	0.0135724	0	0	0	0	0	0	0	0	0	0	0	0	0	0	0	0	0	0	0	0	0	0	0	0	0	0	0	0	0	0	0
TRIM21	0.0439396	115	0.191789	0.191789	0.0639099	0.131483	0.0211346	0.171424	0.0781332	0	0.0704807	0.113676	0.0733846	0.142174	0	0.0883178	0.0759819	0.080941	0.087191	0	0	0.0222232	0.174428	0.144913	0.0646826	0.0348563	0.0824998	0	0.00960178	0.0908946	0	0.0454923	0	0.0141755	0.0282546	0.0373765	0.054863	0.0228063	0.0171562	0.0211215	0.129318	0.138247	0.0673443	0.0138217	0.0127617	0	0.0551825	0.13057	0
TRIM22	0.137992	24	1.43151	0.195732	0.627864	0.561634	0.651564	0.628747	1.43151	0.127014	0.459657	0.329859	0.344616	0.314456	0.252225	0.440471	0.245267	0.266121	0.228058	0.0671962	0.214392	0.126013	0.245139	0.178661	0.241736	0.231899	0.183202	0	0	0	0.273133	0.0160764	0.0476895	0.0356288	0.0698645	0.194673	0.26775	0.0547758	0.00270562	0.00934936	0	0.0222145	0.0727297	0	0	0.0811539	0.247785	0.0646772	0.116939
TRIM23	0.012932	311	0.0788599	0	0	0	0	0	0	0	0	0.0181719	0.0169548	0.0212577	0	0.0189633	0.0150141	0.00487414	0.00925274	0	0	0.0219062	0	0	0.0252364	0.0315016	0.0385617	0	0	0	0	0	0.0307331	0.0189703	0.0341813	0	0.0113588	0.00737979	0.0129293	0.0140324	0.0788599	0.0532755	0.0284366	0.0147145	0.00765235	0	0.0289424	0.0474435	0
TRIM24	0.00942062	350	0.085229	0	0	0	0	0	0	0	0	0	0	0	0	0.0164098	0.00687993	0	0	0	0	0	0.029996	0	0.0329533	0	0.085229	0	0.0210719	0	0	0.0175602	0	0.0184936	0.0507445	0	0	0.0558357	0.00325111	0.00470936	0.03815	0	0	0	0	0	0	0	0
TRIM25	0.0411754	126	0.19336	0	0.0604875	0.0909462	0.0642355	0.107915	0.131258	0	0.0251737	0.0509956	0	0	0	0.0655405	0.0539582	0.0524289	0.0452146	0	0	0.040447	0.0331561	0.0326962	0.0462839	0.0359651	0.0457771	0.0566244	0.00720919	0.0318508	0	0	0	0.0331203	0.0768895	0	0.064961	0.0427839	0.00624861	0.0283388	0	0.0729098	0.0340724	0.0133987	0.0282378	0.133401	0.0407633	0.133825	0
TRIM26	0.040269	131	0.273133	0	0.120107	0.0835969	0.108654	0.0922534	0	0	0.0685733	0.0374977	0	0.019229	0.130117	0.0819887	0.0447987	0.0700914	0.0456968	0	0.0665326	0.0222623	0.109897	0.112764	0.086581	0.0772426	0	0	0.0458444	0.0813057	0.273133	0.0334	0	0.0536843	0.0511504	0	0.026495	0.0266228	0.0262705	0.0294542	0.0459737	0.0358767	0	0.0318619	0.0246464	0.0604302	0.0474898	0.0221887	0
TRIM27	0.0855619	49	0.576186	0.225404	0.117717	0.218307	0.290615	0.156252	0.576186	0	0.0884533	0.105472	0.124333	0.099134	0	0.101647	0.159253	0.112448	0.093286	0.368453	0.0796817	0.063721	0.0288494	0.256659	0.124413	0.16126	0.0448393	0.0960286	0.040404	0.119785	0	0.171207	0.120452	0.0954782	0.111844	0.0646179	0.0664392	0.0654404	0.0607943	0.05905	0.0944594	0.0444549	0.0337731	0.0585353	0.0606336	0	0.0452957	0.0437685	0.107664
TRIM28	0.0565628	82	0.491252	0.216111	0	0.0518153	0.055709	0	0	0.330187	0.0197689	0.0191259	0.0570389	0.0400764	0.14032	0.0541768	0.0347028	0.0344853	0.0439289	0	0.0642576	0.0405907	0.0585901	0.0744921	0.0526892	0	0	0.0529368	0.137702	0.0509087	0.328987	0.0854392	0.0582093	0.170436	0.148075	0.204068	0.0865387	0.119472	0.041801	0.0474157	0.237815	0.0617774	0.0402404	0.0457634	0.0530293	0.111064	0.0592855	0	0
TRIM3	0.00331179	417	0.0867253	0	0	0	0	0	0	0	0	0	0	0	0	0.00865424	0.00145113	0	0.00490846	0	0	0.0425322	0	0	0.00529933	0	0	0	0	0	0	0	0	0.0169202	0.00627495	0.0403586	0	0.00692771	0	0.00222425	0	0	0.0126204	0	0	0	0	0	0
TRIM32	0.00714966	372	0.04695	0	0	0	0	0	0	0	0	0	0	0	0	0	0.0059383	0.00463352	0	0	0	0	0	0	0.00680082	0	0	0	0	0	0	0	0	0.00224602	0.00294131	0	0	0.0140921	0.00858833	0.0102133	0	0.00792964	0.0203108	0.00552542	0.00533878	0	0.00737564	0	0.0447331
TRIM33	0.0377501	139	0.294158	0.294158	0.0332851	0.0470779	0.0241164	0.0975778	0.0628334	0.16807	0.0596224	0.045891	0	0.0804403	0	0.0170914	0.025845	0	0.0506004	0	0.0746598	0.0430473	0.061996	0.0365122	0.00513342	0	0	0.0404126	0.0306515	0.0321614	0	0.0281957	0.0263152	0.13048	0.173851	0.15228	0.19161	0.0732326	0.0169416	0.00846642	0.103023	0.0785944	0.0277635	0.0240498	0.0263932	0	0.00779815	0.0460432	0.130228
TRIM35	0.0111436	333	0.0858839	0	0.062472	0.0237784	0.0154903	0	0	0	0.020663	0.0294915	0	0.018858	0	0	0.00863355	0.0218162	0.0135374	0	0	0.0223279	0	0	0.0189043	0.0335779	0.0444236	0	0.0109671	0	0	0.0327637	0.023153	0.0183296	0.0347284	0.0789477	0	0.0145509	0.00573566	0.00463149	0	0.0120481	0.0146966	0	0.0115307	0.0787553	0	0	0
TRIM36	0.00229778	439	0.0271117	0	0	0	0	0	0	0	0	0	0	0	0	0	0	0.0197502	0.00464251	0	0	0	0	0	0	0	0	0	0	0	0	0	0	0	0	0	0	0	0	0.00482802	0	0	0	0	0	0	0.00561897	0	0
TRIM37	0.0152008	283	0.143255	0.117352	0.0319346	0.026575	0	0	0	0.127014	0.0355357	0	0	0	0.143255	0.0154382	0.0169959	0.0049084	0.0091806	0	0	0	0.0288027	0.0301933	0.0129198	0.0824926	0	0	0	0	0	0	0	0.0130209	0.0347231	0	0.0118377	0.0149187	0.0132816	0.0127541	0	0.021941	0.0102571	0.0246082	0.0227618	0.0417152	0.00695171	0	0
TRIM38	0.0692375	65	0.273133	0.186759	0.228289	0.164759	0.230111	0.0456733	0.0639992	0.156167	0.0990579	0.0562443	0.180839	0.0427316	0	0.127033	0.0803833	0.0808383	0.0918607	0	0.15362	0.0441377	0.120295	0.067094	0.0370836	0.0400964	0	0	0.0652352	0.09236	0.273133	0.0591616	0.0766118	0.108068	0.114783	0.0728662	0.146415	0.075789	0.0304949	0.0319487	0	0.0706759	0.0372613	0.0293712	0.0455181	0.0757353	0.0705484	0.0913347	0
TRIM39	0.0143009	293	0.12813	0	0	0.00764637	0.0436538	0	0	0	0	0.0137575	0.0591661	0.0214234	0	0	0.0133127	0.00522081	0	0.0572098	0	0	0.0551775	0	0.0128465	0	0	0.0951356	0.0314669	0	0	0.0160301	0.0224504	0.0231465	0.00453765	0.0289403	0.0321258	0.0149971	0.0240018	0.00696422	0.0615875	0.0323478	0.015157	0.00410711	0.00540301	0	0.0206862	0	0
TRIM4	0.0272085	189	0.170983	0.103581	0.05844	0.0692379	0.133992	0.137216	0.0611442	0	0.0379265	0	0	0.0409239	0.157268	0.0425519	0.03452	0.044506	0.0338453	0	0.0806581	0.0476391	0.119105	0.0716607	0.071518	0.0705705	0.0410916	0.0574875	0.0290574	0	0	0	0	0.0244401	0.0527474	0.0537426	0.025437	0.0242637	0.0097583	0.00978638	0.170983	0	0	0.00807538	0.0143817	0	0.0137734	0	0
TRIM41	0.0175189	266	0.321016	0	0.0280374	0.0160698	0.0298151	0	0	0	0.0242942	0.0779278	0.0202239	0.0345066	0	0	0.0146246	0.00928175	0.0142481	0	0	0.016822	0.0550358	0	0.0189522	0	0	0	0.0379538	0.0221341	0.321016	0.0152569	0	0.0657424	0.0752786	0.0322858	0.0118317	0.0314966	0.00494998	0.0132808	0	0.0290039	0.0213468	0.00889184	0.00680115	0	0.0105424	0	0
TRIM47	0.0140656	298	0.0900661	0	0	0	0	0	0	0	0	0	0	0	0	0.00893518	0	0	0	0	0	0	0	0	0	0	0.0380193	0	0	0	0	0	0	0	0	0	0	0.00584386	0.039223	0.0319776	0	0	0.0113744	0.036363	0.0215586	0	0.0297595	0	0
TRIM5	0.0196782	247	0.17852	0	0.0345857	0.0723974	0.0414688	0	0.17852	0	0.0344232	0	0.0360242	0.0197508	0	0.0731429	0.0144992	0.0418504	0.0282286	0.0811898	0	0.0235364	0.0318768	0	0.00644128	0.0384982	0.0397228	0.0530015	0	0.0259664	0	0	0	0.0295203	0.0173228	0.0558731	0.00717945	0.0504392	0.0080689	0.0165867	0.160628	0	0	0.0188497	0.00646166	0	0.00811213	0.0178521	0
TRIM50	0	536.5	0	0	0	0	0	0	0	0	0	0	0	0	0	0	0	0	0	0	0	0	0	0	0	0	0	0	0	0	0	0	0	0	0	0	0	0	0	0	0	0	0	0	0	0	0	0	0
TRIM52	0.0137338	302	0.267718	0	0.0261737	0.0186971	0.0826703	0.127472	0	0	0.0115035	0.0146047	0	0.0207721	0.267718	0.00826467	0.0207102	0.0148508	0.00901188	0	0	0.0196567	0.0312265	0.0286928	0.0266798	0.0423129	0.0816498	0	0	0.0221341	0	0.0287159	0.0765226	0.012012	0.0257955	0	0	0.0146399	0.00488071	0.00897649	0	0.00860175	0.0283818	0.00468729	0	0	0.0159756	0	0
TRIM56	0.0632467	73	0.270364	0	0.132954	0.146286	0.0779137	0.0386191	0	0	0.180888	0.049256	0.0736208	0.0413887	0.269649	0.137415	0.0751591	0.0572866	0.057438	0.0780691	0	0.0638153	0.248797	0.0363461	0.0583312	0.12033	0.0744462	0	0.118988	0.103504	0	0.133543	0.0449063	0.150148	0.270364	0.0861093	0.108337	0.0997786	0.0191994	0.0171665	0.167991	0.0333579	0.058738	0.0303559	0.0217223	0.0604302	0.0391861	0.0222167	0.248577
TRIM6	0.00150552	447	0.0549979	0	0	0	0	0	0	0	0	0	0	0	0	0	0.00137614	0	0	0	0.0549979	0	0	0	0	0	0	0	0	0	0	0	0.012504	0.0127445	0.0061247	0	0	0.00769945	0	0.000870881	0	0	0	0	0	0	0	0	0
TRIM65	0.00832393	362	0.110661	0	0.0555724	0.0318486	0.0145295	0	0	0	0.0575403	0	0	0	0	0	0.00822959	0	0.0181611	0	0	0	0	0	0.00538484	0	0	0	0.0103889	0.0276067	0	0.0151023	0.0306098	0.0104599	0.0124997	0	0.0106222	0.0186584	0	0.0034547	0.110661	0	0.0182771	0.0072936	0	0	0.0206227	0	0
TRIM68	0.0067065	376	0.103581	0.103581	0	0.0172863	0.0192435	0	0.0611442	0	0.01278	0.0151586	0	0	0	0.00938163	0.00326328	0	0.00470177	0	0	0	0.0575475	0.0363461	0.0254791	0	0	0.0512723	0.0109249	0	0	0	0.0263152	0	0.0106526	0	0.0167	0	0.00824767	0.00307755	0	0.022118	0.0116752	0.00425855	0	0	0.0107437	0	0
TRIM69	0.044163	114	0.328987	0.291703	0.146169	0.130535	0.180421	0.119011	0	0	0.075284	0.0572328	0.120603	0.0594794	0	0.0610148	0.0466007	0.0428947	0.0311538	0	0	0.0695774	0.089761	0.0303511	0.0584979	0.0392944	0.0906277	0.101795	0	0	0.328987	0	0.0936307	0.0175795	0.0382225	0.0693711	0.0216439	0.0373234	0.0209243	0.032115	0	0.0640951	0.0401684	0.0287285	0.0371062	0.0535735	0.0575275	0.0552501	0
TRIM8	0.0248831	213	0.12065	0	0	0.0570038	0.0696228	0	0.117187	0	0.094788	0.0145717	0.0200834	0.0611203	0	0.0413064	0.0700005	0.0496015	0.0340394	0.0811898	0.0599358	0.0469308	0.0273843	0.0348339	0	0	0.0789862	0	0.010638	0.0254838	0	0.0128614	0.0268345	0.00420267	0.0167212	0	0.022495	0	0.0152086	0.0192117	0.0646872	0.0205891	0.00982443	0.00913921	0.021347	0.0368844	0.00548829	0.12065	0.0543811
TRIP12	0.0697165	63	0.341062	0	0.0165678	0.0439222	0.0391199	0.0518922	0.067747	0.139518	0.0369196	0.016869	0.0895516	0.0834303	0.130117	0.0421305	0.0616679	0.042234	0.0653285	0	0	0.0453186	0	0	0.0316739	0	0	0.113157	0.0894832	0.0180775	0.321016	0.0429606	0.0411012	0.237536	0.223573	0.341062	0.108761	0.0902732	0.0410594	0.0216599	0.141718	0.173422	0.0610826	0.0245196	0.0324788	0.0885453	0.0312815	0.136888	0.0543811
TTC3	0.0748274	57	0.223614	0.0791708	0.0671514	0.059552	0.0195265	0.100631	0.183731	0	0.0443241	0.0444967	0	0.0825906	0	0.0235233	0.0430379	0.0424136	0.0542849	0	0.0654989	0	0.092053	0.0706343	0.087418	0.0377527	0.0786966	0.0576539	0.0233316	0.106382	0	0.0450273	0.0785846	0.150445	0.10978	0.113291	0.133287	0.144112	0.0612302	0.0796204	0.223614	0.0142012	0.0855592	0.107808	0.0775412	0.0576888	0.098556	0	0
TULP4	0.00657536	377	0.0385891	0	0	0	0	0	0	0	0	0	0	0	0	0	0.00649206	0	0.00910812	0	0	0	0	0	0	0	0	0	0	0	0	0	0	0.00224602	0	0.0385891	0	0.00630803	0.00564373	0.0121649	0	0	0	0.00991337	0.00642095	0	0.0104025	0.0145246	0
UBE3A	0.0710598	60	0.292226	0	0.143928	0.11541	0.127182	0.135445	0.0904869	0	0.124949	0.0452723	0.0146722	0.0384272	0	0.112513	0.0490545	0.0558881	0.0504051	0	0.185965	0.0621227	0.0549227	0.0704499	0.0292084	0.075455	0.0462052	0.0523646	0.0726683	0.0692249	0	0.0136514	0.0404714	0.109546	0.11578	0.184251	0.0768072	0.107255	0.0775713	0.0678697	0.206673	0.0821625	0.0298509	0.0408177	0.0363409	0.108321	0.051757	0.0726181	0
UBE3B	0.0367591	148	0.491252	0	0.0663842	0.0386669	0.0706284	0	0	0	0.0170009	0	0	0	0	0.0160374	0.0259757	0.0253247	0.0268876	0.0780051	0	0.0527386	0.0314106	0.110841	0.0200392	0	0.0918855	0	0.0312166	0	0	0.0297278	0.0277908	0.0445745	0.0410336	0.0371727	0	0.0356818	0.0405712	0.0490595	0	0.0362172	0.00679092	0.0573933	0.0187088	0	0.0442922	0.0442661	0
UBE3C	0.0199902	241	0.186327	0.121823	0	0.0168882	0.0191034	0.101017	0.0499282	0.186327	0.0109554	0.0175007	0.016907	0	0	0.0160063	0.019245	0.00568712	0.026937	0	0	0.016822	0	0	0.0186173	0	0	0	0	0	0	0.0774409	0	0.0402709	0.0779903	0.0303124	0.0559147	0.0161375	0.0054323	0.00919521	0.126087	0.0656192	0.00911417	0.0120158	0.00501697	0.147024	0.0174898	0	0
UBE4A	0.0508438	94	0.491252	0	0.0317138	0.0387271	0.087546	0	0.0974981	0	0.0783034	0.0248461	0.0373285	0.0204381	0	0.0265906	0.047436	0.0367758	0.0476294	0.0811898	0.0541916	0.08886	0.0576865	0.0721208	0.0379024	0	0.0417638	0	0.0225907	0	0	0	0.0586535	0.102517	0.112321	0.0272356	0.0227393	0.0306852	0.0643917	0.0470229	0.0615875	0.0418244	0.076858	0.0307717	0.0271661	0	0.0366495	0.089922	0.111681
UBE4B	0.0246271	214	0.173087	0.173087	0	0.0411565	0.0449604	0	0.0556693	0	0.0353199	0	0	0	0	0.0169096	0.0337475	0	0.0265464	0.0541207	0	0.0883164	0.0815852	0.0380514	0.0450369	0.0332727	0.0401558	0	0.0296321	0.0796636	0	0.0165337	0	0.0238236	0.054114	0.0350226	0.00892878	0.00660828	0.0123561	0.0157006	0	0.0274164	0.0234315	0.0284323	0.0279462	0	0.00640344	0.0127491	0
UBR1	0.0130643	309	0.491252	0	0	0	0	0	0	0	0	0	0	0.0216569	0	0	0.00866167	0	0.00975941	0	0	0.0465326	0	0	0.00594513	0	0	0.0455239	0.0306862	0	0	0	0	0.0138074	0.0236444	0.0371727	0.025945	0.00732813	0.0164513	0.0109361	0.134445	0	0.0274821	0.0192081	0.0239861	0.0451199	0.0332656	0	0
UBR2	0.0386877	136	0.150826	0.107588	0	0.0768843	0.0282866	0	0.0888217	0	0.0412884	0.0169896	0.0188508	0	0	0.0529263	0.0497227	0.0350562	0.0322938	0.0739585	0	0.045583	0.032119	0.0730831	0.030803	0.0357132	0.0397228	0	0.0205112	0	0	0.0320775	0	0.0756358	0.0729678	0.119041	0.059038	0.00569928	0.0270673	0.030618	0	0.0434522	0.036926	0.035708	0.0169075	0	0.0385367	0.150826	0.100216
UBR3	0.0148907	286	0.491252	0	0	0	0	0	0	0	0	0	0.0329509	0	0	0.0181125	0.0294054	0	0.0183421	0	0	0.0236634	0	0.0347525	0.0123735	0.0377527	0.0461384	0	0.0177149	0	0	0	0.0276174	0.0169381	0.073296	0	0.00755014	0.00706394	0.00559598	0.00483601	0.0379085	0.0100175	0.0372119	0	0	0.0387015	0.00658297	0	0
UBR4	0.0242001	215	0.300986	0	0	0.0452438	0.0168964	0	0	0.300986	0	0	0.0204559	0	0	0.0559048	0.0666458	0.0214341	0.0366846	0.0559795	0	0.0409445	0	0.0372033	0.00563737	0	0	0	0.0217326	0	0	0.113138	0	0.0305476	0.103516	0.0384305	0	0.0119201	0.00740731	0.00110817	0.0634746	0.0528011	0	0.00420684	0.0114295	0	0.0284999	0.0724198	0
UBR5	0.0289368	184	0.141785	0	0	0.00965758	0.0168777	0	0	0	0.0108339	0.0198226	0.0337294	0.0394965	0	0.0434226	0.0264787	0.0200855	0.0416302	0	0	0.0666044	0	0	0.0186361	0	0.0379663	0	0.0122537	0.0508725	0	0	0.041037	0.0407604	0.035482	0.0371122	0.0637195	0.0430322	0.0235354	0.019877	0.0391203	0.0316367	0.0100908	0.0225981	0.027468	0.0649995	0.0246122	0	0
UHRF2	0.0818325	52	0.65501	0.254035	0.39551	0.269339	0.283193	0.330284	0.335862	0.483195	0.302871	0.139848	0.188543	0.28742	0	0.146295	0.158189	0.162311	0.126769	0.65501	0.15362	0.175773	0.32411	0.191851	0.236153	0.19746	0.329877	0.0529799	0.134177	0.242794	0.288547	0.103895	0.012504	0.085507	0.0933842	0.106723	0.0363426	0.042866	0.0070188	0.00576701	0	0.0182431	0.0216622	0	0	0.103552	0.0266915	0.0172554	0
UNK	0.0552006	86	0.233689	0.233689	0.0619727	0.0510373	0.0474505	0	0.128403	0	0.116212	0.0599477	0.019566	0.0399693	0	0.0493882	0.0381909	0.0205317	0.0523558	0	0	0.0653459	0.0284974	0.0364883	0.0547239	0.156916	0.0866502	0	0.0528736	0.050119	0	0.0120772	0.0927386	0.0114637	0.0371543	0.0249669	0.00877197	0.082171	0.0640921	0.0920801	0.173066	0.0115075	0.062168	0.0660577	0.102359	0.0691734	0.0713316	0.0239556	0.110829
UNKL	0.013928	300	0.119522	0	0.119522	0.0272441	0	0	0	0	0.0596137	0	0	0	0	0.00730478	0.0101441	0.0095223	0.0191074	0.0656338	0	0	0.0301749	0.0303511	0.0133815	0	0	0	0.0097752	0	0	0.0127041	0.0278237	0.00891901	0.0391005	0	0	0.0124109	0.0206764	0.0168066	0	0	0	0.00862917	0.00650905	0	0.0161836	0	0
VHL	0.0463836	107	0.233689	0.233689	0.110523	0.0769163	0.134632	0.0919924	0.0802356	0.165331	0.08214	0.054346	0.0576482	0.0602458	0	0.0755157	0.0551697	0.0970868	0.0550898	0.0811898	0.16008	0.0646344	0.0813627	0	0.0391722	0.0389365	0.0784714	0.0448753	0.0271243	0.0886732	0	0.0153924	0.144245	0.122421	0.0680192	0.0265514	0.0186407	0.0403768	0.0249228	0.0232142	0	0.0673661	0	0.0292405	0.0320416	0.0296051	0.0562362	0.0232052	0
VPS11	0.030916	177	0.170297	0.0791708	0.0313823	0.0675072	0.0383058	0.141355	0	0	0.0778538	0.0805752	0.0547224	0.0635231	0	0.0564859	0.0467125	0.0419446	0.0518152	0	0.0654989	0.0469082	0.0849329	0.0715246	0.0313639	0.0430865	0.170297	0	0.0386711	0.0291513	0	0.044366	0	0.0435108	0.0315864	0.0663028	0.0195877	0.00783841	0.0172451	0.0177785	0.0660693	0.0120838	0.024446	0.0192368	0	0	0.0349104	0.0475715	0
VPS18	0.0133225	306	0.0746598	0	0	0.0330108	0.0399765	0.0499753	0.0639992	0	0.0545737	0.016835	0	0.0164799	0	0.0168338	0.0145132	0.00538569	0.00825304	0	0.0746598	0	0.0305247	0.0303511	0.011426	0	0	0.0448753	0.0469663	0	0	0.0128006	0.0160361	0.0603259	0.0416736	0.0399163	0.0126192	0	0.00280446	0.00281586	0	0.0417614	0	0	0	0	0.0102986	0	0
VPS41	0.0453223	109	0.275624	0	0.0332384	0.0720352	0.111204	0.0946395	0.0565328	0.148906	0.0525223	0.0160715	0.0363192	0.0218013	0	0.0660257	0.0669473	0.0572071	0.0426685	0	0	0.0470213	0.0278464	0	0.0634403	0.0432204	0.0399891	0.104635	0.0277718	0.0332972	0	0.0107004	0.0497674	0.0473188	0.101522	0.0242921	0.0598719	0.0483373	0.0251346	0.0279142	0.275624	0.0413187	0.0367019	0.014532	0.0289991	0.0342486	0.025855	0.0246314	0.0913068
VPS8	0.0331967	160	0.140004	0	0.0320778	0.0341213	0.020508	0.0883784	0	0	0.0326781	0.0342129	0.0199871	0.0372267	0	0.0170355	0.0378675	0.0422398	0.0147736	0.0559795	0	0.069262	0.0272659	0	0.0256467	0.0421271	0.0452686	0	0.0474672	0.100883	0	0.0108845	0.026066	0.0913009	0.0278597	0	0.0307477	0.0212358	0.0261818	0.0202998	0.0392545	0.047954	0.0255813	0.0380566	0.0308305	0.140004	0.0255001	0.0235768	0.115374
WDSUB1	0.0259396	202	0.197525	0.191789	0.197525	0.0549429	0.0668154	0.162989	0.165957	0	0.0761313	0.0673805	0.0163496	0.0209532	0	0.0181828	0.0367619	0.031016	0.0360387	0	0.169196	0.0221973	0	0.0374352	0.0192437	0.0343085	0.0413194	0.0451207	0.0273674	0.0498609	0	0	0.0181059	0.0172402	0.0164961	0.0867662	0.018957	0.0416128	0.0163005	0.0107271	0.0391203	0.023744	0	0.00597092	0.0368222	0	0.0378424	0	0
WHSC1	0.027279	188	0.197747	0	0	0	0	0	0	0	0	0.0137856	0	0.0162465	0.118678	0	0.00725325	0	0.00449239	0	0	0.0194228	0	0	0.00637093	0	0.0464416	0	0.112632	0	0	0	0.0496049	0.160337	0.0940722	0.0720846	0.0660105	0.0528468	0.0144244	0.028806	0.156787	0.0862166	0.0108254	0.00518196	0.0049514	0.0645815	0.0147777	0.0145246	0
WSB1	0.309147	6	1.77771	0.121823	0.31458	0.432386	0.745422	0.599629	0.289441	0.327258	0.214406	0.425136	0.626545	0.122333	0.128284	0.331791	0.35333	0.487535	0.354874	0.257891	0.624936	0.256993	0.170866	0.320301	0.163467	0.148939	0.185691	0	0.2359	0.0843189	0.304486	0.309296	0.211136	0.381815	0.673814	0.371709	0.502477	0.121628	0.0692798	0.108012	0.21865	0.825158	0.154205	0.0929636	0.0740773	0.393352	0.227309	0.542275	0.0991142
WSB2	0.0190642	251	0.0981957	0	0	0.0349919	0.0540531	0	0.0499282	0	0.011335	0	0	0	0	0.00795572	0.0212492	0.0105672	0.0141504	0	0	0.0221715	0.0285577	0.0981957	0.0248893	0	0.0756595	0	0.042201	0.0315173	0	0	0	0.044298	0.070851	0.0352424	0.0471998	0.0126836	0.004444	0.00768475	0	0.0808474	0	0	0.0301835	0.069303	0	0.0625466	0
WWP1	0.0308774	178	0.413463	0	0.0284054	0.0351296	0	0	0	0	0.0255618	0	0	0.0199513	0	0.0507853	0.0244079	0.00556199	0.0339425	0.0787828	0	0.0233502	0.0891293	0.0364883	0.0182007	0.0315016	0.0436575	0.0561561	0.0178322	0	0	0	0.0467541	0.0278892	0.0217272	0	0.0330808	0.0140158	0.00482977	0.0119105	0	0.0115036	0.030775	0.00915092	0.00474664	0	0.0172002	0.0408398	0
WWP2	0.0318996	168	0.18509	0	0.0916063	0.0870473	0.0215777	0.142218	0.0639992	0.18509	0.0625436	0.0476091	0.0748929	0.0214694	0	0.0187708	0.0444788	0.0143855	0.00818574	0.0739585	0.0796817	0	0.122184	0.0340847	0.0458982	0.0397137	0	0.0523646	0.0611683	0.0700603	0	0.0262871	0.0196672	0.0287838	0.0391269	0.0424385	0.0674588	0.020366	0.0113668	0.00753127	0.0459737	0.0348837	0.0112079	0.0162572	0.0227204	0	0.0494096	0.0447191	0
XIAP	0.0662578	68	0.491252	0	0.204245	0.171682	0.19626	0	0.0870492	0.128164	0.226592	0.0317722	0.0348675	0.0394277	0	0.0977987	0.0666587	0.0607741	0.0517108	0.0744836	0	0.0239081	0.032119	0.0381344	0.11344	0.0343085	0.040093	0.147421	0.060217	0.0623296	0	0.0274284	0.13493	0.0533011	0.135054	0.0979903	0.110917	0.0573259	0.0199127	0.0327785	0	0.0417803	0.0659423	0.0282836	0.0241603	0	0.0390321	0.120273	0
ZBTB1	0.0351686	154	0.189667	0.173087	0.0614957	0.0211076	0	0	0	0	0.0575675	0.0165789	0	0.0376456	0	0.00870408	0.0449318	0.029041	0.0327582	0	0	0.0623422	0.0553792	0	0.0367257	0.0793044	0.118285	0	0	0	0	0.016237	0.0230808	0.0198326	0.0385043	0.0345148	0.0546749	0.0287957	0.0240645	0.0257601	0.0459737	0.0185877	0	0.0091202	0.0388522	0	0.020295	0	0
ZBTB10	0.0105023	341	0.129266	0	0	0	0	0	0	0	0	0	0.016321	0.01739	0	0	0	0.020426	0	0	0	0	0	0	0	0	0.0349371	0.0431296	0	0	0	0.0121771	0.0279119	0.00370678	0.00369431	0.0368146	0.0220876	0.0117646	0	0.00430202	0.0711013	0	0	0.00452377	0	0	0	0	0
ZBTB11	0.0302521	180	0.3188	0	0	0.0480796	0.088909	0.0607442	0	0.165331	0.0219662	0	0.0706875	0	0	0.00910501	0.0237045	0.0114864	0.0140301	0	0	0.0412752	0.0281588	0.0358403	0.00650973	0	0	0	0.089814	0.0751671	0	0	0.0433938	0.0761261	0.102699	0.107773	0.051475	0.0503979	0.0053384	0.0162196	0.188289	0.0338072	0.00911417	0.0206927	0.00616948	0	0.0303414	0.0240741	0.3188
ZBTB14	0.0132868	307	0.110878	0	0.0283499	0.0161297	0.0826987	0	0	0	0.020827	0.0165789	0.0591131	0.0162465	0	0.0182758	0.0119775	0.0104201	0.0142154	0	0	0.0461923	0	0	0.0303606	0	0.0894893	0.0490449	0.0103081	0	0	0	0	0.0200395	0.0252235	0.0359107	0.00832663	0.0370023	0.00858387	0.00637755	0	0.0127986	0.0376838	0.0135174	0	0	0.0352992	0.0231521	0
ZBTB16	0.00759367	369	0.127014	0	0.0332384	0.025849	0	0	0	0.127014	0.0879365	0	0	0	0	0	0.00801958	0.0100732	0.0141586	0	0	0	0	0	0.0569264	0.0795632	0	0	0	0	0	0	0.0183127	0.00410853	0	0	0	0.0196044	0	0	0	0	0	0	0	0	0.00700191	0	0
ZBTB17	0.0145258	290	0.107775	0	0.0996908	0.0520837	0.0625883	0.107775	0.0831285	0	0.041794	0.0295051	0	0.0405166	0	0.0153338	0.0157546	0.0212246	0.0394806	0	0	0	0.0291995	0.0355305	0.0114578	0.0427581	0	0.0523646	0.01794	0	0	0	0.026066	0.00325923	0.00664073	0.0353972	0	0.0180623	0.00845372	0.00573013	0.0600751	0.0173693	0	0.00830549	0	0	0.0112049	0	0
ZBTB18	0.00885555	356	0.0669458	0	0	0	0	0	0	0	0	0.0176461	0.0372597	0.020855	0	0.0165744	0.0137917	0.0151679	0.0135783	0	0.0541916	0.0231837	0	0.0669458	0.00625794	0	0	0	0	0	0	0	0	0.0169891	0.0518402	0	0.0384804	0	0	0.00252189	0	0.0340753	0	0	0	0	0.00718335	0.0244161	0
ZBTB2	0.0186956	257	0.34212	0.34212	0.0306279	0.0264343	0.0521456	0.0996658	0	0	0.0482154	0.0268482	0	0.041619	0.14124	0.00863456	0.0128294	0.0132417	0.031992	0	0.0752703	0	0.0281732	0	0.0247782	0	0.0733494	0	0	0	0	0	0	0.0163602	0.0103848	0	0	0	0.0111691	0.0133554	0	0.0238808	0	0.0223148	0.0142197	0	0.00623582	0.0206991	0.0913068
ZBTB20	0.0250616	209	0.335155	0	0.0530363	0.0168811	0.0426578	0	0	0	0.00881005	0.0346057	0	0.0402286	0	0.0160101	0.014977	0	0.00523034	0	0	0	0.0589284	0.0310368	0.0310889	0	0.0408456	0	0	0.017195	0.335155	0.0170376	0.0281929	0.0554343	0.0573277	0.0392702	0.0377432	0.00658334	0.0164586	0.0142886	0	0.0212107	0.0128333	0.0139282	0.0191327	0.069303	0.00696513	0.0234546	0
ZBTB21	0.0186551	258	0.0948642	0	0.0319346	0.0159823	0.0156943	0.0447314	0	0	0.0236429	0.0152205	0	0	0	0.00635979	0.0131516	0.0106415	0.028655	0.0752486	0	0.021639	0	0	0.00625389	0	0	0	0.0215415	0	0	0	0	0.0122597	0.00715448	0	0.0312909	0.011782	0.00559102	0.0131685	0	0	0	0.00471222	0.0116544	0	0	0	0
ZBTB22	0.0079731	364	0.0553583	0	0	0.0226873	0	0	0	0	0.0119289	0.013866	0	0	0	0.0278251	0.0194462	0.0230616	0.0133931	0	0	0.0239916	0	0.0366324	0	0	0.040496	0	0	0	0	0	0	0.0143943	0.00572769	0	0.0225421	0.00669514	0	0.00285015	0.0379085	0.00941978	0	0.00334115	0	0	0	0	0
ZBTB24	0.0106943	339	0.116775	0	0.059471	0.021388	0	0	0.0582649	0	0.0285064	0	0.0167507	0	0	0.016191	0.0062112	0.00514689	0.0139952	0	0	0	0	0	0.00650973	0	0	0	0.0106823	0	0	0	0.0199862	0.015602	0.0224721	0.0153122	0.0130585	0.0236031	0.0121995	0.00784016	0.116775	0.00934712	0.00981548	0.00879201	0.00726986	0.0668166	0.00566765	0	0
ZBTB25	0.0173649	268	0.280675	0.280675	0	0.0319966	0.0189609	0	0.0823287	0	0.0709318	0.0666779	0	0.0417345	0	0.0245269	0.0144095	0.00905833	0.0085663	0	0	0	0	0	0.0192205	0.0795361	0	0.0404126	0.00783887	0	0	0	0.0201092	0.0128765	0	0.0384982	0.0131326	0.0343688	0.0249759	0.0148294	0.099496	0	0.0180474	0.014313	0.0375925	0	0.00561897	0	0
ZBTB26	0.00449917	399	0.065066	0	0	0	0	0	0	0	0	0	0	0	0	0	0.00458753	0.00527492	0.0127536	0	0	0	0	0	0.00584847	0	0	0	0.0505951	0	0	0	0	0.0131249	0.0137985	0	0	0	0	0.00257281	0.0540027	0	0	0	0.00457411	0	0	0	0
ZBTB3	0.00292309	422	0.0342486	0	0	0	0	0	0	0	0	0	0	0.0181706	0	0	0.00991868	0.0162163	0.00428734	0	0	0	0	0	0.0120578	0	0	0	0	0	0	0	0	0.00446579	0	0	0	0.00662085	0	0	0	0	0	0	0	0.0342486	0	0	0
ZBTB33	0.0203051	236	0.120792	0.120792	0.0283499	0.031585	0	0	0.0672591	0	0.0401166	0.0526892	0.0182151	0.0186135	0	0.0251179	0.0183726	0.0333644	0.0285219	0.0650702	0.116898	0.0410311	0.030908	0.0699152	0.00671073	0	0.0389942	0	0.0417279	0.0344464	0	0	0.0511629	0.0577856	0.0399062	0.0942241	0.0927472	0.0432378	0.00741478	0.00176667	0.118679	0	0	0	0.00646166	0	0.0191543	0.0226898	0
ZBTB37	0.0090128	354	0.128164	0	0	0.0198208	0	0	0	0.128164	0.0348548	0	0	0.0169061	0	0	0.00865758	0.0049084	0.00485242	0	0	0.0239916	0	0	0.00622177	0.0412672	0	0	0.0109369	0	0	0	0	0.0266573	0.0421878	0	0.0104023	0	0	0.00116189	0	0.00900601	0	0.00551302	0	0.0451199	0.022182	0	0
ZBTB38	0.06612	70	0.267755	0.107588	0.0320778	0.0296467	0.0195374	0	0	0	0.0643725	0	0	0.0562982	0	0.0142344	0.0267935	0.00903033	0.0192223	0.130704	0	0.0347338	0	0	0.0324812	0.0764246	0.0461384	0.0404126	0	0	0.267755	0.0123838	0.255943	0.0233093	0.0251674	0.0611067	0	0.0361699	0.0933177	0.123758	0.0541005	0.0409354	0.0472554	0.113511	0.153395	0.0390179	0.0330832	0	0.170594
ZBTB39	0.00249974	434	0.0357883	0	0	0	0	0	0	0	0	0	0	0	0	0	0.00358137	0	0	0	0	0	0	0	0.0067954	0	0.0348549	0	0	0.0357883	0	0	0	0	0.00259267	0	0.0113432	0	0.00473522	0.00254125	0	0	0	0	0.0059346	0	0.00524842	0	0
ZBTB4	0.0179625	263	0.255607	0	0.0302129	0.0170629	0.0168777	0	0	0	0.0950548	0.0195667	0.0195406	0.03839	0.255607	0.0289998	0.0183603	0.0148214	0.0194048	0.0656338	0	0.0168558	0.0541095	0	0.0524503	0.0792036	0.0444236	0.0556243	0	0	0	0	0.0263998	0.0185205	0.0209057	0.0204013	0.0129065	0.0169479	0.00443186	0.00361404	0	0.0115467	0.01769	0.00957246	0	0	0	0	0
ZBTB40	0.0109039	336	0.0726084	0	0	0	0	0	0	0	0	0	0	0.0625643	0	0.0093367	0.0146832	0	0	0	0	0	0.0317046	0	0	0.040763	0	0	0.00938789	0	0	0	0.0230808	0.00633743	0.00826881	0	0.0247342	0.0048353	0.0152866	0.013227	0.0726084	0.0214343	0.0210369	0.0143389	0.0185568	0	0.00623582	0	0
ZBTB41	0.00711998	374	0.0794219	0	0	0	0	0	0	0	0	0.0162429	0	0	0	0.00960401	0.00954114	0.00468881	0.00503092	0	0.0794219	0	0	0	0.00473505	0	0.042373	0	0	0	0	0.0115288	0	0.00313592	0.00485279	0.0317111	0.0113588	0.00694794	0.0101415	0.00472455	0	0.0113694	0	0	0.00856479	0	0.0132963	0	0
ZBTB43	0.0165025	274	0.112618	0.112618	0	0.0284389	0.0424627	0	0.0499282	0	0.0224719	0	0.0202239	0	0	0.00805205	0.0168739	0.0273429	0.0125551	0	0.0746598	0.0178275	0	0.0381622	0.0121146	0.0406267	0	0.0574875	0.00664389	0	0	0.0599066	0.0235715	0.0335617	0.017647	0	0.031195	0.0212351	0.00821862	0.00589786	0	0	0	0	0.00565023	0.0342486	0.00652225	0.0220593	0
ZBTB44	0.0410466	127	0.248281	0	0.0341922	0.042197	0.0200917	0.0495294	0	0	0.102941	0.0331135	0.0561222	0.0608914	0.122086	0.0252649	0.0526659	0.0315299	0.0182091	0	0	0.0666116	0.0220236	0.0675862	0.0260245	0.0736982	0.248281	0	0.0771755	0.029576	0	0.015885	0.0272385	0.172265	0.173306	0.14483	0.0965633	0.13078	0.0173794	0.00720043	0.147358	0.0574175	0.014041	0.0195385	0.0263669	0.150045	0.0139421	0.0509821	0
ZBTB45	0.0101248	344	0.107588	0.107588	0	0.0392403	0	0.0994641	0	0	0.0311492	0.0172941	0	0.0207038	0	0	0.0151839	0.0138628	0.0380325	0	0	0	0	0	0	0.0423442	0.0434389	0	0	0	0	0.0121771	0	0.00518217	0.00701698	0	0	0.0210379	0.00829903	0.0121896	0	0	0.0105764	0.00840537	0.0159749	0	0	0	0
ZBTB48	0.0190144	253	0.273133	0.195732	0.0280107	0.0340341	0.06376	0	0	0	0.012467	0.0172941	0.016995	0	0	0.0344838	0.027883	0.0314613	0.0233303	0	0.0738576	0.0442478	0.0604139	0.0380514	0.031463	0.0343085	0.0469275	0	0.0291563	0	0.273133	0.027716	0.0268642	0.014404	0.0303128	0.0259538	0	0.0292539	0.00287223	0.00985267	0	0	0.0443235	0.0102165	0.00442477	0.0296051	0.0562675	0	0
ZBTB49	0.0106588	340	0.104574	0	0	0.0246022	0	0	0.0823287	0	0	0.0322295	0.0537809	0	0	0.0160221	0.00636628	0.00539501	0.0138831	0	0	0.0238256	0.0248106	0	0.0312958	0.0357132	0.0384513	0	0	0	0	0	0	0.00374795	0.00366829	0	0	0	0.0109305	0.00620257	0.0459737	0.00860175	0	0	0.0117613	0	0.0115738	0.0230783	0.103739
ZBTB5	0.00614593	382	0.107629	0	0	0	0	0	0	0	0	0	0	0	0	0	0	0	0	0	0	0	0	0	0.00534523	0	0.037861	0	0.0116052	0.0362855	0	0	0.0241353	0.0255892	0.00823763	0	0	0.0135238	0.00471291	0.00339923	0.0379085	0	0.0186513	0	0	0.107629	0.0180776	0	0
ZBTB6	0.0095664	348	0.0603694	0	0	0	0	0	0	0	0	0.0345373	0	0	0	0	0.0131645	0.00578652	0.0092487	0	0	0.0440465	0.0603694	0.0384729	0	0	0	0	0	0	0	0	0	0.0446896	0.0138636	0	0.00835965	0.0146221	0.0027891	0.00794943	0	0.0336156	0.0169352	0.00441381	0	0	0	0	0
ZBTB7A	0.0311179	173	0.156167	0	0.059684	0.0584306	0.0168964	0	0	0.156167	0.0556296	0	0.0942263	0	0	0.0837104	0.0513824	0.0158029	0.0312051	0	0	0	0.0282605	0.0383305	0.0507636	0	0.0414117	0.0939201	0.0627417	0	0	0.0290859	0.0321788	0.0728814	0.0958456	0.0322858	0.0604501	0.0142979	0	0.00719726	0.0788599	0.0661183	0.0263493	0.0108382	0	0	0.0455861	0	0
ZBTB7B	0.0375254	144	0.500126	0	0.0512072	0.190632	0.185337	0.115601	0	0.500126	0.0228894	0.0334156	0.0948889	0.0416826	0	0.0574646	0.0729298	0.0753279	0.0797853	0	0.0642576	0.021291	0.0622746	0.0310795	0.0260013	0.118014	0	0	0.0500877	0.0554215	0	0.0686769	0	0.0438345	0.0515536	0.0153122	0.0125974	0	0.0119336	0.0161106	0	0.113612	0.00939031	0.0139333	0.0133094	0.0399661	0.0206634	0.0585519	0
ZBTB8A	0.00195423	442	0.029219	0	0	0	0	0	0	0	0	0	0	0	0	0	0	0	0.00449953	0	0	0	0	0	0	0	0	0	0	0	0	0	0	0	0.00641681	0	0	0.029219	0	0	0	0	0	0	0	0	0.0109586	0	0
ZFAND3	0.0482392	99	0.31449	0.241863	0.091743	0.164897	0.152212	0.189506	0.180355	0.31449	0.141504	0.036653	0	0	0	0.0771177	0.0915117	0.0278432	0.0733358	0	0.0619	0.0211901	0.0565152	0	0.0307674	0.0759571	0.0667171	0	0.0668536	0.0227033	0.267755	0.0411495	0	0.0762674	0.0817853	0	0.0282569	0.0162583	0.00233605	0.0117433	0.0541005	0.0436446	0.0557581	0.0213707	0.013774	0.0451199	0.00829857	0	0
ZFAND5	0.157631	20	0.751163	0	0.155262	0.431661	0.751163	0.285743	0.296676	0.548316	0.0989415	0.189943	0.337818	0.161412	0	0.198032	0.256487	0.207921	0.181903	0.121613	0.0549979	0.296623	0.141142	0.179719	0.129147	0.232527	0.167174	0.0591314	0.293186	0.0415015	0.267755	0.200112	0.0349804	0.126457	0.127746	0.139277	0.151211	0.0532476	0.022093	0.0383808	0.122511	0.108197	0.038419	0.0346651	0.0426904	0.0451199	0.0330814	0.0828574	0
ZFAND6	0.230101	9	0.751345	0.507668	0.327062	0.210951	0.603871	0.0897408	0.4731	0.198916	0.229821	0.132633	0.229683	0.209959	0.259023	0.122454	0.219303	0.207067	0.1913	0.620971	0.480196	0.23249	0.203557	0.218767	0.193691	0.147383	0.543044	0.114745	0.125071	0.115774	0	0.150619	0.11269	0.103459	0.141906	0.119467	0.214131	0.213505	0.237026	0.261863	0.256287	0.226115	0.248421	0.257689	0.279752	0.540562	0.420832	0.338833	0.0447331
ZFPL1	0.0442155	113	0.195732	0.195732	0.116816	0.0687866	0.0494139	0.12401	0.0888217	0	0.063209	0.0318599	0.149594	0.0200359	0	0.0331265	0.0289568	0.045549	0.047075	0	0.137546	0.0376176	0	0.0358854	0.0560312	0.0794421	0.0773683	0	0.0307667	0.0788547	0	0.0276577	0	0.0289017	0.0271037	0.0350226	0.013116	0.0498384	0.0389777	0.0507445	0.0392545	0.0364957	0	0.0546242	0.045914	0	0.0380275	0.104011	0
ZNF131	0.0406695	130	0.181235	0.146181	0.0613445	0.0502168	0.025102	0.103327	0.181235	0	0.0541776	0	0.0194529	0.0814229	0	0.0348303	0.0289803	0.0687583	0.0408812	0	0	0.0167995	0.0860021	0	0.058074	0.0369129	0.0887472	0	0.0405277	0.0556148	0	0.0272572	0.036691	0.0734187	0.0679257	0.0900034	0.0122183	0.0591237	0.0282278	0.0317759	0.03815	0.0223947	0.0190509	0.0236609	0.0281871	0.133299	0.064819	0.0234988	0.0447331
ZNF598	0.0121872	322	0.0467598	0	0	0.025212	0.0440997	0	0	0	0	0	0.0204559	0	0	0.0220161	0.0121989	0.00406326	0.00475787	0	0	0.023744	0	0	0.0129823	0.0430865	0	0.0466439	0.00579477	0	0	0	0	0.0267526	0.0443239	0	0.0122249	0.0150585	0.00429925	0.00789511	0.0467598	0	0.0133673	0.0186334	0.00750551	0	0.0150464	0	0
ZNRF1	0.0059114	384	0.0430579	0	0	0	0	0	0	0	0	0	0	0	0	0.0178072	0.00272308	0	0.00935144	0	0	0.0221973	0.0272789	0.0318638	0.0129131	0	0	0	0.00865242	0	0	0	0	0.012323	0.0140305	0	0	0.0430579	0.00462713	0.00173145	0	0	0.0170426	0	0.015052	0	0.00965406	0	0
ZNRF2	0.0115244	329	0.156167	0	0	0.0127009	0	0	0.100674	0.156167	0.0233975	0	0.0473618	0	0	0.00877547	0.00632524	0.00951853	0.0145449	0	0	0	0	0	0.0113594	0	0.0414117	0	0.0107899	0	0	0	0	0.0303712	0.0202412	0.0542252	0	0.00614088	0.0102222	0.00908101	0.0993989	0.025281	0	0.00603532	0.00486204	0	0	0	0
ABTB2	0.000476735	475	0.00848217	0	0	0	0	0	0	0	0	0	0	0	0	0.00848217	0	0	0	0	0	0	0	0	0	0	0	0	0	0	0	0	0	0	0	0	0	0	0	0	0	0	0	0	0	0	0.00583352	0	0
ASB2	0.00466985	397	0.373196	0	0	0	0	0	0	0	0	0	0	0	0	0	0	0.00511771	0.0096624	0	0.373196	0	0	0	0.0188464	0	0	0	0	0	0	0	0	0	0	0	0.00775137	0	0	0.00655177	0	0	0.0351866	0	0.00492281	0	0.0223018	0	0
ASB4	0	536.5	0	0	0	0	0	0	0	0	0	0	0	0	0	0	0	0	0	0	0	0	0	0	0	0	0	0	0	0	0	0	0	0	0	0	0	0	0	0	0	0	0	0	0	0	0	0	0
ASB9	0.0062472	381	0.106008	0	0	0	0	0	0	0	0	0	0	0	0	0	0.00322825	0	0.00506941	0	0	0	0	0	0	0	0	0	0	0	0	0	0	0.00404509	0.010687	0	0	0.0344438	0	0	0.0379085	0	0	0	0	0.0595869	0	0	0
BACH2	0.0040752	404	0.097453	0	0.0493515	0	0	0	0	0	0	0	0	0.0339561	0	0	0.00172162	0.0103075	0	0	0	0	0	0	0.00659048	0	0	0	0	0.097453	0	0	0	0.0044957	0	0	0.0113432	0.00614088	0	0	0	0	0.0185905	0	0	0.0437915	0.0211084	0	0
BCL6B	0.00236047	437	0.0661411	0	0	0	0	0	0	0	0	0	0	0	0	0	0	0	0	0	0	0	0	0	0	0	0	0	0	0	0	0	0	0	0	0	0	0	0	0	0	0	0	0	0	0	0	0	0
BRCA1	0.0185572	260	0.181101	0	0	0	0	0	0	0	0	0	0	0	0	0	0.00179514	0	0	0	0	0	0.0322312	0.0340847	0	0	0	0	0.110229	0.0316138	0	0.0436655	0.0422559	0.151484	0.0402521	0	0.0432306	0.072646	0.0121534	0.0210495	0	0.0299347	0.0167577	0.0240922	0.011212	0.0399661	0	0	0
BTBD11	0.00240616	436	0.0362227	0	0	0	0	0	0	0	0	0	0	0	0	0	0.00706708	0	0.00515329	0	0	0	0	0	0	0.0362227	0	0	0.0102538	0	0	0	0	0.00909725	0.00705961	0	0.0361405	0.0227213	0	0	0	0	0	0	0	0	0	0	0
BTBD8	0.000478816	474	0.0296827	0	0	0	0	0	0	0	0	0	0	0	0	0	0	0	0	0	0	0	0.0296827	0	0	0	0	0	0	0	0	0	0	0	0	0	0	0	0	0.000915257	0	0	0	0	0	0	0.00862013	0	0
CCNF	0.0064578	378	0.107875	0	0	0	0	0	0	0	0	0	0	0	0	0	0.00317826	0	0	0	0	0.021639	0	0	0	0	0	0	0.00686234	0.0443034	0	0.0117246	0	0.0351375	0.0120423	0.0373765	0	0.0135487	0.00760722	0.00565808	0	0.0247416	0.0204956	0.0129476	0.0112069	0.107875	0	0.0145246	0
DTX4	0.00263179	430	0.113522	0	0	0	0	0	0	0	0	0	0	0	0	0.00940111	0.00143577	0	0	0	0	0.0239081	0	0	0	0	0	0	0	0	0	0	0	0	0.0427398	0.113522	0.023175	0	0	0.00116537	0	0	0	0.00333855	0	0	0	0	0
ENC1	0.0124282	319	0.0559795	0	0	0	0	0	0	0	0	0	0.0182252	0	0	0.0164998	0.00816474	0.00522081	0.0212943	0.0559795	0	0.0238256	0	0	0.00614764	0	0	0	0	0	0	0.0107004	0	0.0326078	0.019342	0	0.0180663	0	0.00471589	0.00416197	0	0.0324112	0	0.00509176	0.00719768	0	0	0.0127491	0
FBXL13	0.00100226	456	0.0672481	0	0	0	0	0	0	0	0	0	0	0	0	0	0	0	0	0	0	0	0	0	0	0	0	0	0	0	0	0	0	0	0	0	0	0	0	0.00122172	0	0.010903	0	0	0	0	0	0.0672481	0
FBXL18	0.00289574	423	0.0247026	0	0	0	0	0	0	0	0	0	0	0	0	0	0.00786607	0.0103195	0	0	0	0.022515	0	0	0	0	0	0	0.0102538	0	0	0	0	0	0.00664455	0	0.0116523	0	0.00504547	0	0	0.0247026	0	0.00982087	0	0	0.00616729	0	0
FBXL2	0	536.5	0	0	0	0	0	0	0	0	0	0	0	0	0	0	0	0	0	0	0	0	0	0	0	0	0	0	0	0	0	0	0	0	0	0	0	0	0	0	0	0	0	0	0	0	0	0	0
FBXL8	0.00315142	419	0.035082	0	0	0	0	0	0	0	0	0	0	0	0	0	0.0081155	0	0.00460347	0	0	0.0220692	0	0.035082	0	0	0	0	0	0	0	0	0	0	0.00683279	0	0.00632317	0	0.00223242	0.0066458	0	0	0.0121636	0	0.0101095	0	0	0	0
FBXO10	0.0100634	345	0.0559795	0	0	0	0	0	0	0	0	0	0	0	0	0	0.00167949	0	0	0.0559795	0	0	0.0289278	0	0	0	0	0	0	0	0	0	0	0	0	0	0	0	0.0126005	0.0230814	0	0	0.0290574	0.018578	0.0200938	0	0.00593121	0	0
FBXO15	0.000779401	466	0.0185905	0	0	0	0	0	0	0	0	0	0	0	0	0	0	0	0	0	0	0	0	0	0	0	0	0	0	0	0	0	0	0	0	0	0	0	0	0.00146022	0	0	0.0185905	0	0	0	0	0	0
FBXO16	0.0186399	259	0.0499496	0	0	0	0	0	0	0	0	0	0	0	0	0	0	0	0	0	0	0	0	0	0	0	0	0	0	0	0	0	0.0436073	0.00307891	0.00610999	0.0303124	0	0	0.0394732	0.0493855	0	0	0.0225099	0.0499496	0.0323644	0	0.00593121	0	0
FBXO2	0.000623483	470	0.0187666	0	0	0	0	0	0	0	0	0	0	0	0	0	0	0	0	0	0	0	0	0	0	0	0	0	0	0	0	0	0	0	0	0	0	0	0	0	0	0	0	0.00439682	0.00678994	0	0	0	0
FBXO27	0.000418767	478	0.0109364	0	0	0	0	0	0	0	0	0	0	0	0	0	0	0	0	0	0	0	0	0	0	0	0	0	0	0	0	0	0	0	0	0	0	0	0	0.00131965	0	0	0	0	0	0	0.0109364	0	0
FBXO5	0.0510063	93	0.491252	0.341368	0.0250256	0	0.0315623	0.0329275	0	0.292345	0.033308	0.0222416	0.0190445	0	0	0	0.00663456	0.00514421	0.00370406	0	0	0	0	0.0372033	0.00656637	0.0348563	0	0.0455239	0.0717696	0.0887666	0	0.0152178	0.0848488	0.102653	0.0623899	0	0.048491	0.0894389	0.0530002	0.0858181	0.15151	0.144624	0.10597	0.0918855	0.0774974	0.256505	0.0727109	0	0.0447331
HECW2	0.00734335	370	0.124736	0	0	0	0	0	0	0	0	0	0	0	0	0	0.00826924	0	0.00464515	0	0	0	0	0	0	0	0	0	0	0	0	0	0	0	0	0	0.0240264	0	0	0	0	0	0	0	0	0	0	0	0
HERC6	0.0107936	338	0.0975846	0	0.030112	0.0376832	0.0402725	0.0975846	0.076245	0	0.0331228	0.0186815	0	0	0	0.0551662	0.0160112	0.0199901	0.00959406	0	0	0	0.0305247	0.0340847	0.0317009	0	0	0	0	0	0	0	0	0.0151404	0	0	0.0304141	0.0162571	0.0032373	0.00242717	0	0	0	0	0	0	0.00554293	0	0
HIC2	0.00374956	408	0.0241353	0	0	0	0	0	0	0	0	0	0	0.0221007	0	0	0.00351642	0.00468881	0	0	0	0.0232589	0	0	0.00779283	0	0	0	0.0197179	0	0	0	0.0241353	0.0121792	0.0067385	0	0	0	0	0.00252589	0	0	0	0	0	0	0	0	0
IPP	0.0130606	310	0.156588	0	0	0.0173061	0	0	0	0.127014	0.00926491	0	0	0.0187198	0	0	0	0	0.00519904	0	0	0	0	0	0	0	0	0	0	0	0	0	0	0.0071026	0.0308392	0.0392702	0.0251857	0.0110401	0.0247868	0.0299188	0.156588	0.0123137	0.0200417	0.0561362	0.0262323	0	0.00751101	0	0
KBTBD11	0.0205778	233	0.174268	0	0	0.036603	0	0	0	0	0.0102936	0	0	0	0	0.0184635	0.0296422	0	0.0091551	0	0	0.0223279	0	0.0364883	0.00666473	0	0	0	0.147106	0.0627689	0	0.0541557	0.0450232	0.174268	0.0621156	0	0.00856048	0.0357792	0.00282656	0	0	0.011185	0	0	0	0	0	0.0225712	0
KCNA3	0.00644131	379	0.107588	0.107588	0	0.00485203	0	0.056964	0	0	0	0	0	0	0	0	0	0	0.00431845	0	0	0	0	0	0.0127462	0.0436312	0	0	0	0	0	0	0.0243365	0	0	0	0	0.00765223	0.0127089	0.0176606	0	0	0	0.00498744	0.0116022	0.0781542	0	0	0
KCNA4	0	536.5	0	0	0	0	0	0	0	0	0	0	0	0	0	0	0	0	0	0	0	0	0	0	0	0	0	0	0	0	0	0	0	0	0	0	0	0	0	0	0	0	0	0	0	0	0	0	0
KCNA5	0.000399729	479	0.0998233	0	0	0	0	0	0	0	0	0	0	0	0	0	0	0	0	0	0	0	0	0	0	0	0	0	0	0	0	0	0	0	0	0.0998233	0	0	0	0	0	0	0	0	0	0	0	0	0
KCNC3	0.00156023	445	0.130117	0	0	0	0	0	0	0	0	0.014186	0	0	0.130117	0.00857638	0.00577635	0.00463546	0.00932197	0	0	0.0240932	0	0	0	0	0	0	0	0	0	0	0	0	0	0	0	0	0	0	0	0	0	0	0	0	0	0	0
KCNRG	0.00201052	441	0.0588393	0	0	0	0	0	0	0	0	0	0	0	0	0	0	0	0	0	0	0	0	0	0	0	0	0	0	0	0	0	0	0	0.00464947	0.0252427	0	0	0.00581644	0.00219852	0.0588393	0	0.0178656	0.00492594	0	0	0.0106888	0	0
KCNS3	0	536.5	0	0	0	0	0	0	0	0	0	0	0	0	0	0	0	0	0	0	0	0	0	0	0	0	0	0	0	0	0	0	0	0	0	0	0	0	0	0	0	0	0	0	0	0	0	0	0
KCTD1	0.00190151	444	0.069303	0	0	0	0	0	0	0	0	0	0	0	0	0	0	0	0	0	0	0	0	0	0	0	0	0	0	0	0	0	0	0	0	0	0	0	0	0.00696586	0	0	0	0	0	0.069303	0	0	0
KCTD14	0	536.5	0	0	0	0	0	0	0	0	0	0	0	0	0	0	0	0	0	0	0	0	0	0	0	0	0	0	0	0	0	0	0	0	0	0	0	0	0	0	0	0	0	0	0	0	0	0	0
KCTD15	0.0052416	393	0.0599027	0	0	0	0	0	0	0	0	0	0	0	0	0.0350099	0.00631108	0.0249881	0	0	0	0.0197545	0	0	0	0.0359651	0.034814	0	0.0171519	0	0	0	0	0.00488424	0	0	0	0.026454	0	0	0	0	0	0	0	0	0	0	0
KCTD17	0.0035894	413	0.143293	0	0	0	0	0	0	0	0	0.0163577	0.0182453	0	0	0.00745873	0.00296764	0.00572846	0.00446885	0	0.143293	0.0185417	0	0.0700126	0.00618238	0	0	0	0	0	0	0	0	0	0	0	0.0113588	0.0054722	0	0.00101472	0	0	0	0.00607505	0.0102905	0.0576888	0	0	0
KLHL11	0.0003901	481	0.00350197	0	0	0	0	0	0	0	0	0	0	0	0	0	0	0	0	0	0	0	0	0	0	0	0	0	0	0	0	0	0	0	0	0	0	0	0	0	0	0	0	0	0	0	0	0	0
KLHL13	0.00015282	494	0.00809527	0	0	0	0	0	0	0	0	0	0	0	0	0	0	0	0	0	0	0	0	0	0	0	0	0	0	0	0	0	0	0	0	0	0	0.00809527	0	0	0	0	0	0	0	0	0	0	0
KLHL23	0.00283487	424	0.126431	0	0	0	0	0	0	0	0	0	0	0	0	0	0	0	0	0	0	0	0	0	0	0	0	0	0	0	0	0	0	0.00879385	0.0127798	0.0536044	0.0138915	0.0542106	0	0	0.0950884	0	0	0	0	0.0496331	0.00532	0	0
KLHL25	0.00137501	449	0.0229055	0	0	0	0	0	0	0	0	0	0	0	0	0	0	0	0	0	0	0.0229055	0	0	0.00645929	0	0	0	0	0	0	0	0	0	0	0	0	0	0	0	0	0	0.0103225	0.00448082	0.00486204	0	0	0	0
KLHL3	0.000900994	463	0.050273	0	0	0	0	0	0	0	0	0	0	0	0	0	0.00309984	0	0	0	0	0	0	0	0	0	0	0	0	0	0	0	0	0	0.00446372	0	0	0	0	0	0	0	0	0.0041345	0	0	0	0	0
KLHL4	0.000599023	471	0.0118862	0	0	0	0	0	0	0	0	0	0	0	0	0	0	0	0	0	0	0	0	0	0	0	0	0	0	0	0	0	0	0	0	0	0	0	0	0	0	0	0	0	0	0	0	0	0
KRT8	0.00380806	406	0.0822854	0	0	0	0	0	0	0	0	0	0	0	0	0	0	0	0	0	0	0	0	0	0	0	0	0	0	0	0	0	0	0	0	0	0.0100355	0.0322715	0.00633675	0.0120345	0	0	0.0101076	0	0.00625753	0	0	0.0231521	0
LNX1	0.000473594	476	0.0104967	0	0	0	0	0	0	0	0	0	0	0	0	0	0	0	0	0	0	0	0	0	0	0	0	0	0	0	0	0	0	0	0	0	0	0.00818557	0	0	0	0	0	0	0.00492379	0	0	0	0
LONRF2	0	536.5	0	0	0	0	0	0	0	0	0	0	0	0	0	0	0	0	0	0	0	0	0	0	0	0	0	0	0	0	0	0	0	0	0	0	0	0	0	0	0	0	0	0	0	0	0	0	0
LRRC29	0.00363506	411	0.0364278	0	0	0	0	0	0	0	0	0	0	0	0	0.00784466	0.00523686	0.014356	0	0	0	0	0.0334601	0	0	0	0.0364278	0	0	0	0	0	0	0	0	0.0322858	0	0	0	0.00363957	0	0	0.00826218	0	0.00735255	0	0.00561897	0.0179905	0
MID1	0.000747492	467	0.0447331	0	0	0	0	0	0	0	0	0	0	0	0	0	0	0	0	0	0	0	0	0	0	0	0	0	0	0	0	0	0	0	0	0	0	0	0	0	0	0	0	0	0.00650109	0	0	0	0.0447331
MID2	0	536.5	0	0	0	0	0	0	0	0	0	0	0	0	0	0	0	0	0	0	0	0	0	0	0	0	0	0	0	0	0	0	0	0	0	0	0	0	0	0	0	0	0	0	0	0	0	0	0
NEDD4	0.0148658	287	0.133984	0	0	0	0	0	0	0	0	0	0.0181553	0	0	0	0.00719986	0.00444552	0	0	0	0	0	0	0.018868	0	0	0	0.0112913	0	0	0.0174366	0.0196672	0.0593814	0.109411	0.0632174	0.00978332	0.0354847	0	0	0.0392545	0.0811052	0	0	0	0.0836144	0	0	0
NEURL3	0.000102603	497	0.00446372	0	0	0	0	0	0	0	0	0	0	0	0	0	0	0	0	0	0	0	0	0	0	0	0	0	0	0	0	0	0	0	0.00446372	0	0	0	0	0	0	0	0	0	0	0	0	0	0
NHLRC1	0.0006603	469	0.00778023	0	0	0	0	0	0	0	0	0	0	0	0	0	0.00494712	0	0	0	0	0	0	0	0	0	0	0	0	0	0	0	0	0	0.00259267	0	0	0.00778023	0	0	0	0	0	0	0	0	0	0	0
PCGF2	0.00247886	435	0.0565191	0	0	0	0	0	0	0	0	0	0	0	0	0	0	0	0	0	0	0	0	0	0	0	0	0	0	0	0	0	0	0	0	0	0	0	0	0	0	0	0	0	0	0	0	0	0
PDZRN3	0	536.5	0	0	0	0	0	0	0	0	0	0	0	0	0	0	0	0	0	0	0	0	0	0	0	0	0	0	0	0	0	0	0	0	0	0	0	0	0	0	0	0	0	0	0	0	0	0	0
RAB40C	0.00581781	387	0.0910768	0	0	0	0	0	0	0	0	0	0	0.0218013	0	0.0177685	0.0103181	0.00520132	0.00972654	0.0721109	0	0	0	0	0	0	0	0	0.019807	0	0	0.0308559	0.0160361	0.0203216	0.0417296	0	0	0.00767573	0	0.0033428	0	0	0	0	0	0	0	0.0205483	0
RAG1	0.00361169	412	0.0692321	0	0	0	0	0	0	0	0	0	0	0	0	0	0	0	0	0	0	0	0	0	0	0	0	0	0	0	0	0	0	0	0	0.0220882	0	0	0	0.00204079	0	0	0	0	0	0	0	0	0
RAPSN	0	536.5	0	0	0	0	0	0	0	0	0	0	0	0	0	0	0	0	0	0	0	0	0	0	0	0	0	0	0	0	0	0	0	0	0	0	0	0	0	0	0	0	0	0	0	0	0	0	0
RNF148	0	536.5	0	0	0	0	0	0	0	0	0	0	0	0	0	0	0	0	0	0	0	0	0	0	0	0	0	0	0	0	0	0	0	0	0	0	0	0	0	0	0	0	0	0	0	0	0	0	0
RNF152	0	536.5	0	0	0	0	0	0	0	0	0	0	0	0	0	0	0	0	0	0	0	0	0	0	0	0	0	0	0	0	0	0	0	0	0	0	0	0	0	0	0	0	0	0	0	0	0	0	0
RNF157	0.00342698	415	0.0749528	0	0	0.00911903	0	0.0447314	0	0	0.0476026	0	0.0167507	0.0410153	0	0	0.00184563	0.00381726	0	0	0	0	0	0	0.0167343	0	0	0	0	0	0	0	0.0235715	0.00190013	0	0	0	0	0	0.00228227	0	0	0.0372253	0	0	0.0749528	0	0	0
RNF175	0.00106137	453	0.0234326	0	0	0	0	0	0	0	0	0	0	0	0	0	0.0035488	0	0	0	0	0	0	0	0.00649584	0	0	0	0	0	0	0	0	0	0	0	0	0	0	0	0	0	0	0	0	0	0	0.0234326	0
RNF180	0.000855976	464	0.021782	0	0	0	0	0	0	0	0	0	0	0	0	0	0	0	0	0	0	0	0	0	0	0	0	0	0	0	0	0	0	0	0	0	0	0	0	0	0	0	0	0	0.00697099	0	0	0	0
RNF207	0.000978799	457	0.144358	0	0	0	0	0	0	0	0	0	0.0340078	0	0	0	0	0	0	0	0	0	0	0	0	0	0	0	0	0	0	0	0	0	0	0	0	0	0.00193822	0.00190475	0	0	0	0	0	0	0	0	0
RNF208	0.00091969	461	0.0116444	0	0	0	0	0	0	0	0	0	0	0	0	0	0.00155273	0.00482519	0.00399637	0	0	0	0	0	0	0	0	0	0	0	0	0	0	0	0	0	0	0	0	0	0	0	0	0.00468729	0	0	0	0	0
RNF212	0.000169562	492	0.0217367	0	0	0	0	0	0	0	0	0	0	0.0217367	0	0	0	0	0	0	0	0	0	0	0	0	0	0	0	0	0	0	0	0	0	0	0	0	0	0	0	0	0	0	0	0	0	0	0
RNF32	0.00230662	438	0.0739585	0	0	0	0	0	0	0	0	0	0	0	0	0	0	0	0	0.0739585	0	0	0	0	0	0	0.043466	0	0	0	0	0	0	0.00450175	0	0.0204013	0	0	0.00796996	0.00137376	0	0	0.0108326	0.0125971	0	0	0	0	0
RNF43	0	536.5	0	0	0	0	0	0	0	0	0	0	0	0	0	0	0	0	0	0	0	0	0	0	0	0	0	0	0	0	0	0	0	0	0	0	0	0	0	0	0	0	0	0	0	0	0	0	0
SH3RF2	0	536.5	0	0	0	0	0	0	0	0	0	0	0	0	0	0	0	0	0	0	0	0	0	0	0	0	0	0	0	0	0	0	0	0	0	0	0	0	0	0	0	0	0	0	0	0	0	0	0
SLX4	0.00340458	416	0.0908852	0	0	0	0	0	0	0	0	0	0	0	0	0	0.00795344	0	0	0	0	0	0	0	0.0118172	0	0	0	0	0	0	0	0.012504	0.00438514	0.00846206	0	0.0105293	0.00589793	0.00304657	0.00113905	0	0.018137	0	0	0	0.0908852	0	0	0
SOCS2	0.0118716	326	0.269856	0	0	0	0	0	0	0	0.0855122	0	0	0.0377704	0	0.00734016	0.00137614	0	0	0	0	0	0.0267581	0	0.0187704	0	0.269856	0.101108	0.0178555	0.137997	0	0	0.0541516	0.0152632	0.0226818	0	0	0.126877	0	0.00136879	0.170011	0	0.0128333	0.00478109	0	0.0604302	0	0	0
SPSB2	0.0211929	229	0.295685	0.107588	0.179158	0.0647765	0.0229181	0.0560204	0.157746	0.295685	0.0726256	0.0707664	0.0524668	0.0738384	0	0.0316277	0.00711427	0.0151313	0	0.0559795	0	0.0239916	0.0283339	0	0.0122498	0	0.0308241	0.0451207	0.0771818	0.0712154	0	0.0388583	0.0203799	0.0253895	0.0645747	0	0	0.0114766	0.0140132	0.0118558	0	0.133005	0.0314278	0.00509176	0.027787	0.0368844	0.0150415	0.0675444	0
TRAF2	0.0150214	285	0.12273	0.121071	0.0492065	0.0193569	0.0200741	0	0	0	0.0558672	0.0189364	0.0373454	0.0697879	0	0	0.0152321	0	0	0	0	0	0	0	0.0133581	0	0	0	0.0110469	0.0333163	0	0.0145632	0.0545869	0.0101819	0.0177473	0.0204013	0	0.00536584	0.0138598	0.0184161	0.0726084	0	0.0183098	0.0197737	0.0257889	0.0496331	0.0172112	0	0
TRAIP	0.00992249	346	0.0941165	0	0	0	0	0	0	0	0	0	0	0	0	0	0	0.00464912	0	0	0	0.0231837	0	0	0	0	0	0	0.0111862	0.0259664	0	0	0	0.00428406	0.0064833	0	0	0.00592548	0.0244145	0.0217541	0.0303365	0.0439947	0.0155088	0.0103714	0.0207116	0.0807785	0.0108709	0.0449702	0
TRIM45	0.00191295	443	0.0569882	0	0	0	0	0	0	0	0	0	0	0	0	0	0	0.00514421	0.00470177	0	0	0	0	0	0	0	0	0	0	0	0	0	0	0.00454483	0	0	0.0106394	0	0	0.00199656	0	0	0	0.00442699	0	0	0	0	0
TRIM54	0.000240746	490	0.0108837	0	0	0	0	0	0	0	0	0	0	0	0	0	0	0	0	0	0	0	0	0	0	0	0	0	0	0	0	0	0	0	0	0	0.0108837	0.00576692	0	0	0	0	0	0	0	0	0	0	0
TRIM59	0.00847795	359	0.108532	0	0	0	0	0	0	0	0	0	0	0	0	0.00853357	0.00708306	0.00975371	0.00346857	0	0	0	0	0	0	0	0.0453311	0	0	0	0	0	0.0218972	0.0221835	0.0146413	0.0495892	0.0192247	0.0136465	0.0133766	0.0116756	0.108532	0.0190829	0.0127568	0.00434186	0.00565023	0	0.0203307	0	0
TRIM61	0.00270575	427	0.0371122	0	0	0	0	0	0	0	0	0	0	0	0	0	0	0	0	0	0	0	0	0	0	0	0	0	0	0	0	0	0.0306098	0	0.00698512	0.0371122	0	0	0.00187516	0.00566475	0	0	0	0.0126639	0.00566266	0	0	0.0250129	0
TRIM62	0.00298679	421	0.0342486	0	0	0	0	0	0	0	0	0	0	0.0207721	0	0	0.00660029	0	0	0	0	0	0	0	0.0122407	0	0	0	0	0	0	0	0	0.00432295	0	0	0	0.00756422	0.00207003	0.00100493	0	0.0111922	0	0	0.0128773	0.0342486	0.0099408	0	0
TRIM7	0.0037845	407	0.0428994	0	0	0.0428994	0.0390526	0	0	0	0	0	0	0	0	0.00930506	0.0132535	0	0.00472674	0	0	0.023505	0	0	0	0	0	0	0	0	0	0	0	0	0	0	0	0	0.00582645	0.0026132	0	0	0	0	0	0	0	0	0
TRIM9	0.00042684	477	0.0142079	0	0	0	0	0	0	0	0	0	0	0	0	0	0	0	0	0	0	0	0	0	0	0	0	0	0	0	0	0	0	0	0.00690103	0	0	0.0142079	0	0	0	0	0	0	0	0	0	0	0
UBOX5	0.00813794	363	0.104654	0	0.0330311	0.0129622	0.0145295	0	0	0	0.013005	0	0.0301897	0.0213778	0	0	0.0138359	0	0.00447822	0	0	0.0236634	0	0	0	0	0.0397228	0.0389795	0.0344121	0	0	0.0448261	0	0.00466842	0.0279539	0	0	0.0143037	0.00280629	0.00730082	0	0	0.0455015	0.00472482	0.00734695	0	0.00433907	0	0.103739
UHRF1	0.00714793	373	0.0816342	0	0	0	0	0	0	0	0	0	0	0	0	0	0.00178294	0	0	0	0	0	0	0	0.00588122	0	0	0	0	0.0309272	0	0	0	0.0533267	0.0396433	0.0220882	0	0.0506781	0	0.00810779	0	0	0	0	0.00461395	0	0.0220084	0	0
ZBTB32	0.0126829	315	0.14032	0	0	0	0	0	0	0	0	0	0	0	0.14032	0	0	0	0	0	0	0	0.108596	0	0	0	0	0	0	0	0	0	0	0	0	0	0	0	0.0197968	0.0245162	0.0615875	0	0.0283932	0.0397992	0.0104464	0.0417152	0.0388287	0	0
ZBTB46	0.0044786	401	0.0797662	0	0	0	0	0	0	0	0	0.0474104	0	0	0	0	0	0.0136418	0.00478675	0	0	0	0	0	0	0	0	0	0	0	0	0	0.0281929	0	0	0	0.0211097	0	0	0.00096361	0	0	0	0	0	0	0.00554293	0	0
ZBTB7C	0.00477283	396	0.129337	0	0	0	0	0	0	0	0	0	0	0	0	0	0	0	0	0	0	0	0	0	0	0	0	0	0	0	0	0	0	0	0	0	0	0	0	0	0	0	0	0	0	0	0	0	0
ZFAND4	0.00582823	386	0.0465606	0	0	0	0	0	0	0	0	0.0181611	0	0	0	0.0063897	0.00291621	0	0.0190249	0	0	0.0194228	0	0	0	0	0	0	0	0	0	0	0	0.00853287	0.00736041	0	0.00717795	0	0.00293334	0.00546425	0	0	0	0.0186361	0.0067588	0	0.00774649	0	0
ZNRF3	0.000294715	489	0.023153	0	0	0	0	0	0	0	0	0	0	0	0	0	0	0	0	0	0	0	0	0	0	0	0	0	0	0	0	0	0.023153	0	0.00335751	0	0	0.00591074	0	0	0	0	0	0	0	0	0	0	0
KBTBD12	0.000351627	482	0.0595869	0	0	0	0	0	0	0	0	0	0	0	0	0	0	0	0	0	0	0	0	0	0	0	0	0	0	0	0	0	0	0	0	0	0	0	0	0.00117202	0	0	0	0	0	0.0595869	0	0	0
KCND2	0.000563946	473	0.0131777	0	0	0	0	0	0	0	0	0	0	0	0	0	0	0	0	0	0	0	0	0	0	0	0	0	0	0	0	0	0	0	0	0	0	0	0	0	0	0	0	0	0	0	0	0	0
KCNG3	0	536.5	0	0	0	0	0	0	0	0	0	0	0	0	0	0	0	0	0	0	0	0	0	0	0	0	0	0	0	0	0	0	0	0	0	0	0	0	0	0	0	0	0	0	0	0	0	0	0
KLHL14	0.00346563	414	0.0506074	0	0	0	0	0	0	0	0	0	0	0	0	0	0	0	0	0	0	0	0	0	0	0	0	0	0	0	0	0	0	0	0	0	0	0	0.00230181	0.00287299	0	0	0	0.00525114	0.0106833	0.0342486	0.00942616	0.0178521	0
KLHL31	0	536.5	0	0	0	0	0	0	0	0	0	0	0	0	0	0	0	0	0	0	0	0	0	0	0	0	0	0	0	0	0	0	0	0	0	0	0	0	0	0	0	0	0	0	0	0	0	0	0
MEX3A	0.00100746	455	0.0660553	0	0	0	0	0	0	0	0	0	0	0	0	0	0	0	0	0	0	0	0	0	0	0	0	0	0	0	0	0	0	0	0	0	0	0.01471	0	0	0	0	0	0	0	0	0	0	0
OTUD7A	0	536.5	0	0	0	0	0	0	0	0	0	0	0	0	0	0	0	0	0	0	0	0	0	0	0	0	0	0	0	0	0	0	0	0	0	0	0	0	0	0	0	0	0	0	0	0	0	0	0
RAB40A	0	536.5	0	0	0	0	0	0	0	0	0	0	0	0	0	0	0	0	0	0	0	0	0	0	0	0	0	0	0	0	0	0	0	0	0	0	0	0	0	0	0	0	0	0	0	0	0	0	0
RNF183	0	536.5	0	0	0	0	0	0	0	0	0	0	0	0	0	0	0	0	0	0	0	0	0	0	0	0	0	0	0	0	0	0	0	0	0	0	0	0	0	0	0	0	0	0	0	0	0	0	0
RNF39	0	536.5	0	0	0	0	0	0	0	0	0	0	0	0	0	0	0	0	0	0	0	0	0	0	0	0	0	0	0	0	0	0	0	0	0	0	0	0	0	0	0	0	0	0	0	0	0	0	0
TRIM31	0	536.5	0	0	0	0	0	0	0	0	0	0	0	0	0	0	0	0	0	0	0	0	0	0	0	0	0	0	0	0	0	0	0	0	0	0	0	0	0	0	0	0	0	0	0	0	0	0	0
TRIM46	0	536.5	0	0	0	0	0	0	0	0	0	0	0	0	0	0	0	0	0	0	0	0	0	0	0	0	0	0	0	0	0	0	0	0	0	0	0	0	0	0	0	0	0	0	0	0	0	0	0
TRIM58	0.00265013	428	0.0671641	0	0	0	0	0	0	0	0	0	0	0	0	0.00893518	0.00474088	0	0	0	0	0	0	0	0	0	0.0367268	0	0.0116419	0.0249281	0	0.0174366	0	0.00580745	0.0161365	0	0.0159787	0	0	0	0	0	0	0	0	0	0	0	0
TRIM67	0	536.5	0	0	0	0	0	0	0	0	0	0	0	0	0	0	0	0	0	0	0	0	0	0	0	0	0	0	0	0	0	0	0	0	0	0	0	0	0	0	0	0	0	0	0	0	0	0	0
BIRC7	0	536.5	0	0	0	0	0	0	0	0	0	0	0	0	0	0	0	0	0	0	0	0	0	0	0	0	0	0	0	0	0	0	0	0	0	0	0	0	0	0	0	0	0	0	0	0	0	0	0
HECW1	0	536.5	0	0	0	0	0	0	0	0	0	0	0	0	0	0	0	0	0	0	0	0	0	0	0	0	0	0	0	0	0	0	0	0	0	0	0	0	0	0	0	0	0	0	0	0	0	0	0
KCNA2	0.00364648	410	0.0252166	0	0	0	0	0	0	0	0	0	0	0	0	0	0	0	0	0	0	0	0	0	0	0	0	0	0	0	0	0	0	0	0	0	0	0	0.00917098	0.00742844	0	0	0	0.00915196	0.00643058	0	0	0	0
KCND1	0.000136387	495	0.00593347	0	0	0	0	0	0	0	0	0	0	0	0	0	0	0	0	0	0	0	0	0	0	0	0	0	0	0	0	0	0	0	0.00593347	0	0	0	0	0	0	0	0	0	0	0	0	0	0
KCNS2	0	536.5	0	0	0	0	0	0	0	0	0	0	0	0	0	0	0	0	0	0	0	0	0	0	0	0	0	0	0	0	0	0	0	0	0	0	0	0	0	0	0	0	0	0	0	0	0	0	0
KCTD16	0	536.5	0	0	0	0	0	0	0	0	0	0	0	0	0	0	0	0	0	0	0	0	0	0	0	0	0	0	0	0	0	0	0	0	0	0	0	0	0	0	0	0	0	0	0	0	0	0	0
KCTD8	0	536.5	0	0	0	0	0	0	0	0	0	0	0	0	0	0	0	0	0	0	0	0	0	0	0	0	0	0	0	0	0	0	0	0	0	0	0	0	0	0	0	0	0	0	0	0	0	0	0
KLHL33	0	536.5	0	0	0	0	0	0	0	0	0	0	0	0	0	0	0	0	0	0	0	0	0	0	0	0	0	0	0	0	0	0	0	0	0	0	0	0	0	0	0	0	0	0	0	0	0	0	0
KLHL41	0.000349856	483	0.00536642	0	0	0	0	0	0	0	0	0	0	0	0	0	0	0	0	0	0	0	0	0	0	0	0	0	0	0	0	0	0	0	0	0	0	0	0.00304084	0	0	0	0	0	0.00536642	0	0	0	0
MKRN3	0	536.5	0	0	0	0	0	0	0	0	0	0	0	0	0	0	0	0	0	0	0	0	0	0	0	0	0	0	0	0	0	0	0	0	0	0	0	0	0	0	0	0	0	0	0	0	0	0	0
PDZRN4	0.000311023	487	0.00327927	0	0	0	0	0	0	0	0	0	0	0	0	0	0	0	0	0	0	0	0	0	0	0	0	0	0	0	0	0	0	0	0	0	0	0	0.00327927	0	0	0	0	0	0	0	0	0	0
RFPL4B	0	536.5	0	0	0	0	0	0	0	0	0	0	0	0	0	0	0	0	0	0	0	0	0	0	0	0	0	0	0	0	0	0	0	0	0	0	0	0	0	0	0	0	0	0	0	0	0	0	0
RNF112	0	536.5	0	0	0	0	0	0	0	0	0	0	0	0	0	0	0	0	0	0	0	0	0	0	0	0	0	0	0	0	0	0	0	0	0	0	0	0	0	0	0	0	0	0	0	0	0	0	0
RNF165	0.00125818	451	0.030536	0	0	0	0	0	0	0	0	0	0	0	0	0	0	0	0	0	0	0	0	0	0	0	0	0	0	0	0	0	0	0	0	0	0	0	0	0	0	0.00895316	0	0	0	0	0	0	0
SPSB4	0.00101406	454	0.0367281	0	0	0	0	0	0	0	0	0	0	0	0	0	0	0	0	0	0	0	0	0	0	0	0	0	0	0	0	0	0	0	0	0	0	0	0	0	0	0	0	0	0	0	0	0	0
TRIM10	0.00129385	450	0.0264928	0	0	0	0	0	0	0	0	0	0	0	0	0	0	0	0	0	0	0	0	0	0	0	0	0	0	0	0	0.0264928	0	0.00963478	0.0229977	0	0.00630542	0.0077114	0	0	0	0	0	0	0	0	0	0	0
TRIM17	0	536.5	0	0	0	0	0	0	0	0	0	0	0	0	0	0	0	0	0	0	0	0	0	0	0	0	0	0	0	0	0	0	0	0	0	0	0	0	0	0	0	0	0	0	0	0	0	0	0
TRIM63	0	536.5	0	0	0	0	0	0	0	0	0	0	0	0	0	0	0	0	0	0	0	0	0	0	0	0	0	0	0	0	0	0	0	0	0	0	0	0	0	0	0	0	0	0	0	0	0	0	0
TRIM72	0	536.5	0	0	0	0	0	0	0	0	0	0	0	0	0	0	0	0	0	0	0	0	0	0	0	0	0	0	0	0	0	0	0	0	0	0	0	0	0	0	0	0	0	0	0	0	0	0	0
CBLC	0	536.5	0	0	0	0	0	0	0	0	0	0	0	0	0	0	0	0	0	0	0	0	0	0	0	0	0	0	0	0	0	0	0	0	0	0	0	0	0	0	0	0	0	0	0	0	0	0	0
RNF186	0	536.5	0	0	0	0	0	0	0	0	0	0	0	0	0	0	0	0	0	0	0	0	0	0	0	0	0	0	0	0	0	0	0	0	0	0	0	0	0	0	0	0	0	0	0	0	0	0	0
TRIM15	7.63099e-05	498	0.0062977	0	0	0	0	0	0	0	0	0	0	0	0	0	0	0	0	0	0	0	0	0	0	0	0	0	0	0	0	0	0	0	0	0	0.0062977	0	0	0	0	0	0	0	0	0	0	0	0
RNF182	0.000222057	491	0.0289403	0	0	0	0	0	0	0	0	0	0	0	0	0	0	0	0	0	0	0	0	0	0	0	0	0	0	0	0	0	0	0	0.00461885	0.0289403	0	0	0	0	0	0	0	0	0	0	0	0	0
KLHL32	0.000931223	460	0.012068	0	0	0	0	0	0	0	0	0	0	0	0	0	0	0	0	0	0	0	0	0	0	0	0	0	0	0	0	0	0	0.00541693	0	0	0	0	0	0	0	0	0	0	0	0	0.00566765	0	0
RNF17	0.000121778	496	0.00529788	0	0	0	0	0	0	0	0	0	0	0	0	0	0	0	0	0	0	0	0	0	0	0	0	0	0	0	0	0	0	0	0.00529788	0	0	0	0	0	0	0	0	0	0	0	0	0	0
ASB5	0	536.5	0	0	0	0	0	0	0	0	0	0	0	0	0	0	0	0	0	0	0	0	0	0	0	0	0	0	0	0	0	0	0	0	0	0	0	0	0	0	0	0	0	0	0	0	0	0	0
BTBD17	0	536.5	0	0	0	0	0	0	0	0	0	0	0	0	0	0	0	0	0	0	0	0	0	0	0	0	0	0	0	0	0	0	0	0	0	0	0	0	0	0	0	0	0	0	0	0	0	0	0
DPF1	0.000329345	486	0.00295657	0	0	0	0	0	0	0	0	0	0	0	0	0	0	0	0	0	0	0	0	0	0	0	0	0	0	0	0	0	0	0	0	0	0	0	0	0	0	0	0	0	0	0	0	0	0
FBXL16	0.000336739	485	0.0431677	0	0	0	0	0	0	0	0	0	0	0.0431677	0	0	0	0	0	0	0	0	0	0	0	0	0	0	0	0	0	0	0	0	0	0	0	0	0	0	0	0	0	0	0	0	0	0	0
KCNA1	0	536.5	0	0	0	0	0	0	0	0	0	0	0	0	0	0	0	0	0	0	0	0	0	0	0	0	0	0	0	0	0	0	0	0	0	0	0	0	0	0	0	0	0	0	0	0	0	0	0
KCNC1	0	536.5	0	0	0	0	0	0	0	0	0	0	0	0	0	0	0	0	0	0	0	0	0	0	0	0	0	0	0	0	0	0	0	0	0	0	0	0	0	0	0	0	0	0	0	0	0	0	0
KCNG1	0	536.5	0	0	0	0	0	0	0	0	0	0	0	0	0	0	0	0	0	0	0	0	0	0	0	0	0	0	0	0	0	0	0	0	0	0	0	0	0	0	0	0	0	0	0	0	0	0	0
KCNS1	0	536.5	0	0	0	0	0	0	0	0	0	0	0	0	0	0	0	0	0	0	0	0	0	0	0	0	0	0	0	0	0	0	0	0	0	0	0	0	0	0	0	0	0	0	0	0	0	0	0
KCTD4	0	536.5	0	0	0	0	0	0	0	0	0	0	0	0	0	0	0	0	0	0	0	0	0	0	0	0	0	0	0	0	0	0	0	0	0	0	0	0	0	0	0	0	0	0	0	0	0	0	0
KLHL1	0	536.5	0	0	0	0	0	0	0	0	0	0	0	0	0	0	0	0	0	0	0	0	0	0	0	0	0	0	0	0	0	0	0	0	0	0	0	0	0	0	0	0	0	0	0	0	0	0	0
KLHL34	0	536.5	0	0	0	0	0	0	0	0	0	0	0	0	0	0	0	0	0	0	0	0	0	0	0	0	0	0	0	0	0	0	0	0	0	0	0	0	0	0	0	0	0	0	0	0	0	0	0
RFPL1	0	536.5	0	0	0	0	0	0	0	0	0	0	0	0	0	0	0	0	0	0	0	0	0	0	0	0	0	0	0	0	0	0	0	0	0	0	0	0	0	0	0	0	0	0	0	0	0	0	0
TRIM60	0	536.5	0	0	0	0	0	0	0	0	0	0	0	0	0	0	0	0	0	0	0	0	0	0	0	0	0	0	0	0	0	0	0	0	0	0	0	0	0	0	0	0	0	0	0	0	0	0	0
CCIN	0	536.5	0	0	0	0	0	0	0	0	0	0	0	0	0	0	0	0	0	0	0	0	0	0	0	0	0	0	0	0	0	0	0	0	0	0	0	0	0	0	0	0	0	0	0	0	0	0	0
KCNB2	0	536.5	0	0	0	0	0	0	0	0	0	0	0	0	0	0	0	0	0	0	0	0	0	0	0	0	0	0	0	0	0	0	0	0	0	0	0	0	0	0	0	0	0	0	0	0	0	0	0
KLHL30	0	536.5	0	0	0	0	0	0	0	0	0	0	0	0	0	0	0	0	0	0	0	0	0	0	0	0	0	0	0	0	0	0	0	0	0	0	0	0	0	0	0	0	0	0	0	0	0	0	0
RNF31	0.000399648	480	0.00906098	0	0	0	0	0	0	0	0	0	0	0	0	0	0	0	0	0	0	0	0	0	0	0	0	0	0	0	0	0	0	0	0	0	0	0	0	0	0	0	0	0	0.00615913	0	0	0	0
KCNV1	0	536.5	0	0	0	0	0	0	0	0	0	0	0	0	0	0	0	0	0	0	0	0	0	0	0	0	0	0	0	0	0	0	0	0	0	0	0	0	0	0	0	0	0	0	0	0	0	0	0
TRIM40	0	536.5	0	0	0	0	0	0	0	0	0	0	0	0	0	0	0	0	0	0	0	0	0	0	0	0	0	0	0	0	0	0	0	0	0	0	0	0	0	0	0	0	0	0	0	0	0	0	0
RFPL4A	0	536.5	0	0	0	0	0	0	0	0	0	0	0	0	0	0	0	0	0	0	0	0	0	0	0	0	0	0	0	0	0	0	0	0	0	0	0	0	0	0	0	0	0	0	0	0	0	0	0
ASB14	0	536.5	0	0	0	0	0	0	0	0	0	0	0	0	0	0	0	0	0	0	0	0	0	0	0	0	0	0	0	0	0	0	0	0	0	0	0	0	0	0	0	0	0	0	0	0	0	0	0
ECT2L	0	536.5	0	0	0	0	0	0	0	0	0	0	0	0	0	0	0	0	0	0	0	0	0	0	0	0	0	0	0	0	0	0	0	0	0	0	0	0	0	0	0	0	0	0	0	0	0	0	0
TRIM55	0.00370953	409	0.0143129	0	0	0	0	0	0	0	0	0	0	0	0	0	0	0	0	0	0	0	0	0	0	0	0	0	0	0	0	0	0	0	0	0	0	0	0.0109098	0.0143129	0	0.0129878	0	0.00867476	0.00608796	0	0	0	0
ASB10	0	536.5	0	0	0	0	0	0	0	0	0	0	0	0	0	0	0	0	0	0	0	0	0	0	0	0	0	0	0	0	0	0	0	0	0	0	0	0	0	0	0	0	0	0	0	0	0	0	0
TRIML1	0	536.5	0	0	0	0	0	0	0	0	0	0	0	0	0	0	0	0	0	0	0	0	0	0	0	0	0	0	0	0	0	0	0	0	0	0	0	0	0	0	0	0	0	0	0	0	0	0	0
FBXO40	0.000341642	484	0.00522989	0	0	0	0	0	0	0	0	0	0	0	0	0	0	0	0	0	0	0	0	0	0	0	0	0	0	0	0	0	0	0	0	0	0	0	0.00264942	0.00104941	0	0	0	0.00522989	0	0	0	0	0
ASB17	0	536.5	0	0	0	0	0	0	0	0	0	0	0	0	0	0	0	0	0	0	0	0	0	0	0	0	0	0	0	0	0	0	0	0	0	0	0	0	0	0	0	0	0	0	0	0	0	0	0
KLHL10	0	536.5	0	0	0	0	0	0	0	0	0	0	0	0	0	0	0	0	0	0	0	0	0	0	0	0	0	0	0	0	0	0	0	0	0	0	0	0	0	0	0	0	0	0	0	0	0	0	0
TRIM73	0	536.5	0	0	0	0	0	0	0	0	0	0	0	0	0	0	0	0	0	0	0	0	0	0	0	0	0	0	0	0	0	0	0	0	0	0	0	0	0	0	0	0	0	0	0	0	0	0	0
ASB11	0	536.5	0	0	0	0	0	0	0	0	0	0	0	0	0	0	0	0	0	0	0	0	0	0	0	0	0	0	0	0	0	0	0	0	0	0	0	0	0	0	0	0	0	0	0	0	0	0	0
ASB15	0	536.5	0	0	0	0	0	0	0	0	0	0	0	0	0	0	0	0	0	0	0	0	0	0	0	0	0	0	0	0	0	0	0	0	0	0	0	0	0	0	0	0	0	0	0	0	0	0	0
ASB16	0	536.5	0	0	0	0	0	0	0	0	0	0	0	0	0	0	0	0	0	0	0	0	0	0	0	0	0	0	0	0	0	0	0	0	0	0	0	0	0	0	0	0	0	0	0	0	0	0	0
KLHL40	0	536.5	0	0	0	0	0	0	0	0	0	0	0	0	0	0	0	0	0	0	0	0	0	0	0	0	0	0	0	0	0	0	0	0	0	0	0	0	0	0	0	0	0	0	0	0	0	0	0
NEURL	0	536.5	0	0	0	0	0	0	0	0	0	0	0	0	0	0	0	0	0	0	0	0	0	0	0	0	0	0	0	0	0	0	0	0	0	0	0	0	0	0	0	0	0	0	0	0	0	0	0
ZBTB9	0	536.5	0	0	0	0	0	0	0	0	0	0	0	0	0	0	0	0	0	0	0	0	0	0	0	0	0	0	0	0	0	0	0	0	0	0	0	0	0	0	0	0	0	0	0	0	0	0	0
TRIM34	0	536.5	0	0	0	0	0	0	0	0	0	0	0	0	0	0	0	0	0	0	0	0	0	0	0	0	0	0	0	0	0	0	0	0	0	0	0	0	0	0	0	0	0	0	0	0	0	0	0
TRIM43	0	536.5	0	0	0	0	0	0	0	0	0	0	0	0	0	0	0	0	0	0	0	0	0	0	0	0	0	0	0	0	0	0	0	0	0	0	0	0	0	0	0	0	0	0	0	0	0	0	0
TRIM74	0	536.5	0	0	0	0	0	0	0	0	0	0	0	0	0	0	0	0	0	0	0	0	0	0	0	0	0	0	0	0	0	0	0	0	0	0	0	0	0	0	0	0	0	0	0	0	0	0	0
KCNC2	0	536.5	0	0	0	0	0	0	0	0	0	0	0	0	0	0	0	0	0	0	0	0	0	0	0	0	0	0	0	0	0	0	0	0	0	0	0	0	0	0	0	0	0	0	0	0	0	0	0
[truncated: 18 more columns]
