# Supplementary material for: Proteolysis targeting chimeras (PROTACs) are emerging therapeutics for hematologic malignancies
Source: J Hematol Oncol. 2020 Jul 27;13:103. doi: 10.1186/s13045-020-00924-z (PMC7384229; doi:10.1186/s13045-020-00924-z)
Supplement: Supplementary file 3 — Additional file 3. List of 574 E3 ligases expressed in different types of hematopoietic cells in the blood, spleen, and bone marrow. [file 13045_2020_924_MOESM3_ESM.xlsx]

## Sheet: Sheet1
			tissue	Adipose	Adipose	Adipose	Adipose	Adipose	Adipose	Adipose	Adipose	AdrenalGland	AdrenalGland	AdrenalGland	AdrenalGland	AdrenalGland	AdrenalGland	AdrenalGland	AdrenalGland	AdrenalGland	AdrenalGland	AdrenalGland	AdrenalGland	AdrenalGland	AdrenalGland	AdrenalGland	AdrenalGland	Artery	Artery	Artery	Artery	Artery	Artery	Artery	Artery	Artery	Artery	Artery	Artery	Artery	Artery	Artery	Artery	AscendingColon	AscendingColon	AscendingColon	AscendingColon	AscendingColon	AscendingColon
			cell	Stromal cell	Mast cell	Adipocyte_SPP1 high	M2 Macrophage	Adipocyte _FGR high	Proliferating cell	Neutrophil	Unknown	Stromal cell_NOV high	NK cell	CD8 T cell	Endothelial cell	Myeloid cell	Smooth muscle cell	Lymphocyte	MT high	Endothelial cell_VWF high	T cell	Stromal cell_HES1 high	Endothelial cell_CCL2 high	Smooth muscle cell_TAGLN high	lymphatic endothelial cell	Smooth muscle cell_CCL4L2 high	Zona fasciculata cell_FDX1 high	Endothelial cell_SELE high	Basal cell	B cell (Plasmocyte)_IGHG high	Macrophage	Fibroblast_MFAP5 high	M1 Macrophage	Macrophage_CD52 high	Smooth muscle cell	Fibroblast_ CXCL12 high	Endothelial cell_VWF high	Mast cell	Fibroblast_PTX3 high	Myofibroblast_POSTN high	Epithelial cell	Fibroblast_APOD high	T cell	B cell (Plasmocyte)_IGLV3-1 high	T cell	B cell (Plasmocyte)_IGHG3 high	Macrophage	Enterocyte progenitor	Mast cell
			sex	Male	Male	Male	Male	Male	Male	Male	Male	Male	Male	Male	Male	Male	Male	Male	Female	Female	Female	Female	Female	Female	Female	Female	Female	Male	Male	Male	Male	Male	Male	Male	Male	Male	Male	Male	Male	Male	Male	Male	Male	Female	Female	Female	Female	Female	Female
			age	36Y	36Y	36Y	36Y	36Y	36Y	36Y	36Y	52Y	52Y	52Y	52Y	52Y	52Y	52Y	23Y	23Y	23Y	23Y	23Y	23Y	23Y	23Y	23Y	46Y	46Y	46Y	46Y	46Y	46Y	46Y	46Y	46Y	46Y	46Y	46Y	46Y	46Y	46Y	46Y	47 years	47 years	47 years	47 years	47 years	47 years
			nCell	415	49	76	673	30	23	23	19	650	986	1042	634	457	97	173	1023	244	245	1514	960	127	32	11	31	1175	33	140	1442	2723	353	226	207	1692	601	139	280	208	42	91	235	334	93	12	23	69	12
	overallMean	overallMeanRank	MaxCell	Stromal cell Adipose	Mast cell Adipose	Adipocyte_SPP1 high Adipose	M2 Macrophage Adipose	Adipocyte _FGR high Adipose	Proliferating cell Adipose	Neutrophil Adipose	Unknown Adipose	Stromal cell_NOV high AdrenalGland	NK cell AdrenalGland	CD8 T cell AdrenalGland	Endothelial cell AdrenalGland	Myeloid cell AdrenalGland	Smooth muscle cell AdrenalGland	Lymphocyte AdrenalGland	MT high AdrenalGland	Endothelial cell_VWF high AdrenalGland	T cell AdrenalGland	Stromal cell_HES1 high AdrenalGland	Endothelial cell_CCL2 high AdrenalGland	Smooth muscle cell_TAGLN high AdrenalGland	lymphatic endothelial cell AdrenalGland	Smooth muscle cell_CCL4L2 high AdrenalGland	Zona fasciculata cell_FDX1 high AdrenalGland	Endothelial cell_SELE high Artery	Basal cell Artery	B cell (Plasmocyte)_IGHG high Artery	Macrophage Artery	Fibroblast_MFAP5 high Artery	M1 Macrophage Artery	Macrophage_CD52 high Artery	Smooth muscle cell Artery	Fibroblast_ CXCL12 high Artery	Endothelial cell_VWF high Artery	Mast cell Artery	Fibroblast_PTX3 high Artery	Myofibroblast_POSTN high Artery	Epithelial cell Artery	Fibroblast_APOD high Artery	T cell Artery	B cell (Plasmocyte)_IGLV3-1 high AscendingColon	T cell AscendingColon	B cell (Plasmocyte)_IGHG3 high AscendingColon	Macrophage AscendingColon	Enterocyte progenitor AscendingColon	Mast cell AscendingColon
ABTB1	0.0548448	162	1.48692	0.0952344	0.0640993	0	0.110458	0.100179	0	0.125825	0	0.0774537	0.0703648	0.0748543	0.0407205	0.0957113	0.151058	0.0488106	0.040374	0.0370427	0.0507029	0.0652608	0.0346656	0.0810357	0	0.539698	0	0.0287249	0	0.0190008	0.0457114	0.034476	0.0482609	0.0321806	0.0703299	0.0466068	0.0432537	0.0394742	0.0174034	0.0131166	0.194998	0.0233539	0.0490329	0.0286581	0	0.141733	0.140829	0.0684914	0
AMFR	0.0579125	151	0.55061	0.0517975	0.246495	0.117435	0.137845	0.31116	0	0.251525	0.156946	0.0177875	0.0360597	0.0103162	0.0334976	0.0239241	0	0.0188748	0.0386239	0.0672298	0.0604731	0.0203333	0.0343843	0	0	0	0	0.0976549	0.227606	0.036345	0.127937	0.0863458	0.142044	0.186498	0.125508	0.100565	0.0695672	0.0737361	0.11175	0.174137	0.0590947	0.228094	0.122966	0	0	0	0.231932	0	0
ANAPC11	0.461258	4	1.88413	0.176166	0	0.268218	0.155592	0.190886	0.276935	0.139918	0	0.829149	0.608955	0.480864	0.527907	0.453581	0.637262	0.614705	0.750817	0.394081	0.702389	0.821649	0.469675	0.80614	0.685363	0.858989	0.824825	0.136477	0.723242	0.222024	0.232389	0.320856	0.216809	0.450961	0.199889	0.27502	0.22003	0.300826	0.202397	0.351112	0.317884	0.200362	0.208174	0.410526	0.276837	0.701135	0.954647	0.653255	0.164458
ANKFY1	0.0437669	210	0.590448	0.0807255	0.0673447	0.0955726	0.0880014	0	0	0	0.160038	0.0322983	0.0238999	0.0224215	0.0191666	0.0174102	0.0641339	0	0.0247701	0.0314335	0.0487	0.0117337	0.0375898	0.0244054	0	0	0	0.0520344	0.0637021	0	0.0458215	0.0699337	0.0570837	0.0561182	0.0159415	0.0529097	0.0557873	0.0436209	0.0471446	0.0309592	0.0670315	0.0651682	0.0609087	0	0	0	0	0	0
ANKIB1	0.0579928	149	0.323162	0.0292931	0	0.0234235	0.0680467	0	0.277623	0	0.163774	0.00408111	0.00453935	0.0154467	0.0178076	0.0109464	0	0	0.0188518	0.0118146	0.0248886	0.0131257	0.0404441	0	0.075948	0	0	0.0952917	0.170362	0.0599291	0.0665566	0.115695	0.0719594	0.0725998	0.124487	0.0884444	0.0439372	0.128671	0.13992	0.151151	0.323162	0.0568656	0.0819454	0.0334064	0	0	0	0.0528869	0
AREL1	0.025813	299	0.662736	0.0143907	0.0553542	0.0739648	0.0429454	0	0.124245	0	0	0.00713037	0.0313616	0.0267016	0.0288603	0.0429472	0.0324458	0.0378771	0.015431	0.0129869	0.0365829	0.00862622	0.01187	0	0	0	0	0.0301355	0.0542579	0.0331774	0.0277403	0.0190841	0.0621937	0.0629054	0.0152558	0.0232565	0.0129242	0.0829828	0.037908	0.0599916	0	0.152451	0.0559376	0	0	0	0	0	0
ARIH1	0.113855	50	0.843759	0.0902691	0.262195	0.078189	0.166842	0.201435	0.309693	0	0	0.0661018	0.0625815	0.0311541	0.0823058	0.0269971	0.0994272	0.0176094	0.0202284	0.0563092	0.0238693	0.0179729	0.0809441	0.0656168	0	0	0	0.383461	0.0849324	0.31459	0.284377	0.178643	0.167188	0.148161	0.222302	0.272913	0.332111	0.310907	0.525938	0.204445	0.197701	0.280705	0.25299	0.0201334	0	0	0	0	0
ARIH2	0.0885351	76	0.638046	0.0967988	0.127221	0.181652	0.096376	0	0	0	0	0.0690777	0.113385	0.0932706	0.114885	0.0753557	0.0952677	0.050776	0.100166	0.0516796	0.13426	0.0942296	0.11241	0.13342	0	0.534501	0	0.109161	0.100932	0.117373	0.0967701	0.0663176	0.074605	0.110552	0.104953	0.0914863	0.0755065	0.146772	0.0566307	0.0865499	0	0.158662	0.0952205	0.0752951	0.0602508	0.159502	0.106582	0.164747	0
ARMC5	0.0138372	401	0.421014	0.00719835	0.0400377	0	0.0191317	0	0	0	0	0.0112056	0.0308467	0.0227673	0.017719	0.0310105	0.0849396	0.0181431	0	0.012002	0.00770759	0.011428	0.0147065	0	0.191438	0	0	0.0483939	0.0732205	0.0362793	0.0205988	0.00592365	0.02525	0.0122227	0	0.0120489	0.0443026	0.0581701	0.0754282	0.0110241	0	0.0291643	0.00988235	0	0	0	0	0	0
ASB13	0.0234673	314	0.336551	0.0136104	0	0.0547016	0.00440729	0.104625	0	0	0	0.0617702	0.00828873	0.0149419	0.0136294	0.0242734	0.0308897	0	0.0475679	0.0120364	0.0399329	0.0666053	0.0314289	0.0347787	0	0	0	0.0270982	0	0.0397679	0.0175458	0.0298884	0	0.0294019	0.0404218	0.0289708	0.0423232	0.0194476	0.0113801	0.094367	0	0	0.0123285	0	0	0	0	0.216831	0
ASB6	0.0208764	342	0.441495	0.0218636	0	0.0367182	0.0043025	0	0	0	0.162707	0.0250238	0.0315545	0.0431127	0.0299261	0.0386548	0.0238228	0.0129715	0.011849	0.0212059	0.0130515	0.0279864	0.0276834	0	0	0	0	0.027134	0	0	0.0126608	0.0170769	0	0.00729038	0.0213204	0.0127462	0.0226849	0.0386397	0.0256928	0.00936441	0.138185	0.0616939	0.034377	0.0130376	0	0	0	0.0703216	0
ASB7	0.0183099	364	0.226371	0.0142278	0	0.0432227	0.0130805	0	0	0	0	0	0.0139813	0.0111746	0.0149654	0.0245397	0.0342823	0	0.00542199	0.0343366	0	0.0078782	0.0149958	0	0	0	0	0.0253928	0.226371	0.0176288	0.0271488	0.0152062	0.0277386	0.0187792	0.0271254	0.037149	0.0273256	0.0353859	0.0124986	0.0389682	0	0.0288458	0.0258628	0	0	0	0	0	0
ASB8	0.0823436	85	0.806357	0.0485925	0.0564595	0.0860193	0.031829	0.0998166	0	0.144694	0	0.0754017	0.0822828	0.0905553	0.0566481	0.044245	0.085261	0.0644684	0.0920565	0.0381406	0.0998062	0.134518	0.0809822	0.0454931	0	0.274385	0.297447	0.052208	0	0.0614492	0.0587572	0.0970638	0.0346419	0.0685319	0.0604156	0.0703756	0.0743657	0.0571827	0.0427851	0.0501248	0.11653	0	0.0842947	0.0629536	0.0558666	0.190222	0	0.0461479	0
ATRX	0.146454	33	0.927332	0.142197	0.121908	0.219346	0.134857	0	0	0.140421	0.155563	0.0503101	0.0490884	0.0759774	0.0749797	0.0493842	0.0895897	0.0315915	0.0665157	0.303099	0.124613	0.0751658	0.187748	0.0761415	0.156238	0	0	0.23395	0	0.159362	0.145289	0.182479	0.101814	0.0641082	0.157345	0.195777	0.193268	0.19645	0.151413	0.197984	0.242911	0.0905063	0.279586	0.0702856	0.0347279	0	0	0.0675461	0
BACH1	0.110134	52	0.638045	0.0994489	0.11993	0.148348	0.150933	0	0.244681	0.135381	0.155563	0.0318887	0.0531955	0.0822816	0.0847088	0.245214	0.0314459	0.200529	0.00805855	0.0640324	0.0115214	0.00749429	0.0735907	0.0244054	0	0	0	0.281971	0.203785	0.409204	0.331239	0.0978716	0.338032	0.224717	0.174736	0.120934	0.140691	0.272388	0.375777	0.175896	0.0564748	0.167595	0.0999749	0.0302278	0.157033	0	0.374976	0	0
BARD1	0.0116588	414	0.283926	0	0.0593925	0.0328308	0	0	0.109657	0	0	0	0	0.00559668	0.00509415	0	0	0.0143993	0.00176463	0.0126127	0	0.00215357	0.0121828	0.020669	0	0	0	0.00929578	0.193073	0.0191709	0.00556368	0.0082005	0.00765414	0	0.0217363	0.0155127	0.00833373	0.0182286	0.0177342	0	0	0	0.0164686	0.0132382	0	0	0.123578	0.0288675	0
BCL6	0.100706	60	0.679856	0.232598	0.192678	0.28587	0.230209	0.20012	0.109657	0.411327	0	0.0529408	0.00846819	0.020484	0.0464574	0.0340951	0.118394	0	0.0636405	0.137393	0.0660738	0.0658111	0.0739269	0.090688	0	0.300909	0	0.233773	0.443382	0.0871083	0.224717	0.212997	0.172638	0.156184	0.278834	0.363755	0.159588	0.204775	0.584783	0.21543	0.0562453	0.240421	0.257029	0.00640606	0.0343347	0	0.206124	0	0
BFAR	0.0961281	62	0.634908	0.0647314	0.057975	0.0365868	0.0924428	0.0998166	0.135025	0.28245	0	0.134445	0.128556	0.0905334	0.0965634	0.140222	0.0598996	0.0663653	0.0702183	0.148112	0.0522156	0.0745065	0.116894	0.0246814	0.212434	0	0	0.145416	0.158705	0.0687044	0.101089	0.0840225	0.0964804	0.0719931	0.0457353	0.127163	0.110433	0.0620211	0.144353	0.0618512	0.117687	0.0575725	0.0591209	0.027157	0.0620188	0.188339	0	0.140046	0
BIRC2	0.171852	25	1.03014	0.147067	0.192546	0.270434	0.193702	0.107734	0.101738	0.14124	0.149594	0.14818	0.172571	0.183737	0.236119	0.201782	0.192526	0.147284	0.176415	0.214285	0.191106	0.169732	0.190268	0.184033	0.180907	0.26653	0	0.37985	0.306513	0.14235	0.259585	0.177989	0.321046	0.251633	0.219503	0.147349	0.20582	0.282594	0.147088	0.141349	0.127207	0.287759	0.159213	0.0705585	0.276896	0.159502	0.140829	0.0472008	0
BIRC3	0.37089	10	2.68656	0.0747999	0.486197	0.179811	0.0717614	0	0	0	0	0.217539	0.303352	0.733391	0.450911	0.319827	0.231656	0.566735	0.0752134	0.0880097	0.246809	0.0527375	0.147214	0.0699667	0.322748	0.487781	0	1.29459	0.435413	1.84157	0.667629	0.201143	0.948332	0.446214	0.209463	0.174578	0.586928	1.18428	0.38676	0.428058	0.406671	0.701397	0.564986	0.888304	1.56364	0.555116	0.823072	0.557884	0.783192
BMI1	0.084966	80	0.543016	0.0782611	0.0584142	0	0.0803051	0	0.254691	0	0	0.0387071	0.0195352	0.0293736	0.0558113	0.0161812	0.0319743	0.0180945	0.0229029	0.110298	0.011396	0.0372386	0.0723678	0.0259834	0	0	0	0.160345	0.235622	0.371878	0.105826	0.145558	0.104637	0.0759965	0.138559	0.122153	0.185628	0.245428	0.121614	0.216018	0.317411	0.0818479	0.173143	0.0336988	0.0173611	0	0	0	0.247907
BRAP	0.0322264	263	0.307588	0.0226625	0	0.116381	0.0332657	0	0.152429	0	0	0.0152514	0.0426381	0.0375029	0.0229252	0.0165761	0.0992814	0.0186018	0.0199095	0.0338839	0.0106091	0.0220029	0.027402	0.0248489	0	0	0.092282	0.0313983	0.163616	0.0177212	0.0355041	0.037809	0.0194148	0.0536737	0.0584062	0.0276035	0.0364166	0.0319618	0.00870009	0.0447926	0.0608952	0.0857788	0.0553825	0.0148553	0	0	0	0.0872024	0
BTBD1	0.0392324	229	0.712484	0.053935	0	0.103056	0.034738	0	0.127471	0	0	0.0181627	0.0241201	0.0284805	0.00466197	0.0243193	0.0511957	0	0.00484359	0.026829	0	0.012677	0.0445079	0.025885	0.160716	0	0	0.0678661	0.23129	0.0539786	0.0859725	0.0554235	0.109753	0.149605	0.0545337	0.0404418	0.0406652	0.08494	0.0777845	0.0506764	0.0590947	0.0567268	0.0350793	0.00617432	0	0	0.106582	0.0232789	0
BTBD10	0.0494099	184	0.543016	0.045185	0	0.0383793	0.00962761	0	0	0.135381	0	0.0307084	0.0495347	0.0419364	0.0482267	0.0185291	0	0.0845752	0.0429391	0.048004	0.0485781	0.0437635	0.0521338	0.042579	0.199565	0	0	0.0570715	0.234641	0.0562607	0.0454955	0.0407325	0.0305848	0.0470188	0.0798797	0.0465627	0.0518933	0.0434913	0.0902296	0.0575166	0	0.055504	0.0806543	0	0.0301619	0	0	0.0973717	0
BTBD2	0.0321987	264	0.590448	0.0511646	0.0687835	0.0423435	0.0947232	0.100119	0.123578	0.116144	0	0.0222022	0.0180362	0.0182542	0.0131125	0.0213309	0	0	0.0140375	0.106296	0.012057	0.0205213	0.0530683	0	0.233274	0	0.0957938	0.0246594	0	0.0154752	0.0211438	0.0336962	0.0137063	0.0189897	0.0262077	0.0323113	0.0429433	0.0349721	0.0288991	0.0355969	0.0592629	0	0.0459011	0.00840273	0.0727041	0	0.201138	0.0388424	0
BTBD3	0.0516233	172	1.17559	0.0231725	0	0.0769795	0.0130562	0	0	0	0.162707	0.0503068	0.016526	0.0194119	0.0176195	0.0138488	0	0	0.0333331	0.0695975	0.0586399	0.0308373	0.109009	0	0.0735513	0	0	0.0623986	0.0564435	0.0186404	0.0250411	0.0254964	0.020586	0	0.120418	0.019445	0.0503276	0.0571639	0.0157087	0	0	0.263936	0.00918741	0.0227833	0	0	0	0	0
BTBD6	0.0307914	271	0.583035	0.0400806	0	0	0.0406723	0.199916	0.123578	0	0	0.00819282	0.0170827	0.0202902	0	0.00454963	0	0	0	0.0867876	0.00672086	0.00985351	0.0381368	0	0.0777193	0	0	0.0685896	0	0	0.042842	0.0622342	0.0249734	0.0702019	0.0665012	0.0700387	0.0594545	0.0621309	0.0542517	0.0952821	0.0795481	0.0590558	0.0999608	0.0218335	0	0	0	0.0529896	0
BTBD7	0.0637586	132	0.806357	0.0289974	0	0.174015	0.0196215	0	0.140118	0	0	0.0161495	0.0278398	0.0375714	0.0648142	0.0238043	0	0	0.0156661	0.0919728	0.0286137	0.0172152	0.092058	0	0	0	0	0.185898	0.0608615	0.0713173	0.128029	0.0937813	0.142065	0.100238	0.160154	0.157066	0.224173	0.155578	0.271808	0.0973857	0.0572667	0.109977	0.0920217	0.00747967	0.0350592	0	0	0	0
BTBD9	0.00750123	446	0.247902	0.0132172	0	0.0279462	0.00966136	0	0	0	0	0.0042844	0.00281006	0.00747809	0.00997363	0.00555608	0.0261213	0	0.00271947	0	0	0.00433969	0.00326514	0	0	0	0	0.00713561	0	0	0.00717958	0.0037913	0.0117785	0	0.0135793	0.0117505	0.00360716	0.0158536	0	0.00955265	0	0.0334145	0.0116153	0.0205868	0	0	0	0	0
BTRC	0.0199753	353	0.712484	0.0223456	0	0	0.0186577	0	0	0	0	0.0281124	0.00817019	0.0180149	0.00900349	0.0103066	0.0345252	0	0.0266516	0.0128898	0.04689	0.0362005	0.0152206	0.0179925	0	0	0.186889	0.0192193	0.129183	0.0679882	0.0196487	0.0233052	0.0191077	0.0342159	0.0118378	0.0265427	0.00426106	0.0369681	0.0307259	0.0331148	0	0	0.0100118	0	0	0	0	0	0
CBL	0.0362332	241	0.712484	0.0785854	0.185699	0.114766	0.11938	0.0960918	0.286539	0	0.16542	0.00743732	0.0257519	0.0127628	0.0140453	0.054738	0.0319743	0.0481715	0.00490031	0	0	0.00197431	0.0213112	0.067198	0	0	0	0.0822146	0.121622	0.0216924	0.0811285	0.0282948	0.0871502	0.187153	0.121444	0.0141525	0.076755	0.103132	0.0465268	0	0	0.0597559	0.0452834	0	0.0350592	0	0	0.021894	0
CBLB	0.0909611	72	0.835764	0.212581	0.24524	0.163625	0.058012	0.108683	0.25878	0	0.46011	0.0331208	0.0695375	0.129848	0.0654696	0.0123873	0.0317675	0	0.0143459	0.013576	0.046357	0.0228693	0.0361643	0	0	0	0	0.345272	0.248319	0.0612026	0.143882	0.237621	0.174728	0.130444	0.172115	0.217197	0.134214	0.117289	0.305758	0.200224	0.147656	0.835764	0.496698	0.0212772	0.0963977	0.160538	0	0	0
CBLL1	0.0546702	163	0.573228	0.0507797	0.0655819	0.0377646	0.0743433	0.10958	0.140118	0	0	0.0241954	0.0438792	0.068725	0.048513	0.0532962	0	0.0672137	0.00888689	0.0115747	0.0225656	0.0192364	0.0248628	0	0	0	0.102574	0.134739	0.224866	0.0644127	0.0545863	0.0451669	0.0547084	0.0732761	0.0257873	0.050346	0.0897302	0.0158536	0.116447	0.0667708	0	0.0334772	0.104543	0.0150053	0	0	0.120466	0	0.247907
CCNB1IP1	0.0568534	154	0.327753	0.0485836	0	0.039425	0.0179199	0	0	0	0.173546	0.0598087	0.014401	0.0349793	0.00972914	0	0	0	0.0276124	0.114014	0.0119325	0.0259065	0.0743461	0.106147	0	0	0	0.101496	0.0937354	0.0588913	0.0519027	0.0705603	0.0137175	0.0429867	0.0832319	0.112928	0.106373	0.05744	0.0820256	0.0917931	0.262365	0.0295358	0.116363	0.012761	0.0248124	0	0	0.0747471	0
CGRRF1	0.0678499	117	0.740428	0.0915704	0.176505	0.0647512	0.0184906	0	0	0	0	0.0385799	0.0733525	0.0521366	0.0854123	0.0464863	0.0944721	0.0498663	0.0593968	0.0436281	0.0555733	0.0768994	0.0430223	0.0167441	0	0	0	0.0629254	0.0409454	0.0173259	0.0630378	0.0568544	0.114551	0.0702298	0.0901108	0.0698681	0.0718217	0.0790868	0.108459	0.0600358	0.0572667	0.201236	0.00980552	0.0124574	0	0	0	0.0339248	0
CHFR	0.0274409	292	0.972588	0.0401957	0.190775	0.0625736	0.0783659	0	0	0	0	0.014413	0.0465166	0.0322051	0.0380989	0.0423213	0	0.0593607	0.0235048	0.0172499	0.0493497	0.0105196	0.0277103	0.0285978	0	0	0.117315	0.0383175	0	0.0775846	0.0596061	0.0180672	0.0935687	0.0529166	0.0367952	0.0127015	0.0231341	0.0358965	0.0272197	0.0101708	0	0	0.0385246	0.0260291	0.0328812	0	0	0	0
CISH	0.0221215	328	0.294628	0.0068489	0	0	0	0	0	0.135381	0.155563	0.00469565	0.00532384	0	0.009616	0.0114096	0	0	0	0.00936169	0	0	0.0122337	0	0	0	0	0.0190835	0	0.0315427	0.0299032	0.010005	0.024732	0.0163905	0	0.0517529	0.0531418	0.0193548	0.0586898	0.0108546	0	0	0.0101501	0	0.0283153	0	0	0.0668985	0
CNOT4	0.0477807	192	0.274055	0.0742027	0	0.0825182	0.0313154	0	0	0.141761	0	0.0130172	0.0224951	0.0406567	0.0438495	0.0296086	0.027895	0.0714003	0.0287287	0.0375933	0.0223247	0.0315497	0.0435836	0.0224284	0	0	0	0.0822778	0	0	0.0705419	0.0776758	0.11179	0.0611987	0.117906	0.108865	0.0589683	0.0764312	0.152741	0.03535	0	0.0581019	0.0839248	0.0305234	0.0524814	0	0	0	0
CPSF1	0.030539	273	0.256207	0.0308478	0.0685633	0.036794	0.0598189	0.108925	0	0	0	0.00657038	0.0282089	0.025834	0.01397	0.00626323	0	0	0.0127254	0.0582191	0.0188226	0.0191349	0.0289454	0	0	0	0	0.0269321	0	0.0309984	0.0333201	0.0433311	0.0213122	0.0100933	0.0625464	0.0376563	0.0446479	0.0163711	0.030379	0.0509203	0	0.0594282	0.0206688	0.0331638	0.0347279	0	0	0.0707572	0
CRBN	0.121287	48	0.848663	0.0861399	0.130762	0	0.089605	0.107734	0	0	0.32881	0.137427	0.089731	0.108133	0.106793	0.0642231	0.0828661	0.0964758	0.0888473	0.176081	0.163771	0.137574	0.122037	0.0841185	0.163318	0	0.097844	0.153764	0	0.0997902	0.108117	0.140411	0.14073	0.0631092	0.170473	0.134475	0.177367	0.16854	0.113114	0.0732593	0.0749851	0.0609701	0.238214	0.0592134	0.191468	0	0.0847093	0.15573	0.168734
CUL9	0.0108063	421	0.292765	0.0202613	0	0.032474	0.0278635	0.105919	0.13854	0	0	0	0.0357617	0.0119754	0.00487923	0.00639344	0.027895	0	0	0	0	0.00301687	0.00995675	0	0	0.292765	0	0.00304681	0	0	0.0162699	0.0116412	0.0161109	0.00986018	0	0.00501699	0.0309769	0	0	0.0106922	0	0.0311177	0.0236678	0	0	0	0	0	0
DDB1	0.136419	40	0.826206	0.124521	0.108423	0.211571	0.152141	0.106438	0	0	0	0.371134	0.178547	0.219797	0.133179	0.16761	0.307287	0.0897141	0.195154	0.125891	0.139719	0.185316	0.137376	0.149205	0.0977579	0	0.190245	0.177814	0.279905	0.100154	0.121647	0.118345	0.207213	0.191402	0.0701646	0.118877	0.0744244	0.146291	0.135184	0.153796	0.0548256	0.146998	0.150416	0.0250452	0.0534455	0	0.0587293	0.13016	0.211773
DTX1	0.00577039	463	0.152569	0.0298685	0	0	0	0	0	0	0	0	0	0	0	0	0	0	0	0	0	0	0	0	0	0	0	0	0	0.0167444	0.0124842	0.0109684	0.0400175	0	0	0.0156074	0.00407563	0.0177556	0.0434412	0	0	0.0295358	0	0	0	0	0	0	0
DTX2	0.0172649	371	0.590448	0.0212748	0.127986	0	0.0231947	0	0	0	0	0	0.0283742	0.0166955	0	0.0328274	0	0.0333247	0.00725704	0.0219871	0.0240026	0.0125107	0.0171046	0.0224525	0	0	0	0.00450335	0	0.0370439	0.0254991	0.00629087	0.0649381	0.0736565	0	0.00173078	0	0.0209488	0	0.00769034	0	0.0310518	0	0	0	0.169307	0	0	0
DTX3	0.042619	215	0.455653	0.0141262	0	0	0	0	0	0	0.184519	0.0847325	0.00556268	0.0274207	0.0260214	0.0197225	0.097881	0	0.103085	0.0240425	0.0601891	0.0696713	0.068599	0.0887827	0	0	0	0.00707781	0	0.018992	0.00876974	0.0641357	0.0126517	0	0.0710462	0.048608	0.0234211	0.0362936	0.0086663	0.0669935	0.199628	0.0554656	0.0318825	0.0267752	0	0	0	0	0
DTX3L	0.0511072	175	0.712484	0.051278	0.0653959	0.0346489	0.075038	0	0	0.142823	0.151808	0.00359864	0.00818452	0.0145244	0.0444534	0.0319419	0	0.0127337	0.00886127	0.0860845	0.0358633	0.010336	0.0924921	0	0	0	0	0.17064	0.0657148	0.0311841	0.103568	0.0588324	0.120983	0.103696	0.0606671	0.0715373	0.127118	0.113132	0.0809424	0.0542211	0	0.11138	0.0726291	0.00688939	0.0299294	0	0	0.0693579	0
DZIP3	0.0228398	319	0.427271	0.0139013	0.0623285	0.036813	0.00923821	0	0	0	0.172244	0.0239126	0.00665622	0.00918343	0.0100865	0	0.0337385	0.0183294	0.0113763	0	0.00893937	0.0118236	0.00853342	0	0	0	0	0.0234519	0	0.0370198	0.00973439	0.0307263	0.0125696	0.0091011	0.0275099	0.0373468	0.0400653	0	0.0325264	0.0115503	0	0	0.0218273	0.00525395	0.0580202	0	0	0	0
FANCL	0.0447162	205	0.423504	0.0270205	0	0	0.0636747	0	0	0	0.171226	0.0867071	0.0205333	0.0353423	0.0239201	0.0267288	0.0623928	0	0.142343	0.0363632	0.0733609	0.109212	0.0474028	0.0822711	0.075948	0.29999	0.10018	0.0372117	0.0542831	0	0.0361971	0.0347865	0.00738291	0.0204211	0.0157049	0.0400804	0.0780664	0.0681672	0.00934953	0	0	0	0.0325698	0.0231095	0	0	0	0.0694921	0.211773
FBXL12	0.0513827	173	0.625393	0.050338	0	0.0378267	0.0381696	0	0	0	0.149594	0.0638619	0.0413324	0.0400048	0.0403358	0.0404809	0	0.0150646	0.0249623	0.0713994	0.011241	0.0381605	0.0288143	0.133526	0.0924193	0	0	0.0220546	0.220492	0	0.0300417	0.0492732	0.00728294	0.0261817	0.0142125	0.0393794	0.0574539	0.0393169	0.0566144	0.0318694	0.0521128	0.141258	0.0224338	0.022013	0	0	0.130196	0.0232789	0
FBXL14	0.00224328	508	0.267144	0.0157259	0	0	0.00886324	0	0	0	0	0	0	0	0	0	0	0	0.00316854	0	0	0	0.0029751	0	0	0.267144	0	0.00652458	0	0	0.00433058	0.00206941	0	0	0	0.00493343	0	0	0.0114687	0	0	0	0	0	0	0	0	0	0
FBXL15	0.0415521	223	0.427271	0.0158439	0.0400377	0	0.0427077	0.108523	0	0	0	0.151606	0.0598637	0.103255	0.0998676	0.10204	0.0816365	0.0990007	0.0697009	0.0964719	0.120067	0.113734	0.0472048	0.117103	0.227827	0	0.0976626	0.0174943	0	0.0358986	0.0176928	0.0211572	0.0202097	0.0313962	0	0.0176344	0.0213071	0	0.00738009	0.0244647	0.0645174	0	0.00979517	0.0120584	0	0	0	0.178641	0.164458
FBXL20	0.0250753	303	0.306377	0.042149	0.0655819	0.0861551	0.0508126	0	0	0	0	0.0242831	0.0107964	0.00905007	0.0232786	0.0134842	0	0	0	0.0490727	0.0209436	0.0309082	0.0401098	0	0	0	0	0.0190994	0.0637021	0.090502	0.0224084	0.0443583	0.0541184	0.0211461	0.0390761	0.034254	0.0301489	0.0573834	0.0436337	0.0247518	0	0	0.0551574	0.0145317	0.0173611	0	0	0	0
FBXL3	0.12727	44	0.755031	0.119622	0	0.11301	0.100149	0.205553	0	0	0	0.00485508	0.0357096	0.0277957	0.0328631	0.0397774	0.027895	0.0332372	0.0129599	0.129725	0.0243829	0.0251144	0.0851333	0.0608814	0	0	0	0.228081	0.355916	0.231996	0.194404	0.271963	0.19836	0.256056	0.31788	0.257793	0.248098	0.352373	0.208311	0.217564	0.278653	0.202792	0.270812	0.0137771	0.0466828	0.141733	0	0	0
FBXL4	0.0308141	270	0.292568	0.0428666	0.0438423	0.0333813	0.0456168	0	0	0.135381	0	0.0292633	0.00568931	0.0117663	0.00656007	0.0175925	0	0	0.0212401	0.0728977	0.0203302	0.0307495	0.0207391	0.0382359	0	0	0	0.0263851	0.0670394	0.0343369	0.0359519	0.0499541	0.00641117	0.0277141	0.0645712	0.0468041	0.0247563	0.0391585	0.0490135	0.051291	0	0	0.021872	0.0053683	0.0197516	0	0	0.0241222	0
FBXL5	0.147467	31	0.79543	0.0556226	0.253171	0.111482	0.141018	0.205672	0.123512	0.257905	0	0.109742	0.0438263	0.0741583	0.0651179	0.0650722	0.0803281	0.0643455	0.108145	0.13196	0.061323	0.118975	0.104596	0.100737	0.0802009	0	0.106774	0.101219	0	0.074243	0.116428	0.105489	0.105535	0.103303	0.0499364	0.128864	0.182214	0.138597	0.104987	0.125995	0.179842	0.147977	0.113601	0.0276446	0.0499135	0	0.198497	0.0707346	0.185577
FBXL6	0.00723446	448	0.474727	0.00718975	0	0	0.01355	0	0	0	0	0	0.00486214	0.00877736	0.00479609	0	0	0	0.00514314	0	0	0.0036546	0	0	0	0	0	0.00711883	0.149701	0	0.00212332	0.00287206	0.00628155	0.0126581	0	0.00264793	0	0	0	0.0228032	0	0	0	0.0200647	0	0	0	0.0339248	0
FBXL7	0.0386003	232	0.543016	0.0441265	0.0668884	0	0.00994934	0	0	0	0	0.0064661	0	0.00300618	0.0218107	0	0	0	0.0219213	0.0820103	0.00672086	0.0233146	0.0354053	0.0252673	0.0802009	0	0	0.0863549	0.0409454	0.0171604	0.0460484	0.143086	0.0274346	0.0611269	0.0770456	0.174187	0.0568938	0.032308	0.128814	0.0807895	0	0.156016	0.068181	0	0	0	0	0	0
FBXO11	0.107519	54	0.662952	0.0813244	0.130478	0.158905	0.139876	0.0872623	0.268608	0.131959	0.149835	0.0539949	0.0487399	0.0213054	0.105695	0.042863	0.0262099	0.0170749	0.0364294	0.0686545	0.0243401	0.0129131	0.0848285	0.0406261	0.0984847	0	0	0.245097	0.145035	0.144756	0.158464	0.118135	0.143237	0.183237	0.120891	0.123711	0.157372	0.304538	0.324057	0.146869	0.317273	0.302106	0.205224	0.0332096	0	0.177155	0.140829	0.12869	0
FBXO17	0.0211527	338	0.220333	0.034444	0	0	0	0	0	0	0	0.0162977	0	0.00281044	0.0240483	0.00568003	0.0476636	0	0.0231793	0.0635039	0.0341143	0.0454532	0.0398438	0.136524	0	0	0	0.00208218	0	0.0185577	0.0194554	0.0553017	0.00755331	0.0116307	0.0669964	0.0648628	0.0137946	0.03979	0.016692	0.00974287	0.141024	0.0579859	0.0687327	0	0	0	0	0	0
FBXO18	0.0439588	208	0.476273	0.0592356	0	0	0.0317751	0.104625	0	0	0.172373	0.0220964	0.0126148	0.016684	0.0127061	0.0128755	0	0.0369354	0.0125872	0.117085	0.0298594	0.0338255	0.0491809	0.0638094	0.0696838	0	0	0.066955	0	0.0351967	0.0314253	0.049033	0.0633542	0.0320732	0.0635195	0.0573623	0.0633384	0.0522748	0.0536318	0.0931691	0	0.0790305	0.0433678	0.0985746	0.0272909	0	0	0.0738288	0
FBXO21	0.0632507	133	0.573495	0.0460402	0	0	0.0335404	0	0	0	0	0.0982657	0.0235988	0.0270504	0.0560983	0.0243019	0.0348871	0.0187229	0.11796	0.166928	0.136404	0.172514	0.145494	0.0664458	0	0	0.305361	0.0645492	0	0.0348881	0.0262038	0.0885432	0.0556939	0	0.0898076	0.0624713	0.0711542	0.0360024	0.0661407	0.0607233	0.207465	0.140706	0.0819578	0.0131677	0	0	0	0.0636363	0
FBXO22	0.0386285	231	0.382486	0.0270464	0	0.0774764	0.00879651	0	0	0.116363	0	0.0385874	0.0136551	0.0363229	0.0222197	0.0402429	0	0.0591334	0.0475829	0.00916323	0.0959886	0.0576894	0.0299044	0.0183387	0	0	0	0.0325075	0.0657148	0	0.0284732	0.0370564	0.057023	0.0241635	0.0287518	0.0280695	0.0266907	0.0214147	0.0300113	0.0186253	0.0776885	0.0283006	0	0.0211044	0	0	0	0.0241222	0
FBXO24	0.000514362	539	0.0591265	0	0.0591265	0	0.00919889	0	0	0	0	0	0	0.0028234	0.00533329	0	0	0	0	0	0	0.00330794	0.00251406	0	0	0	0	0	0	0	0	0	0	0	0	0	0	0	0	0	0	0	0	0	0	0	0	0	0
FBXO25	0.0503921	181	0.849157	0.0364267	0.0623285	0.21384	0.00890655	0	0	0	0.16542	0.0792917	0.0502078	0.0580004	0.0295214	0.0413439	0.129231	0	0.0599016	0.0473264	0.0536777	0.0654212	0.0703104	0.0581747	0	0	0	0.017076	0	0.0526749	0.027492	0.0417187	0.00805614	0.0204517	0.0409656	0.0390293	0.0771573	0	0.0389355	0.0396049	0	0.0598204	0.0430102	0.0396817	0.0797191	0	0	0.0587563	0
FBXO28	0.0493815	186	0.397097	0.0676895	0.0438423	0.136069	0.0689418	0	0.260805	0	0	0.0355415	0.039871	0.0387649	0.0244142	0.0298757	0	0.0316245	0.0213239	0.0299488	0	0.0245063	0.0394475	0	0	0	0	0.117317	0	0.0547326	0.0661854	0.0488477	0.111575	0.0591297	0.0592498	0.0768082	0.0747397	0.0776148	0.0877912	0.0230202	0.0732267	0.0841656	0.109387	0.0227479	0.0510884	0	0	0	0.211773
FBXO3	0.0780995	97	0.456707	0.0570289	0.18768	0	0.0514685	0	0	0	0	0.0288285	0.0316823	0.0578633	0.037923	0.0260362	0.027037	0.031852	0.0748961	0.0531004	0.0209536	0.066501	0.0664453	0.0622796	0	0.292765	0.100777	0.078925	0.247019	0.054987	0.0417186	0.0621372	0.0623379	0.0308327	0.0755014	0.0537874	0.0755525	0.0607113	0.0651907	0.0615125	0.0537927	0.120775	0.0715729	0.0346372	0.0576936	0	0	0.149273	0
FBXO30	0.0665452	123	0.436097	0.0638759	0	0	0.0728412	0	0.127471	0	0	0.0377424	0.0213285	0.0196127	0.0494751	0.061221	0.0546357	0.0164825	0.00752307	0.0361804	0	0.00980901	0.0335487	0	0	0	0	0.17747	0	0.0926433	0.125676	0.055806	0.0703111	0.0882147	0.0526056	0.0672811	0.10484	0.195964	0.274688	0.11374	0.120801	0.254997	0.0714297	0.0290521	0.0248124	0	0	0.0644359	0
FBXO31	0.0221831	327	0.345917	0.0302392	0	0	0.0184173	0	0	0	0	0.0242838	0.0147998	0.0107858	0.00981515	0.0134176	0.0333198	0.0181675	0.00851253	0.0742783	0.0185133	0.012309	0.00855435	0	0	0	0	0.113513	0	0.0177212	0.0157714	0.0376507	0.0484267	0	0.0576316	0.0331628	0.168393	0.050044	0.0289789	0.0344906	0	0.0882885	0	0	0	0	0	0	0
FBXO32	0.06881	115	0.910176	0.0308939	0	0.0359864	0.00888144	0	0	0	0	0.105251	0.00614338	0.0567789	0.0113119	0.0131537	0.12964	0.0182292	0.0193589	0	0.0392237	0.0275833	0.00889427	0.025579	0	0	0	0.0304126	0.188689	0.138584	0.0314097	0.0437072	0.0183036	0.0328125	0.250967	0.0598593	0.0272212	0.0433089	0.123812	0.328753	0	0.062031	0.071309	0.0929357	0.0173611	0	0	0	0
FBXO33	0.0450199	202	0.685454	0.0512053	0.315763	0.0960338	0.0500672	0	0	0	0.130949	0.0137869	0.0414548	0.0240491	0.0574492	0.0239506	0.0313672	0	0.00958201	0.0228715	0	0.0108847	0.0517433	0	0	0	0	0.0553531	0.215146	0.0305176	0.0733235	0.0495389	0.0606679	0.0395262	0.0333959	0.0653451	0.0366415	0.0779834	0.131113	0.0505533	0	0	0.114192	0	0.0234895	0	0	0.0380602	0
FBXO34	0.0415897	221	0.45732	0.00729078	0	0	0.00815714	0	0	0	0	0.0313334	0.0227754	0.0294066	0.0248543	0.0392539	0.027895	0.0169276	0.00761839	0.037627	0.0243497	0.00685569	0.0093362	0	0.0793142	0	0	0.0986598	0.264935	0.0430664	0.045685	0.0222575	0.0689388	0.0539017	0.0403398	0.0377278	0.040521	0.0534495	0.0625865	0.0820273	0	0.0284998	0.0462077	0.0507897	0.162966	0	0.119324	0.155102	0
FBXO36	0.0069218	449	0.290744	0.0082285	0	0	0.00920278	0	0	0	0	0.0119121	0	0.00517636	0.00442898	0.00693393	0	0	0.0110682	0	0.0117534	0.0304384	0	0	0	0	0	0.0022951	0	0.0180452	0	0.00517549	0	0	0	0.0052145	0.00464085	0	0	0	0	0	0.0211557	0	0	0	0	0	0
FBXO38	0.0369966	238	0.540791	0.0890459	0.308002	0.258972	0.10188	0.0960918	0	0	0.160038	0.0247241	0.034139	0.0321163	0.0265062	0.0360426	0.0203179	0.0823965	0.0264559	0.0620218	0	0.027976	0.0243921	0.0147687	0	0.267144	0	0.0408365	0.0564435	0	0.0418727	0.0463146	0.043303	0.0699213	0.0546628	0.051956	0.0652353	0	0.0447123	0.0658976	0	0	0.0339328	0.00716305	0	0	0	0.0253068	0
FBXO4	0.0244074	307	0.529079	0.028485	0.058446	0	0.0263213	0	0	0	0	0.0465507	0.0169435	0.015849	0.0201364	0.00593513	0	0	0.0438352	0.0220532	0.0430515	0.0473978	0.0196012	0.0541581	0.0798563	0	0	0.020842	0	0.0151201	0.0184941	0.0362463	0.00675205	0.0187196	0	0.0261236	0.0436727	0.0169389	0.0269307	0.0515518	0	0	0.0258314	0.0376101	0.0293217	0	0	0.0750584	0
FBXO41	0.00293453	501	0.154918	0.0151642	0	0	0.0219391	0	0	0	0	0	0.00289665	0.00317415	0.00447117	0	0	0	0	0	0	0.00161215	0	0	0	0	0	0.00413738	0	0	0.00693376	0	0	0.00930722	0	0	0	0	0	0	0	0	0	0	0	0	0	0	0
FBXO42	0.0290934	286	0.464144	0.0464831	0	0.0254808	0.0400903	0	0	0.25563	0	0.0290354	0.0150877	0.0264035	0.0182906	0.033658	0	0.0160564	0.0143726	0.0107338	0	0.0165097	0.025485	0.0453425	0	0.300909	0	0.0284161	0.129664	0.0731982	0.0515814	0.0768911	0.0693634	0.0436435	0.0215933	0.0793973	0.0294201	0.0755936	0.110095	0.0494158	0	0.0286265	0.0669929	0.0211246	0.0321795	0	0.114964	0.0288675	0
FBXO44	0.028703	288	0.775473	0.0228927	0.0994937	0	0.00949505	0	0	0	0	0.122699	0.0365662	0.0393634	0.0534196	0.0187749	0.0336633	0.0173406	0.0630885	0.0211999	0.100388	0.0803057	0.0381504	0.0188739	0	0	0.0997881	0.0091985	0	0	0.0113265	0.0322727	0	0	0.0110812	0.0257891	0.0274837	0.0396226	0.0467152	0.0101708	0.0649584	0	0.0242624	0.00633007	0.0900304	0	0	0	0.219744
FBXO45	0.0179823	367	0.179874	0.014181	0	0	0.0034397	0.0947939	0	0	0.149594	0	0.015593	0.00588498	0	0.00604146	0	0	0.00890726	0.022023	0	0	0.0238094	0	0	0	0	0.0525857	0.0470616	0	0.0232535	0.0263606	0.0295632	0.0162368	0.0144142	0.0232784	0.00828909	0.0375375	0.0186039	0.0358737	0.0649584	0.0543755	0.0116785	0	0	0	0	0	0
FBXO46	0.0114006	416	0.235201	0.00788586	0	0	0.0393269	0	0	0	0	0.00945002	0.00232152	0	0.0102328	0.0243745	0	0	0.00216753	0	0	0.00687775	0.00665002	0	0	0	0	0.0154406	0.0466738	0	0.0172092	0.00605159	0.0273266	0.0331782	0.0289481	0.00947162	0.00884141	0.0417963	0	0.0282993	0.0573981	0.0244636	0.0139995	0	0	0	0	0	0
FBXO6	0.0204488	346	0.450319	0.0141581	0	0	0.00435387	0	0	0	0	0.0141023	0.0294496	0.0138592	0.00870784	0.0226758	0	0.0607721	0.0442315	0	0.040268	0.0221151	0.0190279	0.0484478	0	0	0	0.00411202	0	0.0180376	0.0135384	0.0272785	0.0266139	0.039459	0.0518311	0.00776289	0.00458701	0	0.0103127	0.0140312	0	0	0.0330701	0.00724273	0	0.194085	0	0	0
FBXO7	0.157277	27	1.45235	0.111263	0	0.265596	0.117271	0.208642	0.145034	0.260724	0	0.20309	0.179156	0.261149	0.159916	0.169052	0.31546	0.099892	0.170992	0.177046	0.178419	0.173127	0.169883	0.122549	0.261075	0.792036	0	0.133405	0.219146	0.125749	0.161098	0.108811	0.11769	0.182184	0.102875	0.102868	0.185728	0.161105	0.162175	0.138453	0.193362	0.141649	0.0457888	0.0423957	0.119763	0	0.0749015	0.113031	0.199372
FBXO8	0.0474379	193	0.474413	0.0329532	0	0.0793098	0.0222391	0	0	0.129806	0	0.047819	0.0295973	0.0286416	0.0293216	0.0144898	0	0	0.0606895	0.045866	0.0354777	0.0701949	0.0462507	0.104071	0.0744836	0	0	0.0420216	0.0637021	0.111972	0.0378467	0.0697392	0.0245718	0.0423245	0.0570781	0.0750519	0.0481857	0.0396003	0.0551173	0.12564	0	0	0.0557972	0.0135672	0	0	0.094556	0.0232789	0
FBXO9	0.0530214	168	0.496723	0.0379914	0.0454023	0.0762329	0.0871809	0	0	0	0.167824	0.145715	0.0744665	0.0790334	0.0839789	0.0197621	0.123582	0.088503	0.108543	0.0329884	0.137539	0.124065	0.0741527	0.1337	0	0	0.1018	0.0495397	0.054195	0.01415	0.0441129	0.0617469	0.0380827	0.0328072	0.0130905	0.0506661	0.0823363	0.055982	0.0651522	0.0699955	0.0521128	0.0581019	0.0837138	0.0375324	0.0307273	0	0	0.0737106	0
FBXW11	0.0716957	107	0.464144	0.0642098	0	0.062125	0.0652408	0	0.13854	0	0	0.0381871	0.0531282	0.0510473	0.0374923	0.0491163	0.0895828	0.077779	0.022932	0.0426006	0.0361924	0.036589	0.0485272	0.0411626	0	0.274385	0.092282	0.0871571	0.182029	0.0721986	0.0833338	0.0487872	0.136162	0.0557453	0.0683639	0.0585973	0.0831499	0.0169513	0.0676969	0.0341558	0.0573981	0.199543	0.134721	0.0205024	0.0347279	0	0	0.0232099	0
FBXW2	0.0921633	69	0.989216	0.095982	0.172311	0.063211	0.0946994	0.108443	0.246216	0	0.203209	0.0649447	0.100445	0.114371	0.0753958	0.0571331	0.150523	0.0484043	0.056128	0.110145	0.0779747	0.0838036	0.0884134	0.0479209	0.0936345	0.267144	0.10286	0.116675	0.136728	0.12806	0.106978	0.11077	0.114584	0.155621	0.145098	0.141418	0.203123	0.137516	0.0613482	0.129585	0.143546	0.187364	0.140229	0.0653561	0.0665285	0.188339	0.102183	0.0737735	0
FBXW4	0.0237827	312	0.26412	0.0413904	0.0614838	0.0360041	0.0376149	0	0.143039	0.109474	0	0.00933325	0.00859529	0.0203748	0.0113259	0	0.0335146	0	0.0229174	0	0.0225639	0.00705969	0.0176769	0	0.075948	0	0	0.0178456	0.0637021	0	0.0451709	0.0395712	0.0314485	0.0391155	0.0425824	0.0456782	0.0298533	0.0994876	0.0587905	0.0896277	0.124478	0.0281539	0.0452607	0.0412834	0	0	0	0	0.20534
FBXW5	0.0705812	109	0.43053	0.0271058	0	0.118192	0.0690046	0	0	0.135381	0	0.117132	0.124612	0.0890177	0.116875	0.0824008	0.15164	0.050581	0.0442558	0.150246	0.0806634	0.0650338	0.0871528	0.121449	0.13312	0	0	0.0670798	0.106704	0.0566443	0.0659389	0.0440491	0.0929957	0.112799	0.04495	0.0393799	0.0664604	0.0184635	0.046525	0.117152	0.121513	0.0281296	0.0723248	0.0471136	0.118767	0	0	0.176009	0
FBXW7	0.057943	150	0.603122	0.0436106	0.0676551	0.0364199	0.0686471	0	0	0	0.160038	0.0205155	0.0051154	0.0437551	0.0427081	0.011654	0.0333924	0.0187093	0.0172112	0.0456791	0.0383245	0.0142522	0.0485942	0.0251075	0.177732	0	0	0.106075	0.0470616	0.314209	0.0982976	0.0742899	0.0824196	0.0543286	0.0768208	0.0820155	0.0853674	0.058678	0.0936587	0.116898	0.0716437	0.0599629	0.146102	0.0546411	0	0	0	0.0756054	0.185577
FBXW8	0.00881516	432	0.309948	0	0	0	0.0152844	0	0	0	0	0	0.00285082	0.00133309	0.0077252	0	0	0	0.00805934	0	0	0.00167145	0.00341154	0	0	0	0	0.0128605	0	0	0.00890131	0.022151	0.00783716	0.0249555	0	0.0225804	0.0224306	0.0224307	0.00816938	0.0250857	0	0.0341048	0.0113513	0.0148071	0	0	0	0	0
G2E3	0.0359387	244	0.840175	0.0149449	0.0645806	0.103494	0.040669	0	0.270666	0	0.443491	0.0206383	0.0331204	0.0227272	0.0231083	0	0	0.0353891	0.0188403	0.11923	0.0118055	0.0146368	0.0382697	0	0	0	0	0.0932433	0.126475	0	0.0380062	0.0376561	0.0383885	0.07167	0.060195	0.0517524	0.0212548	0.0544754	0.0581206	0.0619073	0	0.023696	0.0210047	0	0	0	0	0	0
GAN	0.0202891	349	0.31558	0.00786828	0.0604262	0.0333813	0.0125049	0	0	0	0	0.00312478	0.0077808	0.0164293	0.00516188	0	0	0.0152563	0.00551488	0	0	0	0.0053725	0	0	0	0	0.0572761	0.0707033	0	0.00977628	0.012114	0.0209635	0.0119958	0.0121285	0.00951528	0.0350986	0.0606099	0.0350795	0.0117669	0	0.0283006	0.0129231	0.0160989	0	0	0	0	0
GMCL1	0.0395254	228	0.459005	0.0285264	0	0.0377646	0.0273693	0	0	0	0	0.0204464	0.00985527	0.0486026	0.0133808	0.0228706	0	0	0.0128961	0.0364368	0.0319462	0.0144322	0.0351429	0.0401681	0	0	0	0.0230876	0.0466738	0.0784678	0.0530357	0.0465252	0.0496396	0.0408587	0.0222723	0.0425545	0.030786	0	0.0269767	0.0361448	0.119436	0.0562386	0.0386158	0.027897	0.0656704	0	0	0.0229299	0
GTF2H2	0.0153269	387	0.317084	0.0206851	0	0	0	0	0	0	0	0.0106143	0.00843406	0.0102787	0.0135636	0.00726527	0	0	0.0145271	0.0117821	0.0192671	0.0178475	0.0118943	0.0179925	0	0	0	0.00610453	0	0.0174343	0.00919768	0.0224494	0.00743616	0	0	0.0183748	0.00869803	0.041068	0.00898128	0	0	0	0.0136794	0	0	0	0	0	0
GZF1	0.0307163	272	0.2601	0.0271548	0	0	0.0413914	0.201079	0	0	0	0.0672579	0.0201011	0.00855045	0.021039	0.0130858	0	0.0438974	0.0182551	0.0239877	0.0115092	0.0318592	0.0239278	0.0378949	0.189197	0	0	0.0457697	0	0.1095	0.0683021	0.0159951	0.0165554	0	0.0701359	0.0663306	0.0330994	0.0371714	0.153409	0.0620173	0	0.0528543	0.0746078	0.00651756	0.110198	0	0	0.0387511	0
HACE1	0.0165675	378	0.210387	0.0202146	0.063546	0	0.0321373	0.0872623	0	0	0	0	0.005009	0	0.0135921	0.00691492	0	0	0.00568693	0.0394072	0	0.00564303	0.0224898	0	0	0	0	0.0328431	0	0.0169677	0.0173624	0.0166587	0.0128771	0.0100173	0	0.0300035	0.0476954	0	0.0217985	0	0	0	0.0257123	0	0	0	0	0	0
HECTD1	0.105946	55	1.47363	0.0528637	0.0645806	0.0676883	0.0830901	0.111631	0	0	0	0.0582499	0.109969	0.0476165	0.0622741	0.0865452	0.127745	0.0788763	0.0659622	0.119042	0.0425776	0.0432142	0.0797815	0.065109	0	0	0	0.184896	0.252569	0.0661908	0.125365	0.0875821	0.241513	0.241215	0.087249	0.100449	0.101614	0.101149	0.161699	0.101812	0.0537927	0.314094	0.0960077	0.0190595	0.0443966	0	0.531288	0.0673887	0
HECTD2	0.0257956	300	0.204903	0.0514794	0.0607119	0.102901	0.108359	0.20166	0.136559	0	0	0.00921875	0.010974	0.0133459	0.0196342	0.0107536	0.0320794	0	0.00679472	0.0479082	0.0262206	0.0072431	0.022705	0	0	0	0	0.0481352	0.0732205	0	0.0685652	0.063083	0.0557505	0.0203611	0.0552074	0.0519152	0.0287116	0.0397576	0.089571	0.0972451	0	0.0324422	0.0239067	0	0	0	0	0	0
HECTD3	0.0282421	291	0.245842	0.0548931	0.0623285	0	0.0649422	0.0949978	0.129728	0	0.175156	0.0353818	0.0533633	0.0399321	0.0286268	0.0196598	0	0	0.0186466	0.0125247	0.0313639	0.0260798	0.0240132	0.0455265	0.176152	0	0	0.032059	0.0876192	0.0397376	0.0357194	0.0177811	0.00579	0.0549053	0.0161149	0.0133405	0.00800777	0.038306	0.0190115	0.0259043	0	0	0.0112005	0.024165	0	0	0.0847093	0.0311635	0
HECTD4	0.0318104	267	0.947599	0.00785084	0.191277	0.124598	0.0319981	0.108683	0.101738	0	0	0.0156238	0.0169328	0.011333	0.0156	0.012064	0	0	0.00252959	0.0681695	0	0.00658593	0.0178107	0.0199007	0	0	0	0.0268479	0	0.0186991	0.0351579	0.0397852	0.00701408	0.0356956	0.042031	0.0385094	0.0212021	0.0313656	0.0279536	0.0114078	0	0.0577705	0.0587716	0	0.0256866	0	0.21573	0	0
HERC1	0.0447319	204	0.782104	0.0539438	0.116106	0	0.105636	0.321139	0	0.145148	0	0.00585401	0.0122654	0.0173226	0.0270643	0.0139211	0	0.0179867	0.00740778	0.11968	0.0227482	0.0135428	0.0520073	0.0258655	0	0	0	0.0585937	0.0687915	0.135258	0.0651589	0.0462337	0.0870574	0.122324	0.0373901	0.0497539	0.0830264	0.0921733	0.0304955	0.0632811	0.207673	0.0280934	0.168958	0.0386463	0.0964474	0	0	0.111739	0
HERC2	0.0380323	234	0.361552	0.0298662	0.124646	0.0271661	0.0322429	0.107734	0.146421	0	0	0.0260603	0.0102323	0.0215241	0.00888432	0.00474828	0.0325563	0.0174358	0.0234024	0.0647793	0.0226069	0.0227273	0.0290341	0.0238389	0	0	0	0.0227516	0.0466738	0	0.0363258	0.0336584	0.0325804	0.00807917	0.0243945	0.0172502	0.0209399	0.0436947	0.017563	0.0655306	0	0.0332082	0.0252839	0.0247362	0	0	0	0.0354016	0
HERC3	0.0318203	265	0.293858	0.0620724	0	0.0279462	0.0758385	0.108683	0	0.131959	0.167824	0.0138821	0.0260134	0.00628005	0.0131059	0.0143295	0	0.0179513	0.015421	0.0104865	0.0136154	0.0113293	0.0240932	0	0	0	0	0.0436491	0.16568	0.0333852	0.0559868	0.0411533	0.0413706	0.0615801	0.0297482	0.0411086	0.0261554	0.0187411	0.00791664	0.0496773	0.0535926	0	0.0732641	0	0	0	0	0	0
HERC4	0.0862037	78	1.3236	0.042906	0	0.1501	0.0824951	0	0.101738	0.133547	0	0.0517048	0.030587	0.0405879	0.0438764	0.070997	0.0203179	0	0.0606877	0.0917999	0.0606033	0.0392153	0.05742	0	0.075948	0	0.1018	0.0926668	0.101706	0.0395053	0.103073	0.0765108	0.123837	0.164481	0.0811613	0.0762675	0.0966411	0.113048	0.115398	0.102573	0.0564748	0.0808923	0.102729	0.00775806	0.0984933	0.191519	0	0	0
HERC5	0.0160342	384	0.218161	0	0.107942	0	0.0136795	0	0.13854	0	0	0.00467512	0.00292207	0.0541896	0.0388355	0.00641539	0.0198088	0.0517541	0.00237201	0.0580707	0.0104257	0.0118453	0.0506415	0	0.0651472	0	0	0.0668014	0	0.0171149	0.0196499	0.00992671	0.0149027	0.0453361	0.0165105	0.0172743	0.0136161	0	0.0533799	0.0125916	0	0	0.0392585	0.0119561	0	0	0	0	0
HIC1	0.0269378	295	0.266088	0.0725588	0.0607119	0	0.0278687	0	0	0	0	0.00979576	0.0144222	0.01734	0.0594949	0.00640438	0.0198088	0.0150713	0	0	0	0	0.0546793	0	0.0720347	0	0	0.054511	0	0	0.0142403	0.0339348	0	0.0190333	0.0157049	0.0425498	0.0565172	0.033888	0.0854468	0.0348103	0.0537927	0.0523547	0.0444272	0	0	0	0	0	0
HLTF	0.0329272	258	0.806357	0.0064369	0	0	0.0234692	0	0	0	0	0.0220747	0.0102608	0.0252125	0.0158362	0	0.0334167	0.0154629	0.0382952	0.0245083	0.02042	0.0318018	0.0313835	0	0	0	0	0.0416951	0	0.0404352	0.0236912	0.0422724	0	0.029912	0.0570734	0.0418384	0.0229605	0.0404341	0.018561	0.055802	0.0776885	0	0.0317906	0.00609498	0	0	0.102183	0	0
HUWE1	0.0870131	77	0.629602	0.0734402	0.294375	0.174055	0.090053	0	0	0	0	0.0415014	0.0416962	0.0318244	0.0715534	0.0472386	0.0267192	0.0336362	0.0439286	0.0707017	0.01734	0.0315127	0.0550535	0.0224284	0	0.291309	0	0.176621	0.255771	0.110301	0.138017	0.11106	0.125379	0.126982	0.11134	0.0972406	0.140681	0.13238	0.188587	0.122066	0	0.275581	0.188724	0.0140972	0	0	0	0.112794	0
IBTK	0.0669023	121	0.438433	0.0271766	0.127654	0.100408	0.0992664	0	0	0	0.346961	0.0501084	0.0471964	0.040251	0.034502	0.0500878	0.0331054	0.0141197	0.0481417	0.0731022	0.0114048	0.0351369	0.036235	0.0486523	0	0	0	0.0642702	0.0378708	0.113683	0.090384	0.0655112	0.157066	0.11787	0.0433181	0.0686242	0.0734938	0.0743045	0.0935479	0.0874505	0	0.0546805	0.0821554	0.0230206	0.0579388	0	0.130196	0.136997	0
IRF2BPL	0.0673411	119	0.779746	0.0788514	0.105158	0.158388	0.0546423	0	0	0	0	0.0102907	0.00970721	0.0180412	0.0592086	0	0.0578245	0	0.0159411	0.130629	0.0475875	0.023506	0.230539	0.0417199	0.167377	0	0	0.224279	0.0466738	0.047046	0.0714509	0.0848547	0.0376903	0.0393552	0.170568	0.131661	0.208615	0.0355443	0.100673	0.12398	0.124502	0.0606484	0.176851	0	0	0	0	0	0
ITCH	0.0358991	245	0.431707	0.00634535	0	0.120011	0.0539851	0	0	0	0	0.0131562	0.00538586	0.00840284	0.00465653	0.00699698	0.0333198	0.0173092	0.00938189	0.0261007	0.0132111	0.00777322	0.0216731	0.0556568	0	0	0	0.0734443	0.0607602	0.0711217	0.110586	0.0604198	0.0942213	0.159057	0.0689212	0.0405706	0.0580143	0.0838565	0.047302	0.0482158	0	0.0518498	0.125333	0.0140714	0.0355914	0	0	0.0733033	0
IVNS1ABP	0.310289	11	2.02443	0.293024	0.447231	0.511655	0.741676	0.297807	0.708135	0.803039	0.473722	0.181575	0.336168	0.43131	0.387332	0.329084	0.32849	0.499022	0.0675623	0.0625217	0.140452	0.0851074	0.119905	0.0931031	0.0984847	0.274385	0.100777	0.853754	0.284175	0.223095	0.689531	0.160421	0.800564	0.590237	0.255031	0.237619	0.443624	0.273979	0.47425	0.210701	0.153398	0.177571	0.530494	0.121077	0.410387	0.160538	0.219371	0.157731	0
KBTBD2	0.0921924	68	0.805556	0.0345263	0	0.0254808	0.104291	0.24058	0.123512	0	0.149594	0.0318611	0.0746451	0.0500374	0.129982	0.069372	0.095363	0.0654907	0.0160753	0.168546	0.0558014	0.011501	0.167364	0.0426142	0	0	0	0.453777	0.210706	0.0893256	0.122392	0.0893512	0.116434	0.188598	0.126183	0.0980765	0.322733	0.120321	0.156978	0.101697	0.207417	0.204673	0.107893	0.0347852	0.0342866	0.190288	0	0	0
KBTBD3	0.0459643	196	0.464144	0.0349811	0	0.0773571	0.0365626	0	0	0	0	0.0433648	0.0224408	0.033106	0.0348581	0.0115993	0.0601638	0	0.065696	0.0766657	0.0534238	0.0700575	0.0447636	0.0220527	0	0	0.100311	0.0124186	0.140715	0.0186404	0.0251889	0.045976	0.00455841	0.0100173	0.0634763	0.0364418	0.024244	0.0725989	0.0184938	0.0701732	0.063336	0	0.0409459	0.040553	0	0.141733	0	0.105852	0
KBTBD4	0.0231429	317	0.413909	0.00681616	0	0.0639326	0.00450414	0	0	0	0	0.0453919	0.0378809	0.0424241	0.049476	0.024322	0.0314657	0.0485548	0.0171675	0.0361243	0.0220065	0.0382305	0.00926573	0	0	0	0	0.0260812	0.0645186	0.0164593	0.015122	0.0228398	0.0263893	0	0.0128747	0.0111149	0.0256114	0.0201593	0.0312192	0.0479891	0.067208	0	0.0347034	0	0	0	0	0	0
KBTBD6	0.0210177	341	0.313306	0.00789175	0	0.0251587	0.00917657	0	0	0	0	0	0	0.00314778	0.0136075	0.00601432	0	0	0.0015028	0.0240472	0.00908948	0.0183972	0.00721916	0	0	0	0.102716	0.0133318	0	0.0199225	0.00889468	0.0154125	0.0153269	0.011754	0.0313185	0.011016	0.0176835	0	0.00738009	0.0254506	0	0	0.0159547	0	0	0	0	0	0
KBTBD7	0.0296376	283	0.646677	0.0293098	0	0	0.0227844	0	0	0	0	0.0059874	0.00283021	0.0155252	0.0112362	0.0111321	0	0	0.012477	0.0126698	0	0.0237453	0.0101679	0.0136186	0	0	0	0.0154068	0.0542831	0.0208581	0.0250341	0.0511139	0.0139902	0.00961989	0.0706843	0.0423177	0.0176034	0.0907866	0.0642566	0.012789	0	0	0.0317173	0	0.0347279	0.243622	0	0.0335257	0
KBTBD8	0.0187568	357	0.335089	0.00736856	0	0.038121	0.00919664	0	0	0	0	0.00326158	0.0443165	0.0286053	0.0352392	0.0252544	0.0556037	0.0170749	0.0032481	0.0262649	0	0	0.00657624	0.0247479	0	0	0	0.0241383	0	0.15158	0.166618	0.0185024	0.111297	0.184589	0.039097	0.0299153	0.0307124	0.0222694	0.016843	0.0454408	0.0722182	0.0259117	0.0214019	0.0122004	0	0	0.0587293	0.0293284	0
KCNB1	0.00914774	428	0.302968	0	0	0	0.0145809	0	0	0	0	0	0	0	0	0	0	0	0	0	0	0	0	0	0	0	0	0.02532	0	0	0.0136254	0.00589232	0	0.0264314	0.0154366	0.0157484	0.0338487	0.0384313	0.0172056	0	0	0.0576922	0.0220603	0	0	0	0	0	0
KCNC4	0.00963806	424	0.199296	0.00794549	0	0	0.00476474	0.0998166	0	0	0	0	0.00586044	0	0.00459546	0	0	0	0.00323807	0.0469365	0	0.00220502	0.0111479	0	0	0	0	0.0184481	0	0	0.00296797	0.00498089	0.0126615	0.0106222	0	0.00618253	0.0173535	0.0187578	0	0	0.067208	0	0.012018	0	0	0	0	0	0
KCND3	0.0171042	372	0.319786	0.0831993	0	0	0	0	0	0	0	0	0	0	0	0	0	0	0.00248943	0	0	0.00187634	0	0	0	0	0	0.0228004	0	0	0.00849378	0.0892461	0	0	0.0383226	0.106786	0.0168035	0.0627565	0.0574064	0.0103347	0.319786	0.0282392	0.113627	0	0	0	0	0	0
KCTD10	0.0601165	144	0.474347	0.102909	0	0.038121	0.0487129	0	0	0	0	0.0379887	0.0867442	0.0608704	0.0761443	0.0555747	0.176596	0.0631379	0.0298185	0.112799	0.042808	0.0434638	0.0999739	0.131305	0.178991	0	0	0.133956	0.31703	0.0374371	0.0389018	0.0622049	0.0709156	0.0766127	0.107261	0.0708196	0.0732184	0.0554767	0.0568352	0.0977346	0	0.0209097	0.0949475	0.0127672	0.0509088	0	0.119324	0	0
KCTD12	0.270447	13	2.75288	0.459695	0.973341	0.334015	0.971921	0.809568	1.26339	0.554053	1.3233	0.042896	0.123369	0.0514998	0.0911201	0.109391	0.0913819	0.082049	0.0469353	0.747428	0.0632398	0.041425	0.0652652	0.0717329	0.231745	0	0.1928	1.36171	0.195419	0.199209	0.771041	0.355469	0.843795	0.662042	0.284397	0.581617	1.09367	0.432039	0.581775	0.474764	0.167851	0.35291	0.310565	0.0139104	0	0	0.339153	0.0228855	0
KCTD13	0.0161829	383	0.194226	0.0304986	0	0	0.0276077	0	0	0	0	0.0211454	0.01805	0.0107248	0.0143386	0.00664537	0.0204896	0.0171755	0.0260645	0.0390959	0.0457761	0.0261654	0.0160168	0.0490422	0	0	0	0.00853053	0.0608615	0	0.0226825	0.00899791	0.0339137	0.0294749	0.0121486	0.0127842	0.0119095	0	0.0301336	0.0103347	0	0.0280094	0.0244973	0.00736867	0.0596298	0	0	0	0
KCTD2	0.0269928	294	0.446414	0.0206476	0.126782	0	0.0140403	0.212309	0	0	0	0.00346642	0.0103206	0.00836015	0.00395175	0.0233043	0.0198088	0	0.0101933	0.0234606	0.0103506	0.0122079	0.0389038	0.0437814	0	0	0	0.0133558	0	0.0216924	0.0117163	0.0219984	0.0198332	0.0465957	0.0214869	0.0189185	0.0275586	0	0.0100233	0	0	0	0.0244781	0.014043	0.0173611	0	0	0	0
KCTD20	0.0825155	84	0.61794	0.0574804	0	0.0708457	0.148583	0	0.244241	0	0	0.0878082	0.119036	0.109523	0.101254	0.138249	0.114926	0.165269	0.021548	0.0848449	0.0230885	0.0323979	0.0609128	0.0199007	0.0720347	0	0.0982104	0.132173	0.0670394	0.20623	0.137636	0.138144	0.178138	0.0481349	0.0919082	0.0686111	0.129978	0.371911	0.127405	0.100715	0.185294	0.16179	0.168094	0.0136145	0.156501	0	0.114964	0.175782	0.185577
KCTD21	0.00821528	437	0.0843134	0.0154574	0	0.038121	0.00987079	0	0	0	0	0.0120135	0.00544816	0.00481317	0.00257867	0.0111113	0	0	0.00430646	0.0126046	0.0357014	0.0172801	0.00251117	0	0	0	0	0.0126037	0	0.01415	0.0118918	0.0101244	0.0141223	0.00844742	0.0260994	0.00723339	0.0207745	0	0.00729954	0	0	0	0.0108787	0	0	0	0	0	0
KCTD3	0.0701054	111	0.370231	0.110275	0.127066	0.0815762	0.0650652	0	0	0.109474	0	0.0410924	0.0128789	0.00488041	0.0322292	0.0265258	0	0.0178811	0.0299844	0.0708901	0.0478511	0.0432941	0.0923965	0.0520524	0.0696838	0	0	0.104233	0.15994	0.0484692	0.03945	0.138841	0.0435709	0.0618432	0.141593	0.167039	0.15245	0.0857785	0.123558	0.0557747	0.120158	0.103713	0.107971	0.00929812	0	0	0	0.0335257	0.2148
KCTD5	0.0443871	207	0.497342	0.0459371	0	0.099058	0.0717791	0.205589	0	0	0.312508	0.0326697	0.119016	0.0327955	0.0609482	0.067418	0.0305067	0.0896135	0.0143272	0.023288	0.0127092	0.0279007	0.0535637	0	0.0595683	0	0	0.0363651	0.269443	0.0345128	0.0454536	0.0220125	0.0289156	0.101063	0.0678234	0.0197949	0.0429431	0	0.040669	0.0509358	0.074137	0	0.0103298	0.0316632	0	0.141733	0	0.0273883	0
KCTD6	0.025907	298	0.214881	0.0211514	0	0.0416661	0	0	0	0	0	0.0204599	0.0175767	0.0223992	0.0080313	0.0323982	0	0.031702	0.0250415	0.0238907	0.0403948	0.0344838	0.0247588	0.0726058	0	0	0	0.0359833	0.0670394	0.01534	0.0174634	0.0335315	0.0495358	0	0.0532258	0.032243	0.0257815	0.0196277	0.0562388	0.0106326	0	0.0950317	0.0120434	0	0	0	0	0	0
KCTD7	0.0183891	362	0.194353	0.0357724	0.0400377	0.0330752	0.0274867	0	0.138637	0.135381	0	0.0165679	0.0160942	0.0173514	0.0131882	0.00675585	0.0297027	0	0.0118197	0.0129691	0.0110495	0.00974866	0.0267618	0	0	0	0	0.0178104	0.0732205	0.033092	0.0226288	0.0297705	0.0332965	0.118532	0.0137016	0.0234968	0.0271164	0.0116018	0.0186656	0.0347938	0.0535926	0	0.0353393	0.00634353	0	0	0	0.0380602	0
KCTD9	0.0672274	120	0.597282	0.0586401	0.11578	0	0.0604491	0.312001	0.273906	0	0	0.0158584	0.0219002	0.0113383	0.01484	0.0184796	0	0	0.0165683	0.0559817	0	0.00348485	0.0412359	0.0238242	0	0	0	0.15081	0.50174	0.0384698	0.0678019	0.118841	0.0934863	0.0638342	0.140779	0.129499	0.097614	0.160236	0.265525	0.080848	0	0.267803	0.124113	0.0134147	0.0195491	0	0	0.0293284	0
KDM2A	0.0797319	90	0.806357	0.0633924	0.113557	0.333824	0.104197	0.108925	0.134585	0.390476	0.160038	0.0372732	0.0189209	0.0464418	0.0382547	0.024884	0.0305425	0	0.0165936	0.095129	0.032797	0.0159859	0.0773712	0	0.0802009	0	0	0.138955	0.516932	0.0474969	0.138041	0.0960361	0.155376	0.115799	0.135151	0.130827	0.114999	0.181926	0.120286	0.113633	0.107152	0.183181	0.182163	0.0391634	0.0635332	0	0.103941	0.0289789	0
KDM2B	0.0299031	277	0.273127	0.0776112	0.0645806	0.0625736	0.121182	0.108523	0.135202	0	0	0.0093661	0.0380047	0.0458151	0.0197832	0.0137239	0	0.0179867	0.0122432	0	0	0.00223336	0.0142734	0	0	0	0	0.043926	0.0409454	0.0522611	0.0594835	0.0401081	0.121534	0.109572	0.0338148	0.0399003	0.0361098	0.0561574	0.0679956	0.024782	0	0.0702179	0.0949749	0.0296216	0.025308	0	0	0	0
KEAP1	0.0650025	130	0.761294	0.0322886	0.120936	0	0.0846721	0	0.109657	0	0	0.116583	0.107727	0.125998	0.0640703	0.0822148	0.129495	0.0766881	0.100501	0.0407403	0.0608771	0.0814564	0.0804055	0.106334	0.163567	0	0.0983335	0.0925343	0.192784	0.0771833	0.0399599	0.0468441	0.069112	0.0864495	0.0602179	0.0440412	0.076127	0.101839	0.0440076	0.00972094	0	0.0536448	0.0220679	0.0113162	0.0576048	0	0	0.0671051	0
KLHL12	0.0322365	262	0.42004	0.0970292	0	0.119585	0.0688735	0	0.146421	0	0	0.0234682	0.0276593	0.0182092	0.0472748	0.0250371	0.0855197	0.0191183	0.0213894	0.0359936	0.00908046	0.0141583	0.0325378	0	0.0696838	0	0	0.0216265	0.0796526	0	0.0404536	0.034499	0.0141102	0.0191982	0.0969647	0.0303172	0.0399742	0.0163711	0.0389866	0.0332997	0	0	0.0327964	0.0104107	0.0197516	0	0	0.0228855	0
KLHL15	0.0621945	137	0.842107	0.0550006	0	0	0.0612806	0.0960918	0	0	0	0.0358469	0.0189291	0.0118808	0.053449	0.0232151	0.0671077	0	0.0050074	0.0608262	0.0116012	0.0163093	0.0519742	0.0246814	0	0	0	0.104912	0.118835	0.0531706	0.0949328	0.106067	0.0493396	0.0275568	0.128808	0.17842	0.106941	0.0689964	0.240832	0.0273625	0	0.0284998	0.0752179	0	0	0	0	0	0
KLHL17	0.00371557	492	0.247902	0.00402496	0	0.036813	0.0048958	0	0	0	0	0	0.00214232	0	0.00445932	0	0	0	0	0	0	0	0	0.0253033	0	0	0	0	0	0	0.0154146	0.00687633	0	0.0129727	0	0.015111	0	0	0.0111426	0	0	0	0.0322433	0	0	0	0	0	0
KLHL18	0.0325871	260	0.474727	0.0460346	0.113557	0.0346489	0.0447386	0	0	0	0	0.0526593	0.0460714	0.0454236	0.0439693	0.0257457	0	0.0696674	0.0406223	0.0077178	0.00825056	0.0294182	0.021734	0.0265599	0	0	0	0.0456026	0.0988575	0.0370372	0.0302513	0.0257861	0.0286636	0.0195124	0.0362625	0.0457257	0.0367178	0.0424592	0.0581835	0.0692782	0.0606612	0	0.0693151	0.00747661	0.0363581	0	0	0	0
KLHL20	0.0426007	216	0.583035	0.0424713	0	0.0589409	0.0380031	0	0	0	0	0.0371598	0.0327016	0.01068	0.0610503	0.0253583	0.0174068	0.0360337	0.0425495	0.101428	0.0483651	0.0512126	0.0518449	0.0843134	0	0	0	0.0759504	0	0.0408076	0.0290009	0.0738068	0.0502259	0.0399719	0.114642	0.0946451	0.0908786	0.0522781	0.0264381	0.147241	0.107131	0.0296345	0.0754339	0.0121982	0.0650691	0	0	0.0692291	0
KLHL21	0.163205	26	0.990029	0.0557218	0.063546	0.0640796	0.0356808	0.20402	0	0.252404	0.168772	0.119186	0.174601	0.135197	0.157408	0.123491	0.268033	0.154872	0.0236658	0.0248262	0.0289734	0.0215607	0.0073771	0.0174311	0	0	0.0970066	0.48246	0.467256	0.30998	0.197859	0.107839	0.286247	0.407663	0.197253	0.159268	0.143642	0.18236	0.919549	0.177523	0	0.872931	0.130744	0.00747967	0.034003	0	0	0	0
KLHL22	0.0241069	309	0.435922	0.0132093	0	0.0758687	0.014149	0	0	0.138155	0	0.037712	0.0158154	0.0211658	0.0093659	0	0.0519635	0	0.0625641	0.0208799	0.0903913	0.0389698	0.0228332	0.0486545	0	0	0	0.00524941	0	0.0523973	0.00667651	0.0292375	0.0208392	0.0105266	0.0151938	0.0391372	0.0161873	0.0588853	0.018453	0.0286022	0.0660029	0	0.0472479	0.0135023	0.0266448	0	0	0	0
KLHL24	0.0937159	64	0.478853	0.0440726	0.126008	0.136857	0.0994147	0	0	0	0	0.072006	0.0749666	0.0698732	0.0657417	0.0778173	0.0975162	0.0466894	0.025844	0.0445346	0.0117019	0.0525753	0.075414	0.0259046	0.0925276	0.267144	0	0.0934422	0.233954	0.3526	0.166184	0.137295	0.0765759	0.172752	0.174118	0.145494	0.116344	0.130453	0.249537	0.111594	0.133713	0.0870715	0.320858	0.0536014	0.0993862	0	0.0847093	0.0663167	0
KLHL26	0.0128583	405	0.136157	0.00781635	0	0.0770411	0.00936497	0	0	0	0	0.0165708	0.00517769	0.00161661	0.0238516	0	0.0270127	0	0.011635	0.0138578	0	0.0069367	0.0198898	0	0	0	0	0.00992159	0	0	0.0168278	0.0142072	0.0429943	0.0424995	0.0107297	0.0237946	0.00824737	0.0336104	0.0584937	0	0.0606612	0.0249464	0.0460684	0	0	0	0	0	0
KLHL28	0.0335316	254	0.337577	0.050197	0.0400377	0.0873124	0.0343	0	0	0.131959	0.130949	0.0112317	0.0455501	0.0290311	0.0517048	0.0287733	0.0663575	0.0306392	0.00670945	0.0507379	0.0106996	0.0122211	0.018467	0	0	0	0	0.0408306	0.101257	0.0715851	0.0479575	0.0460575	0.058805	0.0856453	0.0305917	0.0436889	0.0544519	0.0162044	0.0592066	0.0366464	0.0601759	0.106397	0.0367187	0.0383472	0	0	0	0.0299569	0
KLHL29	0.00765532	444	0.202196	0.0223434	0	0	0	0	0	0	0	0.00841943	0	0.00311077	0	0.00622613	0	0	0.00591924	0	0	0	0	0.0230721	0	0	0	0.00488265	0	0	0.00293747	0.0159882	0	0	0	0.0152439	0.00434026	0	0.0440588	0.00974287	0	0	0	0	0	0	0	0	0
KLHL36	0.0416707	220	0.194941	0.037212	0.194941	0.0333813	0.0684757	0	0	0	0	0.0376059	0.028925	0.0240149	0.0327352	0.0130202	0.0348871	0.0165812	0.0205092	0.034641	0.0127092	0.0119092	0.0373661	0.0585774	0	0	0	0.0630745	0.126249	0	0.0422581	0.0643034	0.0684897	0.0323905	0.0397766	0.0411345	0.0495624	0.0402421	0.0379233	0.0306756	0.0590947	0.117654	0.126072	0.0393868	0.025271	0	0.167481	0.0761045	0
KLHL42	0.0448354	203	0.668177	0.02817	0	0	0.0294397	0.108683	0	0	0	0.0128437	0.00506421	0.00866053	0.00883356	0.00610631	0	0	0.0161108	0.0209083	0.00881795	0.0225744	0.0248166	0.0238389	0	0	0	0.0343703	0	0.0308274	0.0338775	0.0616074	0.022112	0.0477331	0.184575	0.0596153	0.0728625	0.053724	0.0894312	0.150928	0.131661	0.180491	0.0743101	0.00605036	0	0	0	0.021894	0
KLHL5	0.0395636	227	0.30019	0.0236618	0.116328	0.0982938	0.0183278	0.108443	0.251049	0.13441	0	0.0189756	0.00809183	0.0157769	0.0436122	0.0196735	0	0	0.0283211	0.069631	0.0472384	0.0136694	0.1275	0	0	0	0.100377	0.0916998	0.135759	0.0691019	0.0746045	0.0171719	0.0589148	0.0990405	0.0546046	0.0339862	0.0707478	0	0.0322016	0.0379982	0.0503391	0	0.0424884	0.00751986	0	0	0.0723212	0	0.164458
KLHL6	0.0203387	348	0.55956	0	0.123499	0.0741402	0.04116	0	0	0.13389	0.346383	0.0199065	0.0813989	0.0121198	0.00697264	0.0125953	0.0279489	0.0146708	0.00745385	0	0.00979104	0.00182178	0.00653114	0	0	0	0	0.0599403	0	0.399046	0.193089	0.018997	0.138259	0.204775	0.0118052	0.0207618	0.0135614	0.0767095	0.0165284	0.0216418	0.0537927	0.0307449	0.121929	0.0485352	0.0562647	0	0.181073	0	0
KLHL7	0.0452502	200	0.680399	0.0290303	0.116579	0.0762337	0.0457461	0.199267	0	0.255095	0	0.063325	0.0382414	0.0254005	0.0353622	0	0.0344979	0	0.0662499	0.0128379	0.0911894	0.0522575	0.038958	0.0681046	0.0981521	0	0.0976626	0.0233295	0.0849324	0.0608477	0.0290656	0.0558322	0.0594635	0.0301661	0.0265661	0.0671414	0.075621	0.104666	0.0580877	0.119108	0.132321	0.0273744	0.108947	0.0255992	0.0327573	0	0	0	0
KLHL8	0.0379671	235	0.524756	0.0366595	0.0656757	0.0717483	0.0583724	0	0	0.116144	0	0.0175478	0.0172849	0.0159946	0.0183798	0.0132296	0.0573394	0	0.0155004	0.0945693	0.0252185	0.0221045	0.0395798	0	0.0595683	0.268386	0	0.0609772	0.125016	0.0337368	0.0433283	0.0403422	0.025291	0.0444045	0.0253119	0.0361418	0.0232174	0.0570169	0.0725592	0.0452328	0	0	0.0557034	0	0	0	0	0	0
KLHL9	0.0510032	177	0.5864	0.0209481	0.0892446	0.0369663	0.0279861	0	0	0.144694	0.130949	0.0199356	0.0409969	0.0272205	0.0149405	0.0443501	0	0	0.0353896	0.0463206	0.0535005	0.0209225	0.052753	0.0186077	0.181397	0	0	0.0435664	0	0.0321632	0.0455171	0.065802	0.0538502	0.0230571	0.057176	0.0361809	0.0381044	0.0202541	0.0263599	0.0645805	0	0	0.0663829	0.00734239	0.0328812	0	0	0.0380602	0
LGALS3BP	0.375769	9	1.45815	0.210205	0.24453	0.036794	0.064913	0	0	0	0.672991	0.563602	0.141209	0.249766	0.171654	0.180939	0.0680217	0.121758	0.491586	0.104958	0.453068	0.51288	0.0949989	0.294298	0.0720347	0.505923	0.0997881	0.0496753	0.569691	0.117064	0.206832	0.255136	0.37282	0.284987	0.238698	0.378145	0.101525	0.152262	0.20108	0.384462	0.839203	0.259597	0.277166	0.0695136	0.108264	0	0.0847093	0.775425	0.472512
LNX2	0.0256163	301	0.362566	0	0	0	0.0187848	0	0	0	0	0.0241521	0.00262914	0.00589036	0.0145955	0.00641539	0	0	0.010666	0.0111595	0.0315281	0.0117184	0.016117	0	0	0	0	0.0853954	0	0.0727064	0.0272571	0.0149161	0.0231842	0.0331533	0.0546878	0.0282425	0.0493026	0.0210802	0.0388767	0.0188916	0	0	0.0505799	0.0136465	0.0195491	0	0	0	0
LONRF1	0.0546065	164	0.806357	0.0760153	0.118579	0.0395926	0.103387	0.10958	0	0	0	0.0161851	0.00248521	0.0137465	0.0341088	0.0228477	0.0642795	0	0.0116324	0.0581196	0.0123726	0.00829298	0.0701723	0	0	0.248389	0	0.104999	0	0.0165058	0.114083	0.107549	0.0746392	0.0535206	0.160223	0.169416	0.104326	0.132761	0.215418	0.0939369	0.136292	0.498151	0.0889906	0.0202082	0	0	0	0	0
LONRF3	0.019655	354	0.21329	0	0.0617865	0.0446911	0.0134729	0	0	0	0	0.0154318	0.0326197	0.0136604	0.0376627	0.0446939	0.0655579	0.0330718	0.0113856	0.0111055	0.0132207	0.00843368	0.00943016	0	0.0976927	0	0	0.079457	0	0	0.0630251	0.0410171	0.104642	0.108512	0.0200397	0.0655127	0.0364627	0.0801434	0.160781	0.0535477	0	0.0864022	0.0256239	0	0	0	0	0	0
LRSAM1	0.0134399	403	0.712484	0.00781065	0	0.0384011	0.0289012	0	0	0	0	0.017914	0.0388987	0.0165464	0.0188796	0.00573354	0.06344	0	0.0202046	0.0371646	0	0.0230452	0.0140243	0	0.0936345	0.362248	0	0.00637618	0	0.0379482	0.00656536	0.0145792	0	0.0186796	0	0.0147859	0.0174614	0	0	0.0190225	0	0.0327299	0	0.00827047	0	0	0.140829	0.0533962	0
LTN1	0.0488888	189	0.806357	0.0426827	0	0.0639764	0.0410989	0	0	0.121205	0	0	0.0140324	0.020029	0.0185583	0	0.0301388	0.0186822	0.00810757	0.0316337	0.0255475	0.0185033	0.0502328	0.025788	0	0	0	0.0944396	0.130233	0.167408	0.04976	0.0829281	0.0445246	0.0542885	0.102382	0.0477724	0.088278	0.0182363	0.0581084	0.050873	0	0.0543232	0.202403	0.00675288	0	0	0.0749015	0.113004	0
LZTR1	0.0211201	339	0.266905	0.0302719	0.0645806	0.0431577	0.0314799	0.108683	0	0	0	0.00808225	0.0162035	0.0202722	0.0243581	0.0061126	0.0325563	0.0190023	0.0100948	0.0584901	0.0123421	0.0108927	0.0154935	0	0.0930203	0	0	0.0248805	0	0.0181213	0.0278481	0.0445076	0.00699718	0	0	0.0336459	0.0423263	0.0187578	0.0198334	0.0489276	0.116929	0	0.041063	0	0	0	0	0	0
MAP3K1	0.0424446	217	0.379636	0.0225963	0.127229	0.0419267	0.156173	0.0949978	0	0.375842	0	0.00457133	0.0214688	0.00542704	0.00498783	0.00535985	0	0.0139455	0.00488477	0.0377275	0.0243471	0.00895132	0.0460487	0	0	0	0	0.100524	0.0542831	0.0217739	0.0676267	0.0247526	0.0244461	0.118837	0.0551619	0.0359779	0.0663504	0.0318136	0.0264183	0.0510514	0.0548256	0.169075	0.0625505	0.0245643	0	0	0.121019	0	0.247907
MDM2	0.0782707	96	0.911378	0.0671143	0.133144	0.0977555	0.127964	0	0	0	0	0.0416107	0.0357998	0.0483176	0.0387083	0.0919361	0.0468215	0.0633749	0.0308043	0.0524663	0.045876	0.0161447	0.0223637	0.0199425	0.100351	0	0	0.0813619	0.0979011	0.358014	0.233761	0.104579	0.339289	0.36778	0.133271	0.107669	0.108326	0.0541459	0.119476	0.208641	0.129042	0.151224	0.108537	0.0433478	0.0313815	0	0	0.080288	0.213961
MDM4	0.0595319	146	0.500589	0.0831814	0	0.0593036	0.179453	0.216542	0.141761	0.121205	0.330719	0.00873443	0.00877369	0.0224208	0.0177154	0.0178525	0	0	0.0265616	0.080184	0.0130332	0.0196988	0.0437655	0	0.0777193	0	0	0.123004	0	0.187158	0.128285	0.0977013	0.113617	0.0785569	0.078822	0.113982	0.106057	0.0776843	0.0848243	0.113088	0.0601759	0.0867968	0.12545	0.0426634	0	0	0	0.0610146	0
MEX3B	0.0235825	313	0.226068	0.0402816	0	0.0258554	0.00897493	0	0	0	0	0.00486505	0.00913503	0	0.0325844	0.0130626	0	0	0	0.0123396	0	0	0.030899	0	0	0	0	0.07642	0.0378708	0.0201837	0.0537209	0.052198	0.0358634	0.0372393	0.0548888	0.100388	0.100233	0.0185844	0.126603	0.115441	0.129485	0.0319626	0.0588936	0	0	0	0	0	0
MEX3C	0.0932555	65	1.44126	0.0609912	0	0.0271661	0.0448014	0.205071	0.409988	0	0	0.0216537	0.0137773	0.0145566	0.0498524	0.00716112	0	0.0509657	0.00527432	0.123143	0.0267762	0.0133806	0.0538781	0.019092	0	0	0	0.287353	0.0811012	0.163694	0.0704701	0.0715559	0.0835157	0.0816973	0.185403	0.0735999	0.182994	0.121606	0.16349	0.0615546	0.135412	0.226946	0.126004	0.0148963	0	0	0.094556	0.0339248	0
MEX3D	0.0340753	252	0.360601	0.07272	0.0653959	0.0279462	0.0230435	0	0	0	0	0.00393476	0.00287803	0.00327992	0.0088649	0	0	0.0184574	0.00480346	0.0472871	0	0.00332161	0.0309171	0	0	0	0	0.087869	0.360601	0.0164593	0.0376403	0.0410904	0.043488	0.122196	0.013687	0.0474989	0.060807	0.0179875	0.103824	0.0337328	0.0572667	0.147073	0.0568444	0	0	0	0	0	0
MGRN1	0.0301646	276	0.478853	0.0591307	0	0.21775	0.0521103	0	0.141137	0	0	0.0314786	0.0255356	0.0292719	0.019233	0.00666615	0.0334411	0.0173092	0.0204812	0.00895585	0	0.0243067	0.014344	0	0	0	0	0.0267668	0	0.0921478	0.0454435	0.0244124	0.0659878	0.0604472	0.0528161	0.0126273	0.0141361	0.0190054	0.00686057	0.0366925	0	0.0891685	0.0836856	0.0162895	0.0347279	0	0	0.0241222	0
MIB1	0.0502139	182	0.254191	0.0531191	0	0.0659599	0.0449308	0.105122	0	0.116144	0.173546	0.00248	0.00731616	0.00638922	0.0291669	0.00701678	0.0279219	0	0.00230664	0.0543237	0.0132984	0.00703992	0.0360643	0.0235222	0	0	0	0.100608	0.103505	0.0404108	0.0403034	0.0850442	0.0410735	0.0424004	0.11959	0.0721289	0.0734918	0.0609205	0.0941621	0.196873	0.133341	0.120481	0.111121	0	0	0	0	0	0
MIB2	0.0205695	344	0.529596	0.00696954	0.0570977	0	0.0178474	0.0872623	0	0	0	0.0220235	0.0270868	0.0422464	0.0263317	0.0123204	0.030927	0.0174145	0.0307274	0.0362602	0.0348059	0.0169235	0.00823888	0	0	0	0	0.0150906	0	0	0.0160115	0.0222678	0	0.00807917	0.0127856	0.0205976	0.0180159	0	0.0164889	0.0120552	0	0	0.0234023	0.0469701	0.0536152	0.159502	0	0.0289789	0
MKRN1	0.111248	51	0.697675	0.118052	0.0645806	0.0333813	0.112108	0.303183	0.247757	0	0	0.0622279	0.110048	0.0755814	0.0718786	0.0861811	0.0570592	0.0761375	0.0225741	0.0341251	0.0386806	0.055169	0.0472917	0.0831738	0	0	0	0.05291	0.230035	0.162979	0.160424	0.106166	0.17414	0.177264	0.186862	0.103445	0.104553	0.174312	0.205334	0.100215	0.108618	0.10892	0.097161	0.0207798	0.178974	0.160538	0	0.0982626	0
MKRN2	0.0429708	212	0.488639	0.0231218	0.0564595	0.101685	0.0175163	0	0	0	0	0.0268863	0.0411407	0.0556985	0.00518518	0.00641171	0.0174068	0.0457538	0.0180971	0.0325537	0.0216494	0.0311844	0.023783	0	0.0651472	0	0	0.0589889	0.0928416	0.0750808	0.0364727	0.0375152	0.0616333	0.021724	0.0704366	0.057471	0.0596285	0.0965573	0.0592304	0.026349	0	0.115041	0.0320353	0.0204366	0.0301619	0	0	0.138504	0
MNAT1	0.0459387	197	0.476273	0.0407201	0.0619398	0.0367182	0.0227914	0	0	0	0	0.0582599	0.00514513	0.0344704	0.0261046	0.0262605	0.0279489	0	0.0916442	0.0188136	0.0846829	0.0731373	0.0748805	0	0	0.26653	0.100777	0.0367669	0.0608615	0	0.0165718	0.0465827	0	0.0123796	0.0869324	0.0367284	0.0203306	0	0.00973423	0.0473658	0	0.0832292	0.0487073	0.0196795	0.0318749	0	0	0.0288675	0
MSL2	0.0360518	242	0.717695	0.0297924	0.0645806	0.0415237	0.037392	0	0	0	0.322744	0.0161254	0.0324656	0.0264099	0.0311962	0.0129956	0.0343895	0.0186018	0.00886843	0.0122948	0.0246	0.0106289	0.0273165	0	0	0	0	0.0910031	0.136728	0.0313959	0.0648596	0.0556005	0.0572778	0.00997992	0.0128808	0.0566521	0.0980229	0.102421	0.0386584	0.0614207	0	0	0.107121	0	0.0197516	0	0	0	0
MUL1	0.0389309	230	0.650003	0.030897	0	0	0.0311874	0	0.101738	0.139918	0	0.0644498	0.0692964	0.0688235	0.0370389	0.071836	0.224132	0.0677763	0.0262048	0.0502181	0.0448452	0.051208	0.0231152	0.130089	0	0	0	0.0332011	0.0687915	0.0353528	0.0255944	0.0262771	0.0307957	0.0584933	0.00948261	0.0188548	0.0392958	0	0.0167657	0.0343619	0	0	0.0722002	0.0276238	0	0	0	0	0
MYCBP2	0.0794842	91	0.458338	0.142924	0	0.179425	0.120669	0.100179	0.109657	0.411843	0	0.0234088	0.0211982	0.0273349	0.036256	0.0321264	0.0315652	0.0496099	0.0230035	0.108882	0.0693016	0.0145457	0.0739161	0.0255603	0	0	0.102574	0.136346	0.131558	0.0869076	0.0847972	0.144294	0.0644449	0.0666582	0.101715	0.195331	0.114867	0.142861	0.177254	0.157057	0.128125	0.0950988	0.188069	0.0203705	0.0586715	0	0.108752	0.0241222	0
MYLIP	0.135338	41	0.866016	0.045497	0.209702	0	0.101433	0.200647	0	0.136193	0.149835	0.0464574	0.0328826	0.0474718	0.089933	0.0432859	0.0979734	0.0154629	0.0140124	0.157789	0.0130515	0.0400698	0.135361	0	0	0	0	0.317559	0.337268	0.0772267	0.269361	0.15244	0.160861	0.353964	0.435279	0.190926	0.181804	0.30582	0.55236	0.225399	0.0829931	0.367509	0.175787	0.0458092	0.0529412	0	0.0847093	0.034595	0
MYNN	0.0687639	116	1.39288	0.0381118	0	0	0.0303911	0.0985805	0	0	0	0.0376461	0.0474156	0.0502525	0.0688311	0.0402707	0.0342823	0.0186958	0.0680282	0.0497918	0.119024	0.0520026	0.0454658	0.0476339	0	0	0	0.168032	0.122047	0.126164	0.0474283	0.0811174	0.0888259	0.0903389	0.0705961	0.0814599	0.071216	0.0744319	0.130557	0.145098	0	0.138704	0.0940097	0.019761	0.152434	0	0.103941	0.0375701	0
NACC1	0.0175112	370	0.210747	0.0200665	0.0676551	0.0842005	0.0127789	0	0	0	0.156946	0.00846004	0.023465	0.00293099	0.00429483	0.0191149	0.0249005	0	0.0124602	0	0.00907446	0.00297587	0.00669008	0	0	0	0	0.0178058	0.0641068	0.0203457	0.0213789	0.00699213	0.0321753	0.0771764	0.0237573	0.00457565	0.0295272	0.0201593	0.00989041	0.0468236	0	0	0.0205686	0.00741607	0.0301619	0	0.119324	0.0359416	0
NACC2	0.0285599	289	0.352333	0.00793344	0	0	0.0324779	0	0.136559	0	0	0.00380306	0.00414831	0	0.0126536	0.0176184	0	0	0.0123513	0.0218144	0	0.00864127	0.0262579	0	0	0	0	0.030647	0	0	0.0198413	0.0130005	0.0258232	0.0296584	0.0589304	0.0128228	0.056499	0	0.0359125	0.0366142	0	0	0.0129554	0	0	0	0	0	0
NEDD4L	0.0786906	95	0.967627	0.00761474	0	0.0330752	0.0181174	0.111631	0	0	0	0.0229783	0.0339178	0.0114566	0.0149113	0.0162658	0	0.0130952	0.0145625	0.0235832	0.0263181	0.0216388	0.0205834	0.0264325	0.0981521	0	0.0907693	0.0487058	0.0409454	0.21563	0.0827656	0.0127013	0.0975337	0.143561	0	0.00858164	0.0303643	0.0408022	0.0439133	0.0239878	0.0548256	0.0804431	0.00982283	0.0235391	0.0335033	0	0	0.0750998	0
NEURL2	0.00449052	481	0.194353	0.0131867	0.0618247	0.0377646	0.0634569	0	0	0	0	0.00313903	0.0112288	0.00566736	0.0137114	0.0140119	0	0	0	0	0.0118452	0.0142617	0	0.0253758	0.0984179	0	0	0.00636727	0	0	0.0070088	0.0026941	0.00895217	0	0	0.00160851	0.00455518	0	0	0	0	0	0.0165576	0	0	0	0	0	0
NFX1	0.0510029	178	0.672458	0.0886808	0.122582	0.0369663	0.0877723	0.308847	0.164358	0.133547	0	0.03025	0.0402741	0.0249082	0.0348235	0.0230039	0.0571046	0.0372315	0.0260112	0	0.0215086	0.0428759	0.0341763	0.0218499	0	0	0	0.0578626	0.0378708	0.160758	0.0725687	0.0536897	0.0413857	0.0845596	0.0450805	0.0523679	0.0612885	0.070368	0.0644876	0.0727084	0.0652147	0.0269171	0.0128044	0.0564657	0.0508447	0	0	0	0
NFXL1	0.0168459	375	0.288754	0.035362	0.0661997	0	0.0267557	0.106438	0	0	0.172373	0.00570043	0.00571695	0.0152552	0.00457483	0.032146	0	0.0180824	0.0132384	0	0	0.0045161	0.00318135	0	0	0	0	0.013903	0	0.0345806	0.0207473	0.0224155	0.0116227	0.0202359	0.0238234	0.0248444	0.0173388	0.0178056	0.011518	0.0101708	0	0.0289244	0.0238045	0	0	0	0	0	0
NOSIP	0.145558	35	1.07512	0.0687178	0.057975	0.0540049	0.0366182	0.0998166	0	0.269271	0.175156	0.316718	0.279924	0.290885	0.295923	0.297092	0.243136	0.249689	0.294502	0.260196	0.238424	0.382124	0.15533	0.294655	0.57006	0.248389	0.404594	0.0773431	0.0542579	0	0.0458118	0.066338	0.0281507	0.0304538	0.024311	0.057301	0.109627	0.0885812	0.028596	0.0622321	0.0535926	0.111968	0.0459076	0.141791	0.229633	0	0.10654	0.439481	0
NSMCE1	0.142507	37	0.928302	0.0758279	0	0.120829	0.0498496	0.0998166	0.334972	0.109474	0	0.237925	0.109004	0.136542	0.141886	0.104356	0.0579397	0.163798	0.228607	0.102151	0.163247	0.240751	0.141511	0.0987095	0.172727	0	0	0.116259	0.0762682	0.0715004	0.0800102	0.157355	0.0645258	0.145376	0.120848	0.144078	0.126259	0.438778	0.0796172	0.275306	0.111376	0.117332	0.0692292	0.053378	0.250462	0	0	0.28994	0.5042
OSTM1	0.0708331	108	0.292261	0.0638939	0	0.0990348	0.114382	0	0	0	0	0.0735711	0.120159	0.0710851	0.0658508	0.10407	0.10842	0.137459	0.0734011	0.0515053	0.0384003	0.0372416	0.0726471	0.0828454	0	0	0	0.0916517	0.0979011	0.0508438	0.1726	0.0883722	0.179145	0.195488	0.119878	0.074025	0.110643	0.0911594	0.0549979	0.14037	0.11557	0.178865	0.0677998	0.0904731	0.0529869	0	0	0.0346341	0
OTUD7B	0.0296728	282	0.265282	0.0244476	0	0	0.00461755	0	0	0	0	0.00453136	0.00576338	0.00311988	0.00847627	0	0	0	0.0108268	0.0387722	0.0238326	0.00548792	0.0219852	0	0.11947	0	0	0.0469036	0.130392	0.0178958	0.0123852	0.0258448	0	0.0357391	0.027195	0.0361933	0.0166916	0.100461	0.0375588	0.0127124	0.0572667	0.0790695	0.0257896	0	0	0	0	0	0
PARK2	0.00464521	477	0.284387	0	0	0.0251587	0.00956284	0	0	0	0	0.00991186	0	0.00558193	0.00437243	0	0	0	0.0100825	0	0.0104571	0.013784	0	0	0	0	0	0.00697626	0	0	0	0.00313528	0.00751827	0	0	0.00632365	0.00453065	0	0.00713729	0.0103573	0	0	0	0	0	0	0	0	0
PATZ1	0.0249217	304	0.33888	0.0195988	0	0	0.0413375	0	0	0.116363	0	0.00456324	0.00478657	0.00802053	0.00528643	0.0121085	0	0	0	0.00774309	0.0242406	0.00975132	0.0124453	0	0	0	0	0.0445809	0	0.0154752	0.0228919	0.0350109	0.014704	0.0303015	0.00864579	0.0246651	0.0440503	0.0547101	0.0307171	0.0114163	0	0	0.0527675	0	0	0	0	0	0
PCGF1	0.0654046	128	0.550092	0.0487549	0	0.0598076	0.0359206	0	0	0	0	0.0931197	0.124097	0.0538791	0.0668216	0.0709572	0.0982112	0.0780757	0.0929088	0.0644603	0.0618846	0.0643144	0.0395109	0.0443479	0	0	0	0.0557888	0	0.0662618	0.0519956	0.0612616	0.0684529	0.089353	0.0416453	0.0834482	0.0520601	0.0796836	0.102172	0.051537	0	0.0781668	0.0989592	0.0572757	0.0301619	0.159502	0	0.0273883	0.453179
PCGF3	0.0509094	179	0.751345	0.0962005	0.123973	0	0.14253	0.0960918	0	0	0.158467	0.0920354	0.0470846	0.0556041	0.0737674	0.0571307	0.0299014	0.0477524	0.0390773	0.0866814	0.0374129	0.0518611	0.0455787	0.0165031	0.0878868	0	0.219489	0.113092	0	0.081746	0.0699439	0.0528836	0.115791	0.073738	0.0598164	0.0469816	0.0781812	0.0982013	0.0457151	0.0578092	0.131516	0.0578455	0.0468863	0.0497363	0.0352687	0	0	0.134232	0
PCGF5	0.134635	42	0.730512	0.0832562	0.133235	0.0395926	0.0972583	0.203702	0.13854	0	0	0.150084	0.111037	0.149282	0.0837333	0.135336	0	0.0826178	0.0442099	0.0575904	0.0475894	0.0901042	0.0685279	0.071107	0	0	0.0976626	0.181863	0.0466738	0.214976	0.208957	0.112861	0.377547	0.265676	0.257094	0.127513	0.126513	0.31358	0.245994	0.382044	0.108274	0.38296	0.276892	0.053661	0.055685	0.141733	0.0587293	0.0737584	0
PCGF6	0.0220244	329	0.254188	0.0542186	0	0	0	0	0	0	0	0.0157685	0.0133155	0.0168496	0.0344815	0.0128016	0	0.0309394	0.00704022	0.0342416	0.0117728	0.0165335	0.023667	0.0206131	0.0925276	0	0.106774	0.0499285	0.0687915	0.0343415	0.019616	0.0309419	0.00795875	0.0110813	0.0597575	0.0335211	0.0335074	0.0320483	0.0389392	0.0125916	0.0767867	0	0.0476147	0.0199232	0	0	0	0	0
PEX10	0.0215386	335	0.372968	0.0301393	0	0	0.028379	0	0.146421	0	0	0.0622315	0.0288871	0.0420094	0.0395669	0.05349	0.0637817	0.0711418	0.0521221	0	0.00920909	0.0549897	0.0252775	0	0	0	0.102788	0.0107458	0	0.021441	0.0164007	0.0249832	0.0299191	0.0298094	0.0511336	0.013881	0.00969737	0.0251547	0.00936218	0.0124031	0.0678191	0	0.0129798	0.0269197	0	0.159502	0	0	0
PEX12	0.0142052	397	0.351363	0.022158	0.0619783	0	0.00494113	0	0	0	0	0.00944791	0.00778953	0.00543907	0.00465653	0	0	0	0.0143497	0	0.0185154	0.0196232	0.00555167	0	0	0	0	0.0322102	0.066219	0	0.00699597	0.0239577	0.00592852	0.0223228	0	0.017063	0.0381248	0.0208899	0.0222147	0	0	0	0.033555	0	0	0	0	0	0
PEX2	0.0917412	71	0.4696	0.117038	0.12052	0.0592689	0.096447	0.0966272	0.142077	0	0.29943	0.139292	0.0799056	0.0703384	0.0645681	0.0539126	0.0643257	0.0863943	0.117848	0.0480262	0.121288	0.14267	0.0886287	0.088181	0.204279	0	0	0.0373946	0.0726222	0.0511252	0.093204	0.0759559	0.0452157	0.0549352	0.0917658	0.102207	0.095223	0.0384228	0.0346747	0.055621	0.0722182	0.052734	0.131372	0.0745313	0.0349304	0	0	0.117257	0.185577
PHF7	0.00825324	436	0.315602	0.015801	0.0696324	0	0.0142016	0	0	0	0	0.0281561	0.00635966	0.00516164	0.0131527	0.00627347	0.0292863	0.0311847	0.0161822	0	0.00900328	0.00551333	0.00332851	0	0	0	0	0.00391524	0	0	0.00746299	0.00990269	0	0.0110224	0	0.00182708	0	0.0173833	0	0	0	0	0	0	0	0	0	0	0
PHRF1	0.0194158	355	0.383965	0.0283148	0	0.065767	0.0298787	0	0	0	0	0.0257551	0.0317498	0.0333326	0.0207382	0.0227268	0.0299014	0	0.0178541	0.0068257	0.0105438	0.0118248	0.0165817	0	0	0	0	0.0219632	0.117377	0	0.0275793	0.0149224	0.0145201	0.0312761	0	0.0142305	0.0154798	0	0.0104231	0	0.123202	0	0	0.00757975	0	0	0.094556	0.0232099	0
PJA1	0.0359785	243	0.347043	0.0384216	0.0651202	0	0.00487734	0	0	0	0	0.038964	0.0244137	0.0298462	0.00396815	0.00541352	0	0.0375435	0.0445284	0	0.0588003	0.0464347	0.0144741	0.0688189	0.0930203	0	0	0.0230481	0.0517958	0.0256139	0.0285731	0.0298385	0.0159448	0.0325299	0.0286214	0.0356639	0.0340492	0.0401894	0.025418	0.0341558	0	0.0291643	0.0438922	0.00672557	0	0.159502	0	0	0
PJA2	0.189513	22	1.36535	0.205335	0.167692	0.313877	0.269661	0.299281	0.251418	0	0.475885	0.0732418	0.0842904	0.0654883	0.0399075	0.0577594	0.147681	0.0289673	0.0701067	0.150225	0.044769	0.0603294	0.10984	0.0612271	0.101147	0	0.209562	0.229657	0.0951341	0.303136	0.26726	0.323658	0.303183	0.323829	0.450991	0.267903	0.298693	0.272364	0.15676	0.334465	0.259512	0.217556	0.282316	0.0283279	0.0231937	0.169307	0.27275	0.0647387	0
PML	0.0557516	159	0.634908	0.088927	0.0661997	0.179175	0.0909476	0	0	0	0	0.0648048	0.0396829	0.0336763	0.100867	0.0364254	0.0305067	0.0183802	0.0211919	0.334239	0.0115092	0.022609	0.140961	0.0572965	0.172036	0	0	0.177626	0.145344	0.0193833	0.0504637	0.0663273	0.0762414	0.106751	0.0668164	0.0855719	0.201667	0.0841402	0.0487967	0.140217	0	0	0.0587365	0.015618	0.0248124	0	0	0.060849	0
PPIL2	0.0293336	285	0.355433	0.0442098	0.129139	0.11459	0.035141	0	0	0	0.172373	0.0292536	0.0376464	0.0267255	0.00448311	0.00949125	0.0339163	0.0139723	0.0311092	0.0391287	0.0331974	0.0412735	0.0246045	0	0	0.300909	0	0.0105672	0.227039	0.0422977	0.0207957	0.0448493	0.0297668	0.0509814	0.0160027	0.0280091	0.0391351	0.0402623	0	0.0432249	0	0	0.00968001	0.0423871	0	0	0	0.0304662	0
PRPF19	0.0888582	75	0.773634	0.0863196	0.111187	0.101496	0.0360351	0	0	0	0	0.134381	0.0881096	0.100343	0.0787607	0.0715655	0.0312697	0.0448042	0.0894592	0.0963443	0.0761988	0.0697817	0.0454726	0.0848623	0.075948	0.29999	0.104791	0.124485	0.0806845	0.0174892	0.05407	0.0470199	0.0289376	0.103696	0.0411075	0.0566622	0.0802015	0.113915	0.0925645	0.0317645	0	0.0594017	0.0230812	0.0213184	0.0337955	0	0.0749015	0.0884726	0.185577
RAB40B	0.0620341	138	0.710435	0.00763042	0	0.0246546	0.0188894	0	0	0	0	0.0362106	0.00785952	0.0156949	0.0169633	0.00693871	0.0332718	0	0.0196106	0.0347533	0.0326309	0.0318317	0.020341	0.0499022	0	0	0	0.0157475	0.110781	0.0559203	0.00780313	0.0399985	0	0.0215973	0.0272493	0.0240277	0.0210775	0.0375619	0.0301463	0.0339277	0.187993	0.106022	0.0224786	0.0146937	0.0266448	0	0.0587293	0.136017	0
RABGEF1	0.0218903	330	0.302968	0.0562433	0	0.0258554	0.014391	0.0960918	0	0	0	0.0101075	0.0218037	0.0224697	0.0113266	0.0137415	0	0.0331652	0.0105077	0.0249695	0.0119735	0.017197	0.00317138	0	0	0	0	0.0140586	0	0.0177212	0.0433947	0.0190545	0.035239	0.0329685	0	0.0145835	0.0280321	0	0.0251967	0.026481	0.0537927	0.0301289	0	0	0	0	0	0	0
RAD18	0.0120222	413	0.491252	0.0256716	0	0.0904217	0.0227503	0	0	0	0	0.00676591	0.00779524	0.0116139	0.0128695	0	0.0299518	0	0.0211758	0	0.015514	0.0139128	0.00643652	0.0258655	0	0	0	0.0155734	0	0.0340816	0.010629	0.00674071	0	0.0213845	0.0294515	0.0169263	0.0174803	0	0.0102504	0.00881847	0	0.0290436	0	0	0	0	0	0	0
RBBP6	0.240883	15	0.963005	0.172046	0.451346	0.141948	0.30116	0.107656	0.527002	0.512866	0.156946	0.212967	0.125477	0.143843	0.401204	0.131909	0.0470117	0.062579	0.164386	0.276942	0.199976	0.207097	0.368845	0.142189	0.0888693	0.248389	0.100377	0.292135	0.0762682	0.080543	0.205459	0.145099	0.173742	0.123011	0.289152	0.28107	0.284745	0.224032	0.48489	0.196626	0.24679	0.169625	0.171251	0.0395133	0.0659751	0.35176	0	0.0335257	0
RBCK1	0.0904297	74	0.83721	0.0798512	0	0.0730812	0.122648	0.108523	0	0	0.130949	0.104124	0.0676651	0.0535714	0.121171	0.0351809	0.120952	0.0592467	0.0744569	0.142997	0.116533	0.0874664	0.103424	0.0351107	0.176526	0	0.124401	0.0906909	0.0608615	0.0160778	0.0819417	0.107201	0.048184	0.128123	0.0894761	0.0934905	0.106947	0.0989419	0.0585877	0.183567	0.370329	0.0349913	0.159463	0.0857003	0.0545598	0.177155	0.108752	0.0543902	0
RBX1	0.602728	1	1.64727	0.482999	0.255059	0.584713	0.260476	0.295824	0.397729	0	0	0.640193	0.647777	0.595015	0.498489	0.47906	0.68013	0.443049	0.658991	0.47526	0.71975	0.76249	0.41262	0.474273	1.01071	1.36529	0.814601	0.472486	0.399839	0.210435	0.441027	0.453958	0.414218	0.639049	0.432707	0.379818	0.556739	0.619649	0.354521	0.608985	0.586642	0.556218	0.404717	0.245604	0.275898	0.320422	0.873756	0.455965	0.211773
RC3H1	0.058416	148	0.562116	0.12503	0.182468	0.103877	0.140596	0	0.278676	0.131959	0.175156	0.018488	0.0265089	0.0237435	0.0186586	0.0327064	0.0335639	0.034058	0.0152231	0	0.00861392	0.0127258	0.0333341	0.0245665	0	0	0	0.115698	0.297753	0.0902974	0.162464	0.10432	0.129432	0.138922	0.105043	0.105373	0.155814	0.181919	0.122802	0.0352703	0.056792	0.0503752	0.118627	0	0	0	0	0.0761774	0
RC3H2	0.0606223	141	0.668177	0.0898764	0	0.089623	0.109713	0.0998166	0.146421	0.13441	0	0.00415081	0.0133277	0.0346195	0.036223	0.0318391	0	0	0.0169207	0.0462533	0.0287379	0.0198739	0.0877568	0	0.322022	0	0	0.164584	0.264374	0.0642334	0.100121	0.0983338	0.123423	0.0962657	0.109479	0.0802182	0.113492	0.0578885	0.0441627	0.105312	0.0649584	0.152545	0.0468277	0.0124959	0.0680104	0	0	0.035032	0
RCBTB1	0.0331859	257	0.491252	0.0158749	0	0.109659	0.0761197	0.19109	0.143473	0	0	0.0219083	0.011678	0.0142327	0.033494	0.0171026	0.0329651	0	0.0306005	0.0398432	0.0219995	0.0274892	0.0501859	0.019092	0	0	0	0.0397601	0.101573	0.0186238	0.0383649	0.0318701	0.00717782	0.0326929	0.101523	0.0188931	0.0853326	0	0.00986549	0.0342358	0.074137	0	0.011007	0.0134637	0	0	0	0	0
RCBTB2	0.0516463	171	0.432312	0.0592744	0.124247	0.0366429	0.101569	0.0985805	0.127471	0	0.172244	0.022471	0.025787	0.0344683	0.057546	0.0176666	0	0.0325949	0.0158597	0.0476363	0.0100295	0.0263953	0.0912982	0.0495056	0	0	0.102574	0.0734458	0	0.0368212	0.0726381	0.0577677	0.0598409	0.103474	0.108039	0.0508604	0.068407	0.0336078	0.0736567	0.0512715	0	0.0528543	0.0577065	0.0221593	0	0	0.121019	0.0934251	0
RCHY1	0.0812617	87	0.71423	0.0136916	0.117438	0.0736514	0.0607418	0.10958	0.135025	0	0	0.0685895	0.0694312	0.0558916	0.0683841	0.0313586	0.0790701	0.0312061	0.0988467	0.0917022	0.0588739	0.0842459	0.0822979	0.118514	0	0.286113	0.191147	0.116651	0	0.0512336	0.0682181	0.0612757	0.0726227	0.0907143	0.078566	0.0921012	0.106992	0.137224	0.0610199	0.0661037	0	0.0307768	0.12513	0.0198099	0.0574165	0	0.0587293	0.140989	0
RFFL	0.0423804	218	0.358127	0.0146748	0.0634623	0.0842676	0.0461941	0	0.101738	0.116363	0.158467	0.00510016	0.012895	0.0179076	0.0098606	0.0493346	0	0.027416	0.00498618	0.0107483	0.0136154	0.00609687	0.00983123	0	0	0.300909	0	0.0251358	0.0608615	0.019831	0.0671485	0.0225429	0.0977602	0.117622	0.02532	0.0242057	0.00427767	0.0225658	0.0275436	0.0500674	0.0608952	0.0850442	0.0868839	0.0127731	0.0339103	0	0	0.0460161	0
RFWD2	0.0417149	219	0.357982	0.0341111	0.120211	0.237141	0.0465395	0	0.141761	0.116144	0	0.00420971	0.0364332	0.0240776	0.0175671	0.0582979	0.0333198	0	0.00765026	0.0255447	0	0.0106176	0.0345449	0.0254123	0	0	0	0.047406	0.0811012	0.052646	0.0697798	0.042732	0.140961	0.0314146	0.0318573	0.0459592	0.0449828	0.0586262	0.0518066	0.0365261	0.0652147	0.176358	0.0369671	0.00714151	0	0.141733	0	0.129053	0
RFWD3	0.0199758	352	0.35247	0.0499259	0	0.0364199	0.0182744	0.0949978	0	0.125825	0	0.00822345	0.0154575	0.0148436	0.00521682	0.00612208	0.033789	0.0133763	0.00957503	0	0	0.00239912	0.0169139	0.0430049	0.0696838	0	0.104791	0.0271961	0.0645186	0.0165764	0.0213464	0.0142862	0.0539163	0.0567804	0	0.0210119	0.05437	0	0.0450216	0	0	0.0313348	0	0	0	0	0	0	0
RHOBTB1	0.0138807	400	0.362004	0.0367537	0.0601448	0.0703347	0.118412	0	0.145034	0.273969	0	0.0160209	0.0173214	0.00933757	0.00959577	0	0	0	0.0102294	0.0134628	0.0199866	0.0119116	0.0195399	0	0	0	0.0900652	0.0248493	0	0	0.0244728	0.0106822	0	0.0462866	0.0631455	0.0165646	0.0227056	0.0394819	0.00934533	0	0	0	0	0	0	0	0	0	0
RHOBTB2	0.00791665	442	0.171273	0.0203723	0	0	0.00456694	0	0	0	0	0	0.00267193	0.00320132	0	0	0	0.014978	0.0052903	0.0222133	0	0.00255171	0.00326077	0	0	0	0	0.0087382	0	0	0.00317655	0.00450072	0.00783716	0.0130859	0.015659	0.0101473	0.00276885	0	0	0	0.0716437	0	0.0135593	0	0	0	0	0	0
RHOBTB3	0.195962	21	1.05084	0.202533	0.24222	0.118267	0.0832956	0	0.101738	0	0.158467	0.0535714	0.0418524	0.0315084	0.0416969	0.0256835	0.0334167	0.0280686	0.140099	0.00895585	0.110094	0.166296	0.0615811	0.0238536	0	0	0.198645	0.108409	0.376521	0.0895221	0.202341	0.542902	0.138141	0.105428	0.212139	0.607476	0.127402	0.307235	0.669708	0.0946574	0.333966	0.510886	0.267675	0.0135178	0	0	0	0.195371	0
RING1	0.0458927	198	0.611349	0.0723821	0.0604262	0.0923792	0.0820238	0.105122	0	0.131959	0.302175	0.0791605	0.0424178	0.0416689	0.0548802	0.0319685	0.0932482	0.0692592	0.0418886	0.0556511	0.0496497	0.0388867	0.0231055	0.061731	0	0	0	0.0603394	0.0637021	0.0171343	0.0445045	0.0428277	0.0399059	0.0977713	0.0566397	0.0468029	0.065757	0.0150604	0.0553697	0.039036	0	0.0307449	0.0435228	0.0154646	0.0229854	0	0	0	0
RNF10	0.147644	30	0.857023	0.108497	0.266589	0.13611	0.155437	0.221634	0	0	0.162707	0.220691	0.191092	0.175208	0.208525	0.229714	0.15809	0.121189	0.0982919	0.150866	0.152766	0.137995	0.160517	0.11201	0.075948	0	0.102788	0.255156	0.225199	0.104935	0.200639	0.116891	0.352634	0.18577	0.234967	0.131667	0.200982	0.114896	0.328794	0.24346	0	0.248788	0.236487	0.0469655	0.0761061	0.192025	0.173694	0.054529	0
RNF103	0.119913	49	0.841679	0.0502655	0	0.0364383	0.11216	0.281721	0.123578	0.121205	0.158467	0.0189537	0.0238569	0.023286	0.0543991	0.0123945	0	0.01437	0.0122086	0.0487801	0	0.0242607	0.0779033	0.0186077	0	0	0	0.183725	0.227795	0.184558	0.104902	0.127306	0.0861357	0.188776	0.105402	0.178283	0.124325	0.478772	0.292624	0.0828287	0.252739	0.323139	0.227789	0.0599856	0.103402	0	0	0.0583095	0
RNF11	0.23576	16	0.999023	0.116429	0.0645806	0.0807997	0.142444	0.0998166	0.13854	0	0	0.174245	0.137655	0.156984	0.213678	0.146165	0.156381	0.0807601	0.185031	0.230417	0.163731	0.156219	0.332048	0.205982	0	0.239393	0.298839	0.627865	0.563367	0.315566	0.353843	0.39382	0.488597	0.421688	0.356442	0.434986	0.399151	0.510274	0.596904	0.700979	0.257344	0.387715	0.29341	0.0535543	0.0649568	0	0	0.0517974	0
RNF111	0.0405579	225	0.236224	0.0247251	0.0553542	0.0890082	0.0508536	0	0	0	0	0.00977455	0.0397585	0.0198936	0.0326183	0.0354038	0	0.0335396	0.01084	0.0417663	0.0229953	0.020308	0.0362594	0.0236214	0	0	0	0.0788811	0.0811012	0.014251	0.0821586	0.0452761	0.0778634	0.0959407	0.0198301	0.0401608	0.0518512	0.0613227	0.0389875	0.0344868	0	0.0952522	0.0213805	0.0224414	0.0617735	0	0	0	0
RNF113A	0.0629008	134	0.634908	0.0423994	0	0.030656	0.0432193	0	0	0	0	0.0471563	0.0708045	0.0917812	0.0622435	0.0185345	0.109521	0.104616	0.0548969	0.0545024	0.0528461	0.0588357	0.0564065	0.0966524	0	0	0	0.0329763	0	0.0708927	0.0220639	0.0291186	0.0306767	0.0200651	0.0131606	0.0257506	0.0464125	0.0513941	0.0295369	0.0327965	0.063336	0.0307449	0.081438	0.137184	0.163193	0	0.179748	0.0733852	0
RNF114	0.185226	24	0.887761	0.18436	0.256079	0.0638601	0.139538	0.100119	0.127471	0.38432	0	0.196424	0.231267	0.181206	0.243071	0.11812	0.0881411	0.146288	0.0931814	0.1301	0.258217	0.134337	0.170151	0.0610764	0.0735513	0	0	0.210872	0.0687915	0.289375	0.184897	0.0913815	0.233455	0.264489	0.185605	0.148106	0.152253	0.185945	0.242102	0.170863	0	0.18549	0.176075	0.136486	0.24724	0	0	0.0963777	0.213961
RNF115	0.0790365	94	0.634908	0.0822138	0.132947	0.11674	0.0938795	0	0	0	0.490833	0.0478588	0.0597581	0.126791	0.0574801	0.0396108	0.0577363	0.0787792	0.0345121	0.158661	0.0440274	0.0502036	0.097534	0.0387273	0.0977579	0.268386	0.101182	0.214926	0.150274	0.0154752	0.125839	0.152415	0.12675	0.105013	0.251951	0.226835	0.316537	0.176849	0.180899	0.144443	0.182296	0.199103	0.222313	0.0433116	0.0347279	0	0	0.0290834	0
RNF121	0.0318137	266	0.256073	0.0149498	0	0	0.0139432	0	0	0	0	0.0277627	0.0485786	0.036912	0.028172	0.0237735	0.0287985	0.016377	0.0244723	0.00882915	0.012388	0.0307924	0.0194214	0.0250725	0	0	0	0.0174483	0	0	0.0195338	0.0354661	0.0349815	0.0161645	0.0279102	0.0223403	0.0153454	0.0163711	0.0178269	0.0740371	0	0	0.0323893	0	0	0	0	0	0
RNF122	0.0201083	351	0.345824	0.037274	0	0	0.0518236	0	0	0.144977	0	0.0241314	0.00331416	0.00918136	0.0295818	0.019866	0	0	0.00801175	0.0120295	0.0103506	0.0229679	0.0847431	0.0713324	0	0	0	0.0722609	0.0608615	0.119977	0.046021	0.0303346	0.027581	0.0337695	0.0536839	0.0870448	0.0929685	0.0170013	0.0857495	0.0838888	0.0568133	0.0245695	0.0135593	0	0	0	0	0	0
RNF123	0.012777	407	0.277072	0.00764622	0	0.0328847	0.0135088	0	0	0	0	0.00518522	0.0134977	0.00827963	0.0269832	0.0202974	0.0331054	0	0.00877609	0	0.0246864	0.0125265	0.0180128	0	0	0.26653	0	0.00607245	0.0973889	0	0.0132785	0.00715121	0	0.0115835	0.0123449	0.0163163	0.0180061	0.0330617	0.00774496	0.00955265	0	0	0	0.0170854	0.0356463	0	0.0999757	0	0
RNF125	0.0323688	261	0.599966	0.0513949	0.209012	0.187173	0.0701306	0.108523	0	0.116363	0.149594	0.0137059	0.0109055	0.0485516	0.0234707	0.00706206	0	0	0.0028448	0.111224	0.0198466	0	0.0370108	0	0	0	0	0.186434	0	0.0348492	0.029318	0.0259593	0.0209273	0.0354465	0.0412589	0.0220972	0.349098	0.0417976	0.0182507	0.0195645	0.0535926	0.0316263	0.0885288	0	0.104285	0	0	0	0
RNF126	0.0490402	188	0.487748	0.0146632	0	0.0335662	0.0398252	0.0947939	0	0	0	0.0619162	0.0826516	0.077263	0.0376405	0.0309519	0.0540598	0.0674972	0.0445461	0.0241258	0.0300634	0.0402746	0.0312505	0	0.152096	0	0	0.0626231	0.264916	0.0355832	0.0121624	0.0112511	0.030837	0.0828006	0	0.0127475	0.0327451	0.0195894	0.034024	0	0	0.0329662	0.0392981	0.0564981	0	0	0	0.0811472	0.2148
RNF128	0.0203994	347	0.656836	0	0	0.274844	0	0	0	0	0	0.0632956	0.01816	0.0262933	0.024448	0.0126151	0.0523973	0.0512805	0.0567537	0.0123171	0.0437902	0.0778012	0.00332384	0.0658042	0	0	0	0	0.0378708	0	0	0	0	0.00996979	0	0	0.0031636	0	0	0	0.0544815	0	0	0.00678978	0.0632815	0	0	0.0844477	0
RNF13	0.207532	17	1.18356	0.164438	0.30498	0.417679	0.378304	0.405877	0	0.131959	0.617222	0.162344	0.35949	0.127187	0.182038	0.333089	0.106668	0.338767	0.0949838	0.159678	0.0596939	0.162824	0.165876	0.102983	0	0.267144	0.206423	0.127548	0.318574	0.0937366	0.407049	0.276737	0.345892	0.50216	0.111333	0.17859	0.229393	0.32043	0.144342	0.127731	0.182769	0.0264207	0.138607	0.0847973	0.0694981	0.192025	0	0.105132	0
RNF130	0.257944	14	1.21277	0.402164	0.593499	0.910523	0.713224	0.742194	0.257122	0.830144	0.484835	0.138618	0.813464	0.170668	0.177991	0.520247	0.27186	0.452632	0.0797692	0.167924	0.0587488	0.10092	0.204589	0.136981	0.277423	0.286113	0.0970066	0.147759	0.147718	0.0919318	0.667033	0.214691	0.626495	1.03361	0.148399	0.195076	0.226888	0.438125	0.117916	0.195672	0.0601759	0.148752	0.189472	0	0.098896	0	0.478528	0.161059	0
RNF135	0.0298506	278	0.357934	0.103528	0.223558	0.145951	0.184856	0	0.278756	0	0	0.026571	0.0503879	0.0238977	0.0584382	0	0	0.0158325	0.0254742	0.080268	0	0.0271421	0.0405472	0.0743439	0.148998	0	0	0.019356	0.0642433	0.0164883	0.0363995	0.0278189	0.0203664	0.0828456	0.0128808	0.0360605	0.0292179	0.0324919	0.00825877	0.0132339	0.0564748	0.0262808	0.0118203	0.0220009	0.0301619	0	0	0.14412	0
RNF138	0.102598	58	0.479879	0.0557791	0.0645806	0.126155	0.147062	0	0.262056	0	0.168772	0.103726	0.0416134	0.0731182	0.0953988	0.0250136	0	0	0.0201355	0.0991596	0.0315822	0.0359705	0.0970357	0	0	0	0.195861	0.277248	0.162105	0.0738602	0.136386	0.096418	0.0757951	0.112273	0.0914911	0.124722	0.188776	0.159785	0.161106	0.0626196	0.0548256	0.11224	0.164132	0.0203634	0.0321795	0	0	0.0241222	0
RNF139	0.0794508	92	0.434051	0.0760341	0.168149	0.075204	0.0682573	0	0	0.136193	0	0.0415956	0.0269435	0.0431598	0.0281546	0.0390491	0.0656999	0	0.0288994	0.0467405	0.0533307	0.0309244	0.0394282	0	0.138882	0	0	0.104041	0.192929	0.0960747	0.103905	0.102745	0.0947294	0.0713369	0.140696	0.112788	0.108606	0.175826	0.287369	0.0995772	0.0776885	0.0885843	0.180656	0.0151736	0	0	0	0	0
RNF14	0.0558383	158	0.538177	0.0149868	0	0	0.0508757	0.104555	0.398154	0.278203	0.163774	0.115302	0.0385669	0.041286	0.0466268	0.0129127	0.0305067	0.0523629	0.0910126	0.0130409	0.0743497	0.111305	0.0446159	0.0841699	0	0	0.203067	0.0480548	0.16485	0.0885934	0.0749732	0.0629783	0.0590439	0.0892464	0.120338	0.070819	0.0421904	0.0350533	0.0298187	0.124401	0.268184	0.0278554	0.0608476	0.03758	0.111823	0	0.103941	0	0
RNF141	0.100605	61	0.937275	0.0797347	0.210923	0.109997	0.139484	0.104555	0.556561	0	0.151808	0.0916188	0.084292	0.0714022	0.0746322	0.106476	0.140603	0.0954731	0.113751	0.0852611	0.135366	0.143041	0.0650435	0.0832297	0.103043	0	0.192853	0.0427262	0.317617	0.0389695	0.0981521	0.0454203	0.0509703	0.0575908	0.0578909	0.0481233	0.0974601	0.0642637	0.0590787	0.157977	0	0.0560945	0.0553559	0.0329153	0.0651918	0	0.187691	0.0229299	0
RNF144A	0.0343907	250	0.660967	0.00660658	0	0	0.00935411	0	0	0	0	0.0569007	0.0115705	0.0151746	0.0151371	0.00611575	0	0	0.0517747	0.0372834	0.0307306	0.0466804	0.106283	0.0420168	0.182243	0	0	0.0359184	0	0	0.017656	0.0509417	0.0145424	0.0311976	0.0499121	0.115976	0.0640606	0.0414484	0.0183325	0.0215753	0.0521128	0	0.0244379	0	0	0	0	0	0
RNF144B	0.0439206	209	0.703953	0.0888713	0.126945	0.26694	0.319719	0.320572	0.127471	0.2683	0.304363	0.0392073	0.164251	0.0741512	0.034949	0.155497	0	0.315437	0	0.0424253	0	0.00180734	0.024928	0	0	0	0	0.0411951	0.0732205	0.268405	0.402011	0.0344412	0.564294	0.408474	0.0483078	0.0207752	0.0354102	0.0776707	0	0.0223357	0.122478	0.118049	0.0692416	0	0	0	0	0	0
RNF145	0.204565	19	1.18899	0.123553	0.229315	0.133166	0.217521	0.104555	0	0.116144	0.130949	0.291284	0.518644	0.391445	0.357277	0.439228	0.327705	0.301863	0.19127	0.225332	0.288468	0.25344	0.270843	0.227255	0.307605	0.327719	0.596676	0.271681	0.558649	0.0866071	0.354737	0.130839	0.724417	0.495396	0.127977	0.143176	0.180405	0.295776	0.198085	0.226884	0.120828	0.283856	0.266491	0.114103	0.339816	0	0	0.119589	0.515509
RNF146	0.0907021	73	0.503939	0.160728	0.248966	0.120436	0.0699948	0.336097	0	0	0.155563	0.062119	0.0363872	0.0410533	0.0442541	0.0447354	0.0760627	0.0331286	0.0425293	0.0256682	0.0341112	0.079132	0.0560319	0.0743596	0.0802009	0	0	0.0951516	0.0542579	0.0759888	0.105621	0.174865	0.0812568	0.0780466	0.131007	0.194076	0.117147	0.0560911	0.0878513	0.10651	0.122599	0.175253	0.164553	0.0320938	0.0565888	0	0	0.068204	0
RNF149	0.198959	20	1.99395	0.197108	0.311104	0.185834	0.375371	0.432876	0.127471	0.528762	0.54895	0.135037	0.318699	0.369947	0.183747	0.273838	0.207679	0.554809	0.0515373	0.0860756	0.0862815	0.0632114	0.0669436	0.0471748	0	0	0.0956809	0.316859	0.470618	0.518279	0.32157	0.155996	0.460717	0.411893	0.102795	0.157427	0.149921	0.343124	0.441194	0.206502	0.191668	0.474041	0.206808	0.0541712	0.266	0.192025	0.094556	0.021894	0
RNF150	0.0168232	376	0.489482	0.007594	0	0	0.0349977	0.106662	0	0.129806	0	0.0143246	0	0	0.00923307	0	0.0316456	0	0.0324064	0.0218415	0	0.015888	0.0106625	0	0	0	0	0.00193534	0	0	0.013265	0.00718375	0	0.0309329	0.111525	0.0375653	0.0038341	0.0178056	0.0210848	0.0192318	0.0572667	0	0.0105488	0	0	0	0	0	0
RNF166	0.0501372	183	1.18496	0.0664904	0	0.0592367	0.137308	0.104625	0	0.133547	0.168772	0.045323	0.0264406	0.130438	0.035348	0.035574	0.0324898	0.0334733	0.00496187	0.0355958	0.0117924	0.0133795	0.0164246	0	0	0	0	0.0122674	0	0	0.0434563	0.0170972	0.0129213	0.0188912	0.0103878	0.0151459	0.00705764	0	0	0.0111176	0.0601759	0.0262808	0.0832941	0.0230597	0.151529	0	0.094556	0.0391394	0
RNF167	0.155831	28	1.36535	0.119137	0.182779	0.150387	0.122547	0	0.404175	0.116363	0.160038	0.203294	0.166228	0.251495	0.131903	0.112614	0.286933	0.0850271	0.171025	0.144974	0.201171	0.211353	0.140072	0.200509	0.238014	0	0.097844	0.11285	0.29563	0.147297	0.0930078	0.108447	0.0946984	0.0628325	0.170972	0.0755462	0.102026	0.0959904	0.0656608	0.0945991	0.272718	0.0258169	0.111527	0.104957	0.162699	0	0.133631	0.110731	0.185577
RNF168	0.0406463	224	0.692895	0.00757346	0.09792	0.0420443	0.0454881	0	0	0	0	0.0129162	0.0187286	0.0369612	0.0358113	0.00476338	0	0	0.0339333	0.0895808	0.077374	0.0243051	0.0541571	0.0478041	0	0	0	0.0774121	0.359507	0.0315502	0.0599605	0.0402823	0.0495288	0.078658	0.0265885	0.0377984	0.0567439	0.0830601	0.0819622	0.0401811	0.105165	0	0.0818958	0.0208982	0.0321795	0.141733	0	0.0464406	0
RNF169	0.0222677	325	0.179874	0.00653579	0.0645806	0.034307	0.0218864	0	0	0.116144	0.155563	0	0.0161238	0.00888271	0.00995466	0.0242644	0	0	0	0.0254224	0.0133378	0.00719339	0.0125507	0	0	0	0	0.0802895	0	0.0318554	0.0370453	0.0254554	0.057006	0.0313545	0.0271929	0.0427514	0.0753361	0.0150604	0.026694	0.045494	0	0	0	0.0230767	0	0	0	0	0
RNF170	0.0567803	155	0.448323	0.0467486	0	0.0761896	0.0461769	0	0.267589	0	0	0.0488993	0.0165615	0.0231766	0.0201977	0.0145008	0.0892147	0	0.0611362	0.0211958	0.0815443	0.0661121	0.07495	0.0681721	0	0	0.0907693	0.0303268	0.0811012	0.020057	0.0308959	0.0747925	0.00455841	0.0399347	0.0656682	0.0595951	0.0607477	0.0820725	0.0102842	0.0213652	0.0601759	0.103769	0.0609496	0.0176824	0	0	0	0.0229299	0
RNF181	0.389595	8	1.18794	0.229252	0.325624	0.293344	0.147628	0.214135	0	0	0	0.547315	0.553803	0.451459	0.349965	0.434583	0.402915	0.417424	0.495506	0.298906	0.407209	0.49664	0.291862	0.125077	0.456345	0	0.72346	0.246348	0.527439	0.353801	0.356147	0.302693	0.25279	0.446211	0.155012	0.326384	0.192641	0.235885	0.31242	0.356756	0.170406	0.394879	0.424543	0.348103	0.307018	0.485645	0	0.410858	0.164458
RNF185	0.0487591	190	0.396726	0.0270538	0	0.034307	0.0497496	0	0	0	0	0.0401242	0.0608205	0.0662942	0.0374931	0.106085	0.0543074	0.0756105	0.0286889	0.0630135	0.0102686	0.0298453	0.017819	0.0181825	0	0	0.100777	0.036806	0.0608615	0.0701387	0.0691905	0.0631004	0.0681218	0.0456311	0.0560209	0.0681053	0.0386863	0.0633383	0.0896689	0.0254029	0.0544815	0.112602	0.0799273	0.0204514	0	0	0.0587293	0.0666311	0
RNF187	0.0704692	110	0.935633	0.0978548	0.117368	0.230466	0.165478	0.195785	0	0	0	0.0629199	0.0546885	0.0352301	0.0424625	0.0322336	0.0324898	0.035369	0.0950316	0.0937867	0.0693977	0.0336348	0.120665	0.0346194	0	0	0.0970066	0.0740285	0.194019	0.0500158	0.0900963	0.115131	0.0619583	0.162867	0.114045	0.111593	0.113865	0.061714	0.0527704	0.106604	0.241697	0.0647398	0.0803115	0.0149506	0.0724635	0	0.123578	0.0288675	0
RNF19A	0.0775738	99	0.549918	0.0621581	0	0.163563	0.0413837	0.10958	0.143039	0	0	0.0182503	0.0264046	0.100114	0.0216541	0.0319983	0.027895	0.0508282	0.0160344	0.0612697	0.0668266	0.00524921	0.0708019	0.0191439	0.101147	0.29999	0	0.141285	0	0.0531954	0.0747759	0.116283	0.0487623	0.13119	0.155894	0.103854	0.0991698	0.0761608	0.0953929	0.0608998	0	0.0514656	0.293918	0.0424622	0.0337273	0	0	0.021894	0
RNF19B	0.0799597	89	0.846593	0.01556	0.112953	0.0356372	0.0722386	0	0	0	0	0.0217443	0.0250239	0.0274291	0.0494945	0.0311407	0	0.0630403	0.00650811	0.0503871	0.0166962	0.0147172	0.0367881	0	0	0	0	0.508074	0.459495	0.0352056	0.16591	0.0746967	0.350015	0.16946	0.0684605	0.0882167	0.137207	0.105044	0.146748	0.0988446	0.0548256	0.0909341	0.100117	0	0	0	0	0	0
RNF2	0.0369431	239	0.45137	0.022546	0	0.121128	0.063168	0	0	0	0	0.0524968	0.0646833	0.0612851	0.0512859	0.0557336	0	0.0173721	0.0237805	0.0371111	0.0219936	0.0257251	0.0443755	0.0496315	0	0	0	0.0695494	0	0.0542811	0.0807621	0.0320906	0.127565	0.169245	0.028504	0.0431704	0.0278726	0.140183	0.0749278	0.0568736	0	0	0.0338647	0.00751986	0.0337955	0	0.0723212	0.105159	0
RNF20	0.0345562	248	0.382486	0.0434185	0.0673447	0	0.0311697	0	0.101738	0	0	0.0116312	0.0296088	0.0164735	0.00449275	0.0172866	0.0282234	0	0.0180417	0.0371954	0.0211997	0.0178423	0.0558092	0.0191439	0.131191	0	0	0.0286595	0	0.0936488	0.0449138	0.0460542	0.0428694	0.0433836	0.0747572	0.0499726	0.0309655	0.077677	0	0.0212643	0	0.060022	0.0475952	0.0133383	0.0295249	0	0	0	0.211773
RNF213	0.103932	56	0.769073	0.170854	0.23726	0.153158	0.21705	0.415041	0.265655	0	0.155563	0.046295	0.0413096	0.102295	0.0735965	0.0502445	0.0204896	0.0610496	0.063559	0.211266	0.155255	0.0521202	0.133159	0.0892597	0.299433	0.274385	0	0.110098	0.0466738	0.088932	0.146904	0.0925861	0.076174	0.199868	0.0794011	0.0681055	0.0893205	0.060414	0.0540265	0.141128	0.0562453	0.0277618	0.148293	0.0732423	0.13406	0	0.159611	0.0293284	0.213961
RNF214	0.0206578	343	0.296191	0.0151455	0	0	0.0339393	0	0	0	0	0.0186293	0.0310154	0.00910316	0.0200399	0.0237919	0.0334167	0.0127337	0.0300038	0.00882915	0.0325593	0.0368471	0.0224694	0.0257688	0	0	0	0.00839694	0	0.0370901	0.0215458	0.0216476	0.0215645	0.028092	0.0129782	0.0237809	0.0221099	0.0185036	0	0.0352829	0.0670315	0	0.0457147	0.0258639	0	0	0	0	0
RNF215	0.00383151	488	0.0892107	0.00735927	0	0	0.0184792	0	0	0	0	0	0	0	0.00990236	0.00635738	0	0	0.00595203	0	0	0.00177611	0.00290536	0	0	0	0	0.00357143	0	0	0.00385044	0.00964852	0	0.0119097	0	0.0050018	0.00828255	0	0	0.0383097	0.0590947	0.064292	0	0	0	0	0	0	0
RNF216	0.0402102	226	0.692895	0.0141921	0	0	0.0654114	0.104555	0	0	0	0.0293727	0.042212	0.0531993	0.0226261	0.0335979	0.0586556	0.0296312	0.0147266	0.0983496	0.0132303	0.0207923	0.0299058	0.0258655	0.0962954	0	0.097844	0.0299735	0	0	0.0325066	0.0322894	0.0494466	0.0259317	0.0143122	0.0292882	0.0371066	0	0.0371051	0.0540074	0.119811	0.0249464	0.0703216	0.017619	0.0281745	0	0	0.0589281	0
RNF217	0.0375999	237	0.396101	0.0306872	0.182753	0	0.0752367	0	0	0	0.175156	0.00291031	0.00976211	0.00513569	0.0356428	0.01738	0.027037	0	0.0119272	0.0579838	0.0132303	0.00367271	0.030238	0.062438	0	0	0	0.167713	0.216195	0.0610448	0.062342	0.0805287	0.0440839	0.0927059	0.0765392	0.201393	0.120163	0.0166128	0.177068	0.117507	0.173306	0.077782	0.0582408	0	0	0	0	0	0
RNF219	0.0176152	369	0.491252	0.0152574	0	0	0.0229642	0	0	0	0	0.00485508	0.00618911	0.0174485	0.0142328	0.00606284	0.0335639	0.0331192	0.00802194	0.0135138	0.013531	0.0106282	0.0031306	0.0253758	0	0	0	0.0212002	0.0409454	0	0.0123095	0.0194013	0.00731795	0	0	0.0277919	0.0160923	0.0322247	0.00585313	0.0106922	0	0.0294659	0.0365719	0.00950054	0	0	0.140829	0.0365828	0
RNF220	0.0661502	125	0.63137	0.0558528	0.0400377	0.0403641	0.0687236	0	0	0	0	0.0118165	0.0433155	0.018173	0.0415113	0.0371683	0.0262099	0.017065	0.0177246	0.0114782	0.0434939	0.0239474	0.0326849	0.0213675	0.0966697	0	0	0.0634293	0	0.0156995	0.0357299	0.0399933	0.0192819	0.0831949	0.0255774	0.0368313	0.0356802	0.0607621	0.0368614	0.0430517	0.0548256	0.0870871	0.0575799	0	0	0	0	0	0
RNF24	0.071899	106	1.17365	0.0564997	0.0593925	0	0.0306483	0	0	0.131959	0	0.0170957	0.0793504	0.0604614	0.0538683	0.0549575	0.0333198	0.0191772	0.0362562	0.0116927	0.0266842	0.0447113	0.044695	0.0135529	0	0.286113	0.0956809	0.0305155	0.226288	0.107899	0.0566825	0.0519639	0.104936	0.0726747	0.0591142	0.0927133	0.0255864	0.0438175	0.144624	0.092411	0.0537927	0.269229	0.126822	0	0	0	0	0	0
RNF25	0.0246747	306	0.246323	0.0170485	0	0.0495216	0.0125986	0	0.142077	0.139519	0	0.0441964	0.0476699	0.0477496	0.0207419	0.0128029	0.0821176	0.0638984	0.0205979	0	0.0116199	0.0175629	0.0167994	0.115112	0	0	0	0.0122693	0.0943143	0	0.0103185	0.0118114	0.0278235	0.0220073	0	0.0121474	0.0365803	0.0177984	0.0110408	0.0428421	0	0.0282392	0	0.00704683	0.0343347	0.159502	0	0	0
RNF26	0.0253292	302	0.342968	0.0358351	0	0	0.026138	0.0946419	0	0	0	0.0147526	0.0138491	0.0114401	0.0286206	0.0257602	0.0530901	0.017125	0.0182621	0.048116	0.0117924	0.0337391	0.0251275	0.0135529	0	0	0	0.0137171	0.0378708	0	0.0159485	0.0214761	0	0	0.013687	0.0121955	0.0320879	0	0.00545098	0.0444477	0.0568133	0	0.0131126	0	0.0359816	0	0	0.0228855	0
RNF34	0.0552778	160	0.597183	0.0307524	0.0454023	0.0432227	0.0465448	0	0	0	0	0.0564025	0.0598787	0.107683	0.0389679	0.0511998	0.0453286	0.0483031	0.0283728	0.037888	0.0443524	0.0486636	0.037059	0.0242012	0	0	0	0.0400911	0.156002	0.0694664	0.0471568	0.0355234	0.0275118	0.0806973	0.0130905	0.0264408	0.0551396	0.040639	0.00935796	0.0342009	0	0.0281296	0.0349946	0.0314642	0	0	0	0.0458616	0
RNF38	0.056445	156	0.314045	0.0651099	0.0618247	0.0683183	0.0707209	0.109497	0	0.144694	0	0.0293787	0.0279797	0.0199599	0.014756	0.0185517	0.0616121	0.0173721	0.0171076	0.134143	0.0203168	0.0126945	0.0812503	0	0.172242	0	0	0.113572	0.234462	0.137763	0.0796442	0.0789942	0.112543	0.151015	0.169794	0.0873001	0.157841	0.249567	0.0806195	0.0474378	0	0.0269171	0.138153	0.0325744	0.0808847	0	0	0.0870512	0
RNF4	0.0926696	66	0.970743	0.0475752	0.0674993	0.0678243	0.0597644	0	0.384195	0	0	0.086638	0.107312	0.118641	0.0653928	0.105483	0.0905913	0.122421	0.0337324	0.0601625	0.029518	0.0480299	0.0534227	0.0364183	0	0.239393	0	0.141033	0.101978	0.126239	0.0778015	0.0551617	0.122679	0.129429	0.0851964	0.0611865	0.168722	0.155919	0.124795	0.102155	0	0.0540655	0.154327	0.0587481	0	0	0.184128	0.140656	0.2148
RNF40	0.0480422	191	0.769202	0.0285152	0.0688389	0.0971549	0.04436	0.10958	0	0.135381	0	0.050318	0.025595	0.0837843	0.0543102	0.0456735	0.0552604	0.0839406	0.0522916	0.0260919	0.043046	0.0445518	0.0452323	0.0243104	0	0	0.097844	0.0535331	0.14334	0.0683585	0.0658901	0.0523386	0.0588326	0.121163	0.0756141	0.0474899	0.05321	0.0365282	0.0409305	0.031297	0	0.0289244	0.0976008	0.0266281	0.0328812	0	0	0.0544424	0
RNF41	0.0520147	170	0.331744	0.0893776	0.0601448	0.0360041	0.0676737	0.1937	0	0.13389	0	0.0537464	0.04821	0.0757803	0.0299565	0.041892	0.0908432	0.0978911	0.063585	0.0511657	0.0200702	0.0152403	0.0573573	0.0388859	0	0	0	0.0927653	0.273421	0.0594572	0.0539986	0.061201	0.0733981	0.0719903	0.138221	0.0422312	0.0490248	0.0797866	0.0468701	0.0782042	0.150889	0.0259117	0.0745436	0.0210675	0.0323552	0	0	0.0365828	0.211773
RNF44	0.0919166	70	0.704149	0.0894719	0.190651	0.0367182	0.172818	0.206125	0.704149	0.109474	0	0.0532168	0.0547884	0.0536992	0.0587396	0.0299795	0.0631195	0.0158325	0.022797	0.101128	0.0461098	0.0492263	0.0669904	0.0487025	0.145527	0	0	0.171273	0	0.110192	0.0897328	0.0880413	0.0967386	0.136352	0.141772	0.0931407	0.118704	0.0767945	0.15672	0.0719924	0.167851	0.026075	0.22108	0.0198981	0.0619782	0	0	0.0875579	0
RNF5	0.144105	36	1.15131	0.100321	0.0593925	0.160504	0.0707862	0.0872623	0	0	0	0.457473	0.211061	0.182592	0.157914	0.122283	0.242598	0.154533	0.330577	0.0912952	0.390397	0.399211	0.129728	0.270255	0.249003	0.300909	0.51654	0.0764865	0.240457	0.0878486	0.0722577	0.0648469	0.0862912	0.101401	0.11007	0.0721402	0.0826319	0.112646	0.0494798	0.0817353	0	0.087011	0.0921628	0.11042	0.175415	0	0	0.261944	0
RNF6	0.0765083	102	0.453378	0.0405248	0.0651658	0	0.0870859	0	0	0	0	0.0595133	0.0625363	0.0722987	0.0391814	0.093673	0.0579178	0.0480887	0.0450226	0.0658803	0.0595424	0.051527	0.0251601	0.0932585	0.158553	0	0.1018	0.173244	0.296242	0.0959432	0.0800726	0.072693	0.109645	0.0803929	0.104863	0.0595038	0.0864357	0.0901241	0.0616686	0.11377	0.107131	0.0819807	0.0693606	0.00657852	0	0	0.10654	0.0925476	0
RNF7	0.296805	12	1.15344	0.194223	0.125546	0.14515	0.151721	0.103384	0.247716	0.141761	0	0.602415	0.477079	0.406247	0.400078	0.464573	0.360882	0.358664	0.792282	0.332201	0.788466	0.839333	0.45937	0.512341	0.713196	0.248389	0.917652	0.121008	0.209945	0.192152	0.159174	0.198742	0.143451	0.159053	0.183669	0.163098	0.153577	0.197504	0.187363	0.23508	0.179676	0.207836	0.237116	0.239587	0.283961	0.320422	0.208287	0.411016	0.199372
RNF8	0.0302011	275	0.432773	0.0283417	0.0674993	0.0251587	0.0193022	0	0	0	0	0.0996507	0.0297857	0.0440712	0.0443904	0.0122891	0	0.0160564	0.0704775	0	0.063282	0.0592431	0.0429244	0.0448929	0.0936345	0	0.292633	0.0399617	0.0988575	0.0365177	0.0200849	0.0283512	0.0210575	0.0284993	0.0644302	0.0557459	0.0346011	0.0142557	0.0589385	0.03687	0.0564748	0.0782947	0.0332595	0.0187528	0	0	0	0.0829466	0
RNFT1	0.0433668	211	0.57445	0.0341651	0.128043	0.178826	0.0703688	0	0.129651	0	0	0.0374503	0.0616858	0.0358769	0.0126095	0.0228923	0.0453286	0.0331399	0.0345696	0.0474251	0.0352828	0.0488853	0.0235685	0.0474938	0.176137	0	0	0.0166376	0.054195	0.077445	0.0603115	0.0437542	0.0402364	0.0393218	0.0976111	0.0603163	0.0597463	0.0987658	0.0103184	0	0	0.0330061	0.0571884	0.00888056	0	0	0	0.0665276	0
RSPRY1	0.0600211	145	0.397097	0.0291496	0.10677	0.0246546	0.0375301	0.108443	0	0	0	0.0197932	0.0437291	0.0411926	0.0268289	0.0184634	0.0660706	0.0916881	0.029484	0.0594432	0.0298179	0.0351783	0.0416713	0.0487818	0.0651472	0.26653	0.104034	0.146364	0.232403	0.108272	0.063034	0.0556304	0.132559	0.0744644	0.0359408	0.0996473	0.0834081	0.0644295	0.0737356	0.0790844	0.0521128	0.0630505	0.0559436	0.0139372	0.0877949	0.178689	0	0.0433464	0
SF3B3	0.0719653	105	0.518356	0.0684786	0.111814	0.0624255	0.0262099	0.205672	0	0	0	0.0384988	0.0589374	0.0354504	0.0767516	0.054658	0	0.0507715	0.0417984	0.0647523	0	0.0410682	0.0454755	0.12906	0	0	0	0.184313	0.277484	0.0511837	0.054242	0.0839849	0.0478939	0.067595	0.058931	0.0595444	0.078522	0.0783332	0.0819222	0.0870779	0.119796	0.18675	0.185284	0	0.0655892	0	0	0.0485857	0
SH3RF1	0.0455647	199	0.57719	0.00714304	0	0	0.0509065	0	0	0.142823	0	0.00431098	0.00283898	0	0.00999449	0	0	0	0.0196932	0	0.0239561	0.010415	0.00851836	0	0	0	0	0.0324908	0.0542831	0.0195067	0.0289473	0.0570676	0.015087	0.019143	0.0670381	0.0968788	0.0456063	0.0795605	0.0980287	0.108573	0	0	0.0588902	0.0321939	0.0504524	0	0	0.1211	0
SHKBP1	0.0614074	140	0.692895	0.0666784	0.0639702	0.200142	0.0955075	0.0966272	0	0.648125	0	0.0796964	0.132172	0.10976	0.0844773	0.138424	0.151603	0.199065	0.0468483	0.0389941	0.0251701	0.0286064	0.0387276	0	0.0735513	0	0.0982104	0.023232	0.054195	0.01415	0.0684967	0.0274968	0.0785204	0.070796	0	0.0254955	0.0399117	0	0.00914606	0.0360454	0	0	0.0225774	0.0623872	0.109944	0	0.100972	0.105575	0
SHPRH	0.021106	340	0.128393	0.045147	0	0.0672398	0.0237789	0	0	0	0	0.00341024	0.00234946	0.00966311	0.00753238	0.0121787	0	0.0152284	0.00368674	0.0138578	0.0117924	0.0113243	0.0203741	0	0	0	0	0.023672	0	0.0344576	0.0186912	0.0220078	0.0077979	0.00984712	0.0705373	0.0197059	0.0264346	0.0169389	0	0	0	0	0.0103298	0	0	0	0	0	0
SIAH1	0.0674333	118	0.386598	0.051989	0.0639702	0.040624	0.0939072	0	0.278058	0.13441	0	0.0553926	0.059	0.0250423	0.0572727	0.0257278	0.0262545	0.0792757	0.0332375	0.0367519	0.0356163	0.0357066	0.0512354	0.0263488	0	0	0	0.170156	0.165076	0.108421	0.162911	0.0919849	0.174948	0.186697	0.117987	0.12114	0.135601	0.0691971	0.386598	0.12497	0	0.0556367	0.140642	0.00666082	0.0599529	0	0	0	0
SIAH2	0.0792551	93	0.674443	0.201863	0.674443	0.136818	0.354614	0.0949978	0.401575	0.125825	0	0.170507	0.0587055	0.0750728	0.0401006	0.0361215	0	0.0338496	0.285388	0.0595502	0.271489	0.271311	0.131596	0.138848	0.242219	0	0.10286	0.118594	0.450982	0.241973	0.190608	0.0813598	0.128763	0.189834	0.0712751	0.0533222	0.101958	0.0804382	0.114422	0.0688861	0.126676	0.0599792	0.0959276	0.0547097	0.0659713	0	0.0847093	0.100836	0
SKP2	0.0180273	366	0.216033	0.0238596	0	0	0.0264182	0.0949978	0	0	0.184519	0.00899976	0.00579808	0.0145117	0.00509415	0	0	0	0.0195089	0.0131984	0.0368262	0.00501778	0.0223793	0	0	0	0	0.00419317	0	0.0165764	0.0109484	0.0118363	0.00742609	0.0120483	0	0.00498974	0.0292629	0.0197639	0.0167944	0.0120057	0	0	0.012391	0.0208457	0	0	0	0	0
SMURF1	0.0347351	247	0.806357	0.0405419	0	0	0.0236276	0	0	0	0	0.0077682	0.0134866	0.0267574	0.0368734	0.0168371	0	0.0144346	0.00464959	0.0577774	0	0.0045252	0.0428182	0.0243104	0	0	0	0.06238	0.122917	0.0390345	0.0404006	0.0398409	0.0794532	0.0552158	0.0572438	0.0367148	0.0522922	0.126247	0.0252258	0.0786848	0	0.0831891	0.0595884	0	0	0	0	0.0763211	0
SMURF2	0.0661281	126	0.397097	0.0418828	0.193863	0.0742415	0.0358057	0	0	0	0	0.0199066	0.0328984	0.00290372	0.035597	0.019234	0	0.0310804	0.013196	0.0601746	0	0.00682472	0.0400495	0	0.129252	0	0	0.171199	0.276755	0.054343	0.075404	0.106513	0.0758959	0.0946762	0.116878	0.0881723	0.0863321	0.0219305	0.135815	0.16178	0.257671	0.0922902	0.222596	0	0.0218895	0	0	0	0
SOCS1	0.0184034	361	0.421014	0.0225089	0	0	0	0	0.101738	0.139918	0	0.0455741	0.0128243	0.0608524	0.0485682	0	0.0679926	0.0289287	0.0107809	0.0068257	0.0216	0.0013042	0.0542158	0.0259834	0	0	0	0.0392618	0.120962	0.0485109	0.0233711	0.0170837	0.0151315	0	0.0552735	0.0175255	0.0173814	0.320977	0.0582272	0.0211935	0	0.0353638	0	0	0	0	0	0	0
SOCS3	0.457979	5	2.77038	1.45741	0.335212	0.387281	0.447043	0.107656	0.254691	0.254622	1.21692	0.773194	0.20544	0.249888	1.37924	0.423134	0.583981	0.468859	0.185413	1.81196	0.235139	0.28586	2.32189	0.413248	0.462503	0	0	1.53794	0.497984	0.478564	0.833931	0.712756	0.985293	0.600446	1.11678	1.60629	1.74196	0.707799	1.65087	0.719651	0.57757	0.49154	0.732348	0.0467985	0.0576333	0	0.17432	0	0
SOCS4	0.0381668	233	0.672458	0.00660658	0	0.0323319	0.0365929	0	0	0	0	0.0203152	0.0283939	0.0547956	0.00875583	0.0609472	0	0.0156708	0.00820095	0.0130683	0.025808	0.010005	0.0412099	0	0	0	0	0.0834604	0.0542831	0	0.0620175	0.0299609	0.0534723	0.0359633	0.038037	0.0288233	0.0609843	0.0375426	0.0409049	0.0526018	0.0537927	0.149444	0.039452	0	0	0	0.114964	0	0.267602
SOCS5	0.0507246	180	0.477477	0.051341	0.0645806	0	0.0560241	0.108443	0	0	0.293655	0.0470138	0.0196911	0.0150895	0.0322201	0.0196016	0	0.0333094	0.0225655	0.0794631	0	0.00984564	0.0621039	0.0356371	0.0777193	0	0	0.161497	0.0657148	0.0164593	0.0517079	0.0576526	0.0494804	0.0297622	0.0466716	0.0753465	0.141621	0.101202	0.107728	0.132224	0	0.239415	0.0494505	0	0	0	0	0	0
SOCS6	0.0652091	129	0.66848	0.0205807	0.129139	0.030656	0.033798	0	0.109657	0	0	0.0287887	0.0343861	0.0254656	0.0165712	0	0	0.0331748	0.0203328	0.0364787	0.0244197	0.0214134	0.0257962	0.0259046	0	0	0	0.0486295	0.447998	0.0180603	0.0680035	0.0349383	0.0525085	0.130125	0.0383466	0.0196866	0.0724494	0.0799534	0.0185307	0.0628249	0.0544815	0.116229	0.0236131	0	0	0	0	0.0696056	0.168734
SOCS7	0.014012	398	0.394855	0.0229397	0	0	0.0207719	0.0949978	0	0	0	0.0128496	0.00277517	0.014779	0	0.00599347	0	0	0.00677043	0	0.0127514	0.00877119	0.0178646	0.0186077	0	0	0	0.0063696	0	0.0351214	0.0133906	0.0132921	0.0215941	0	0.0286927	0.0156567	0.0180102	0	0.0188756	0.024917	0	0	0.0225545	0	0	0	0	0	0
SPOP	0.126794	45	0.588503	0.075649	0.0438423	0.0747078	0.108656	0	0	0	0	0.11367	0.120172	0.0959338	0.111132	0.103001	0.12474	0.033587	0.0904234	0.120471	0.158179	0.120474	0.167094	0.207372	0	0.267144	0.0982104	0.178276	0.119903	0.125574	0.0912038	0.120063	0.101922	0.105181	0.130973	0.13159	0.163455	0.0666219	0.0774693	0.110741	0.274703	0.0581624	0.11019	0.150301	0	0.174605	0.0587293	0.118616	0
SPOPL	0.0492296	187	0.712484	0.00660331	0.0591265	0.0800672	0.0796722	0.106662	0.109657	0.139519	0.162707	0.0210576	0.0337086	0.0180509	0.0120672	0.0195217	0	0.0173092	0.0119359	0.0324841	0.0123726	0.0091455	0.0428914	0.0294907	0	0	0	0.0625895	0.264573	0.0329501	0.0772417	0.0620157	0.0753272	0.0851104	0.0852025	0.0627983	0.065578	0.130652	0.0485535	0.114717	0	0.0279025	0.0445825	0.0211141	0	0.332021	0	0	0.199372
SPSB1	0.102344	59	0.709894	0.0676231	0	0.130882	0.0187226	0.106438	0	0	0	0.0624458	0.0303425	0.0182846	0.0517032	0.0164663	0.0670764	0.0298776	0.00613378	0.0713707	0	0.00896443	0.0706334	0	0.0651472	0	0	0.241852	0.0542579	0.104103	0.0651809	0.135972	0.105548	0.115946	0.0662296	0.182376	0.0836531	0.104481	0.505019	0.150897	0.0717749	0.294983	0.0975173	0	0	0	0.119324	0.0299569	0
SPSB3	0.0842694	82	0.773999	0.0414731	0	0.0251587	0.0624891	0.104625	0	0	0	0.373316	0.120312	0.230594	0.225298	0.11868	0.175816	0.112386	0.27572	0.220107	0.219234	0.345732	0.162743	0.0485078	0.171836	0	0.50536	0.0266037	0.0600303	0.112768	0.0442441	0.0419312	0.0205496	0.0740524	0.0158573	0.0532663	0.047933	0	0.0470198	0.0722594	0	0.0291643	0.0727889	0.133375	0.107664	0	0	0.154042	0
STUB1	0.0765703	101	0.559102	0.0512047	0	0.127856	0.103928	0.0949978	0	0	0	0.178069	0.0839576	0.119035	0.0931719	0.0363448	0.157425	0.0470484	0.0790961	0.0963791	0.0947919	0.116143	0.0867148	0.152346	0.0744836	0.268386	0.106045	0.0598447	0.0876192	0.0739694	0.0607726	0.0538727	0.107139	0.0834264	0.0797518	0.065958	0.0903209	0.0588271	0.0496789	0.115086	0	0.0815214	0.100629	0.0460097	0.0665975	0	0	0.0232789	0.20534
SYVN1	0.126579	46	1.37872	0.0732699	0	0.152962	0.0373528	0	0	0.288078	0.172244	0.0397647	0.0680387	0.0613015	0.0426201	0.0519658	0.0523092	0.116841	0.0352663	0.0540272	0.0572088	0.0483426	0.0442159	0.0452774	0	0	0	0.0353314	0.120791	0.49951	0.0861814	0.0539776	0.114152	0.109372	0.049816	0.0432436	0.0460234	0.0387269	0.0378911	0.047764	0	0.0746037	0.0795227	0.168506	0.0321795	0.318887	0	0.0466392	0
TCEB3	0.0585895	147	0.348823	0.0531022	0.0571865	0.0713929	0.0373165	0	0	0	0	0.0523561	0.0795318	0.0610596	0.0420492	0.0328414	0.135728	0.0329939	0.0282298	0.0314673	0.0170655	0.0302523	0.0376358	0	0	0	0	0.159075	0.162118	0.0344604	0.0801862	0.0545762	0.143593	0.0790153	0.0791737	0.077239	0.0853455	0.0929785	0.115095	0.0361641	0	0.16885	0.110947	0.01162	0.0325542	0	0	0.0765363	0
TNFAIP1	0.0549912	161	0.840175	0.0199173	0.09792	0.0365868	0.0318983	0	0	0	0.167824	0.0388539	0.0369307	0.0187476	0.0832391	0.0120982	0	0.0752112	0.0186355	0.0555389	0.0464047	0.0287536	0.124821	0.101232	0	0	0.0900652	0.264597	0.174169	0.0355332	0.0406981	0.0374716	0.0606029	0.0643976	0.0365599	0.022244	0.110695	0.0577418	0.0375634	0.041008	0	0	0	0	0	0	0	0	0
TNFAIP3	0.397847	7	2.39432	0.406691	1.45438	0.601861	0.978974	0.656383	0.852043	0.680005	2.01285	0.309978	0.586665	0.747487	0.646133	0.686274	0.573008	0.891529	0.0558599	0.355645	0.423025	0.0607677	1.2316	0.245117	0.0651472	0.552643	0.106774	1.61456	0.997408	1.03875	2.34	0.599826	2.3155	1.57785	0.661193	0.701776	1.0939	1.69568	0.94127	1.11003	0.743132	1.005	1.29746	0.239353	0.973234	0.174605	0.20817	0.125837	0.164458
TOPORS	0.0571661	153	0.293939	0.0210013	0	0.0234235	0.0325302	0	0.109657	0	0	0.0560451	0.0342298	0.0596869	0.0552324	0.0453405	0.0328498	0.0352526	0.0149964	0.0461431	0.0491224	0.0244603	0.054812	0	0	0	0	0.0682295	0.106662	0.0346271	0.0434047	0.056415	0.0405262	0.0942945	0.113192	0.0781018	0.0719075	0.0367162	0.117776	0.0909278	0.067208	0.0810824	0.101682	0.0466667	0	0.178689	0	0.0690779	0
TRAF3	0.0341728	251	0.213141	0.0288512	0.058446	0.0267554	0.00884484	0	0.141137	0	0	0.0176342	0.0629772	0.0325111	0.00486975	0.0621656	0.0830134	0.102303	0.00450457	0.00844192	0	0.00445558	0.00304528	0	0.0651472	0	0	0.039601	0	0.172394	0.0825433	0.0274817	0.17895	0.0579755	0.0392937	0.0260746	0.041809	0.148606	0.0499372	0.071724	0.0678191	0.0553746	0.0356711	0.0265619	0	0	0.103941	0	0
TRAF4	0.0665455	122	0.615835	0.0081149	0	0	0.0135733	0	0	0	0	0.117258	0.0357289	0.0716835	0.0540612	0.0210581	0	0.0620102	0.0160598	0.035783	0.0251781	0.0324902	0.0378993	0	0	0	0	0.094796	0.400588	0.0763222	0.0490033	0.0170463	0.0444691	0.0171498	0.0129782	0.0286432	0.0480128	0.0359291	0.0828876	0.0568117	0	0.0586103	0	0.132702	0.234019	0.190222	0.178053	0.0882643	0
TRAF5	0.0332293	256	0.651139	0.0882006	0.108877	0	0.0519947	0	0	0	0	0.015188	0.0154802	0.0228871	0.0356354	0.00522136	0.0282234	0	0.0121522	0.0258481	0.0218981	0.00941327	0.0384495	0.0200101	0	0	0	0.043799	0	0.0307791	0.0469891	0.0288207	0.039874	0.0724359	0.0802028	0.0424717	0.0360015	0.0215044	0.0494389	0.0580227	0.132514	0.0279025	0.0728145	0.0144653	0.0635332	0	0.105626	0.0473589	0
TRAF6	0.022743	320	0.494833	0.00658056	0	0.0416661	0.0266914	0	0	0	0.172244	0.0359221	0.0110512	0.0404799	0.0199842	0.0121382	0.0576665	0.0333966	0.0159284	0	0.0203825	0.0150055	0.017625	0	0	0	0	0.0437167	0	0.0266949	0.0497364	0.0236046	0.0732931	0.0753721	0.0130905	0.037522	0.0717726	0.0388211	0.0456514	0.0551321	0	0.0308248	0.0653898	0.018346	0	0	0	0	0
TRAF7	0.0531411	167	0.529079	0.0697706	0.128979	0.0687753	0.0533269	0	0.101738	0	0.171226	0.0543359	0.060329	0.0303987	0.0745018	0.0172364	0.100789	0.0158325	0.0524229	0.109722	0.0489766	0.0508771	0.110405	0.0166124	0.0651472	0	0	0.0634457	0.256556	0.0361902	0.0465837	0.0435847	0.0304684	0.0888381	0.036911	0.0444637	0.0565765	0.0535466	0.0882001	0.0493919	0	0.113983	0.0779646	0.0370806	0	0	0	0.12765	0.213961
TRIM11	0.0201402	350	0.288754	0.00785084	0.0656757	0	0.0277559	0	0	0	0	0.0123979	0.0358161	0.0459941	0.0226532	0.0401294	0.0261213	0.0593236	0.00794661	0.0234811	0.0220522	0.0156253	0.0206317	0.0220527	0	0	0	0.0208534	0.0378708	0	0.0262637	0.0162808	0.0355359	0.0552832	0.0139572	0.0162322	0.0140611	0	0.0267376	0.0136285	0	0.0650767	0.0111802	0.02164	0	0	0	0	0
TRIM13	0.0605236	142	0.651139	0.0240872	0	0	0.0291479	0	0	0	0.168772	0.0225784	0.0389164	0.0483368	0.047957	0.0235762	0.0293492	0.10646	0.0546815	0.0853915	0.0450956	0.0894835	0.0527938	0.0953992	0	0.248389	0	0.0966284	0.124892	0.0576743	0.0489714	0.053942	0.046778	0.041705	0.0575764	0.0567223	0.0468158	0.0150604	0.0792397	0.0410523	0.2002	0.0942262	0.0457628	0.0291869	0.0325542	0	0	0.095595	0
TRIM2	0.13702	38	1.57753	0.0201867	0.0629273	0	0.0147136	0	0	0	0	0.0182393	0.00569066	0.00319882	0.0177939	0	0	0	0.00786123	0.0508049	0.0117534	0.0146321	0.0768839	0	0	0	0	0.0545244	0.0699258	0.043913	0.0370006	0.146255	0.0546044	0.0116202	0.125347	0.112967	0.0522067	0.0787209	0.0777702	0.0855822	0.0537927	0.0286265	0.11334	0.0343954	0.0569368	0	0	0.163076	0
TRIM21	0.0261466	297	0.265254	0.0149487	0.0640993	0	0.0173649	0	0	0.139918	0	0.0137433	0.0277997	0.0240125	0.0225223	0.0422303	0	0	0.0042804	0.0676033	0	0.0111812	0.0170686	0.0191439	0	0	0	0.0242281	0	0	0.0200964	0.0175375	0.034388	0.0687743	0	0.0256217	0.0458112	0.0836054	0.00868991	0.0420552	0	0.0297485	0.011621	0	0.0546468	0	0	0.0335257	0
TRIM22	0.188887	23	1.43151	0.130535	0	0.0781045	0.152198	0.318677	0.141761	0.225836	0	0.0346144	0.0491254	0.165353	0.111361	0.0569274	0.0198088	0.0781358	0.0103958	0.110932	0.0367486	0.0117816	0.071427	0.0189314	0.05764	0	0	0.429812	0.165394	0.160513	0.327218	0.43351	0.235358	0.236928	0.227129	0.472191	0.500792	0.269226	0.467617	0.472612	0.252194	0.294328	0.445822	0.0159537	0.185846	0	0.103941	0.0907036	0
TRIM23	0.0289634	287	0.275509	0.050671	0	0	0.0313865	0	0	0	0	0.0029439	0.0113881	0.0203497	0.0100927	0.0191979	0	0.0186018	0.00467902	0.0398457	0.0123497	0.0318827	0.0175917	0.0417452	0	0	0	0.0384895	0.275509	0.0161819	0.024666	0.0516164	0.0345829	0.0225609	0.0560622	0.0512619	0.0310996	0.0184635	0.0435109	0.0512219	0	0.140068	0.026139	0	0	0	0	0	0
TRIM24	0.0305111	274	0.312807	0.00697342	0	0	0.0276125	0	0	0	0.167824	0	0.0234324	0.0291592	0.0219001	0.0332291	0.0345252	0	0.0154463	0.0967217	0.0472001	0.0213438	0.0642237	0	0	0	0	0.0537855	0	0.056731	0.0330073	0.0185598	0.0422688	0.0631525	0.0262501	0.0139784	0.0169799	0.0739506	0.0639195	0.0251837	0	0.0245695	0.0105488	0	0	0	0	0	0
TRIM25	0.0615992	139	0.596201	0.0498237	0.0400377	0.054509	0.0834513	0	0	0.164541	0.173414	0.0415236	0.0638925	0.0559415	0.0986117	0.298726	0.0316456	0.0546292	0.0116134	0.0713519	0.010719	0.00690042	0.0584426	0	0	0	0	0.281308	0.217103	0.127919	0.0985647	0.0761218	0.0947603	0.100844	0.0943337	0.0545338	0.194669	0.03563	0.0795923	0.096397	0.1824	0.0316786	0.0220166	0.0139228	0.0343347	0	0	0.0518644	0
TRIM26	0.0445233	206	0.488639	0.0200518	0	0.0424347	0.0355871	0.108925	0	0	0	0.040217	0.0304854	0.0392077	0.0330071	0.027258	0.0334411	0.0330945	0.0156579	0.0270899	0.0234114	0.0153676	0.0336981	0	0.0696838	0	0	0.0800102	0.103117	0.0635087	0.0529294	0.0388249	0.0379174	0.030185	0.0752307	0.0395558	0.1073	0.0298922	0.0590372	0.0603197	0.114657	0.0753745	0.0218134	0.0608936	0.12749	0	0.108752	0.0339248	0
TRIM27	0.0649107	131	0.672458	0.0934466	0.127008	0.0267554	0.0750025	0.206629	0.274685	0	0	0.0581113	0.0730232	0.0996811	0.0932347	0.0523888	0.0435061	0.0639253	0.035472	0.086007	0.0494042	0.0378752	0.0584468	0.0248828	0	0	0	0.16285	0.114219	0.0603944	0.0844631	0.043965	0.0347263	0.0844454	0.101994	0.0513796	0.0696192	0.078063	0.0590682	0.115298	0	0.0341048	0.0337548	0.0227531	0.0563434	0	0.123578	0.112396	0
TRIM28	0.126575	47	0.697508	0.12347	0.245425	0.273946	0.174021	0	0.142077	0	0.475722	0.0565041	0.0532784	0.0798003	0.121958	0.0833842	0.0677405	0.0513156	0.047098	0.136956	0.0360484	0.0312136	0.102232	0.0960862	0.0878868	0.248389	0	0.262802	0.207048	0.0856157	0.148146	0.140985	0.173143	0.163879	0.188579	0.143039	0.180762	0.212761	0.230991	0.196174	0.204598	0.267003	0.232525	0.0626794	0.0847034	0	0.218134	0.236931	0
TRIM3	0.0115538	415	0.462387	0.021802	0	0	0.0276684	0	0	0	0.315256	0.00324092	0.00851534	0.014735	0.0153941	0	0.0309833	0.0127337	0.00520892	0	0	0.00843743	0.00511434	0	0	0	0	0.00426353	0	0	0.00757344	0.00698322	0.0316768	0.00869473	0.0513614	0.0106782	0.018429	0.0207164	0.0164546	0.00936441	0	0.0249464	0.0150473	0.0214926	0	0	0	0.0433464	0
TRIM32	0.0127109	408	0.178754	0.0123041	0	0	0.00971864	0	0	0	0	0.00358568	0.00328029	0.0156406	0	0.00701181	0	0	0.0142906	0	0	0.0214807	0.0058168	0.0251604	0	0	0	0.011322	0	0	0.0106673	0.00913672	0	0.0119382	0	0.0287215	0.00945918	0	0.0178738	0	0	0	0.0359432	0.016617	0.0392505	0	0	0.0419182	0
TRIM33	0.0822877	86	0.672458	0.0835187	0.153825	0.0659599	0.141839	0.0949978	0.401756	0.13389	0	0.0120859	0.0698043	0.0391525	0.033543	0.0533414	0.027037	0.0640868	0.0160872	0.0642074	0.022995	0.0264579	0.0553146	0.0166124	0	0	0	0.12082	0.0937354	0.0533678	0.128056	0.0826752	0.146976	0.229935	0.10589	0.0857091	0.0918023	0.125792	0.160682	0.0347408	0.129732	0.177335	0.204451	0.0378031	0.0173611	0	0	0.0339248	0
TRIM35	0.0151584	388	0.372081	0.0215093	0.0619783	0	0.0085961	0	0	0	0	0.0171089	0.0130473	0.00538775	0.00531607	0.0140442	0	0.0339463	0.0109084	0.0133039	0.0245384	0.00602527	0.0227161	0	0	0	0	0.0279155	0.0470616	0.020057	0.0066292	0.00948855	0.0224332	0.0368474	0.0140196	0.00483796	0.0166112	0.0212144	0.0417888	0.0351515	0	0	0.0214073	0	0	0	0	0	0
TRIM36	0.0155875	386	0.425972	0.0145509	0.0645806	0	0.00963064	0	0	0	0	0	0.0141547	0.0088804	0.00914595	0.0190195	0.0860458	0.0172471	0	0	0.025623	0	0	0.0381926	0	0	0	0.00665021	0	0.0368878	0.0256076	0	0.0675759	0.0349777	0.015659	0.00506255	0.00504062	0	0.0198223	0.0124632	0	0	0.0108787	0.00700588	0	0	0.0994188	0.0966604	0
TRIM37	0.0269117	296	0.485469	0.0536707	0.0454023	0.0384011	0.0365796	0	0	0.109474	0.156946	0.0294357	0.016819	0.014089	0.0235539	0.0116653	0.0325785	0	0.00951869	0.0135241	0.00826218	0.0205214	0.0422782	0.0234941	0	0	0	0.0306372	0	0.0167444	0.0265841	0.0301	0.0143834	0.0252988	0.0527785	0.0576232	0.0441228	0.0282146	0.0610662	0.0238758	0	0.144727	0.0936567	0.0232982	0.0624782	0	0	0.0390645	0
TRIM38	0.0603556	143	0.532364	0.0678203	0.123072	0.181413	0.151901	0	0	0	0.172244	0.0273145	0.0568655	0.0579677	0.0513218	0.0409365	0.119244	0.0182292	0.0111226	0.106512	0.0253938	0.0135729	0.0562061	0.0249857	0	0	0.0982104	0.0424226	0.0670394	0.0553485	0.0664412	0.0676399	0.0278593	0.054808	0.0983512	0.0669519	0.0430197	0.055773	0.0363998	0.023518	0.163347	0.0290436	0.116178	0.032507	0.0521594	0.160538	0	0.0791955	0
TRIM39	0.0170931	373	0.374087	0	0.0604262	0	0.00893252	0	0.134585	0	0	0.00576536	0.0104158	0.0169671	0.0326803	0	0	0	0.0101961	0.0204123	0	0.00199846	0.0183803	0	0	0	0	0.0295681	0	0.0357045	0.00879536	0.0167889	0.014038	0.033113	0.0482753	0.0143337	0.0102618	0.0199839	0.0196112	0.0370443	0.13923	0	0.0238142	0	0	0	0	0	0
TRIM4	0.0451243	201	0.421014	0.0446623	0.0454023	0.0424347	0.0537813	0	0.135025	0	0	0.0639608	0.0472737	0.0441286	0.0617843	0.0315306	0.0326906	0.0143177	0.0347665	0.02113	0.022781	0.0515493	0.0229238	0.0464787	0	0	0.30579	0.0992108	0.235025	0.0398023	0.0756047	0.0665719	0.0659734	0.051158	0.0899446	0.0608399	0.0490562	0.0550687	0.117848	0.0377799	0.0592629	0.0292728	0.12301	0.0336222	0.091823	0	0	0	0
TRIM41	0.0218052	333	0.489482	0.0388322	0.107227	0	0.0718095	0	0.124245	0	0	0.0063538	0.0107866	0.0201775	0.00984659	0.0111855	0.0203179	0	0.0108413	0	0	0.00790946	0.00850476	0.051091	0	0	0	0.0169481	0	0.0183794	0.0181794	0.0203457	0.0255866	0.021817	0.0259195	0.0145751	0.03694	0.03563	0.0169776	0.0398725	0.0521128	0	0	0.013873	0	0	0	0.0228855	0
TRIM47	0.0337453	253	0.583035	0.0381293	0.123308	0.0732192	0.0445361	0.206781	0	0	0	0.0620512	0.0557234	0.0194265	0.00969699	0	0.0301388	0.0181921	0.00735193	0.0836561	0.0310172	0.0193052	0.0562818	0.0210241	0.0651472	0	0	0.0547202	0.110376	0.0380321	0.0445709	0.0270875	0.030597	0.104231	0.0889067	0.0210208	0.13991	0.0688889	0.0536071	0.0314567	0	0.113809	0	0	0.0516957	0	0.130196	0.0375701	0
TRIM5	0.0284895	290	0.489482	0.0569594	0	0	0.00496437	0	0	0	0	0.0162037	0.0210951	0.0119846	0.0271916	0.012586	0	0.0366219	0.0214154	0.080883	0	0.0273622	0.0537785	0	0	0	0.0900652	0.060985	0	0	0.0290329	0.0734806	0.0132341	0.0212809	0.0509756	0.0655299	0.0545335	0.0181446	0.0285108	0.0688942	0	0.0490635	0.0687928	0	0	0	0	0.0353185	0
TRIM50	0.00144467	523	0.344266	0.00514618	0.0619783	0	0.0091212	0	0	0	0	0	0	0	0	0	0	0	0	0	0	0	0	0	0	0	0	0	0	0	0.00579603	0	0	0	0.014329	0	0	0	0	0	0	0	0	0	0	0	0	0	0
TRIM52	0.016434	380	0.267718	0.0147727	0	0	0.0264734	0	0	0	0.151808	0.00494387	0.00582053	0.00568414	0.00424339	0.00738694	0.0634653	0	0.00759688	0.0230125	0	0.0155582	0.0167249	0.0226863	0	0	0	0.0245811	0	0.0204228	0.00985861	0.0264357	0.0120067	0.0188268	0.0102479	0.020356	0.0362519	0.0226267	0.020874	0	0.063336	0	0.0117487	0	0	0	0	0	0
TRIM56	0.0848624	81	0.651139	0.088339	0	0.037806	0.0791392	0	0.141761	0.116363	0.162707	0.0218272	0.0442944	0.0275642	0.0631925	0.0184398	0.0323583	0.0487805	0.0570665	0.330723	0.0819988	0.050736	0.222486	0.0953387	0.075948	0	0	0.238246	0.0564435	0.0732204	0.0851034	0.178717	0.166255	0.0707349	0.172915	0.162166	0.281648	0.0926214	0.16686	0.167393	0.134953	0.221488	0.137106	0.0347364	0.099309	0	0.114964	0.0696284	0
TRIM6	0.00512802	473	0.268623	0	0	0.037806	0.00484115	0.106662	0	0	0	0	0	0.00280883	0.00445461	0	0	0	0.00499492	0.0120503	0.00881795	0.0104623	0.0133912	0.0243419	0	0	0	0.00131428	0	0	0.0166238	0.0208887	0.0130899	0	0	0.00729153	0.00790744	0	0	0.0145019	0.063336	0	0.0125408	0	0	0	0	0	0
TRIM65	0.0110703	418	0.196702	0	0.0400377	0.0972182	0.0333096	0	0	0	0	0.00394664	0.0150637	0.00217044	0.00354671	0	0	0	0.00681348	0.0412652	0	0.00377331	0.00349819	0	0	0	0	0.0161841	0	0	0.0068807	0.0135795	0.0130121	0.029637	0	0.00831057	0.0170709	0	0	0	0	0.0244636	0	0	0	0	0	0	0
TRIM68	0.0110276	419	0.327753	0.0151892	0	0	0.00461755	0.111631	0	0	0	0.00448997	0.00271306	0.00918584	0.00521682	0.0136163	0.0320794	0	0.00528739	0.0535949	0.0110816	0.00885025	0.00872635	0.0701262	0	0	0	0.00693705	0.0670394	0	0.00670632	0.0141969	0.023647	0.0103314	0	0.00801399	0.0182074	0	0	0	0	0	0.0223578	0	0	0	0	0	0
TRIM69	0.0576019	152	0.361815	0.0207114	0	0.0267554	0.03747	0	0.135025	0	0	0.0739103	0.0339776	0.0197256	0.0361805	0.00570532	0	0.0184703	0.0355413	0.0731909	0.0236173	0.0640642	0.0731342	0.0846132	0.05764	0	0	0.0851186	0.0466738	0.0525739	0.0805566	0.109191	0.0287756	0.0515872	0.0692073	0.105961	0.113952	0.105727	0.0726945	0.108056	0.0649584	0.108448	0.0791944	0.0376413	0.0939573	0	0	0.0395399	0
TRIM8	0.0691756	114	0.668177	0.139597	0	0.0367182	0.145141	0.107734	0	0	0.510037	0.0131548	0.00909373	0.00897168	0.0273491	0.0100178	0	0.0139723	0.0246607	0.1187	0.0333726	0.0229995	0.0570211	0.0220527	0	0	0.1018	0.058476	0.130787	0.0563261	0.0563819	0.0881399	0.0218497	0.0684645	0.0931163	0.0872134	0.0768693	0.0787022	0.174318	0.178668	0.0572667	0.262668	0.0825804	0.0120254	0.0532993	0	0	0.0331396	0
TRIP12	0.136871	39	0.505554	0.0886869	0.0556514	0.156022	0.155603	0.203441	0	0.252556	0.32477	0.0446162	0.101893	0.0827143	0.0865356	0.118461	0.0774089	0.0832948	0.0308705	0.0553395	0.0187058	0.0300009	0.112066	0.066898	0.233233	0	0	0.36629	0.345192	0.155104	0.22021	0.124674	0.289121	0.252907	0.21296	0.163039	0.208983	0.245748	0.333395	0.149099	0.125854	0.505554	0.242814	0.0056325	0.121967	0	0	0	0
TTC3	0.147855	29	0.91855	0.0900761	0.290356	0.0377646	0.144573	0	0	0	0	0.111894	0.0609564	0.0568298	0.106193	0.0684235	0.119726	0.0754051	0.0844938	0.192578	0.0807555	0.115486	0.172204	0.0494083	0.0793142	0	0	0.0937353	0.253856	0.215645	0.134201	0.234624	0.0897577	0.095029	0.147626	0.24069	0.142532	0.18544	0.21812	0.176295	0.195499	0.138442	0.191423	0.0994878	0.0857424	0	0.225538	0.0228855	0.199372
TULP4	0.029778	280	0.360863	0.0160092	0	0	0.00886973	0	0	0	0	0	0.00505789	0.00916204	0.0103203	0.00585632	0	0.0150511	0.009181	0.0128551	0.0307064	0.00517551	0.0183756	0	0	0	0	0.058586	0	0.0178958	0.0367188	0.0288278	0.0627626	0.0438006	0.0424247	0.0284706	0.0510551	0.0345565	0.0432558	0.0738379	0.0521128	0.0276233	0.0613528	0.0165021	0.0173611	0	0.094556	0.0350996	0
UBE3A	0.145999	34	0.612318	0.108465	0.0687835	0.0775161	0.148719	0.103384	0.141761	0.14293	0	0.0740186	0.103723	0.0444991	0.0759605	0.096092	0.0868206	0.150164	0.102313	0.0751624	0.0730135	0.0623256	0.112464	0.0926641	0.0696838	0	0.101182	0.28616	0.136728	0.430108	0.220255	0.132672	0.217842	0.219966	0.220571	0.201565	0.184917	0.251341	0.234953	0.194873	0.0721735	0.466747	0.166235	0.0853092	0.0762522	0	0	0.103861	0.247907
UBE3B	0.0352499	246	0.491252	0.0420598	0.0668884	0.0805496	0.0717557	0.10958	0	0.129806	0	0.0388403	0.0322566	0.0339075	0.0329736	0.0175304	0.0203179	0.0331805	0.0300023	0.0347661	0.0343411	0.0252108	0.0343097	0	0	0	0	0.024867	0.0979011	0.014251	0.0467559	0.0372103	0.0421189	0.0534872	0.0537588	0.0559189	0.0921216	0.0450196	0.04467	0	0	0.0525182	0.0225188	0.0253758	0.0306941	0	0.128734	0.0232099	0
UBE3C	0.0545773	165	0.31927	0.0855128	0.0400377	0.0650753	0.0686717	0.0946419	0	0.14293	0	0.0153957	0.0442474	0.0060489	0.0197693	0.0605215	0.0296212	0.0473086	0.0116795	0.0651253	0	0.00774153	0.0427469	0.0204031	0.129252	0	0	0.126963	0.263306	0.073161	0.0699058	0.0710814	0.084049	0.0689911	0.0925087	0.0544211	0.127347	0.0330676	0.0993374	0.0826304	0.0652147	0.140531	0.093083	0.00658705	0.0436578	0	0	0.021894	0
UBE4A	0.0627273	136	0.590448	0.0374028	0.0675511	0.108269	0.111104	0.106662	0.127471	0	0	0.0340686	0.0291782	0.0216012	0.0188556	0.0366043	0.0681884	0.0475377	0.00909726	0.0713477	0.0402521	0.0063655	0.0440879	0.0378353	0.103999	0	0	0.0549382	0.176726	0.170958	0.102223	0.0808589	0.118037	0.0719879	0.0395701	0.090798	0.0779082	0.0573167	0.0347249	0.0699884	0.206857	0.0859095	0.0805036	0.0400416	0.0633218	0	0	0.0951943	0
UBE4B	0.0429628	213	0.668177	0.0582081	0.185935	0.213923	0.0535227	0	0.134585	0.129806	0.130949	0.0267813	0.0135931	0.0280603	0.00521283	0.0131001	0.0262545	0.0485468	0.0222591	0.0109531	0.0106185	0.0292941	0.0300783	0	0	0	0.097844	0.0573693	0.246368	0.0575667	0.0538608	0.053169	0	0.0328633	0.0801059	0.0676238	0.0673786	0.0486595	0.0395756	0.0621561	0	0.0308408	0.080781	0.0158368	0	0	0.0587293	0.0288675	0
UBR1	0.0368334	240	0.751465	0.0418171	0.121721	0	0.022487	0.0960918	0	0	0	0.00622301	0.00283166	0.0159614	0.0359351	0.00374994	0	0	0.0130733	0.0262998	0.00964206	0.00683505	0.0176708	0.0235222	0	0	0	0.0718982	0	0.0191709	0.0499223	0.0593357	0.0408032	0.0100482	0.0640103	0.0762331	0.0738487	0.0554085	0.0748809	0.0487836	0.0694089	0	0.0237901	0	0	0	0	0	0
UBR2	0.0562465	157	0.543016	0.0631145	0.18737	0.119707	0.0785642	0	0	0	0.327935	0.0337582	0.0156805	0.0350214	0.0409849	0.0245993	0.0296049	0	0.024621	0.0126127	0	0.0255435	0.0524391	0.0386386	0.0744836	0	0	0.0618476	0.324765	0.13402	0.0698512	0.0770925	0.0623719	0.0668278	0.145808	0.0710751	0.114506	0.0767287	0.0848048	0.0998114	0.0678191	0.0943259	0.0839236	0.0275993	0.0752123	0	0.102183	0.0588271	0
UBR3	0.0493891	185	0.491252	0.0439544	0.120566	0.0360041	0.0732369	0	0	0	0	0.0502431	0.0182398	0.0144258	0.010446	0.00575956	0.0346351	0	0.0255491	0.0532341	0.0236788	0.0505965	0.0310667	0.0409248	0.0888693	0	0	0.0646653	0.0952285	0.111616	0.0405403	0.0469382	0.0618141	0.116735	0.0635275	0.0412737	0.0675917	0.0743086	0.0645159	0.0832806	0.155841	0.0549994	0.0801771	0	0	0	0.106582	0.0802013	0
UBR4	0.0214454	336	0.444683	0.0231997	0.0661997	0.032474	0.00858756	0	0	0	0	0.00622101	0.0310322	0.00586469	0.00427196	0.0131485	0.0278548	0	0.00734042	0.0135138	0.0128199	0.00512342	0.00332617	0	0	0	0	0.0262801	0	0	0.0295003	0.0125001	0.0397225	0.0307564	0	0.0169552	0.0037339	0.0418034	0.0160832	0.0273268	0	0	0.0395878	0	0	0	0	0	0
UBR5	0.0726913	104	0.634908	0.0747065	0.175344	0.130828	0.070629	0	0	0	0.481501	0.0183908	0.0135171	0.0247038	0.0576913	0.0321639	0	0.0303423	0.0187431	0.0395963	0.0364056	0.00711684	0.0457952	0	0.0984179	0	0	0.18411	0.333601	0.0687947	0.123962	0.103374	0.0714764	0.0860438	0.125311	0.110311	0.0971524	0.149877	0.175332	0.133198	0	0.224765	0.149039	0.0201369	0	0	0.128961	0.0473589	0
UHRF2	0.103725	57	0.65501	0.0434074	0.136283	0.037806	0.0836975	0.0872623	0.258096	0.13389	0.16542	0.0267823	0.0321556	0.0551457	0.04473	0.0191338	0.0260774	0.0186553	0.0937033	0.130925	0.0996227	0.0947334	0.107684	0.0535866	0.0595683	0	0	0.304922	0.183998	0.0821514	0.126423	0.131005	0.108876	0.0787447	0.127483	0.170489	0.296046	0.230967	0.226391	0.270629	0.12727	0.208272	0.270868	0.0206447	0.0677058	0	0	0.0290834	0
UNK	0.0377814	236	0.441495	0.0293754	0.057975	0	0.0415723	0.130898	0.127471	0	0	0.0273272	0.0173318	0.0337013	0.0149967	0.0271419	0.0282234	0.0178811	0.0190805	0.0261214	0.0370746	0.0295232	0.0224626	0.0248489	0.0744836	0	0	0.0423494	0.145378	0.0965851	0.0152315	0.0329062	0.0350707	0.0462485	0.0414495	0.0402	0.0384026	0	0.0280035	0.0251151	0.0694089	0.0505441	0.0567577	0.0420085	0	0	0	0.119575	0
UNKL	0.0179296	368	0.443406	0.0210839	0.0651658	0	0.0281394	0.204673	0	0.136193	0	0.0112729	0.0144806	0.0229546	0.0175876	0.0181699	0	0	0.0233082	0.00995652	0	0.0034714	0.0246218	0.0237803	0	0	0	0.019828	0.0600303	0.031795	0.014189	0.0220826	0.00716876	0.0366074	0.0261529	0.0298783	0.0116219	0.0306072	0.00982112	0.00877203	0.074137	0.0302944	0.0115419	0.0248734	0	0	0	0	0
VHL	0.0428039	214	0.394455	0.0451972	0	0.0258554	0.0171528	0.100119	0.146421	0.394455	0	0.0461982	0.0942003	0.0794119	0.044238	0.146465	0.0249005	0.0404323	0.0197466	0.0536524	0.0305628	0.0433121	0.0296772	0.0450677	0.0984179	0	0	0.0610553	0.0564435	0.0713677	0.114683	0.0467901	0.128473	0.100382	0.0400825	0.0437265	0.0635581	0.0841706	0.0467988	0.0109253	0.056792	0.0233539	0.0554353	0.0061869	0	0	0	0.0229299	0
VPS11	0.0317801	268	0.294745	0.0367721	0	0	0.0195946	0	0	0	0	0.0323596	0.0231544	0.032433	0.0373627	0.0288393	0.0299686	0.0503519	0.0424316	0.0253382	0.0334128	0.027161	0.0394605	0	0	0.267144	0	0.0286476	0	0.0331049	0.046979	0.0236836	0.0394936	0.0365013	0.027173	0.0288409	0.0320903	0.0219305	0.0271803	0.0128009	0.13549	0	0.053699	0.0322437	0	0	0	0.0464406	0
VPS18	0.0162037	382	0.292769	0.0310291	0.0618247	0.0330752	0.064819	0	0	0	0.149594	0.017092	0.0567142	0.0190149	0.0290905	0.0114068	0.0174068	0.0409887	0.00591508	0	0	0.0187943	0.00614828	0	0	0	0	0.011245	0	0.01415	0.0269782	0.0067147	0.0459806	0.0514257	0	0.0115577	0.00872173	0.03834	0.00747195	0.0139133	0	0	0.00979517	0	0	0	0	0	0
VPS41	0.0523892	169	0.656836	0.0572044	0.0619398	0.0423435	0.0932392	0.298926	0	0.255882	0.172244	0.0423549	0.0505215	0.0367058	0.0294956	0.0275404	0.0324898	0.0183168	0.0320817	0.0269676	0.0210442	0.0190332	0.0458895	0.0731994	0	0	0	0.0289874	0.0409454	0	0.0972993	0.0673916	0.0411561	0.113946	0.0406124	0.0631105	0.0924065	0.0918725	0.0489777	0.0767327	0	0	0.0304905	0.0119898	0	0	0	0	0
VPS8	0.0314211	269	0.257769	0.0371008	0.125333	0.0419267	0.0814437	0.107656	0	0	0.155563	0.00737657	0.0189455	0.0171782	0.00830925	0.0137935	0.0331054	0.0148413	0.0102882	0.0583308	0.0252603	0.00855918	0.0117411	0.0210241	0	0	0	0.0103475	0	0.0204672	0.0613424	0.0230615	0.0145358	0.0667382	0.0132254	0.0302081	0.0158413	0.0198729	0.0356591	0.0254156	0	0.0264712	0.0230007	0.0208018	0.0482902	0	0	0	0
WDSUB1	0.0296232	284	0.533051	0.0299583	0.0570977	0.135598	0.0546215	0	0.263696	0	0	0.0551778	0.087285	0.0363924	0.014095	0.0321394	0.0604585	0	0.0564468	0	0.0221318	0.0757278	0.010779	0.13634	0	0	0.0970066	0.0172293	0.105121	0.0160778	0.0294224	0.0202493	0.0221769	0.0533495	0.0426762	0.0172179	0.038205	0.0377661	0.02684	0	0	0	0	0	0	0	0	0	0
WHSC1	0.0271844	293	0.634908	0.0603049	0.0619398	0.107063	0.041856	0	0.283094	0.13389	0	0.0108445	0.0114759	0.00586324	0.00988493	0.00578861	0	0.0152215	0.00572138	0.0137909	0	0.0139885	0.0298827	0.0189314	0.0966697	0	0	0.0331461	0.112657	0.0344919	0.028929	0.0188477	0.0293259	0.0436916	0.0137016	0.0146054	0.0168893	0.0431278	0.0188721	0	0	0.057523	0.0116324	0.00719571	0.0607716	0	0	0	0
WSB1	0.489601	3	1.77771	0.336055	0.423199	0.319669	0.713941	0.317447	0.683013	0.290404	0.529869	0.327805	0.321418	0.295288	0.846942	0.385354	0.546896	0.382451	0.2284	0.677869	0.256717	0.193883	0.644219	0.341238	0.451233	0	0.104791	0.53011	0.496527	0.407817	0.592351	0.532998	0.761767	0.632314	0.594801	0.58801	0.608047	0.740637	0.686025	0.369693	0.674431	0.4609	0.700512	0.0644572	0.33965	0	0.654698	0.178595	0.256293
WSB2	0.0776246	98	0.753079	0.148862	0.0438423	0.0852147	0.129622	0.107656	0.27832	0.265999	0.155563	0.0634446	0.0591067	0.0309029	0.0409565	0.0519916	0.0643238	0	0.0329327	0.0753155	0.0248418	0.0292217	0.0402576	0.026328	0.0984847	0	0	0.101628	0.753079	0.0744502	0.177967	0.137225	0.179318	0.191573	0.100816	0.104489	0.102331	0.0976484	0.151967	0.232999	0	0.396708	0.128388	0.0128145	0.0173611	0	0	0.115319	0
WWP1	0.0628516	135	0.545789	0.266051	0.545789	0.15716	0.421273	0.211559	0.141137	0.408917	0.518031	0.0173619	0.015768	0.0195893	0.0424281	0.0126933	0	0.063687	0.0194722	0.162819	0.0367728	0.0193185	0.18808	0.0432315	0	0	0	0.167656	0.204849	0.0969256	0.0848713	0.0627842	0.0857656	0.0971847	0.0757123	0.0848175	0.18524	0.0390288	0.0698368	0.0387356	0	0.253182	0.04212	0.0317207	0	0	0.24998	0.0232789	0.219744
WWP2	0.0415793	222	0.721705	0.0347673	0.0661997	0	0.0604557	0	0	0	0.32058	0.0504214	0.0251008	0.0423114	0.0474151	0.0231332	0.0260994	0	0.0289764	0.0513185	0.0102643	0.0349218	0.0321582	0.13171	0	0	0	0.0341455	0	0.0516774	0.0535508	0.0408301	0.125194	0.0366923	0.0781095	0.0430623	0.0638707	0.0337931	0.0464444	0.10727	0	0.0332287	0.0348118	0.0289143	0.0895858	0	0	0.0646355	0
XIAP	0.108875	53	0.690405	0.121258	0	0.142939	0.0705492	0.103384	0.136559	0.2683	0	0.0638581	0.114695	0.0620498	0.0952406	0.0868848	0.0299014	0.177986	0.0561814	0.185633	0.0758525	0.0809448	0.127028	0.0415454	0	0	0.289865	0.22424	0.207056	0.0467515	0.17211	0.133761	0.236234	0.277693	0.136389	0.124168	0.180133	0.289412	0.116599	0.198819	0.236117	0.362633	0.153485	0.0463788	0.143362	0	0	0.134385	0
ZBTB1	0.0697783	113	0.543016	0.0906865	0.111866	0.227734	0.0873304	0.22067	0	0	0.149594	0.0485569	0.102667	0.116198	0.0879433	0.116753	0	0.067515	0.0102991	0.0321466	0.0611138	0.0109071	0.0286556	0.0191439	0.0936345	0	0	0.144828	0	0.100954	0.201816	0.091313	0.138483	0.164206	0.096684	0.0697432	0.095815	0.276307	0.116456	0.083046	0.143098	0.0833836	0.1681	0.0278393	0.180648	0.141733	0.0847093	0.059464	0
ZBTB10	0.0753682	103	0.543016	0.070931	0.176293	0.099903	0.0458165	0.0949978	0	0	0.155563	0.0288405	0.0139111	0.00951924	0.0226636	0.0194752	0	0.0630705	0.0159654	0.0468798	0.00824824	0.0121348	0.0943431	0.0244054	0.0976927	0	0	0.20074	0	0.184166	0.218705	0.15089	0.0616714	0.124018	0.149352	0.139534	0.18883	0.227485	0.200972	0.206094	0.141263	0.0548708	0.190236	0.013627	0	0.353587	0	0.0623649	0.164458
ZBTB11	0.065787	127	0.374656	0.0430224	0.0645806	0.0293503	0.0843089	0.100179	0	0	0	0.0322392	0.0359885	0.0330339	0.058246	0.0389672	0.0309833	0	0.01638	0.0877414	0.0264108	0.0155985	0.0481119	0.0251251	0	0	0	0.184364	0.265437	0.121963	0.115602	0.100299	0.132942	0.110196	0.155483	0.136767	0.16863	0.0727727	0.183535	0.131665	0.115908	0.0838904	0.0453754	0.0354692	0	0	0	0	0.211773
ZBTB14	0.0150522	391	0.188179	0.0305003	0	0	0.0232112	0	0	0	0	0.00995213	0	0.00695146	0.013864	0.00610631	0	0.0190455	0.00717184	0.0375981	0.0213621	0	0.0162373	0.0191439	0	0	0	0.0123922	0	0	0.0165824	0.0219469	0.0134951	0	0	0.0126091	0.0230585	0	0.0171721	0.0452968	0	0	0	0	0	0	0	0	0
ZBTB16	0.0664908	124	0.536695	0.187693	0.131596	0.0279462	0.0553426	0	0	0	0	0.0541476	0.0103409	0.0345335	0.0263946	0	0.0647839	0.0171857	0.0668206	0.166454	0.0590107	0.114588	0.171572	0.257835	0.102042	0.308395	0	0.0744378	0	0.0394026	0.0904563	0.242442	0.0340696	0.0637548	0.222239	0.194692	0.146195	0.192138	0.106664	0.121349	0.307854	0.0294659	0.206528	0	0.0342388	0	0	0	0
ZBTB17	0.0225697	322	0.378876	0.00578245	0	0.038121	0.0141783	0.104555	0	0	0	0.0222216	0.0489738	0.0559495	0.0491456	0.0614626	0.0802539	0.0826115	0.0186819	0.030643	0.00907446	0.0188542	0.0141907	0	0.0793142	0	0	0.0608259	0.0657148	0.0280055	0.0178655	0.0175311	0.048612	0.0100794	0.013551	0.0169398	0.0223856	0.0461618	0.0287018	0.0243613	0	0	0.0224095	0.0233046	0.157339	0	0	0.0396567	0
ZBTB18	0.0240868	310	0.497677	0.0153113	0.0618247	0.0384011	0.023503	0	0	0	0	0	0.0055801	0.00804897	0.00359545	0.00703176	0	0	0	0.0134325	0	0.00498443	0.0271778	0	0	0	0	0.0974313	0.0811012	0	0.015514	0.0099739	0.037381	0.0335416	0.0532969	0.0203982	0.0516457	0.0202435	0.0477313	0	0	0.0290436	0.0113513	0.0125883	0	0	0	0.0391394	0
ZBTB2	0.0538392	166	0.634908	0.0508272	0.0593925	0.206509	0.0714324	0.292067	0.278178	0	0	0.0547635	0.017276	0.0229579	0.0342993	0.0173807	0.0352633	0.0183802	0.0152377	0.013576	0.0100295	0.0133344	0.0369477	0	0	0.26653	0	0.168231	0.207706	0.0309139	0.196621	0.168587	0.119302	0.117394	0.13701	0.287729	0.194485	0.157729	0.127649	0.179966	0.247342	0.180037	0.234922	0	0	0	0	0	0
ZBTB20	0.147263	32	0.716241	0.0422782	0	0	0.0187036	0	0.13854	0	0.171226	0.0860175	0.019262	0.0245152	0.0548004	0.0185381	0	0	0.119848	0.262327	0.0638125	0.105548	0.109526	0.0906158	0.100351	0	0.195943	0.14917	0.135831	0.196266	0.12562	0.455985	0.0797588	0.0852552	0.251033	0.431308	0.211963	0.370606	0.232639	0.330412	0.430024	0.236262	0.281275	0.0805312	0.193519	0	0	0	0
ZBTB21	0.0940794	63	0.909454	0.0585217	0	0.080374	0.0736553	0.107656	0	0	0	0.216677	0.0352181	0.0490593	0.0590339	0.0615821	0.0292863	0.0449132	0.0592339	0.0122948	0.0385975	0.0935975	0.0384955	0.0165031	0	0	0	0.342183	0.352924	0.198479	0.150638	0.183693	0.130685	0.209298	0.223993	0.245134	0.1746	0.252328	0.678616	0.208419	0.184895	0.909454	0.183326	0.0204954	0.0947347	0	0	0.021894	0
ZBTB22	0.0156175	385	0.462387	0.0155052	0	0	0.0265031	0.106438	0.146421	0.135381	0	0.0194217	0.00562545	0.00578126	0.00480209	0.00649422	0	0	0.00782803	0.0106668	0.0238816	0.0234309	0.0274645	0.0245339	0	0	0	0.0086565	0	0	0.0122315	0.00910278	0.0192929	0.0297682	0.0279616	0.0154328	0.0320686	0.0162044	0.00929532	0.0352396	0	0	0.0139679	0.0199656	0	0	0.0587293	0	0
ZBTB24	0.012246	412	0.229503	0	0	0.0831236	0.00916978	0	0	0	0	0.00328767	0.00824777	0.00874792	0	0.00474828	0	0	0	0	0	0.00147235	0.00312492	0.0499388	0	0	0	0.0146814	0	0	0.00543797	0.00937263	0.00740607	0.0299496	0	0.0199192	0.0243893	0.0271211	0.0220364	0.0238166	0	0	0	0	0	0	0	0	0
ZBTB25	0.023113	318	0.590448	0.0512108	0.0640993	0	0.0647736	0.216612	0	0.136193	0	0.0200311	0.0251594	0.0296859	0.0178543	0.019925	0	0	0.00298543	0.020613	0.0319767	0.0260807	0.0147013	0	0	0	0	0.0253915	0.0657148	0.0343504	0.0380545	0.0402445	0.0424654	0.0496643	0.0395301	0.0266173	0.045752	0.0201698	0.0208724	0.0138062	0	0	0.0770557	0.01275	0.157891	0	0	0	0
ZBTB26	0.0093618	426	0.19911	0.00740615	0.063546	0	0.013864	0	0	0	0	0.00715043	0.00303885	0.00911082	0.00499811	0	0	0	0.00548083	0.0128122	0.0129428	0.00635677	0.00506603	0	0	0	0	0.0100255	0.0637021	0	0.00812518	0.0115603	0.0181964	0.0101319	0	0.016657	0.00874719	0	0.00904156	0	0	0.0283006	0	0	0	0	0	0	0
ZBTB3	0.00468344	476	0.194226	0	0	0.0254808	0.00916649	0	0	0	0	0.00281243	0	0.00176286	0	0.00707226	0	0	0	0	0	0.00220156	0.00261737	0	0	0	0	0.00193534	0	0	0.00558103	0.00323923	0	0	0	0.00486784	0.00915783	0	0	0.0131295	0	0	0	0	0	0	0	0	0
ZBTB33	0.0297727	281	0.659402	0.0151694	0	0.0806858	0.0127753	0.111631	0	0	0	0.00356521	0.021997	0.0129728	0.00486033	0.00555608	0	0.0140101	0.0133405	0.0246791	0.0377669	0.0051388	0.0280152	0	0	0	0	0.102149	0.0564435	0.0464625	0.0489166	0.0338913	0.0731356	0.0330412	0.014329	0.0379187	0.0305955	0.103682	0.0555436	0.0268654	0	0.060869	0.0238347	0	0	0	0	0	0
ZBTB37	0.0135614	402	0.219343	0.0432121	0	0.0279462	0.0717671	0	0.140118	0	0.149594	0	0.00333157	0.0028234	0.0173761	0.00962362	0	0	0.0074028	0.00999934	0.0131919	0.00519075	0.00613235	0.0252494	0	0	0	0.00352052	0	0	0.0144746	0.021405	0.0140479	0.051025	0	0.0207247	0.00417046	0	0.0106435	0.0266655	0	0	0.0102154	0	0	0	0	0	0
ZBTB38	0.129034	43	0.632694	0.115066	0.190198	0.0431577	0.0999789	0.107656	0	0	0.16542	0.0853604	0.0414267	0.0556121	0.0680573	0.0395505	0.0581992	0.0676866	0.0740578	0.129405	0.082703	0.049906	0.0833875	0.0565026	0	0	0.0900652	0.166167	0.0896187	0.632694	0.145014	0.174671	0.255088	0.208725	0.335669	0.113171	0.251086	0.173443	0.0850193	0.301811	0.263685	0.0944986	0.231563	0.12519	0.100109	0	0.0749015	0.213892	0
ZBTB39	0.00589605	460	0.101168	0.00750302	0.0438423	0	0.0223192	0	0	0	0	0	0	0.00202718	0	0	0	0	0	0.026277	0	0.00338436	0.0250913	0	0	0	0	0.0106355	0	0.0180603	0.00566264	0.00498765	0	0.0107789	0	0.00327045	0.0171975	0	0.00985557	0	0	0	0	0	0	0	0	0	0
ZBTB4	0.0801667	88	0.627541	0.0878698	0.127644	0.0756689	0.150892	0.106438	0	0.262966	0	0.0406895	0.00579594	0.0258037	0.00529906	0.0151151	0	0	0.0645984	0.0982626	0.0533399	0.0612787	0.0607797	0.0696968	0	0	0.10229	0.146235	0.114225	0.0563769	0.115666	0.145451	0.211685	0.123225	0.099317	0.132953	0.125839	0.151564	0.130028	0.189037	0.353874	0.107334	0.137242	0	0	0	0	0	0
ZBTB40	0.0146209	394	0.52118	0.0151927	0	0.0271661	0.0128698	0.104555	0	0	0	0.0177604	0.0156911	0.0226104	0.00951485	0.0179964	0	0	0.00475972	0.0112422	0	0.0067173	0.0188007	0.025579	0	0	0	0.0285757	0	0.0937392	0.0340921	0.0199728	0.0391051	0.0392742	0.0121486	0.0200214	0.0182238	0.042589	0.0450684	0.0138441	0	0.0980827	0.0342009	0	0	0	0	0	0
ZBTB41	0.0218453	332	0.668177	0.0144012	0	0	0.0335896	0.204673	0	0.139519	0	0	0.00798793	0.00565834	0	0	0	0	0.00375624	0.0196903	0	0.00699397	0.0116825	0.0517119	0	0	0	0.0289111	0.0517958	0	0.0142108	0.0525344	0.0140831	0	0.0698614	0.038958	0.0333238	0.0408683	0.0195514	0.0507191	0.190988	0.0290436	0.0213984	0	0	0	0	0	0
ZBTB43	0.0511022	176	0.601946	0.0228637	0	0.0712857	0.0512175	0.108523	0	0	0.32919	0.0496346	0.0903912	0.0565685	0.0350277	0.106277	0.11085	0.0274896	0.0178931	0	0	0.0207165	0.0343447	0	0.0793142	0	0	0.0706517	0.144803	0.11169	0.123998	0.0523577	0.203862	0.175172	0.0735485	0.0648022	0.0531187	0.0918001	0.185113	0.0795142	0.074137	0.2006	0.0827428	0.00700334	0.0330913	0	0	0	0
ZBTB44	0.0924126	67	0.672458	0.0651405	0.0454023	0.0943722	0.0874639	0.107734	0	0.394721	0	0.0257204	0.0318268	0.0121209	0.0369238	0.0121165	0	0.0336494	0.0366359	0.0928474	0	0.0226587	0.099432	0.036444	0.206078	0	0	0.122145	0.118365	0.142435	0.102268	0.146123	0.0551309	0.124817	0.0406705	0.179391	0.147946	0.0830056	0.198028	0.0755079	0.438651	0.198018	0.170507	0.027756	0.060534	0	0	0.0279196	0
ZBTB45	0.0113201	417	0.302968	0	0	0.0787634	0.00867304	0	0	0	0	0.0107808	0.0153889	0.00748419	0.00447355	0	0.0301388	0.0169276	0.0103579	0	0.012057	0.00452866	0.00260873	0.0135529	0	0	0	0.0175173	0	0	0.00655183	0.00507602	0.0119022	0.0407442	0	0.0111069	0.00369193	0.0210802	0	0	0	0.0273856	0.0311603	0	0	0	0	0	0
ZBTB48	0.0147154	392	0.288754	0.0269402	0.0438423	0.0668248	0.037522	0	0	0	0	0.0276692	0.0106114	0.0238558	0.00912641	0.0445936	0	0.0317473	0.0150916	0.0199977	0.0319224	0.0246726	0.00509038	0.0220184	0	0	0	0.00937168	0	0	0.0152877	0.0118739	0.0141731	0.0174525	0.0271466	0.0142805	0.0168735	0	0.0073374	0.0139133	0.0568133	0	0	0.0328255	0	0	0	0	0
ZBTB49	0.00793641	441	0.300909	0.014298	0	0	0.0186507	0	0	0	0	0.00653723	0.00597001	0.0108345	0	0	0	0.0196089	0.00882395	0	0.00934619	0.00365236	0.0089136	0	0	0.300909	0.100777	0.0097441	0.0542831	0	0.0158499	0.00209999	0.00797125	0.0200797	0	0.00189654	0.0157244	0	0	0.0121919	0	0	0	0	0	0	0	0	0
ZBTB5	0.0163706	381	0.200176	0.0151171	0	0	0.0180231	0	0	0.139519	0	0.0101689	0.008577	0.00575011	0.0383378	0.00960255	0	0	0.00281794	0.0123396	0	0.0102473	0.0232259	0	0	0	0	0.068904	0	0	0.0212948	0.0143921	0	0.0093921	0	0.00961036	0.0264898	0.0399966	0.018365	0.0405491	0	0.0490331	0.0239367	0	0	0	0	0	0
ZBTB6	0.0183121	363	0.190407	0.0139491	0.063546	0.0427438	0.0310413	0	0	0	0	0.0121307	0.00874155	0.00797198	0.0151049	0.0126325	0	0.0170451	0	0	0.0110176	0.00200966	0.0198574	0	0	0	0.10229	0.0226572	0.0409454	0.0318697	0.020254	0.0103667	0.0362522	0.0236508	0.0673562	0.030601	0.0226033	0.019676	0.00927472	0.0250845	0	0	0.0413028	0	0	0	0	0	0
ZBTB7A	0.0851336	79	0.634908	0.0782367	0.124752	0.196715	0.0846596	0.10958	0	0.136193	0	0.0235988	0.0282892	0.0187277	0.0794137	0.0553111	0.0516359	0.0161722	0.0371044	0.117929	0.0320866	0.0282962	0.0575018	0.0700984	0	0	0	0.135925	0.37208	0.0167444	0.130532	0.1091	0.183539	0.245937	0.0612587	0.09224	0.126773	0.159513	0.183271	0.104284	0.0670315	0.117995	0.102078	0.0217912	0.0236875	0	0	0.171362	0
ZBTB7B	0.0334803	255	0.5854	0.00758885	0	0.0776525	0.0546344	0.105919	0.229209	0.14293	0.16542	0.048337	0.0299862	0.0253259	0.0191294	0.0359864	0.0314459	0.0165993	0.0364134	0	0.0424295	0.0285878	0.0159101	0.0198508	0	0	0	0.00653909	0.0378708	0	0.0199028	0.0110573	0.0535975	0.0151315	0	0.0173583	0.0138311	0.0361321	0.00961741	0	0	0	0.0241047	0.0135524	0.0351634	0.347841	0.120466	0.0656461	0
ZBTB8A	0.0233927	316	0.18189	0.0151466	0.0645806	0	0.00977085	0	0	0	0	0.00409438	0	0.00317903	0.00459028	0	0.033942	0	0.0141704	0.0736442	0.0125052	0.00874736	0.107825	0.0220184	0.161817	0	0	0.0413406	0	0	0.0176273	0.055188	0.0123301	0.0473759	0.0307612	0.0411991	0.0852759	0.0173833	0.0336385	0.0863388	0.074532	0.0542122	0	0	0	0	0	0	0
ZFAND3	0.082919	83	0.820886	0.148642	0.0570977	0.102595	0.084787	0.0949978	0	0	0	0.0874877	0.0529601	0.0561248	0.108319	0.129094	0.0598624	0.104166	0.0553943	0.0350154	0.0125131	0.0460034	0.0680409	0.0630783	0	0.291309	0	0.131291	0.28471	0.0737632	0.11852	0.0807698	0.0965502	0.139985	0.167753	0.0791857	0.0597384	0.130605	0.095719	0.0838055	0.0601759	0.145903	0.138403	0.0336329	0.0844035	0	0.140829	0.167392	0
ZFAND5	0.556938	2	1.5441	0.509414	0.741199	0.589757	0.725496	0.959761	0.253896	0.253966	1.03944	0.565395	0.389913	0.338738	0.466465	0.338426	0.271716	0.205831	0.151005	0.26076	0.241305	0.276166	0.293631	0.188077	0	0.239393	0	1.2963	0.808666	1.00127	1.04379	1.01436	0.585495	1.02961	0.990337	1.41216	0.820112	1.18795	1.45221	0.942062	0.772861	1.26989	1.11482	0.1113	0.148867	0.348876	0.402619	0.095766	0
ZFAND6	0.206321	18	0.962564	0.124881	0.295872	0.293928	0.181236	0.391563	0.13854	0.138155	0	0.29035	0.325582	0.260692	0.151811	0.251896	0.284218	0.290732	0.246916	0.157128	0.194658	0.322618	0.112628	0.242645	0.193566	0	0.0976626	0.153824	0.372932	0.155334	0.224522	0.113999	0.242374	0.277748	0.185192	0.121582	0.157783	0.147599	0.0916648	0.125229	0.0573981	0.390775	0.0681028	0.109608	0.186989	0.194085	0.424073	0.229041	0.256293
ZFPL1	0.0467178	194	0.677607	0.0186912	0.0438423	0	0.0226384	0	0	0	0	0.0899712	0.0513267	0.0448988	0.0413943	0.0177075	0.127745	0.0188748	0.0710901	0.0704312	0.0813512	0.0808545	0.0289986	0.08623	0.203736	0	0.199118	0.0258599	0.0517958	0	0.035554	0.0351242	0.00574246	0.0392296	0.0165105	0.0330221	0.0294658	0	0.0147772	0.0243544	0	0	0.0203232	0.0139118	0.0352952	0	0.130196	0.173307	0.213961
ZNF131	0.070056	112	0.453484	0.0516007	0.0656757	0.122079	0.0786317	0	0	0	0.155563	0.0448119	0.0283921	0.0498907	0.0906184	0.0575748	0.0301388	0.062063	0.047551	0.0530371	0.0626038	0.049202	0.0885591	0.0167441	0.0793142	0	0	0.147979	0.177333	0.0941319	0.0803772	0.0683664	0.0437417	0.0765127	0.111729	0.0793144	0.121208	0.122353	0.127697	0.0725915	0	0.0898817	0.163952	0.0350123	0.0920031	0	0	0.0605832	0
ZNF598	0.0223477	324	0.347043	0.00693111	0	0.0431577	0.0045582	0	0	0.131959	0	0.00450793	0.0266072	0.0177028	0.0275768	0.024411	0	0	0.00409658	0.0370336	0.0110495	0.0091748	0.0217218	0	0	0	0	0.0488122	0.0378708	0.0184355	0.0280567	0.0167908	0.0556754	0.0549459	0.0234086	0.00988912	0.0593937	0.0403276	0.025909	0.0263605	0	0	0.0122132	0.0273544	0.0310661	0	0	0.0473589	0
ZNRF1	0.0226951	321	0.306303	0.00699685	0.058446	0.0293503	0.0249738	0	0	0	0	0	0.0213071	0.00302448	0.00492758	0.00720979	0.0301388	0	0.0198767	0.025923	0	0.010905	0.0384253	0.0213675	0	0	0	0.147666	0	0.036811	0.0214909	0.0147106	0.0312147	0.0379475	0.025801	0.0124743	0.04084	0.0505654	0.0550045	0.0212236	0	0.0280934	0.0338217	0	0	0	0	0.0752923	0
ZNRF2	0.0344304	249	0.347043	0.0509482	0.0661997	0.0768024	0.101345	0.207551	0	0	0	0.0111384	0.0286538	0.0138904	0.00912687	0.0249375	0	0.0330998	0.00883686	0.00964607	0.0110495	0.00218459	0.0146454	0.0186077	0.0696838	0	0	0.0543174	0.215721	0.100141	0.181806	0.0281039	0.290529	0.184066	0.057176	0.0221925	0.0479387	0.0765616	0.107139	0.0328276	0	0.0559376	0.124156	0.0146344	0	0	0	0.0365828	0
ABTB2	0.0249006	305	0.332178	0	0	0	0	0	0	0	0	0.0144207	0.0142057	0.00898095	0.0115551	0.0164204	0.0203179	0.0329635	0.0032208	0	0	0.00362425	0.00310437	0	0	0	0	0.0152251	0.0608615	0.0221392	0.0715653	0.054721	0.126627	0.0396638	0	0.0209558	0.00459623	0.0187411	0.153843	0.0584816	0	0.0467266	0.0223545	0	0	0	0	0	0
ASB2	0.00655736	454	0.557839	0	0	0	0	0	0	0	0	0	0.00293179	0.00801102	0.00405853	0.0118813	0	0.0159995	0	0	0	0	0	0	0	0.557839	0	0	0	0	0	0	0	0	0	0	0	0	0	0	0	0	0	0.0360948	0.161655	0	0.283207	0	0
ASB4	0.00373535	491	0.143659	0	0	0	0	0	0	0	0	0.102271	0.0250531	0.0654775	0.0434228	0.0427116	0.143659	0.0153478	0.130402	0.0541756	0.126735	0.14346	0.0294362	0.0248319	0	0	0.0983335	0	0	0	0	0	0	0	0	0	0	0	0	0	0	0	0	0	0	0	0	0	0
ASB9	0.00574915	464	0.362959	0	0	0	0	0	0	0	0	0.00296146	0	0	0.0105031	0	0	0	0.00176921	0.0216416	0	0.00191897	0.0330813	0	0	0	0.1018	0.0188854	0.0542831	0	0.00519842	0.00129406	0	0	0	0.00495269	0.0405086	0	0	0.0140312	0	0	0	0	0	0	0	0	0
BACH2	0.0191002	356	0.355433	0	0	0	0	0	0	0	0	0.00694503	0.00224813	0.00982282	0.00398141	0	0	0	0	0.0250851	0	0	0.00930608	0	0	0	0	0.0235681	0	0.0191709	0.0194827	0.0345885	0.00509955	0.0113363	0.0264273	0.020289	0.0135523	0.0206257	0.0636193	0.0255033	0	0.0823131	0.12995	0	0	0	0	0	0
BCL6B	0.024085	311	0.518646	0	0	0	0	0	0	0	0	0	0.0030462	0.00185654	0.101777	0	0	0.0182292	0.00754661	0.124008	0	0.00499451	0.190187	0.026328	0	0	0	0.340318	0.0806845	0.0126084	0.0250156	0.0294715	0.00836329	0.0132024	0.0390463	0.0228964	0.284177	0.0172249	0.0300457	0.0355499	0	0	0.013294	0	0	0	0	0	0
BRCA1	0.00904171	430	0.590448	0	0	0	0	0	0	0	0	0.00519779	0.00269163	0.00298039	0	0	0	0	0	0.0243064	0	0.00157963	0.0111187	0.0242167	0	0	0	0.00411839	0	0	0.00185862	0.0155614	0	0	0	0.00753648	0.00822134	0	0	0	0	0	0.026441	0	0	0	0	0	0
BTBD11	0.00314224	498	0.600713	0	0	0	0	0	0	0	0	0	0	0.0017565	0.00375942	0	0	0	0	0	0	0	0	0	0	0	0	0.0038815	0	0	0.00960465	0.0037367	0	0.0108042	0.0141472	0.00162041	0	0	0	0	0	0	0.0501469	0	0	0	0	0	0
BTBD8	0.00614241	457	0.181491	0	0	0	0	0	0	0	0	0	0	0.00266444	0	0	0	0	0	0	0.0110495	0.00194094	0.00567998	0	0	0	0	0	0	0	0.00850396	0.0181013	0.00653928	0	0.0142787	0.0151207	0.00300865	0	0	0.0123493	0	0	0.0242009	0	0	0	0	0	0
CCNF	0.00261224	505	0.251674	0	0	0	0	0	0	0	0	0	0.00325914	0.0052611	0.00340329	0	0	0	0	0	0	0	0.0031694	0	0	0	0	0.00228745	0	0	0.00181954	0.000848629	0	0.0132981	0	0.00147527	0	0	0	0	0	0.0286265	0	0	0	0	0	0	0
DTX4	0.0147102	393	0.418238	0	0	0	0	0	0	0	0	0	0.00997627	0	0.00499125	0	0	0.016377	0.0058889	0.0120364	0	0.00181361	0.0190475	0	0	0	0	0.0197229	0.0466738	0	0.00583163	0.00205661	0.0129324	0.0250916	0.0157746	0.012594	0.0124227	0	0.0289696	0.0271729	0.178853	0	0	0.00747661	0	0	0	0	0
ENC1	0.0327513	259	0.487325	0	0	0	0	0	0	0	0	0.00799411	0.00288884	0.0339355	0.0193357	0	0.0299518	0	0.00546801	0.0155014	0	0.00147235	0.0280794	0.0235222	0	0	0	0.0082687	0.0806845	0.0636163	0.0381331	0.0725073	0.0205377	0.0213703	0.0118052	0.0471433	0.0262832	0.054972	0.0949813	0.0766622	0	0	0.070042	0.00483021	0.0173611	0	0	0.0350996	0
FBXL13	0.00568629	466	0.252399	0	0	0	0	0	0	0	0	0	0.00557286	0	0	0.00641907	0.0352633	0	0	0	0	0.00170474	0.00349124	0.0995346	0	0	0	0	0	0	0.00186302	0.00528717	0	0	0.0794502	0	0.00438156	0	0	0.0221352	0	0	0	0	0	0	0	0	0
FBXL18	0.0040187	484	0.291103	0	0	0	0	0	0	0	0	0.00513197	0.00426923	0.0017565	0	0	0	0	0.00275347	0	0	0.00189158	0.00264829	0	0	0	0	0	0	0	0	0.00546226	0	0	0	0.00145284	0.00991188	0	0	0.0118846	0	0	0	0	0	0	0	0	0
FBXL2	0.00876425	433	0.474727	0	0	0	0	0	0	0	0	0.0162444	0	0	0.00407629	0.0126151	0	0	0.0104049	0.0101108	0	0.0180914	0.00788109	0	0.05764	0	0	0.00419065	0.0637021	0	0.0103391	0.0170852	0	0.0083304	0.0154583	0.0098885	0.0212201	0.0195703	0.0288659	0.0239798	0	0	0.047505	0	0	0	0	0	0
FBXL8	0.00284673	503	0.0935295	0	0	0	0	0	0	0	0	0.00403294	0	0.00818306	0.00534633	0	0	0	0.00297236	0	0	0.00119375	0	0.0247312	0	0	0	0.00399636	0	0	0.00349296	0.00321696	0	0	0	0.0045212	0.00361059	0	0	0	0	0	0.0103298	0	0	0	0	0	0
FBXO10	0.00518014	471	0.0978532	0	0	0	0	0	0	0	0	0.00423064	0	0	0.00483552	0	0	0	0	0	0	0	0	0	0	0	0	0	0	0.0320175	0.00665592	0.00797866	0.00637861	0	0	0.00140238	0.00860443	0.019364	0	0	0	0	0	0	0	0	0	0	0
FBXO15	0.0023959	507	0.274828	0	0	0	0	0	0	0	0	0	0.0023827	0	0	0.00696278	0	0	0.00319667	0	0	0.00129894	0.00303492	0	0	0	0	0	0	0	0	0.0010523	0	0.0110996	0.0293591	0.00332286	0	0	0	0	0	0	0	0	0	0	0	0	0
FBXO16	0.00538907	469	0.668177	0	0	0	0	0	0	0	0	0	0	0	0	0	0.0982155	0	0.00552829	0	0	0.00491716	0	0	0	0	0	0	0	0.0172459	0.00148932	0.00129921	0	0	0	0	0	0	0	0	0	0	0	0	0	0	0	0	0
FBXO2	0.0213624	337	0.484887	0	0	0	0	0	0	0	0	0.328852	0.024945	0.0845138	0.0460482	0.0778141	0.0627304	0	0.26961	0.0133137	0.190616	0.271091	0.038797	0.107474	0.165055	0	0.288387	0	0	0	0.00220054	0.0104816	0.00791756	0	0	0.00755113	0.00912139	0.0204263	0	0	0.197012	0.0296487	0.0123354	0.0132638	0.0222781	0	0	0	0
FBXO27	0.00375495	489	0.0733566	0	0	0	0	0	0	0	0	0	0	0	0.00536833	0	0.0329651	0	0	0	0.0098134	0	0	0	0	0	0	0	0	0	0.00538149	0.0162539	0.00849836	0	0.0170827	0.00464442	0.00361632	0	0.00972947	0	0	0	0	0	0	0	0	0	0
FBXO5	0.0222673	326	0.491252	0	0	0	0	0	0	0	0	0.0117445	0.0077922	0.0305781	0.00903813	0	0.0299014	0.014727	0.013377	0.0104865	0.012128	0.00167995	0.0217247	0	0.05764	0	0	0.0316962	0.0645186	0.0674435	0.0201156	0.0209574	0.0132	0.0569517	0.0332342	0.0336036	0.0296246	0.0382201	0.0467974	0	0.0572667	0.0491709	0.0321063	0	0.0352159	0	0.094556	0	0
HECW2	0.0241226	308	0.399238	0	0	0	0	0	0	0	0	0	0.0020218	0	0.0649459	0.00959642	0	0	0.00637162	0.0420876	0.022874	0.00505666	0.235036	0.0530128	0.158278	0	0	0.172329	0	0.018992	0.0159455	0.0207084	0	0	0.0135369	0.0170588	0.0936651	0.0195039	0.0302287	0.0866544	0	0.0298931	0	0	0	0	0	0	0
HERC6	0.0151453	389	0.368601	0	0	0	0	0	0	0	0	0.0110429	0.00290136	0.00584203	0.0215903	0.0110374	0	0	0	0.0138691	0	0.0101498	0.0121987	0	0	0	0	0.0273968	0	0	0.0213256	0.0160701	0.00847281	0.0222487	0.0140039	0.0209677	0.0227017	0.0196181	0.00832091	0.0244405	0.0776885	0.0334772	0.0109115	0	0	0	0	0	0
HIC2	0.00854032	435	0.226812	0	0	0	0	0	0	0	0	0.00342037	0.00604505	0.00629194	0	0	0	0.017055	0	0	0	0.00212862	0.00661671	0	0	0	0	0.00956257	0	0.0187413	0.0130067	0.0151726	0.00710628	0.0184897	0.0152558	0.0345246	0.00924393	0.0422218	0.0280277	0	0	0.0296771	0	0.00722049	0.0268515	0	0	0	0
IPP	0.0131264	404	0.274723	0	0	0	0	0	0	0	0	0.0190159	0.00646813	0.0114301	0.00907217	0	0.0322716	0	0.0165396	0	0.0246163	0.0124466	0.00316151	0	0	0	0	0.00201047	0	0.0221392	0.00321451	0.0162508	0.0152359	0	0.00948261	0.0134758	0.00325821	0.0222694	0.0103762	0.0117162	0.0795481	0.0329662	0	0.00771399	0.0281745	0	0	0	0
KBTBD11	0.0218645	331	0.302968	0	0	0	0	0	0	0	0	0.00508516	0.0031053	0	0.0139961	0.0115814	0	0.0116483	0.0138835	0	0	0.00886606	0.00590327	0	0.149754	0	0	0.0128439	0	0.0210141	0.0259248	0.0251001	0.0382636	0	0	0.0276831	0.0179184	0	0.0155001	0.01065	0.063336	0	0	0	0	0	0	0	0
KCNA3	0.00297055	499	0.160125	0	0	0	0	0	0	0	0	0	0.010793	0.0115455	0	0.00701181	0	0.0145001	0	0	0	0	0	0	0	0	0	0.00589116	0	0	0.0118961	0	0.0249128	0.0100794	0	0.00139257	0	0	0	0	0	0	0.0327475	0.0574352	0	0	0	0	0
KCNA4	0.00241339	506	0.10679	0	0	0	0	0	0	0	0	0.020881	0	0	0	0	0	0	0.0183485	0	0	0.0302365	0.00510289	0	0	0	0	0	0	0	0	0	0	0	0	0	0	0	0	0	0	0	0	0	0	0	0	0	0
KCNA5	0.00819186	438	0.451911	0	0	0	0	0	0	0	0	0	0	0	0	0	0.063725	0	0	0	0	0	0	0.1633	0	0	0	0.00473312	0	0.0211121	0.00143303	0.00501572	0	0.0121436	0.228251	0.0016015	0.0177658	0.0185844	0	0.0282436	0	0.0296771	0	0	0	0	0	0	0
KCNC3	0.00178429	515	0.130117	0	0	0	0	0	0	0	0	0	0.00716438	0.00263776	0	0.00454963	0	0	0.00220252	0	0	0	0	0	0	0	0	0	0	0	0.00577225	0.00107979	0	0	0.0132254	0	0.00451964	0	0	0	0	0	0	0	0	0	0	0	0
KCNRG	0.00166482	518	0.277844	0	0	0	0	0	0	0	0	0.0037536	0.00253576	0	0.00365519	0	0	0	0.0016352	0	0.00824824	0.00138974	0	0	0	0	0	0	0	0	0	0	0	0	0	0	0	0	0	0	0	0	0	0	0	0	0	0	0
KCNS3	0.012701	409	0.352494	0	0	0	0	0	0	0	0	0	0.00679874	0	0.00485409	0.00500531	0	0	0	0.0133332	0	0	0.0123231	0	0	0	0	0.0183325	0.0973889	0	0.00354905	0.0069828	0	0	0.02726	0.00647048	0	0.0177984	0	0.0242487	0	0.0323294	0	0	0	0	0	0.0531669	0
KCTD1	0.0139024	399	0.298467	0	0	0	0	0	0	0	0	0.0193649	0.00635879	0.0199848	0.0170318	0.0061316	0	0	0.0288087	0.0309205	0.0218718	0.0243748	0.0054095	0	0.101147	0	0	0.0112096	0.0542831	0.020057	0.00567086	0.0280127	0.00835356	0	0.0303732	0.0195463	0	0.0407511	0.0445494	0.0504814	0	0	0.0101615	0	0	0	0	0	0
KCTD14	0.0122644	411	0.212766	0	0	0	0	0	0	0	0	0.037777	0.0100596	0.0161117	0.0179694	0.00551192	0	0.0349614	0.0920585	0	0.0960877	0.0863673	0.0092857	0.0362579	0	0	0.199795	0.00602954	0	0	0	0.00189225	0	0	0	0.00168983	0	0	0	0	0	0	0.015159	0	0	0	0	0	0
KCTD15	0.0151393	390	0.362758	0	0	0	0	0	0	0	0	0	0	0.00322419	0.0386326	0	0	0	0.0046802	0.0955232	0	0	0.0345201	0.0476394	0	0	0	0.0520538	0	0.0314114	0.0063319	0.0205997	0.00764314	0.012386	0.0473276	0.00820779	0.0629176	0.0668241	0.047286	0.0106326	0.0503391	0.0288458	0.021146	0	0	0	0	0	0
KCTD17	0.0103258	423	0.270284	0	0	0	0	0	0	0	0	0.0170365	0.0217948	0.00933804	0.00526561	0.0126886	0.0329651	0.0141643	0.00916284	0.0241608	0.0106185	0.0160158	0.0127195	0.0218944	0	0	0	0.00408431	0	0	0.0091186	0.0108888	0.0128255	0	0	0.013474	0.0102865	0	0.0141657	0.0123493	0	0	0.0103298	0	0	0	0	0	0
KLHL11	0.000649982	535	0.0690607	0	0	0	0	0	0	0	0	0	0.00226606	0	0.00395012	0	0	0.0125991	0.00224224	0	0	0.00206484	0	0	0	0	0	0	0	0	0.00187508	0	0	0	0	0.00162201	0	0	0	0	0	0	0.012391	0	0	0	0	0	0
KLHL13	0.0186824	358	0.440005	0	0	0	0	0	0	0	0	0.0049125	0	0.00553545	0.0037538	0.00583439	0	0	0.0148892	0	0	0.013531	0	0.0455179	0.0798563	0	0	0.00193467	0	0	0.00680918	0.0152795	0.00710922	0	0.0614919	0.0121881	0	0.0199839	0.0295142	0	0	0.0329662	0.0221114	0	0	0	0	0	0
KLHL23	0.0168104	377	0.309911	0	0	0	0	0	0	0	0	0	0	0.00777679	0.00900685	0	0.0282234	0	0.0045373	0	0	0.00360142	0.0110231	0.182152	0	0	0	0.00688586	0	0	0.00143345	0.0022017	0.00653928	0.00918099	0.0957962	0.00192417	0.00902694	0.0214147	0	0	0	0	0.0090462	0.0053683	0.0313815	0	0	0	0
KLHL25	0.00593562	459	0.327753	0	0	0	0	0	0	0	0	0.00837873	0.0115903	0.00611996	0	0	0.0276302	0	0.00238779	0.0135448	0	0.00206898	0	0	0	0	0	0.00698795	0.0811012	0	0.00218403	0.00198746	0	0	0.0145809	0.00794098	0	0	0.0146623	0	0	0	0.0196858	0.0070806	0.0299294	0	0.0999757	0	0
KLHL3	0.00744966	447	0.344676	0	0	0	0	0	0	0	0	0	0	0	0.00463232	0	0	0	0.00927603	0.0513228	0	0.00560454	0.0111957	0	0	0	0	0.051258	0	0.0159489	0.00626561	0.0145285	0	0.0140309	0.0129475	0.0140006	0.073471	0.0181446	0.0106882	0.00968017	0	0	0.0221831	0	0	0	0	0	0
KLHL4	0.0234255	315	0.394131	0	0	0	0	0	0	0	0	0.0982042	0.020025	0.0207549	0.023587	0.0154208	0.0954392	0.0159995	0.128052	0.0805115	0.139102	0.153429	0.0557031	0.0682397	0.0802009	0	0.104034	0.00835876	0	0	0	0.00860608	0	0	0	0	0.00837392	0	0	0	0.0690968	0	0.00991071	0	0	0	0	0	0
KRT8	0.422878	6	4.00334	0	0	0	0	0	0	0	0	0.260016	0.0459803	0.0744205	0.0853325	0.0838718	0	0.0300286	0.136821	0.0566219	0.145541	0.244341	0.0642197	0.0751219	0.18993	0	0.10286	0.0217478	1.1495	0	0	0.00742358	0	0	0.0417989	0.00611767	0.0264016	0.0214658	0.00916978	0.0502877	0.553745	0	0	0.500765	0.510228	1.11512	0.366407	2.32555	0.199372
LNX1	0.0215847	334	0.61309	0	0	0	0	0	0	0	0	0	0.00281291	0.00211003	0.0136709	0	0	0	0	0.0597903	0	0.00347247	0.0681088	0	0.0777193	0	0	0.129069	0	0.0170954	0.0131118	0.0343367	0.0077516	0.0181225	0.0308565	0.0326803	0.119764	0.0187161	0	0.0827205	0.0716437	0	0.0240606	0.00676435	0	0	0	0.0768812	0
LONRF2	0.0180331	365	0.383948	0	0	0	0	0	0	0	0	0.0196242	0.00619287	0.0214862	0.00412172	0.0131459	0.0204896	0	0.0234447	0.0106526	0	0.0204698	0.00304528	0	0	0	0	0.00564916	0	0.0166838	0.00932601	0.0319775	0.00765414	0	0.0149733	0.0333824	0.00529818	0.0391261	0.0466677	0	0.113768	0.0587148	0	0	0	0	0	0	0
LRRC29	0.00409209	483	0.112495	0	0	0	0	0	0	0	0	0.024738	0.00260512	0.00886452	0.0137668	0.00667452	0	0	0.0051267	0.0120503	0.0110071	0.0107564	0.0133925	0	0	0	0.0983335	0.00215187	0	0.0185577	0.00178131	0.00103992	0.00885011	0	0	0.0032989	0.00432675	0	0	0	0	0	0	0.00634739	0.0310661	0	0	0	0
MID1	0.0513226	174	0.61309	0	0	0	0	0	0	0	0	0.0119445	0.00279314	0.00314072	0.0278791	0.0099784	0.0316456	0	0.0015073	0.0901151	0	0.0101469	0.0942375	0	0	0	0	0.269407	0.125016	0.07223	0.0503296	0.170209	0.056078	0.041721	0.111208	0.165372	0.156399	0.15298	0.115616	0.114866	0	0.0977373	0.0824909	0.0137598	0	0	0	0.0788149	0
MID2	0.00583369	462	0.106093	0	0	0	0	0	0	0	0	0.00963128	0	0.00592291	0.00919213	0	0	0	0	0.012916	0	0.00853249	0.0190282	0	0	0	0	0.0218391	0	0	0.00526732	0.00262998	0	0	0	0.00632268	0.00525451	0.0184635	0	0.00954222	0	0.034585	0.011165	0	0	0	0	0	0
NEDD4	0.022445	323	0.634908	0	0	0	0	0	0	0	0	0.00469565	0.00557434	0.00270896	0.00325745	0	0	0.0164295	0.0047093	0.121199	0.0170085	0.0105271	0.070593	0	0.0595683	0	0	0.0938581	0.0470616	0.021652	0.0127423	0.0332823	0.013431	0	0.0350838	0.0263519	0.106452	0.0192091	0	0.0141523	0	0	0.0361195	0	0	0	0	0	0
NEURL3	0.00914108	429	0.345885	0	0	0	0	0	0	0	0	0.00862055	0.00800196	0.00540283	0.00524101	0	0	0	0	0	0	0	0	0	0	0	0	0.00606488	0	0	0.00982612	0	0.0532728	0	0	0	0	0	0	0	0	0	0	0	0	0	0	0	0
NHLRC1	0.00112367	529	0.0598465	0	0	0	0	0	0	0	0	0.00313366	0.00298375	0.00316447	0.00512762	0	0	0	0.00449487	0	0	0	0	0	0	0	0	0	0	0	0	0	0	0	0	0	0	0	0	0	0	0	0	0	0	0	0	0	0
PCGF2	0.0298456	279	1.34403	0	0	0	0	0	0	0	0	0.0728931	0	0.00608112	0.0481229	0.0069483	0.0270127	0.016986	0.0378122	0.0594141	0.04588	0.0491611	0.0948018	0.0316111	0	0	0	0.108751	0	0.0168798	0.0217616	0.0416367	0.0416769	0	0.0227015	0.0466773	0.10996	0	0.00818076	0.0356334	0.0548256	0	0.0573387	0.00723994	0	0	0	0.034595	0
PDZRN3	0.0460907	195	0.307831	0	0	0	0	0	0	0	0	0.0751759	0.00303155	0.00760866	0.00507952	0.0132866	0	0	0.0519374	0.0288401	0.00911367	0.0359116	0.0153662	0	0	0	0	0.0344934	0.0806845	0.0359704	0.0294208	0.135256	0.0256218	0.0103953	0.247346	0.172684	0.0289679	0.134232	0.115423	0.143423	0.0649584	0.173965	0.0932465	0	0	0	0	0	0
RAB40C	0.00750845	445	0.334894	0	0	0	0	0	0	0	0	0.00881727	0	0.00266444	0	0.00688674	0	0	0	0	0.0233916	0.00588431	0.00524707	0	0	0	0.0911521	0.00186696	0	0	0.00753941	0.00422845	0.00754274	0	0.0129414	0.00452146	0.00971055	0	0.00729954	0	0	0.029017	0.0120949	0	0	0	0	0	0
RAG1	0.00173082	516	0.0692321	0	0	0	0	0	0	0	0	0	0.00544133	0	0.00476941	0.00573354	0	0	0.00631618	0	0.0132984	0	0.00244456	0.0136186	0	0	0	0.00097566	0	0	0.00183285	0.00438346	0	0	0	0	0.0134615	0	0.00858019	0	0	0.0283006	0.011007	0	0	0	0	0	0
RAPSN	0.00293066	502	0.361015	0	0	0	0	0	0	0	0	0	0.0038328	0	0	0	0	0	0.00321592	0	0	0	0	0	0	0	0	0	0	0	0	0	0	0	0	0	0	0	0	0	0	0	0	0	0	0	0	0	0
RNF148	0.000571414	537	0.0380734	0	0	0	0	0	0	0	0	0	0	0	0.0145648	0	0	0.0170451	0	0	0	0	0	0	0	0	0	0	0	0	0	0	0	0	0	0.00467226	0	0	0	0	0	0	0	0	0	0	0	0	0
RNF152	0.020461	345	0.61309	0	0	0	0	0	0	0	0	0	0.00251518	0.0092073	0	0.00492536	0	0	0.00326591	0	0	0	0.0410131	0	0	0	0	0.0329255	0	0	0.00689759	0.0117522	0.0129596	0	0.0584937	0.008481	0.0163758	0.0191732	0.0277164	0.0495572	0	0	0	0	0	0	0	0	0
RNF157	0.00900267	431	0.126759	0	0	0	0	0	0	0	0	0.00242189	0	0.00325561	0	0	0	0	0	0	0	0	0	0	0	0	0.0956809	0.00326409	0	0.0156995	0.00179615	0.000778801	0	0	0	0.00158325	0.00436964	0	0	0	0	0	0	0.0142365	0	0	0	0.0464406	0
RNF175	0.00149809	521	0.210747	0	0	0	0	0	0	0	0	0	0	0.00303899	0	0.00609067	0	0	0	0	0	0	0	0	0	0	0	0.00194203	0	0	0	0.00222374	0	0	0	0.00326029	0	0.0213894	0	0	0	0	0	0	0	0	0	0	0
RNF180	0.00784586	443	0.229503	0	0	0	0	0	0	0	0	0.0121842	0	0	0.013765	0	0	0	0.00253405	0.024485	0.0117924	0.00828565	0.0181809	0.0267333	0	0	0	0.0261069	0	0	0.00532058	0.0214876	0	0	0.100324	0.0250366	0.0232369	0.0204263	0.00961741	0.0133888	0.0503391	0	0.0440793	0	0	0	0	0	0
RNF207	0.00627948	456	0.384255	0	0	0	0	0	0	0	0	0.00291031	0.00232719	0.00501115	0.00786982	0	0	0	0.00368827	0	0	0.0101675	0.00856423	0	0	0	0	0.00424343	0.0564435	0.0221247	0	0.00386018	0	0	0.0129782	0.00944182	0.0138188	0	0.0202707	0.0119617	0	0	0.0237889	0	0	0	0	0	0
RNF208	0.00411978	482	0.302968	0	0	0	0	0	0	0	0	0.0033738	0.00315588	0.00880695	0.0102087	0	0	0.0153478	0.00520119	0.0140127	0	0.00352154	0.00551095	0	0	0	0	0	0	0	0	0.0050211	0.0128552	0	0	0.00318594	0.00381134	0	0	0	0	0	0	0	0	0	0	0	0
RNF212	0.00943998	425	0.149046	0	0	0	0	0	0	0	0	0	0	0.00320132	0	0	0	0	0.00548107	0	0	0.00907219	0.00630025	0	0	0	0	0	0	0	0.00168212	0.013392	0	0	0	0.00990461	0.00855094	0	0.00823253	0	0	0	0	0	0	0	0	0	0
RNF32	0.00275263	504	0.20889	0	0	0	0	0	0	0	0	0.0125907	0	0	0.00494407	0	0	0	0	0	0	0.00145979	0.0068573	0	0	0	0	0.00250092	0	0	0	0.00113383	0.00614331	0.0113363	0.0274855	0	0.00396734	0	0	0	0	0	0	0	0	0	0	0	0
RNF43	0.00681848	452	0.174446	0	0	0	0	0	0	0	0	0	0	0.00849643	0	0	0	0	0.017119	0	0	0.0127626	0.00216709	0	0	0	0	0	0	0	0	0	0	0	0	0	0	0	0	0	0	0	0	0.00929812	0	0	0	0.0562557	0
SH3RF2	0.0128165	406	1.24352	0	0	0	0	0	0	0	0	0.00712191	0	0.00815501	0	0	0	0	0	0	0	0.00189571	0	0	0	0	0	0.00157784	0.054195	0	0	0	0.00872933	0	0.0134055	0	0.00532425	0	0	0.0113364	0	0	0	0.00601661	0	0	0	0.0667397	0
SLX4	0.00365546	493	0.251674	0	0	0	0	0	0	0	0	0	0.00333912	0	0	0	0	0.0174145	0.0029987	0.0115869	0	0.00139267	0.00552145	0	0	0	0	0.00188776	0.066219	0.0221392	0.00187643	0.0048913	0	0	0	0.00451281	0.00905574	0	0	0	0	0	0.0243311	0	0	0	0	0	0
SOCS2	0.0771407	100	0.897293	0	0	0	0	0	0	0	0	0.199403	0.0115922	0.024048	0.156585	0.0415119	0	0.0152423	0.0252186	0.157179	0.0312422	0.0380564	0.324287	0.0248489	0.0595683	0	0	0.497655	0.0732205	0.101406	0.0490369	0.118268	0.0462506	0.071955	0.0817977	0.179857	0.39344	0.0970371	0.23423	0.056727	0.0503391	0.0891965	0.0808292	0	0	0	0	0.0402985	0.211773
SPSB2	0.0185536	359	0.44501	0	0	0	0	0	0	0	0	0.0909105	0.041309	0.0423072	0.0644059	0.0228223	0.0992877	0.0704336	0.0343415	0.0226926	0.0137236	0.0358246	0.0179641	0.0355951	0.100351	0	0	0.00629578	0.0542579	0.0135982	0.00319099	0.00309583	0	0	0.0159904	0.00478116	0.00869502	0	0.0069253	0	0	0	0.0136069	0.013875	0	0	0	0.15638	0
TRAF2	0.0144915	395	0.26412	0	0	0	0	0	0	0	0	0.00394664	0.0110067	0.0202825	0	0	0	0.0186285	0.00908936	0.0104417	0	0.0110932	0.00840675	0	0	0	0	0.0204702	0.0803484	0	0.00517341	0.00514225	0.00956713	0	0	0.00675734	0.0102122	0	0	0.0214854	0	0	0.0136941	0.0434551	0.0587997	0	0.119324	0.0914568	0
TRAIP	0.00397166	486	0.169538	0	0	0	0	0	0	0	0	0	0.00320061	0.00855619	0	0	0	0	0	0	0.0206698	0.00130069	0	0	0	0	0	0.00209709	0	0	0.00363216	0.00446551	0	0.0128844	0	0.00355254	0.00361746	0	0.00880029	0.0113364	0	0	0	0	0	0	0	0	0
TRIM45	0.0045462	480	0.145433	0	0	0	0	0	0	0	0	0.00404024	0	0.00564518	0.00481415	0	0	0	0.0164484	0	0	0.0168118	0	0	0	0	0	0	0	0	0	0.00548915	0	0.00961989	0	0.00436908	0	0	0	0.00972094	0	0	0	0	0	0	0	0	0
TRIM54	0.00148979	522	0.156245	0	0	0	0	0	0	0	0	0.00659737	0	0.00571494	0	0	0.0312697	0	0.0051009	0	0	0.00216807	0	0.0199007	0	0	0	0	0	0	0	0	0	0	0	0	0	0	0	0	0	0	0	0	0	0	0	0	0
TRIM59	0.0126403	410	0.203266	0	0	0	0	0	0	0	0	0	0.00552448	0.0108232	0	0	0	0	0.00280099	0	0	0.00181905	0.00331227	0	0	0	0	0.00364249	0	0	0.00809376	0.00225275	0	0	0.011966	0.00475556	0.0167857	0.0177556	0.0100128	0.0119326	0	0.0332287	0	0	0	0	0	0	0
TRIM61	0.00213851	509	0.0705003	0	0	0	0	0	0	0	0	0.00474375	0	0	0	0	0	0	0.00221377	0	0	0	0.00541087	0	0	0	0	0	0	0	0	0	0	0	0	0	0	0	0	0	0	0	0	0	0	0	0	0	0
TRIM62	0.00816226	439	0.154556	0	0	0	0	0	0	0	0	0	0.0106217	0.00320384	0.00983384	0	0	0	0.00822769	0.0108021	0	0	0.00312303	0	0	0	0	0.00470749	0	0	0	0.00575301	0.00811732	0	0.0290629	0.00487095	0.00554604	0.0231851	0.00952256	0.0118846	0	0	0	0	0	0	0	0	0
TRIM7	0.00461619	478	0.147232	0	0	0	0	0	0	0	0	0.00380306	0	0.0031549	0.00506503	0	0	0	0.00538828	0	0.0196164	0.00702294	0	0.0260032	0	0	0	0.00625946	0.115498	0	0.00306716	0.0197953	0.00778625	0	0.0257267	0.00794385	0.00828421	0	0	0.0125746	0.0573981	0	0.0224594	0	0	0	0	0	0
TRIM9	0.0164919	379	0.562995	0	0	0	0	0	0	0	0	0.00650647	0	0	0.00457483	0	0	0	0.00265523	0	0	0.0030359	0	0	0	0	0	0.00206436	0	0	0.0071694	0.0170011	0.00455841	0	0.0250046	0.0203016	0.00513051	0.037509	0.0510636	0.0134788	0	0	0	0	0	0	0	0	0
UBOX5	0.00931293	427	0.141193	0	0	0	0	0	0	0	0	0	0.0114241	0.0196106	0.00434173	0.0118055	0.0633181	0.0356387	0.0043444	0.0123623	0	0.00819977	0	0.0166124	0	0	0	0	0	0	0.00536215	0.00210805	0	0.00918639	0	0.00751569	0.00393207	0.0116018	0	0	0	0	0	0	0	0	0	0	0
UHRF1	0.00526503	470	0.237047	0	0	0	0	0	0	0	0	0	0.00296329	0.0055704	0	0	0	0	0	0	0	0	0	0	0	0	0	0.00213403	0.0470616	0	0.00186126	0.000873024	0	0.0193251	0	0.00147347	0.00412474	0	0.00545098	0	0	0	0.0116785	0	0	0	0	0	0
ZBTB32	0.00327967	495	0.255372	0	0	0	0	0	0	0	0	0	0.0033726	0.0503248	0.00365649	0	0	0	0	0	0	0	0	0	0	0	0	0	0	0	0	0	0	0	0	0	0	0	0	0	0	0	0	0.0137734	0.0347279	0	0	0	0
ZBTB46	0.00682649	451	0.129175	0	0	0	0	0	0	0	0	0	0.00332656	0	0.0206392	0.00689609	0.0477014	0	0.00219436	0.0230322	0.0134281	0.00425255	0.0692953	0	0	0	0	0.0197167	0	0.0172128	0.00782045	0.00194984	0.00674953	0	0.0216273	0	0.046848	0.0400588	0.00997664	0.0130402	0	0	0	0	0	0	0	0	0
ZBTB7C	0.0142577	396	0.230893	0	0	0	0	0	0	0	0	0.0286669	0.00282152	0.00442502	0.00466197	0	0	0	0.00451861	0	0.0173758	0.010452	0.00242606	0	0	0	0	0.0115749	0	0	0.00835381	0.0366725	0.0158414	0.0127838	0.0888004	0.0218725	0.0219886	0.0166128	0.019215	0.0361517	0.115738	0	0	0.00949398	0	0	0	0.0914568	0
ZFAND4	0.00685447	450	0.102574	0	0	0	0	0	0	0	0	0.0134388	0	0.00621625	0	0.00540699	0	0	0.0100791	0	0.012064	0.00796378	0.00982857	0.0257688	0.0595683	0	0.102574	0.00850818	0	0.020057	0.00540585	0.00801466	0.0120414	0.0184146	0	0.0126335	0.00899662	0	0.0165377	0	0	0	0.012018	0	0	0	0	0	0
ZNRF3	0.0184334	360	0.219993	0	0	0	0	0	0	0	0	0.00504993	0.00254203	0.00293655	0.0044429	0	0	0	0.00485195	0.0621513	0	0.00676106	0.00915966	0	0	0	0	0.0417067	0	0	0.00321322	0.0120286	0.0141779	0.0105821	0.0425239	0.0261641	0.0319267	0.0158536	0.0480928	0.0236829	0	0.0337322	0	0	0	0	0	0	0
KBTBD12	0.00324172	496	0.194226	0	0	0	0	0	0	0	0	0	0	0	0	0	0	0	0	0	0	0.00330871	0	0	0	0	0	0.00196944	0	0	0	0.0032893	0	0	0.0136653	0.0015168	0.00389063	0	0	0	0	0	0	0	0	0	0	0	0
KCND2	0.00654449	455	0.186144	0	0	0	0	0	0	0	0	0	0	0	0	0	0	0	0	0	0	0.00346215	0	0	0	0	0	0.00648952	0	0.020764	0.00346642	0.0188036	0	0.0101496	0	0.0322135	0.00923631	0	0.00904156	0	0	0	0.0543224	0	0	0	0	0	0
KCNG3	0.00164898	519	0.156075	0	0	0	0	0	0	0	0	0	0	0	0	0	0	0	0	0	0	0.00422413	0	0	0	0	0	0.00489387	0	0	0	0	0	0.00878942	0	0	0	0	0.00927472	0	0	0.156075	0	0	0	0	0	0	0
KLHL14	0.00167303	517	0.214868	0	0	0	0	0	0	0	0	0	0	0	0	0	0	0	0	0	0	0	0.00339385	0	0.0984847	0	0	0	0	0	0	0	0	0	0	0	0	0	0	0	0	0	0	0	0	0	0	0	0
KLHL31	0.000951261	531	0.0352971	0	0	0	0	0	0	0	0	0	0	0	0	0	0	0	0	0.0138578	0	0	0	0	0	0	0	0	0	0	0	0	0	0	0	0	0	0	0	0	0	0	0	0	0	0	0	0	0
MEX3A	0.00457965	479	0.251375	0	0	0	0	0	0	0	0	0	0	0	0	0	0	0	0.00303376	0.0135345	0	0.00292469	0.00320985	0	0	0	0	0.0225782	0	0	0.00165787	0	0	0	0	0.00328053	0.015857	0	0.00891487	0	0	0	0	0	0	0	0	0	0
OTUD7A	0.00861745	434	0.256073	0	0	0	0	0	0	0	0	0	0	0	0	0	0	0	0.00293425	0	0	0.00200715	0.00682711	0	0	0	0	0	0	0.0159489	0.00366151	0.00319007	0	0	0	0.00302596	0.011395	0	0.0193724	0	0	0	0	0	0	0	0	0	0
RAB40A	0.000233172	554	0.025903	0	0	0	0	0	0	0	0	0	0	0	0	0	0	0	0	0	0	0	0	0	0	0	0	0	0	0	0	0.000974191	0	0	0	0.00147106	0	0	0	0.025903	0	0	0	0	0	0	0	0	0
RNF183	0.000744826	533	0.0385456	0	0	0	0	0	0	0	0	0	0	0	0	0	0	0	0.00240198	0	0	0	0	0	0	0	0	0	0	0	0	0	0	0	0	0	0	0	0	0	0	0	0	0	0	0	0	0	0
RNF39	0.00806651	440	0.253605	0	0	0	0	0	0	0	0	0	0	0	0	0	0	0	0.00221302	0.0068257	0	0.00493731	0	0	0	0	0	0	0.0466738	0	0	0	0	0	0	0.00169814	0	0	0	0	0.191126	0	0	0	0	0	0	0	0
TRIM31	0.00562689	468	0.316734	0	0	0	0	0	0	0	0	0	0	0	0	0	0	0	0	0	0.00898573	0.00148272	0.00255353	0	0	0	0	0	0	0	0	0	0	0	0	0	0	0	0	0	0	0	0	0.0289309	0	0.190288	0	0.0620481	0
TRIM46	0.00117984	527	0.184357	0	0	0	0	0	0	0	0	0	0	0	0	0	0	0	0	0	0.0136476	0	0	0	0	0	0	0	0	0	0	0	0	0	0	0	0	0	0	0	0	0	0	0	0	0	0	0	0
TRIM58	0.000569563	538	0.358312	0	0	0	0	0	0	0	0	0	0	0	0	0	0	0	0	0	0	0	0	0	0	0	0	0	0	0	0	0	0	0	0	0	0	0	0	0	0	0	0	0	0	0	0	0	0
TRIM67	0.000236115	553	0.103181	0	0	0	0	0	0	0	0	0	0	0	0	0	0	0	0.00196876	0	0	0	0	0	0	0	0	0	0	0	0	0	0	0	0	0	0	0	0	0	0	0	0	0	0	0	0	0	0
BIRC7	0.000297862	546	0.0205268	0	0	0	0	0	0	0	0	0	0	0	0	0	0	0	0	0	0	0	0	0	0	0	0	0	0	0	0.00754421	0	0.00757101	0.0205268	0	0	0	0	0	0	0	0	0	0	0	0	0	0	0
HECW1	0.00117236	528	0.210747	0	0	0	0	0	0	0	0	0	0	0	0	0	0	0	0	0	0	0	0	0	0	0	0	0	0	0	0	0.00378025	0	0	0	0.00137501	0	0	0	0	0	0	0	0	0	0	0	0	0
KCNA2	0.00362419	494	0.693654	0	0	0	0	0	0	0	0	0	0	0	0	0	0	0	0	0	0	0	0	0	0	0	0	0	0	0	0.00354665	0	0	0	0	0.00472414	0	0	0	0	0	0	0	0	0	0	0	0	0
KCND1	0.00572778	465	0.0718485	0	0	0	0	0	0	0	0	0	0	0	0	0	0	0	0	0	0	0	0	0	0	0	0	0.00231175	0	0.0186238	0.00729545	0.0254213	0	0	0.0504243	0.0336775	0.0124764	0	0.0433648	0	0	0	0	0	0	0	0	0	0
KCNS2	0.000252792	550	0.00920713	0	0	0	0	0	0	0	0	0	0	0	0	0	0	0	0	0	0	0	0	0	0	0	0	0	0	0	0	0	0	0	0	0.00512154	0	0	0	0	0	0	0	0	0	0	0	0	0
KCTD16	0.00676005	453	0.356434	0	0	0	0	0	0	0	0	0	0	0	0	0	0	0	0	0	0	0	0	0	0	0	0	0	0	0	0	0.00214326	0	0	0	0	0	0	0	0.0123493	0	0	0	0	0	0	0	0	0
KCTD8	0.00293882	500	0.182101	0	0	0	0	0	0	0	0	0	0	0	0	0	0	0	0	0	0	0	0	0	0	0	0	0	0	0	0.00208925	0	0	0	0	0	0	0	0.00894421	0	0.0694876	0	0	0	0	0	0	0	0
KLHL33	0.00123781	526	0.0508822	0	0	0	0	0	0	0	0	0	0	0	0	0	0	0	0	0	0	0	0	0	0	0	0	0.00233108	0	0	0	0.0155581	0	0.0103953	0	0.00660912	0	0	0.00929532	0	0	0	0	0	0	0	0	0	0
KLHL41	0.00515644	472	0.680843	0	0	0	0	0	0	0	0	0	0	0	0	0	0	0	0	0	0	0	0	0	0	0	0	0	0	0	0	0	0	0	0	0.00170282	0	0.017777	0	0	0	0.0278554	0.0105149	0	0	0	0	0	0
MKRN3	0.00211442	510	0.356434	0	0	0	0	0	0	0	0	0	0	0	0	0	0	0	0	0	0	0	0	0	0	0	0	0	0	0	0	0.00414124	0.0158684	0	0	0.00157071	0	0	0	0	0	0	0	0	0	0	0	0	0
PDZRN4	0.00598426	458	0.141398	0	0	0	0	0	0	0	0	0	0	0	0	0	0	0	0	0	0	0	0	0	0	0	0	0.00261328	0	0	0.00378701	0.0144549	0.00674953	0	0	0.00953623	0	0	0.0172271	0	0	0.0296771	0.0101501	0	0	0	0	0	0
RFPL4B	0.000734413	534	0.0272097	0	0	0	0	0	0	0	0	0	0	0	0	0	0	0	0	0	0	0	0	0	0	0	0	0.00168276	0	0	0.00180411	0.00284642	0	0	0	0.00673978	0.00347904	0	0	0	0	0	0	0	0	0	0	0	0
RNF112	0.0039837	485	0.362004	0	0	0	0	0	0	0	0	0	0	0	0	0	0	0	0	0	0	0	0	0	0	0	0	0.00629571	0	0	0.00388211	0.0009801	0	0.00906705	0	0.00446435	0	0.019676	0	0	0	0	0	0	0	0	0	0	0
RNF165	0.00181811	514	0.0381454	0	0	0	0	0	0	0	0	0	0	0	0	0	0	0	0	0	0	0	0	0	0	0	0	0.00210551	0	0	0.00189292	0.0032036	0	0	0	0.00667748	0.00732236	0	0.00961741	0	0	0	0	0	0	0	0	0	0
SPSB4	0.00321156	497	0.0852953	0	0	0	0	0	0	0	0	0	0	0	0	0	0	0	0	0	0	0	0	0	0	0	0	0	0	0	0	0.00100242	0	0.0100482	0	0	0	0	0	0	0	0	0.0123285	0	0	0	0	0	0
TRIM10	0.000485438	540	0.0936997	0	0	0	0	0	0	0	0	0	0	0	0	0	0	0	0	0	0	0	0	0	0	0	0	0	0	0	0	0.000698781	0	0	0	0.00315574	0	0	0	0	0	0	0	0	0	0	0	0	0
TRIM17	0.000776705	532	0.0421528	0	0	0	0	0	0	0	0	0	0	0	0	0	0	0	0	0	0	0	0	0	0	0	0	0	0	0	0	0.00180695	0	0	0	0	0	0	0	0	0	0	0.00991427	0	0	0	0	0	0
TRIM63	0.00136616	524	0.520031	0	0	0	0	0	0	0	0	0	0	0	0	0	0	0	0	0	0	0	0	0	0	0	0	0.00668708	0	0	0.00549861	0.00278108	0	0.0110495	0	0.00301186	0	0.368385	0.040822	0.0136722	0	0	0	0	0	0	0	0	0
TRIM72	0.000286178	548	0.0197025	0	0	0	0	0	0	0	0	0	0	0	0	0	0	0	0	0	0	0	0	0	0	0	0	0.0023242	0	0	0	0.00191622	0	0	0	0	0	0	0	0	0	0	0	0	0	0	0	0	0
CBLC	0.0108887	420	0.442612	0	0	0	0	0	0	0	0	0	0	0	0	0	0	0	0	0	0	0	0	0	0	0	0	0	0	0	0	0	0	0	0	0	0	0	0	0	0	0	0	0.0128701	0.0343106	0	0	0.136581	0
RNF186	0.0105986	422	0.954373	0	0	0	0	0	0	0	0	0	0	0	0	0	0	0	0	0	0	0	0	0	0	0	0	0	0	0	0	0	0	0	0	0	0	0	0	0	0	0	0	0	0.0644007	0	0	0.166112	0
TRIM15	0.0058662	461	1.44266	0	0	0	0	0	0	0	0	0	0	0	0	0	0	0	0	0	0	0	0	0	0	0	0	0	0	0	0	0	0	0	0	0	0	0	0	0	0	0	0	0.0149521	0	0	0	0.0995246	0
RNF182	0.0039233	487	0.191339	0	0	0	0	0	0	0	0	0	0	0	0	0	0	0	0	0	0	0	0	0	0	0	0	0	0	0	0	0	0	0	0	0	0	0	0	0	0	0	0	0	0	0	0	0	0
KLHL32	0.0168538	374	0.425843	0	0	0	0	0	0	0	0	0	0	0	0	0	0	0	0	0	0	0	0	0	0	0	0	0	0	0	0	0	0	0	0	0	0	0	0	0	0	0	0	0	0	0	0	0	0
RNF17	9.19643e-05	564	0.0154051	0	0	0	0	0	0	0	0	0	0	0	0	0	0	0	0	0	0	0	0	0	0	0	0	0	0	0	0	0	0	0	0	0	0	0	0	0	0	0	0	0	0	0	0	0	0
ASB5	0.0018497	513	0.228119	0	0	0	0	0	0	0	0	0	0	0	0	0	0	0	0	0	0	0	0	0	0	0	0	0	0	0	0	0	0	0	0	0	0	0	0	0	0	0	0	0	0	0	0	0	0
BTBD17	0.00499512	474	0.360483	0	0	0	0	0	0	0	0	0	0	0	0	0	0	0	0	0	0	0	0	0	0	0	0	0	0	0	0	0	0	0	0	0	0	0	0	0	0	0	0	0	0	0	0	0	0
DPF1	0.00186796	511	0.372968	0	0	0	0	0	0	0	0	0	0	0	0	0	0	0	0	0	0	0	0	0	0	0	0	0	0	0	0	0	0	0	0	0	0	0	0	0	0	0	0	0	0	0	0	0	0
FBXL16	0.00374212	490	0.609271	0	0	0	0	0	0	0	0	0	0	0	0	0	0	0	0	0	0	0	0	0	0	0	0	0	0	0	0	0	0	0	0	0	0	0	0	0	0	0	0	0	0	0	0	0	0
KCNA1	0.00098891	530	0.247902	0	0	0	0	0	0	0	0	0	0	0	0	0	0	0	0	0	0	0	0	0	0	0	0	0	0	0	0	0	0	0	0	0	0	0	0	0	0	0	0	0	0	0	0	0	0
KCNC1	0.00161917	520	0.21867	0	0	0	0	0	0	0	0	0	0	0	0	0	0	0	0	0	0	0	0	0	0	0	0	0	0	0	0	0	0	0	0	0	0	0	0	0	0	0	0	0	0	0	0	0	0
KCNG1	0.00130132	525	0.101838	0	0	0	0	0	0	0	0	0	0	0	0	0	0	0	0	0	0	0	0	0	0	0	0	0	0	0	0	0	0	0	0	0	0	0	0	0	0	0	0	0	0	0	0	0	0
KCNS1	0.000313947	545	0.0588691	0	0	0	0	0	0	0	0	0	0	0	0	0	0	0	0	0	0	0	0	0	0	0	0	0	0	0	0	0	0	0	0	0	0	0	0	0	0	0	0	0	0	0	0	0	0
KCTD4	0.00486891	475	0.372968	0	0	0	0	0	0	0	0	0	0	0	0	0	0	0	0	0	0	0	0	0	0	0	0	0	0	0	0	0	0	0	0	0	0	0	0	0	0	0	0	0	0	0	0	0	0
KLHL1	0.000105715	562	0.0593051	0	0	0	0	0	0	0	0	0	0	0	0	0	0	0	0	0	0	0	0	0	0	0	0	0	0	0	0	0	0	0	0	0	0	0	0	0	0	0	0	0	0	0	0	0	0
KLHL34	0.000161228	559	0.269805	0	0	0	0	0	0	0	0	0	0	0	0	0	0	0	0	0	0	0	0	0	0	0	0	0	0	0	0	0	0	0	0	0	0	0	0	0	0	0	0	0	0	0	0	0	0
RFPL1	0.000321159	544	0.107408	0	0	0	0	0	0	0	0	0	0	0	0	0	0	0	0	0	0	0	0	0	0	0	0	0	0	0	0	0	0	0	0	0	0	0	0	0	0	0	0	0	0	0	0	0	0
TRIM60	0.000165218	558	0.0168396	0	0	0	0	0	0	0	0	0	0	0	0	0	0	0	0	0	0	0	0	0	0	0	0	0	0	0	0	0	0	0	0	0	0	0	0	0	0	0	0	0	0	0	0	0	0
CCIN	0.000643259	536	0.0533445	0	0	0	0	0	0	0	0	0	0	0	0	0	0	0	0	0	0	0	0	0	0	0	0	0	0	0	0	0	0	0	0	0	0	0	0	0	0	0	0	0	0	0	0	0	0
KCNB2	0.00185324	512	0.0810095	0	0	0	0	0	0	0	0	0	0	0	0	0	0	0	0	0	0	0	0	0	0	0	0	0	0	0	0	0	0	0	0	0	0	0	0	0	0	0	0	0	0	0	0	0	0
KLHL30	0.00038841	541	0.0571554	0	0	0	0	0	0	0	0	0	0	0	0	0	0	0	0	0	0	0	0	0	0	0	0	0	0	0	0	0	0	0	0	0	0	0	0	0	0	0	0	0	0	0	0	0	0
RNF31	0.000244751	552	0.0155884	0	0	0	0	0	0	0	0	0	0	0	0	0	0	0	0	0	0	0	0	0	0	0	0	0	0	0	0	0	0	0	0	0	0	0	0	0	0	0	0	0	0	0	0	0	0
KCNV1	0.000293421	547	0.0578864	0	0	0	0	0	0	0	0	0	0	0	0	0	0	0	0	0	0	0	0	0	0	0	0	0	0	0	0	0	0	0	0	0	0	0	0	0	0	0	0	0	0	0	0	0	0
TRIM40	0.00025214	551	0.040601	0	0	0	0	0	0	0	0	0	0	0	0	0	0	0	0	0	0	0	0	0	0	0	0	0	0	0	0	0	0	0	0	0	0	0	0	0	0	0	0	0	0	0	0	0	0
RFPL4A	0.000323319	543	0.0663321	0	0	0	0	0	0	0	0	0	0	0	0	0	0	0	0	0	0	0	0	0	0	0	0	0	0	0	0	0	0	0	0	0	0	0	0	0	0	0	0	0	0	0	0	0	0
ASB14	1.07447e-05	571	0.0131809	0	0	0	0	0	0	0	0	0	0	0	0	0	0	0	0	0	0	0	0	0	0	0	0	0	0	0	0	0	0	0	0	0	0	0	0	0	0	0	0	0	0	0	0	0	0
ECT2L	0.000206305	556	0.429054	0	0	0	0	0	0	0	0	0	0	0	0	0	0	0	0	0	0	0	0	0	0	0	0	0	0	0	0	0	0	0	0	0	0	0	0	0	0	0	0	0	0	0	0	0	0
TRIM55	0.00565318	467	0.557872	0	0	0	0	0	0	0	0	0	0	0	0	0	0	0	0	0	0	0	0	0	0	0	0	0	0	0	0	0	0	0	0	0	0	0	0	0	0	0	0	0	0	0	0	0	0
ASB10	0.000346541	542	0.0613381	0	0	0	0	0	0	0	0	0	0	0	0	0	0	0	0	0	0	0	0	0	0	0	0	0	0	0	0	0	0	0	0	0	0	0	0	0	0	0	0	0	0	0	0	0	0
TRIML1	5.42531e-05	566	0.00641644	0	0	0	0	0	0	0	0	0	0	0	0	0	0	0	0	0	0	0	0	0	0	0	0	0	0	0	0	0	0	0	0	0	0	0	0	0	0	0	0	0	0	0	0	0	0
FBXO40	0.000205302	557	0.0722	0	0	0	0	0	0	0	0	0	0	0	0	0	0	0	0	0	0	0	0	0	0	0	0	0	0	0	0	0	0	0	0	0	0	0	0	0	0	0	0	0	0	0	0	0	0
ASB17	0	573	0	0	0	0	0	0	0	0	0	0	0	0	0	0	0	0	0	0	0	0	0	0	0	0	0	0	0	0	0	0	0	0	0	0	0	0	0	0	0	0	0	0	0	0	0	0	0
KLHL10	3.95501e-05	568	0.00924739	0	0	0	0	0	0	0	0	0	0	0	0	0	0	0	0	0	0	0	0	0	0	0	0	0	0	0	0	0	0	0	0	0	0	0	0	0	0	0	0	0	0	0	0	0	0
TRIM73	3.80055e-05	569	0.087934	0	0	0	0	0	0	0	0	0	0	0	0	0	0	0	0	0	0	0	0	0	0	0	0	0	0	0	0	0	0	0	0	0	0	0	0	0	0	0	0	0	0	0	0	0	0
ASB11	4.54538e-05	567	0.00105011	0	0	0	0	0	0	0	0	0	0	0	0	0	0	0	0	0	0	0	0	0	0	0	0	0	0	0	0	0	0	0	0	0	0	0	0	0	0	0	0	0	0	0	0	0	0
ASB15	0.000150015	560	0.0946603	0	0	0	0	0	0	0	0	0	0	0	0	0	0	0	0	0	0	0	0	0	0	0	0	0	0	0	0	0	0	0	0	0	0	0	0	0	0	0	0	0	0	0	0	0	0
ASB16	6.58405e-05	565	0.00949667	0	0	0	0	0	0	0	0	0	0	0	0	0	0	0	0	0	0	0	0	0	0	0	0	0	0	0	0	0	0	0	0	0	0	0	0	0	0	0	0	0	0	0	0	0	0
KLHL40	0.00022202	555	0.0698481	0	0	0	0	0	0	0	0	0	0	0	0	0	0	0	0	0	0	0	0	0	0	0	0	0	0	0	0	0	0	0	0	0	0	0	0	0	0	0	0	0	0	0	0	0	0
NEURL	9.48818e-05	563	0.0249131	0	0	0	0	0	0	0	0	0	0	0	0	0	0	0	0	0	0	0	0	0	0	0	0	0	0	0	0	0	0	0	0	0	0	0	0	0	0	0	0	0	0	0	0	0	0
ZBTB9	0.000274822	549	0.0452931	0	0	0	0	0	0	0	0	0	0	0	0	0	0	0	0	0	0	0	0	0	0	0	0	0	0	0	0	0	0	0	0	0	0	0	0	0	0	0	0	0	0	0	0	0	0
TRIM34	3.03158e-05	570	0.00444723	0	0	0	0	0	0	0	0	0	0	0	0	0	0	0	0	0	0	0	0	0	0	0	0	0	0	0	0	0	0	0	0	0	0	0	0	0	0	0	0	0	0	0	0	0	0
TRIM43	0	573	0	0	0	0	0	0	0	0	0	0	0	0	0	0	0	0	0	0	0	0	0	0	0	0	0	0	0	0	0	0	0	0	0	0	0	0	0	0	0	0	0	0	0	0	0	0	0
TRIM74	0	573	0	0	0	0	0	0	0	0	0	0	0	0	0	0	0	0	0	0	0	0	0	0	0	0	0	0	0	0	0	0	0	0	0	0	0	0	0	0	0	0	0	0	0	0	0	0	0
KCNC2	0.000130006	561	0.0317023	0	0	0	0	0	0	0	0	0	0	0	0	0	0	0	0	0	0	0	0	0	0	0	0	0	0	0	0	0	0	0	0	0	0	0	0	0	0	0	0	0	0	0	0	0	0
[truncated: 563 more columns]
